# Supplementary material for: Cell-Specific Transcriptional Responses to Heat Shock in the Mouse Utricle Epithelium
Source: Front Cell Neurosci. 2020 May 15;14:123. doi: 10.3389/fncel.2020.00123 (PMC7247426; doi:10.3389/fncel.2020.00123)
Supplement: Supplementary file 2 [file Table_2.xlsx]

## Sheet: Hair Cells
Molecular Function GO Annotation	Fold Enrichment	Adjusted p-value (FDR)
Type 3 Metabotropic Glutamate Receptor Binding	> 100	0.00164
CTP Binding	> 100	0.0336
Calcium Ion Binding Involved in Regulation of Presynaptic Cytosolic Calcium Ion Concentration	> 100	0.0302
Sulfonylurea Receptor Binding	> 100	0.0387
Nitric-Oxide Synthase Regulator Activity	> 100	0.000258
Unfolded Protein Binding	15.48	0.0149

## Sheet: Supporting Cells
Molecular Function GO Annotation	Fold Enrichment	Adjusted p-value (FDR)
CTP Binding	> 100	0.0127
Sulfonylurea Receptor Binding	> 100	0.0141
UTP Binding	> 100	0.0158
dATP Binding	> 100	0.0127
Unfolded Protein Binding	63.34	2.52e-06
