# Supplementary material for: Cell-Specific Transcriptional Responses to Heat Shock in the Mouse Utricle Epithelium
Source: Front Cell Neurosci. 2020 May 15;14:123. doi: 10.3389/fncel.2020.00123 (PMC7247426; doi:10.3389/fncel.2020.00123)
Supplement: Supplementary file 5 [file Table_5.xlsx]

## Sheet: A_wtHC_co_IP_vs_sfHC_co_IP
ensembl_gene_id	baseMean	log2FoldChange	lfcSE	stat	pvalue	padj
ENSMUSG00000000088	5411.67	-0.859285	0.161594	-5.31756	1.0517e-07	1.33386e-06
ENSMUSG00000000167	1511.57	-0.475119	0.203343	-2.33654	0.0194631	0.0600049
ENSMUSG00000000308	1615.59	0.176318	0.223297	0.789613	0.429754	0.591717
ENSMUSG00000000359	309.025	0.296675	0.284865	1.04146	0.297663	0.468571
ENSMUSG00000000552	5201.79	-0.352093	0.235592	-1.4945	0.135044	0.263935
ENSMUSG00000000581	4903.01	-0.747563	0.169636	-4.40685	1.04883e-05	9.18378e-05
ENSMUSG00000000682	525.627	-6.21664	1.55934	-3.98671	6.69951e-05	0.000477225
ENSMUSG00000000869	137.984	1.04332	0.445031	2.34438	0.0190585	0.0591079
ENSMUSG00000000982	633.043	-6.10419	0.426879	-14.2996	2.20116e-46	4.29226e-44
ENSMUSG00000001120	2246.53	-0.224	0.192328	-1.16467	0.244151	0.409984
ENSMUSG00000001128	127.153	-2.84868	0.867731	-3.2829	0.00102744	0.00532492
ENSMUSG00000001175	88592.4	-0.630791	0.1201	-5.25223	1.50271e-07	1.81723e-06
ENSMUSG00000001281	731.263	-0.294231	0.222257	-1.32383	0.185558	0.333877
ENSMUSG00000001348	171.43	-10.0552	1.51269	-6.64722	2.98676e-11	7.28023e-10
ENSMUSG00000001504	9058.61	0.0427147	0.131504	0.324817	0.745319	0.838283
ENSMUSG00000001918	1666.2	1.24797	0.218372	5.71489	1.09773e-08	1.72976e-07
ENSMUSG00000001948	2020.47	-0.494767	0.18514	-2.67239	0.00753134	0.0282425
ENSMUSG00000002028	1303.83	1.02588	0.248344	4.13087	3.61386e-05	0.000276354
ENSMUSG00000002043	2108.97	-0.667615	0.176238	-3.78815	0.000151775	0.00101184
ENSMUSG00000002083	202.739	-0.118157	0.444604	-0.265757	0.790426	0.869492
ENSMUSG00000002111	446.277	-6.0491	0.529427	-11.4257	3.11018e-30	3.46563e-28
ENSMUSG00000002265	949.071	1.17557	0.258445	4.54862	5.39995e-06	4.95525e-05
ENSMUSG00000002324	159.194	0.551538	0.483004	1.14189	0.253499	0.420253
ENSMUSG00000002409	885.983	-0.451267	0.204678	-2.20477	0.0274702	0.0786647
ENSMUSG00000002731	898.006	-0.543904	0.216604	-2.51105	0.0120373	0.0412708
ENSMUSG00000002804	2431.07	-0.698808	0.167818	-4.16408	3.12607e-05	0.000242621
ENSMUSG00000002944	1845.49	-9.3863	1.22083	-7.68845	1.48928e-14	7.26023e-13
ENSMUSG00000003123	611.377	-0.884058	0.345899	-2.55583	0.0105935	0.0370869
ENSMUSG00000003206	54.065	-2.51814	0.766039	-3.28722	0.00101181	0.00529673
ENSMUSG00000003283	248.43	-5.72309	1.36169	-4.20293	2.63478e-05	0.000206986
ENSMUSG00000003354	7304.01	0.581908	0.145939	3.98735	6.68167e-05	0.000477225
ENSMUSG00000003355	1798.3	-0.0850358	0.24646	-0.345029	0.730072	0.827097
ENSMUSG00000003657	23669.7	-0.142014	0.169514	-0.83777	0.40216	0.572128
ENSMUSG00000003812	2214.44	-0.638748	0.201268	-3.17361	0.00150554	0.00745601
ENSMUSG00000003863	307.715	0.583064	0.323972	1.79974	0.0719025	0.164953
ENSMUSG00000003872	203.413	0.00321214	0.429213	0.00748379	0.994029	0.995944
ENSMUSG00000004018	1200.25	0.162974	0.211165	0.771782	0.440243	0.59772
ENSMUSG00000004035	6879.31	-0.2346	0.207706	-1.12948	0.258696	0.427054
ENSMUSG00000004231	320.193	0.24631	0.353266	0.697236	0.485655	0.633467
ENSMUSG00000004267	5844.91	-0.0764274	0.236835	-0.322703	0.74692	0.838873
ENSMUSG00000004561	414.72	0.0324061	0.335271	0.0966563	0.922999	0.953562
ENSMUSG00000004633	1298.68	-0.176416	0.367925	-0.479489	0.631591	0.750977
ENSMUSG00000004709	58.0829	-8.49684	1.63468	-5.19788	2.01578e-07	2.40047e-06
ENSMUSG00000004730	566.855	-7.07884	1.33675	-5.29556	1.18653e-07	1.45747e-06
ENSMUSG00000004748	321.248	0.0257825	0.399546	0.0645294	0.948549	0.969683
ENSMUSG00000004933	707.026	0.85461	0.284855	3.00015	0.00269844	0.0124176
ENSMUSG00000005045	538.497	0.826639	0.320846	2.57644	0.00998246	0.035473
ENSMUSG00000005357	25.9916	-1.65733	0.999866	-1.65755	0.0974077	0.206904
ENSMUSG00000005547	742.961	0.704666	0.211123	3.3377	0.000844736	0.00448227
ENSMUSG00000005580	634.339	0.982278	0.215059	4.56749	4.93606e-06	4.55636e-05
ENSMUSG00000005687	6683.48	-0.518732	0.165008	-3.14367	0.00166843	0.00821059
ENSMUSG00000005716	4583.62	-0.494241	0.18542	-2.66551	0.00768705	0.0287573
ENSMUSG00000005968	4370.77	0.22756	0.16369	1.39019	0.16447	0.30262
ENSMUSG00000006005	3061.49	1.24642	0.228584	5.45281	4.95813e-08	6.84485e-07
ENSMUSG00000006288	2553.12	-0.332315	0.207633	-1.60049	0.109489	0.225334
ENSMUSG00000006586	636.204	-0.206902	0.273092	-0.757629	0.448673	0.603875
ENSMUSG00000006651	11734.5	0.166544	0.176505	0.943566	0.345392	0.519086
ENSMUSG00000006711	318.224	1.42027	0.299895	4.7359	2.18085e-06	2.11312e-05
ENSMUSG00000006717	3259.06	-0.500187	0.179461	-2.78716	0.00531722	0.0216576
ENSMUSG00000006777	1872.34	-0.578958	0.167563	-3.45517	0.00054995	0.00316577
ENSMUSG00000006784	964.884	0.559264	0.265257	2.10838	0.034998	0.0952825
ENSMUSG00000006850	897.342	0.16921	0.245008	0.690629	0.489798	0.637269
ENSMUSG00000007646	287.184	0.662395	0.374902	1.76685	0.0772532	0.174913
ENSMUSG00000007827	1171.89	0.901008	0.264698	3.40391	0.000664297	0.00370108
ENSMUSG00000007850	8395.83	0.386928	0.175669	2.20259	0.0276234	0.0789239
ENSMUSG00000007867	3167.25	-0.4893	0.14492	-3.37634	0.000734576	0.00402084
ENSMUSG00000008153	1183.63	1.30395	0.329497	3.95739	7.57735e-05	0.000535694
ENSMUSG00000008822	1118.6	-0.550149	0.199351	-2.7597	0.00578538	0.0229649
ENSMUSG00000009070	651.332	0.0673295	0.258468	0.260495	0.794482	0.872811
ENSMUSG00000009075	2113.75	0.4896	0.203538	2.40545	0.0161525	0.0529369
ENSMUSG00000009733	1204.58	-0.0661133	0.265043	-0.249444	0.803017	0.879093
ENSMUSG00000009734	236.276	0.906515	0.476212	1.9036	0.0569629	0.139501
ENSMUSG00000010044	1443.98	0.392598	0.207607	1.89107	0.0586154	0.141111
ENSMUSG00000010057	1308.08	0.130621	0.228233	0.572313	0.56711	0.699087
ENSMUSG00000010066	215.251	0.953055	0.49048	1.94311	0.0520029	0.129385
ENSMUSG00000010136	8024.67	-0.305097	0.185075	-1.64851	0.0992484	0.20919
ENSMUSG00000010362	1904.97	-0.27274	0.178447	-1.52841	0.126412	0.252824
ENSMUSG00000010505	207.202	0.753995	0.489527	1.54025	0.123499	0.247633
ENSMUSG00000010825	101.732	0.601973	0.821339	0.732917	0.463609	0.613427
ENSMUSG00000011154	7387.7	-0.352423	0.18698	-1.88481	0.059455	0.142602
ENSMUSG00000011305	402.323	-0.155621	0.437464	-0.355735	0.722039	0.821776
ENSMUSG00000011658	981.61	0.192906	0.203697	0.947023	0.343627	0.516932
ENSMUSG00000012126	2490.43	0.0441959	0.227309	0.194431	0.845838	0.907817
ENSMUSG00000012187	1440.72	-0.466181	0.227698	-2.04736	0.0406228	0.107228
ENSMUSG00000012296	8199.28	0.695043	0.172302	4.03386	5.48676e-05	0.000397989
ENSMUSG00000012483	720.173	-0.815904	0.320408	-2.54645	0.0108825	0.0378099
ENSMUSG00000012819	828.456	1.81557	0.240361	7.55351	4.23673e-14	1.88837e-12
ENSMUSG00000013155	436.347	0.450881	0.263117	1.71361	0.0866003	0.191355
ENSMUSG00000014075	2497.42	-0.378696	0.147861	-2.56117	0.010432	0.0367358
ENSMUSG00000014232	1063.08	0.114354	0.195968	0.583532	0.559535	0.693859
ENSMUSG00000014773	1795.43	1.51107	0.211821	7.13372	9.76912e-13	3.32296e-11
ENSMUSG00000015013	4470.86	-0.496651	0.143284	-3.46619	0.00052789	0.00305003
ENSMUSG00000015337	906.511	-0.283611	0.259442	-1.09316	0.274325	0.442094
ENSMUSG00000015340	480.568	-5.95323	0.617625	-9.63889	5.47747e-22	4.27243e-20
ENSMUSG00000015355	376.625	-6.48506	1.34885	-4.80786	1.52554e-06	1.52554e-05
ENSMUSG00000015474	994.792	0.516115	0.219752	2.34862	0.018843	0.0587901
ENSMUSG00000015568	1741.41	-7.85929	1.62292	-4.84269	1.28091e-06	1.31462e-05
ENSMUSG00000015652	225.016	1.02113	0.351481	2.90522	0.00366994	0.0159919
ENSMUSG00000015745	2552.32	-0.357107	0.153146	-2.3318	0.019711	0.0606493
ENSMUSG00000015749	11088.8	-0.148691	0.198087	-0.750632	0.452874	0.605202
ENSMUSG00000015852	276.339	-10.7457	1.55822	-6.89613	5.34391e-12	1.63461e-10
ENSMUSG00000015943	2706.96	-0.387181	0.204655	-1.89187	0.0585081	0.141111
ENSMUSG00000015947	1237.46	-12.9071	1.47057	-8.77692	1.68014e-18	1.04841e-16
ENSMUSG00000015950	291.96	-1.33693	0.529879	-2.52308	0.0116334	0.0400619
ENSMUSG00000015980	2301.21	-0.2685	0.241329	-1.11259	0.265886	0.434486
ENSMUSG00000016028	632.047	1.22216	0.271269	4.50534	6.62682e-06	5.95279e-05
ENSMUSG00000016200	2615.8	0.144552	0.146569	0.986238	0.324016	0.497357
ENSMUSG00000016493	21.6667	2.69997	1.48496	1.81821	0.0690318	0.159983
ENSMUSG00000016637	3492.68	-0.242318	0.169244	-1.43177	0.15221	0.286427
ENSMUSG00000016763	11.5136	1.67499	1.89006	0.886214	0.375502	0.547973
ENSMUSG00000017740	123.51	2.02366	0.590323	3.42806	0.000607922	0.00344858
ENSMUSG00000017760	6149.56	-0.402786	0.205117	-1.96369	0.049566	0.125321
ENSMUSG00000017929	8372.87	0.497232	0.13732	3.62097	0.000293496	0.00183141
ENSMUSG00000017943	923.4	-0.472038	0.206153	-2.28975	0.0220358	0.0664911
ENSMUSG00000017969	4286.38	-0.350367	0.170436	-2.05571	0.0398104	0.105619
ENSMUSG00000018102	2299.18	-0.728089	0.16843	-4.3228	1.5406e-05	0.00012991
ENSMUSG00000018126	341.3	0.0743454	0.335436	0.221638	0.824596	0.89705
ENSMUSG00000018322	5389.79	0.221387	0.198107	1.11751	0.263776	0.432692
ENSMUSG00000018395	6185.01	0.129847	0.175415	0.740229	0.459161	0.610115
ENSMUSG00000018411	3148.95	0.177773	0.199848	0.889539	0.373713	0.547387
ENSMUSG00000018476	1354.44	0.942031	0.269755	3.49217	0.000479114	0.00279932
ENSMUSG00000018509	1312.12	-0.629712	0.219692	-2.86634	0.00415249	0.0177964
ENSMUSG00000018648	6086.74	-0.215465	0.146588	-1.46987	0.141597	0.273233
ENSMUSG00000018707	2526.58	1.41565	0.226926	6.23837	4.42147e-10	8.84294e-09
ENSMUSG00000018800	3499.22	1.29914	0.197933	6.56354	5.25451e-11	1.24198e-09
ENSMUSG00000018830	46.8513	-2.41461	1.27302	-1.89676	0.0578592	0.140492
ENSMUSG00000018865	2985.98	-0.389933	0.15734	-2.47829	0.0132015	0.0446731
ENSMUSG00000018924	96.5604	0.144646	0.539644	0.268039	0.788669	0.86826
ENSMUSG00000018930	1169.96	-7.47874	1.55335	-4.8146	1.47493e-06	1.48444e-05
ENSMUSG00000019039	2080.6	-0.105702	0.231607	-0.456386	0.648112	0.764792
ENSMUSG00000019122	814.909	-7.03371	0.481753	-14.6002	2.79904e-48	6.23787e-46
ENSMUSG00000019178	146.501	0.958914	0.578001	1.65902	0.0971126	0.206904
ENSMUSG00000019210	8802.51	-0.733193	0.163429	-4.48631	7.24689e-06	6.46009e-05
ENSMUSG00000019235	762.833	0.357492	0.253594	1.4097	0.158629	0.294596
ENSMUSG00000019302	8543.78	0.297876	0.178474	1.66902	0.0951138	0.204377
ENSMUSG00000019732	134.952	-0.433543	0.647757	-0.669299	0.503305	0.648889
ENSMUSG00000019737	13407	0.233559	0.122846	1.90123	0.0572715	0.140037
ENSMUSG00000019787	1358.37	0.142527	0.283687	0.502408	0.61538	0.737889
ENSMUSG00000019796	2678.94	-0.0443293	0.211938	-0.209162	0.834322	0.90144
ENSMUSG00000019831	2062.38	0.122708	0.18159	0.675739	0.499206	0.646275
ENSMUSG00000019848	3337.25	-0.086061	0.169078	-0.509	0.610752	0.733467
ENSMUSG00000019853	6194.39	-0.786208	0.13823	-5.68769	1.28772e-08	1.91319e-07
ENSMUSG00000019856	614.303	0.245533	0.315813	0.777462	0.436886	0.596132
ENSMUSG00000019876	142.276	-9.78607	1.53568	-6.37248	1.85993e-10	3.92093e-09
ENSMUSG00000019892	1264.64	0.658925	0.332717	1.98044	0.0476543	0.121671
ENSMUSG00000019923	18150.8	-0.0833003	0.169265	-0.49213	0.622627	0.74429
ENSMUSG00000019935	4158.84	0.44222	0.26859	1.64645	0.0996714	0.209552
ENSMUSG00000019944	1095.34	0.159605	0.232289	0.687096	0.492022	0.639096
ENSMUSG00000019945	1000.18	-0.29575	0.249806	-1.18392	0.236446	0.401803
ENSMUSG00000019971	1667.94	0.976436	0.248682	3.92644	8.62106e-05	0.000605804
ENSMUSG00000019986	1119.3	0.957912	0.242079	3.95702	7.589e-05	0.000535694
ENSMUSG00000019987	439.228	-5.49365	0.610763	-8.99473	2.36804e-19	1.67916e-17
ENSMUSG00000020014	623.493	1.01423	0.352447	2.87768	0.00400616	0.0172197
ENSMUSG00000020102	107.838	1.62582	0.750799	2.16545	0.0303531	0.0847064
ENSMUSG00000020175	1947.31	0.299929	0.348642	0.860276	0.389637	0.559653
ENSMUSG00000020182	948.513	-0.477761	0.775854	-0.615788	0.538035	0.675792
ENSMUSG00000020220	606.162	1.1656	0.315247	3.69742	0.000217805	0.00139252
ENSMUSG00000020297	2445.17	0.356273	0.228567	1.55872	0.119062	0.241216
ENSMUSG00000020319	829.761	-0.206466	0.251326	-0.821508	0.411357	0.578123
ENSMUSG00000020321	19704	-0.126396	0.152502	-0.828813	0.40721	0.574855
ENSMUSG00000020390	7908.2	-0.496249	0.170652	-2.90796	0.00363795	0.0158969
ENSMUSG00000020435	679.743	0.30382	0.235933	1.28774	0.197837	0.350313
ENSMUSG00000020462	6833.47	-0.635441	0.139846	-4.54385	5.52359e-06	5.03907e-05
ENSMUSG00000020486	1112.11	0.421708	0.224571	1.87784	0.0604036	0.144303
ENSMUSG00000020515	6235.49	-0.125932	0.212665	-0.592163	0.553741	0.689965
ENSMUSG00000020562	1968.78	-0.298946	0.270031	-1.10708	0.268259	0.436675
ENSMUSG00000020576	6311.69	0.399971	0.170495	2.34594	0.0189793	0.0589898
ENSMUSG00000020577	47600.9	0.392781	0.155164	2.53139	0.0113611	0.0392979
ENSMUSG00000020599	522.766	-0.409556	0.331758	-1.2345	0.217016	0.376453
ENSMUSG00000020621	2863.27	-0.476071	0.201942	-2.35746	0.0184005	0.0577579
ENSMUSG00000020686	320.406	-0.115477	0.391206	-0.295183	0.767854	0.85622
ENSMUSG00000020752	566.495	1.51326	0.285924	5.29254	1.20632e-07	1.4702e-06
ENSMUSG00000020798	258.021	0.30955	0.381144	0.812159	0.4167	0.579194
ENSMUSG00000020799	9131.44	0.107788	0.147928	0.72865	0.466216	0.61531
ENSMUSG00000020801	2593.2	-0.0230722	0.212119	-0.10877	0.913385	0.947394
ENSMUSG00000020810	1405	-0.233135	0.215042	-1.08414	0.278305	0.447122
ENSMUSG00000020836	255.113	0.432577	0.420203	1.02945	0.303269	0.474047
ENSMUSG00000020847	3417.26	-0.544837	0.174023	-3.13082	0.00174316	0.00855135
ENSMUSG00000020878	2161.7	-0.0426883	0.219979	-0.194056	0.846132	0.907817
ENSMUSG00000020895	2898.62	0.0201909	0.196762	0.102616	0.918268	0.949932
ENSMUSG00000020904	4329.79	-0.0294252	0.197933	-0.148663	0.88182	0.925733
ENSMUSG00000020921	2069.07	0.607285	0.203543	2.98357	0.00284908	0.0129579
ENSMUSG00000020926	8247.02	0.748992	0.190877	3.92396	8.71067e-05	0.000609356
ENSMUSG00000020930	1565.29	0.0682994	0.187725	0.363827	0.715987	0.818871
ENSMUSG00000020937	1490.34	0.621825	0.224623	2.7683	0.00563489	0.0225396
ENSMUSG00000020941	279.504	-0.023723	0.47743	-0.049689	0.96037	0.974108
ENSMUSG00000020990	257.5	-0.050737	0.424578	-0.1195	0.904879	0.942331
ENSMUSG00000020992	43.1146	-0.146199	0.76824	-0.190304	0.849071	0.909719
ENSMUSG00000021061	1301.48	-0.860939	0.317153	-2.71458	0.00663595	0.0255607
ENSMUSG00000021068	4324.84	-0.432714	0.155403	-2.78446	0.00536167	0.0217818
ENSMUSG00000021071	592.167	0.397056	0.298356	1.33081	0.183252	0.330871
ENSMUSG00000021090	515.88	-0.811086	0.349073	-2.32354	0.02015	0.0615824
ENSMUSG00000021123	2711.27	0.440771	0.19279	2.28627	0.0222384	0.0669727
ENSMUSG00000021134	12082.9	0.642846	0.19113	3.3634	0.000769882	0.00415842
ENSMUSG00000021188	3763.9	-1.08812	0.352061	-3.09071	0.00199679	0.00952597
ENSMUSG00000021190	22634.1	0.443296	0.160835	2.75622	0.00584735	0.023152
ENSMUSG00000021194	1515.62	0.823807	0.172197	4.78409	1.71761e-06	1.69587e-05
ENSMUSG00000021198	113.407	0.939614	0.656104	1.43211	0.152112	0.286427
ENSMUSG00000021200	160.714	0.239931	0.482138	0.497639	0.618739	0.740777
ENSMUSG00000021221	408.166	-0.308914	0.347157	-0.889837	0.373553	0.547387
ENSMUSG00000021234	244.327	-1.16408	0.375323	-3.10155	0.00192512	0.00929779
ENSMUSG00000021240	508.561	-0.176021	0.288839	-0.60941	0.542253	0.679449
ENSMUSG00000021259	235.586	0.0955665	0.378162	0.252713	0.80049	0.877557
ENSMUSG00000021262	5464.01	-0.354919	0.147839	-2.40071	0.0163632	0.0532625
ENSMUSG00000021270	47678.8	0.287776	0.216061	1.33192	0.182885	0.330838
ENSMUSG00000021290	19245.6	-0.682779	0.140299	-4.8666	1.13533e-06	1.17293e-05
ENSMUSG00000021313	296.173	1.2303	0.745762	1.64972	0.0990006	0.20919
ENSMUSG00000021368	3744.04	-0.214161	0.157997	-1.35548	0.175265	0.320156
ENSMUSG00000021379	16355.1	0.176828	0.221751	0.797416	0.425209	0.586769
ENSMUSG00000021423	496.711	-7.06158	1.29659	-5.44626	5.14394e-08	7.03907e-07
ENSMUSG00000021495	349.798	1.06418	0.304238	3.49786	0.000469013	0.0027506
ENSMUSG00000021497	7746.51	0.00852053	0.145759	0.0584562	0.953385	0.970237
ENSMUSG00000021508	26163.4	-0.105558	0.166175	-0.635222	0.525283	0.665132
ENSMUSG00000021534	595.465	-0.105048	0.342418	-0.306785	0.759007	0.848174
ENSMUSG00000021573	805.369	-0.11646	0.319054	-0.365018	0.715098	0.818871
ENSMUSG00000021594	1513.2	-0.418066	0.203653	-2.05283	0.0400886	0.105997
ENSMUSG00000021597	961.2	-0.106813	0.290632	-0.367519	0.713232	0.818119
ENSMUSG00000021640	15.7711	5.47466	2.20893	2.47842	0.0131964	0.0446731
ENSMUSG00000021643	1612.5	-0.789707	0.175299	-4.50492	6.63965e-06	5.95279e-05
ENSMUSG00000021647	1173.38	-0.066722	0.285668	-0.233565	0.815323	0.889443
ENSMUSG00000021662	3152.47	0.338698	0.15399	2.19948	0.0278435	0.0794074
ENSMUSG00000021690	1996.81	-0.246293	0.211125	-1.16657	0.243383	0.409576
ENSMUSG00000021700	195.976	0.429081	0.387891	1.10619	0.268644	0.436675
ENSMUSG00000021728	3754.23	-0.00516674	0.195051	-0.0264891	0.978867	0.986272
ENSMUSG00000021730	5605.09	-0.193176	0.172413	-1.12042	0.262533	0.432016
ENSMUSG00000021747	392.775	-0.443707	0.400243	-1.10859	0.267606	0.436675
ENSMUSG00000021772	1492.08	-0.371044	0.224987	-1.64918	0.0991102	0.20919
ENSMUSG00000021790	161.384	-0.10565	0.453956	-0.232731	0.81597	0.889527
ENSMUSG00000021791	795.146	-0.31468	0.220572	-1.42666	0.153679	0.287802
ENSMUSG00000021798	1627.03	0.313087	0.186836	1.67573	0.0937909	0.203214
ENSMUSG00000021803	360.559	1.09772	0.487197	2.25312	0.0242513	0.0713813
ENSMUSG00000021811	2541.05	-0.304457	0.214075	-1.4222	0.154969	0.288832
ENSMUSG00000021815	628.662	0.228095	0.303777	0.750862	0.452736	0.605202
ENSMUSG00000021886	110.103	-9.41585	1.52446	-6.1765	6.5538e-10	1.24682e-08
ENSMUSG00000021913	1184.32	0.609986	0.268048	2.27566	0.0228664	0.0683363
ENSMUSG00000021998	719.302	-8.0329	1.07796	-7.45196	9.19619e-14	3.87731e-12
ENSMUSG00000022000	1882.71	1.18693	0.251245	4.7242	2.31024e-06	2.19755e-05
ENSMUSG00000022014	97.7031	-9.24243	1.58505	-5.83099	5.50995e-09	9.2425e-08
ENSMUSG00000022026	1113.33	0.0114502	0.441682	0.025924	0.979318	0.986272
ENSMUSG00000022054	12086.2	-0.351468	0.162958	-2.1568	0.031021	0.0861082
ENSMUSG00000022055	7059.66	-0.0297004	0.149849	-0.198202	0.842887	0.907817
ENSMUSG00000022123	142.592	1.33765	0.605303	2.20989	0.0271129	0.0780455
ENSMUSG00000022148	154.97	-3.19705	0.602384	-5.30732	1.11248e-07	1.38837e-06
ENSMUSG00000022151	3181.81	-0.379781	0.172809	-2.19769	0.0279712	0.079626
ENSMUSG00000022176	828.993	-0.429812	0.243763	-1.76324	0.0778603	0.175407
ENSMUSG00000022177	303.03	-0.31692	0.383565	-0.826248	0.408663	0.574855
ENSMUSG00000022194	515.279	1.45334	0.338306	4.29592	1.73969e-05	0.000143594
ENSMUSG00000022225	89.5397	-9.11874	1.55623	-5.85952	4.6422e-09	7.87156e-08
ENSMUSG00000022236	193.199	0.284218	0.421405	0.674452	0.500024	0.646797
ENSMUSG00000022240	2476.65	0.0630495	0.165872	0.38011	0.703864	0.809755
ENSMUSG00000022244	1126.06	-0.114104	0.211725	-0.538928	0.589936	0.716758
ENSMUSG00000022245	2075.58	0.112207	0.175315	0.64003	0.522153	0.663321
ENSMUSG00000022262	1172.11	1.73147	0.348534	4.96788	6.7688e-07	7.33287e-06
ENSMUSG00000022324	252.477	1.12537	0.393819	2.85759	0.00426874	0.0182445
ENSMUSG00000022340	1411.1	0.355347	0.212709	1.67058	0.0948047	0.204275
ENSMUSG00000022358	15468.2	-0.134856	0.16308	-0.826935	0.408274	0.574855
ENSMUSG00000022375	759.406	-0.145505	0.254389	-0.571979	0.567336	0.699087
ENSMUSG00000022431	269.027	0.40899	0.39088	1.04633	0.295407	0.46564
ENSMUSG00000022441	635.561	0.218783	0.340576	0.64239	0.52062	0.662194
ENSMUSG00000022466	2373.96	0.160172	0.183479	0.872974	0.382677	0.552756
ENSMUSG00000022523	615.141	-0.245095	0.300709	-0.815058	0.415039	0.579194
ENSMUSG00000022525	989.508	-0.403728	0.241319	-1.673	0.0943264	0.20409
ENSMUSG00000022540	2768.93	-0.230347	0.177675	-1.29645	0.194819	0.345755
ENSMUSG00000022577	353.774	0.363332	0.287214	1.26502	0.205863	0.360943
ENSMUSG00000022580	2596.68	0.325953	0.179353	1.81739	0.0691579	0.159983
ENSMUSG00000022619	424.413	-0.384228	0.360589	-1.06556	0.286624	0.457131
ENSMUSG00000022621	2620.49	0.214862	0.268644	0.799802	0.423826	0.586142
ENSMUSG00000022629	5424.58	0.0322655	0.201303	0.160283	0.872658	0.920028
ENSMUSG00000022657	195.795	-0.161776	0.460916	-0.350987	0.725598	0.824145
ENSMUSG00000022701	1255.9	0.817274	0.30481	2.68126	0.00733461	0.0277046
ENSMUSG00000022722	3081.97	-0.397399	0.209222	-1.89942	0.0575097	0.140399
ENSMUSG00000022742	1791.72	-0.328715	0.204417	-1.60806	0.107822	0.223079
ENSMUSG00000022756	3487.53	1.15571	0.178215	6.48488	8.8801e-11	2.0676e-09
ENSMUSG00000022783	2550.3	0.127972	0.236503	0.541099	0.588439	0.716601
ENSMUSG00000022805	1283.26	0.39776	0.196307	2.02622	0.0427427	0.112065
ENSMUSG00000022831	222.747	-10.4322	1.49232	-6.99061	2.73695e-12	8.89509e-11
ENSMUSG00000022856	4064.81	0.424468	0.22938	1.8505	0.0642411	0.151384
ENSMUSG00000022861	639.9	-0.289864	0.219854	-1.31844	0.187357	0.33595
ENSMUSG00000022871	158.028	1.15213	0.468812	2.45755	0.0139888	0.0468295
ENSMUSG00000022960	1196.87	0.312749	0.208651	1.49891	0.133896	0.262535
ENSMUSG00000022972	5878.38	-0.602934	0.15855	-3.8028	0.000143072	0.000962038
ENSMUSG00000023017	1899.14	0.406908	0.221202	1.83953	0.065837	0.154445
ENSMUSG00000023033	268.689	1.05137	0.380687	2.76178	0.00574879	0.0228778
ENSMUSG00000023094	613.047	-0.874145	0.255294	-3.42407	0.000616906	0.00347427
ENSMUSG00000023236	13986.3	0.443073	0.122416	3.61941	0.000295277	0.00183519
ENSMUSG00000023272	8261.11	0.188146	0.153792	1.22338	0.221187	0.382117
ENSMUSG00000023277	10387.8	-0.107407	0.152764	-0.70309	0.482	0.630805
ENSMUSG00000023473	383.159	1.84989	0.34309	5.39186	6.97302e-08	9.21857e-07
ENSMUSG00000023827	3505.52	0.2768	0.184302	1.50188	0.133127	0.261704
ENSMUSG00000023868	250.509	1.23425	0.558062	2.21167	0.0269894	0.0779695
ENSMUSG00000023931	444.199	0.0202405	0.346693	0.0583817	0.953445	0.970237
ENSMUSG00000023961	3917.77	0.020527	0.20274	0.101248	0.919354	0.950425
ENSMUSG00000023966	5489.57	0.0917594	0.215625	0.42555	0.670436	0.780507
ENSMUSG00000023968	3203.36	0.177846	0.182788	0.972961	0.330573	0.503115
ENSMUSG00000023978	1850.14	0.281264	0.221024	1.27255	0.203179	0.358145
ENSMUSG00000023992	828.867	-8.28815	0.65149	-12.7218	4.47166e-37	6.97579e-35
ENSMUSG00000024019	298.938	0.505984	0.355415	1.42364	0.15455	0.28851
ENSMUSG00000024033	7485.92	-0.516287	0.160021	-3.22636	0.00125374	0.0063501
ENSMUSG00000024052	6265.76	-0.113645	0.172937	-0.657146	0.511087	0.653541
ENSMUSG00000024059	2184.18	0.194098	0.193312	1.00406	0.315348	0.488214
ENSMUSG00000024084	2278.24	-0.147617	0.217283	-0.679379	0.496898	0.644357
ENSMUSG00000024155	118.92	-0.289203	0.518813	-0.557432	0.577232	0.707067
ENSMUSG00000024158	5267.1	-0.472184	0.183571	-2.57222	0.010105	0.0358268
ENSMUSG00000024175	1199.76	0.0364232	0.202528	0.179843	0.857275	0.914452
ENSMUSG00000024186	814.742	1.31774	0.294981	4.46722	7.92424e-06	7.02376e-05
ENSMUSG00000024227	1809.6	-0.065603	0.19601	-0.334693	0.737857	0.833495
ENSMUSG00000024253	2666.41	-0.286942	0.18906	-1.51773	0.129083	0.256522
ENSMUSG00000024378	1139.01	-0.68593	0.350228	-1.95852	0.0501687	0.126639
ENSMUSG00000024397	813.733	-12.3018	1.47085	-8.36373	6.07679e-17	3.51104e-15
ENSMUSG00000024497	9525.75	0.156274	0.190928	0.818497	0.413073	0.578864
ENSMUSG00000024502	19.3205	0.97292	1.56866	0.620225	0.53511	0.673931
ENSMUSG00000024517	160.043	-0.950338	0.490314	-1.93822	0.0525961	0.130445
ENSMUSG00000024524	379.485	0.0971499	0.352684	0.275459	0.782964	0.865031
ENSMUSG00000024601	5974.05	-0.725007	0.210105	-3.45069	0.000559157	0.00319518
ENSMUSG00000024610	4649.41	-6.6904	0.330723	-20.2296	5.37365e-91	4.19145e-88
ENSMUSG00000024672	1249.01	-8.2228	1.32418	-6.20974	5.30736e-10	1.03494e-08
ENSMUSG00000024675	271.945	-10.7217	1.48133	-7.23792	4.55605e-13	1.73352e-11
ENSMUSG00000024679	651.781	-6.81477	1.55635	-4.37868	1.19402e-05	0.00010291
ENSMUSG00000024696	309.244	-5.32168	0.54726	-9.72423	2.37706e-22	1.95169e-20
ENSMUSG00000024713	1312.84	1.17633	0.246726	4.76776	1.86281e-06	1.82766e-05
ENSMUSG00000024725	6581.76	-0.439212	0.176904	-2.48278	0.0130363	0.0443064
ENSMUSG00000024749	8937.68	0.913146	0.214433	4.25843	2.0587e-05	0.000167269
ENSMUSG00000024786	83.1312	-0.514636	0.77849	-0.661069	0.508568	0.652716
ENSMUSG00000024799	1561.05	0.61757	0.258863	2.3857	0.0170467	0.0547177
ENSMUSG00000024857	53130.3	-0.241056	0.150258	-1.60428	0.108652	0.224203
ENSMUSG00000024873	257.735	-0.40924	0.330729	-1.23739	0.215943	0.375135
ENSMUSG00000024885	531.33	-1.09557	0.416395	-2.63108	0.00851132	0.0312415
ENSMUSG00000024897	13794	0.44685	0.160551	2.78323	0.00538212	0.0218081
ENSMUSG00000025044	1465.19	-7.60947	1.61063	-4.72454	2.3064e-06	2.19755e-05
ENSMUSG00000025058	65.0566	-8.65966	1.61121	-5.37464	7.6734e-08	1.00593e-06
ENSMUSG00000025060	14131.7	-0.151573	0.181501	-0.83511	0.403656	0.572932
ENSMUSG00000025129	9472.75	0.365761	0.15239	2.40016	0.0163878	0.0532625
ENSMUSG00000025170	236.539	-0.850411	0.451287	-1.88442	0.0595088	0.142602
ENSMUSG00000025175	564.948	-0.388485	0.270672	-1.43526	0.151213	0.285238
ENSMUSG00000025219	87.5275	0.224956	0.497324	0.452333	0.651029	0.767074
ENSMUSG00000025257	287.128	-0.365746	0.376303	-0.971944	0.331078	0.503394
ENSMUSG00000025380	6482.26	-0.118239	0.15389	-0.76834	0.442285	0.598409
ENSMUSG00000025420	720.854	0.260271	0.310165	0.839135	0.401393	0.572128
ENSMUSG00000025475	617.288	0.259021	0.333163	0.77746	0.436887	0.596132
ENSMUSG00000025488	362.682	-0.509206	0.307395	-1.65652	0.0976165	0.206905
ENSMUSG00000025576	826.221	0.340708	0.272	1.2526	0.210351	0.367466
ENSMUSG00000025578	434.224	0.0181196	0.248077	0.0730404	0.941774	0.966412
ENSMUSG00000025716	171.319	-0.770021	0.550503	-1.39876	0.161886	0.299327
ENSMUSG00000025723	245.98	-0.913397	0.402995	-2.26652	0.0234196	0.0695897
ENSMUSG00000025738	479.218	0.115477	0.283448	0.407402	0.683713	0.792416
ENSMUSG00000025757	8079.05	-0.106541	0.135439	-0.786634	0.431496	0.59307
ENSMUSG00000025777	1495.59	-0.543377	0.198523	-2.73709	0.00619851	0.0241746
ENSMUSG00000025867	1035.57	-0.0257429	0.207439	-0.124098	0.901237	0.939793
ENSMUSG00000025877	222.005	-5.35026	1.41701	-3.77575	0.000159526	0.0010545
ENSMUSG00000025888	73.0563	-8.82515	1.61718	-5.45712	4.83931e-08	6.74046e-07
ENSMUSG00000025893	496.033	-0.743457	0.265276	-2.80258	0.00506958	0.0209776
ENSMUSG00000025916	346.716	0.303676	0.293892	1.03329	0.301467	0.472651
ENSMUSG00000025925	1239.18	-0.190045	0.236461	-0.803702	0.421569	0.584057
ENSMUSG00000025950	5506.95	-0.303717	0.213157	-1.42485	0.154201	0.288433
ENSMUSG00000025955	923.115	0.563547	0.189397	2.97548	0.00292526	0.0132657
ENSMUSG00000025963	513.99	-0.116377	0.362391	-0.321138	0.748106	0.838998
ENSMUSG00000026014	3058.86	0.0768673	0.146742	0.523826	0.6004	0.724941
ENSMUSG00000026018	2135.3	-0.199003	0.212943	-0.934535	0.350028	0.522138
ENSMUSG00000026023	2396.29	0.151106	0.194416	0.777231	0.437023	0.596132
ENSMUSG00000026058	305.145	-0.305426	0.38057	-0.802549	0.422235	0.58446
ENSMUSG00000026102	2652.03	-0.19632	0.22311	-0.879922	0.378902	0.550341
ENSMUSG00000026131	2570.24	1.24759	0.185003	6.74364	1.54464e-11	4.01607e-10
ENSMUSG00000026154	1565.82	-0.683003	0.192863	-3.54139	0.000398025	0.00236992
ENSMUSG00000026204	87.0133	1.60156	0.606554	2.64042	0.00828024	0.0305371
ENSMUSG00000026273	1020.74	0.0582511	0.236279	0.246535	0.805268	0.880938
ENSMUSG00000026301	923.049	0.256278	0.257248	0.996231	0.319138	0.491951
ENSMUSG00000026308	77.6286	1.65813	0.936126	1.77127	0.0765158	0.173748
ENSMUSG00000026358	233.703	-6.27422	0.726595	-8.63511	5.8672e-18	3.52032e-16
ENSMUSG00000026395	207.964	-6.91219	0.911158	-7.58616	3.29517e-14	1.5119e-12
ENSMUSG00000026429	184.862	-0.725412	0.382397	-1.89701	0.0578263	0.140492
ENSMUSG00000026452	1618.92	-0.0310406	0.197527	-0.157146	0.87513	0.921811
ENSMUSG00000026463	437.85	0.973801	0.347964	2.79857	0.00513296	0.0211836
ENSMUSG00000026489	427.022	0.519631	0.446464	1.16388	0.244472	0.410081
ENSMUSG00000026514	441.405	-0.307636	0.308773	-0.996319	0.319095	0.491951
ENSMUSG00000026536	153.39	-9.8961	1.50538	-6.57381	4.90443e-11	1.17706e-09
ENSMUSG00000026544	411.302	-0.911373	0.273537	-3.33181	0.000862838	0.0045628
ENSMUSG00000026546	2616.81	0.158025	0.212195	0.744714	0.456445	0.607555
ENSMUSG00000026576	22871.2	0.300608	0.160682	1.87083	0.0613688	0.145938
ENSMUSG00000026578	3009.53	0.0306308	0.14659	0.208956	0.834483	0.90144
ENSMUSG00000026585	3913.04	0.759051	0.184571	4.11251	3.91379e-05	0.000293534
ENSMUSG00000026587	178.854	1.0761	0.457674	2.35123	0.0187115	0.0586143
ENSMUSG00000026609	621.07	1.92756	0.319141	6.03984	1.54268e-09	2.86497e-08
ENSMUSG00000026611	355.731	0.266303	0.363163	0.733289	0.463382	0.613427
ENSMUSG00000026622	6418.23	-0.127166	0.171338	-0.742189	0.457973	0.609069
ENSMUSG00000026640	1134.18	1.16439	0.239147	4.86893	1.12204e-06	1.16692e-05
ENSMUSG00000026644	28293.1	-0.416043	0.149717	-2.77887	0.00545484	0.0219885
ENSMUSG00000026649	6518.55	-0.0196672	0.223465	-0.0880103	0.929869	0.958121
ENSMUSG00000026650	1922.91	-0.867816	0.194679	-4.45768	8.28522e-06	7.30223e-05
ENSMUSG00000026656	182.995	-7.72433	1.20284	-6.42173	1.34737e-10	2.96042e-09
ENSMUSG00000026675	19232.3	-0.466129	0.156867	-2.9715	0.00296349	0.0134001
ENSMUSG00000026679	3480.52	-0.100903	0.179507	-0.562108	0.574042	0.705123
ENSMUSG00000026688	7003.69	-0.27055	0.14824	-1.82508	0.0679887	0.158302
ENSMUSG00000026754	1478.67	0.48309	0.190935	2.53012	0.0114023	0.039353
ENSMUSG00000026786	71.7846	-4.4994	0.822117	-5.47295	4.42604e-08	6.22038e-07
ENSMUSG00000026805	409.465	-0.0363207	0.278868	-0.130244	0.896374	0.935767
ENSMUSG00000026807	751.847	-0.00602006	0.420739	-0.0143083	0.988584	0.99304
ENSMUSG00000026809	242.013	-0.849169	0.440888	-1.92604	0.0540992	0.133115
ENSMUSG00000026817	3600.04	-0.281926	0.187275	-1.50541	0.13222	0.261423
ENSMUSG00000026819	10839.1	0.0495824	0.184315	0.26901	0.787922	0.86805
ENSMUSG00000026825	3762.01	0.428869	0.206412	2.07774	0.0377338	0.101142
ENSMUSG00000026831	1677.66	-0.111735	0.199307	-0.56062	0.575057	0.705813
ENSMUSG00000026851	3830.68	-0.630644	0.172337	-3.65937	0.000252838	0.00159687
ENSMUSG00000026894	895.602	-0.118818	0.265354	-0.447773	0.654317	0.769205
ENSMUSG00000026934	6428.04	0.0351903	0.187214	0.187969	0.850901	0.910253
ENSMUSG00000026980	867.808	1.58886	0.319568	4.9719	6.63003e-07	7.23276e-06
ENSMUSG00000026981	543.778	-11.7204	1.49879	-7.81992	5.2857e-15	2.6599e-13
ENSMUSG00000026988	3465.89	-0.216619	0.214228	-1.01116	0.311938	0.484685
ENSMUSG00000027022	9673.63	0.303096	0.12857	2.35745	0.0184011	0.0577579
ENSMUSG00000027075	836.25	0.679313	0.287188	2.36539	0.0180109	0.056992
ENSMUSG00000027107	3348.32	0.388289	0.251226	1.54558	0.122206	0.24599
ENSMUSG00000027160	1238.33	-0.524421	0.297001	-1.76572	0.0774427	0.175088
ENSMUSG00000027207	1027.13	-0.480214	0.283657	-1.69294	0.0904672	0.197937
ENSMUSG00000027220	2049.01	0.0860522	0.199258	0.431864	0.66584	0.777199
ENSMUSG00000027273	2790.83	-0.72297	0.248495	-2.90939	0.00362129	0.0158969
ENSMUSG00000027297	475.211	0.604477	0.29256	2.06616	0.0388132	0.103219
ENSMUSG00000027329	1215.07	0.0631181	0.226114	0.279143	0.780135	0.86277
ENSMUSG00000027344	289.32	0.530756	0.324501	1.63561	0.101921	0.212563
ENSMUSG00000027350	1200.81	0.894564	0.21789	4.10558	4.03297e-05	0.000299592
ENSMUSG00000027358	6711.99	0.0694088	0.158377	0.43825	0.661205	0.773719
ENSMUSG00000027378	2211.35	-0.717432	0.214291	-3.34793	0.000814171	0.00436463
ENSMUSG00000027387	669.266	0.293101	0.346137	0.846777	0.397119	0.567314
ENSMUSG00000027430	2568.04	-0.387013	0.162525	-2.38125	0.0172539	0.055156
ENSMUSG00000027438	1005.37	-0.0280223	0.266066	-0.105321	0.916121	0.94834
ENSMUSG00000027484	582.199	-0.023126	0.265435	-0.087125	0.930572	0.958213
ENSMUSG00000027581	2866.5	0.0536285	0.151152	0.354798	0.722741	0.821776
ENSMUSG00000027603	654.375	0.317723	0.270614	1.17408	0.240362	0.406687
ENSMUSG00000027605	8513.43	0.167683	0.221881	0.755732	0.44981	0.603875
ENSMUSG00000027606	2375.53	-0.0700789	0.218126	-0.321278	0.748	0.838998
ENSMUSG00000027676	890.405	-0.228443	0.217763	-1.04904	0.294158	0.465402
ENSMUSG00000027699	373.959	-0.557872	0.342869	-1.62707	0.103722	0.215454
ENSMUSG00000027702	558.714	-0.213659	0.277137	-0.770951	0.440736	0.597868
ENSMUSG00000027713	119.146	-0.351512	0.519787	-0.676262	0.498874	0.646275
ENSMUSG00000027778	1838.36	0.149893	0.19907	0.752968	0.451469	0.604542
ENSMUSG00000027827	5473.64	0.221436	0.216571	1.02246	0.306561	0.478236
ENSMUSG00000027834	476.135	0.89387	0.274676	3.25427	0.00113685	0.00585308
ENSMUSG00000027883	2044.04	0.0421796	0.154019	0.27386	0.784193	0.865163
ENSMUSG00000027886	289.002	-0.308287	0.494791	-0.623065	0.533242	0.67248
ENSMUSG00000027887	1195.02	0.432649	0.243483	1.77692	0.0755822	0.172129
ENSMUSG00000027939	32.366	2.75649	1.17891	2.33816	0.0193792	0.0598643
ENSMUSG00000027950	757.666	0.721309	0.300414	2.40105	0.0163483	0.0532625
ENSMUSG00000027952	2677.4	-0.513998	0.168554	-3.04945	0.00229261	0.0108051
ENSMUSG00000027994	1191.41	-0.14252	0.201385	-0.707697	0.479134	0.629433
ENSMUSG00000028080	1572.66	1.08179	0.262312	4.12406	3.72257e-05	0.000283279
ENSMUSG00000028086	4394.17	0.243425	0.182299	1.33531	0.181776	0.32935
ENSMUSG00000028104	1157.94	-0.732458	0.193333	-3.78858	0.000151511	0.00101184
ENSMUSG00000028106	873.424	1.04966	0.244733	4.28899	1.79488e-05	0.000147369
ENSMUSG00000028133	827.426	-0.271637	0.283999	-0.956472	0.338834	0.5112
ENSMUSG00000028139	52.7842	-0.249744	0.703707	-0.354898	0.722666	0.821776
ENSMUSG00000028222	1457.32	-0.953646	0.378458	-2.51982	0.0117416	0.0403454
ENSMUSG00000028229	512.271	-0.490708	0.251897	-1.94805	0.0514092	0.128729
ENSMUSG00000028238	118.728	-8.07602	1.58042	-5.11003	3.22101e-07	3.66772e-06
ENSMUSG00000028251	280.506	-0.409038	0.423193	-0.966551	0.333768	0.506134
ENSMUSG00000028294	2853.58	0.391577	0.189498	2.06639	0.0387915	0.103219
ENSMUSG00000028295	1536.58	-0.492017	0.250204	-1.96646	0.0492451	0.124958
ENSMUSG00000028300	2072.98	-0.311065	0.170167	-1.828	0.06755	0.157516
ENSMUSG00000028329	2056.66	0.0740577	0.19433	0.381093	0.703134	0.809513
ENSMUSG00000028386	28.4752	-0.964728	0.970381	-0.994174	0.320138	0.493007
ENSMUSG00000028391	1229.59	-0.353998	0.195447	-1.81123	0.0701057	0.161782
ENSMUSG00000028441	9944.6	-0.249874	0.164363	-1.52026	0.128447	0.255909
ENSMUSG00000028447	20845.7	-0.615824	0.127289	-4.83798	1.31165e-06	1.33737e-05
ENSMUSG00000028470	2479.98	-0.486011	0.16883	-2.8787	0.00399314	0.0172197
ENSMUSG00000028484	5359.73	0.110856	0.206886	0.535834	0.592073	0.718223
ENSMUSG00000028494	2963.63	-4.69261	0.284492	-16.4947	4.0046e-61	1.24944e-58
ENSMUSG00000028523	597.962	-0.450536	0.315635	-1.42739	0.153466	0.287802
ENSMUSG00000028546	141.005	-0.611527	0.719694	-0.849705	0.395489	0.566021
ENSMUSG00000028550	798.562	-0.789587	0.241358	-3.27143	0.00107003	0.00552732
ENSMUSG00000028573	430.417	-0.395321	0.260662	-1.5166	0.129367	0.256759
ENSMUSG00000028576	6231.14	-0.170226	0.193043	-0.8818	0.377885	0.549907
ENSMUSG00000028581	962.828	-5.52845	1.45231	-3.80667	0.000140848	0.000951184
ENSMUSG00000028589	2604.78	-0.264147	0.185571	-1.42343	0.154612	0.28851
ENSMUSG00000028610	451.978	0.30452	0.327349	0.930261	0.352236	0.523821
ENSMUSG00000028617	2708.63	-0.322121	0.172835	-1.86376	0.0623561	0.147611
ENSMUSG00000028637	1963.11	0.241195	0.175095	1.37751	0.168355	0.308618
ENSMUSG00000028730	313.594	0.0237725	0.442006	0.0537832	0.957108	0.972647
ENSMUSG00000028773	160.645	-0.636922	0.527757	-1.20685	0.227491	0.389556
ENSMUSG00000028782	727.8	1.09318	0.229571	4.76184	1.91832e-06	1.87037e-05
ENSMUSG00000028795	571.228	-0.71916	0.318472	-2.25816	0.0239357	0.0707192
ENSMUSG00000028803	1535.93	0.806973	0.23994	3.36323	0.000770374	0.00415842
ENSMUSG00000028804	14.8605	2.64519	1.80857	1.46259	0.14358	0.275503
ENSMUSG00000028845	1787.11	0.307111	0.175614	1.74879	0.0803278	0.179071
ENSMUSG00000028865	38842.9	0.23948	0.12647	1.89357	0.0582823	0.140962
ENSMUSG00000028931	1428.53	-0.221917	0.205655	-1.07908	0.280554	0.449347
ENSMUSG00000028943	47401.7	-0.00273004	0.185006	-0.0147565	0.988226	0.99304
ENSMUSG00000028950	421.449	0.706798	0.328268	2.15311	0.0313099	0.0867558
ENSMUSG00000028974	730.063	-0.614889	0.288319	-2.13267	0.032952	0.0901844
ENSMUSG00000028977	1019.77	1.39441	0.316491	4.40583	1.05378e-05	9.18378e-05
ENSMUSG00000028978	389.642	-0.293967	0.298637	-0.984365	0.324936	0.497357
ENSMUSG00000029027	137.518	1.46935	0.439369	3.34423	0.000825113	0.00440814
ENSMUSG00000029029	1459.85	-0.479543	0.201137	-2.38416	0.0171183	0.0548348
ENSMUSG00000029049	2184.06	-0.158523	0.193307	-0.820058	0.412183	0.578763
ENSMUSG00000029061	196.996	1.22135	0.391754	3.11763	0.00182311	0.00888766
ENSMUSG00000029095	3438.88	0.544518	0.207546	2.6236	0.00870049	0.0317121
ENSMUSG00000029101	1826.6	-0.291205	0.182833	-1.59274	0.111218	0.22829
ENSMUSG00000029108	1688.76	0.392568	0.183196	2.14288	0.0321225	0.0883794
ENSMUSG00000029121	248.482	0.477432	0.439391	1.08658	0.277224	0.446306
ENSMUSG00000029126	3517.83	-0.024325	0.142614	-0.170565	0.864566	0.917637
ENSMUSG00000029130	482.655	-0.848247	0.319746	-2.65288	0.00798092	0.0296434
ENSMUSG00000029131	6599.17	-0.175975	0.149989	-1.17325	0.240695	0.406808
ENSMUSG00000029182	3568.56	-0.510038	0.181063	-2.81691	0.00484877	0.0203336
ENSMUSG00000029204	81.7112	-8.98586	1.67392	-5.36815	7.95497e-08	1.03415e-06
ENSMUSG00000029205	11604.2	0.447977	0.229139	1.95504	0.0505781	0.127467
ENSMUSG00000029275	9114.14	-0.102206	0.135178	-0.756089	0.449596	0.603875
ENSMUSG00000029304	424557	0.16223	0.169276	0.958378	0.337872	0.510737
ENSMUSG00000029373	4617.92	-7.46909	0.602903	-12.3885	3.01481e-35	4.27555e-33
ENSMUSG00000029413	829.57	0.644634	0.284586	2.26517	0.0235023	0.0697027
ENSMUSG00000029420	804.289	0.113159	0.322749	0.35061	0.725881	0.824145
ENSMUSG00000029433	8164.88	-0.374179	0.132633	-2.82117	0.00478485	0.0201196
ENSMUSG00000029438	1459.21	0.585176	0.265274	2.20593	0.0273889	0.0786647
ENSMUSG00000029442	1243.09	0.25652	0.236611	1.08415	0.2783	0.447122
ENSMUSG00000029463	1380.27	-0.3035	0.174672	-1.73755	0.082291	0.182609
ENSMUSG00000029469	2722.89	0.336788	0.164618	2.04588	0.0407677	0.107428
ENSMUSG00000029524	254.306	-0.345842	0.376183	-0.919344	0.357915	0.531254
ENSMUSG00000029544	564.888	-0.357313	0.274779	-1.30036	0.193477	0.344155
ENSMUSG00000029601	566	-0.0599017	0.318928	-0.187822	0.851016	0.910253
ENSMUSG00000029608	93.6521	0.468686	0.565523	0.828765	0.407237	0.574855
ENSMUSG00000029618	4063.84	-0.56891	0.285606	-1.99194	0.0463779	0.119586
ENSMUSG00000029658	319.399	-0.572434	0.389542	-1.46951	0.141696	0.273233
ENSMUSG00000029660	314.854	0.30572	0.319221	0.957706	0.338211	0.510754
ENSMUSG00000029712	385.151	-0.18397	0.287879	-0.639052	0.522789	0.663589
ENSMUSG00000029714	398.79	1.27205	0.358227	3.55095	0.000383838	0.00230303
ENSMUSG00000029765	6378.14	1.14158	0.210966	5.41119	6.26087e-08	8.34782e-07
ENSMUSG00000029771	480.396	-5.59101	1.70148	-3.28597	0.0010163	0.00530244
ENSMUSG00000029822	2561.73	0.0575636	0.178057	0.323288	0.746477	0.838873
ENSMUSG00000029829	40.8376	0.482652	0.761047	0.634195	0.525953	0.66544
ENSMUSG00000029919	236.3	-5.38328	0.607732	-8.85799	8.14737e-19	5.29579e-17
ENSMUSG00000029925	165.888	-4.169	1.72786	-2.41281	0.0158301	0.0523197
ENSMUSG00000030030	913.975	0.174025	0.203556	0.854926	0.392592	0.562391
ENSMUSG00000030032	1802.95	0.482221	0.171454	2.81254	0.00491523	0.020502
ENSMUSG00000030059	9996.11	-1.03734	0.153924	-6.73931	1.59144e-11	4.06991e-10
ENSMUSG00000030074	1199.22	0.233173	0.250199	0.93195	0.351362	0.52352
ENSMUSG00000030086	5767.49	-0.454944	0.146563	-3.10409	0.00190868	0.00924703
ENSMUSG00000030125	482.169	-0.0741355	0.377263	-0.196509	0.844212	0.907817
ENSMUSG00000030144	369.888	-6.46033	1.29081	-5.00488	5.58958e-07	6.22839e-06
ENSMUSG00000030177	276.773	-0.242025	0.447901	-0.540353	0.588954	0.716667
ENSMUSG00000030207	4520.89	0.484469	0.189636	2.55474	0.0106268	0.0370869
ENSMUSG00000030226	166.715	-0.47592	0.522833	-0.910272	0.362679	0.536793
ENSMUSG00000030246	23670.8	-0.199303	0.170214	-1.1709	0.24164	0.407964
ENSMUSG00000030270	1485.64	-0.135338	0.298078	-0.454036	0.649803	0.766208
ENSMUSG00000030276	1749.95	0.738656	0.221217	3.33905	0.000840647	0.0044758
ENSMUSG00000030302	9173.77	0.491421	0.174982	2.80841	0.00497874	0.0206565
ENSMUSG00000030313	1121.15	0.123166	0.233901	0.526572	0.598491	0.723757
ENSMUSG00000030321	404.005	0.419217	0.271405	1.54462	0.122439	0.246141
ENSMUSG00000030322	644.377	-0.333787	0.273948	-1.21843	0.22306	0.384926
ENSMUSG00000030324	53.1	1.73977	0.80159	2.1704	0.0299767	0.0841074
ENSMUSG00000030327	4056.79	-0.614092	0.220004	-2.79127	0.00525015	0.0214502
ENSMUSG00000030330	11.7572	3.90136	1.46636	2.66058	0.00780072	0.0291127
ENSMUSG00000030376	334.415	1.1655	0.414163	2.81411	0.00489132	0.020457
ENSMUSG00000030401	1853.65	-0.130529	0.23506	-0.555302	0.578688	0.707487
ENSMUSG00000030579	1737.78	-7.10456	1.30492	-5.44444	5.19696e-08	7.04979e-07
ENSMUSG00000030590	359.025	-0.257992	0.317909	-0.811527	0.417063	0.579194
ENSMUSG00000030647	6792.58	-0.617395	0.179176	-3.44575	0.000569482	0.0032423
ENSMUSG00000030669	1247.13	0.870503	0.314992	2.76357	0.00571725	0.0228105
ENSMUSG00000030683	173.84	2.0754	0.449956	4.61246	3.97922e-06	3.71711e-05
ENSMUSG00000030707	494.169	-6.65865	0.558962	-11.9125	1.01828e-32	1.22194e-30
ENSMUSG00000030708	4731.96	-0.136574	0.179587	-0.760485	0.446965	0.603693
ENSMUSG00000030729	11094.5	0.0944162	0.209681	0.450285	0.652505	0.767653
ENSMUSG00000030745	118.533	-9.5212	1.5943	-5.97202	2.3434e-09	4.20195e-08
ENSMUSG00000030757	197.811	-0.0562376	0.521817	-0.107773	0.914176	0.947584
ENSMUSG00000030771	81.9848	-0.442297	0.562025	-0.786969	0.4313	0.59307
ENSMUSG00000030782	1118.75	-0.221873	0.249783	-0.888264	0.374399	0.547387
ENSMUSG00000030786	82.2237	-5.49861	0.957275	-5.74402	9.2453e-09	1.4717e-07
ENSMUSG00000030825	2479.07	0.199935	0.153435	1.30306	0.192554	0.343297
ENSMUSG00000030844	264.433	-4.31511	0.470972	-9.16213	5.08836e-20	3.77993e-18
ENSMUSG00000030850	5545.34	0.283054	0.13089	2.16253	0.0305776	0.0851804
ENSMUSG00000030867	52.8132	0.255681	0.802905	0.318445	0.750148	0.840683
ENSMUSG00000030889	359.939	0.857073	0.394313	2.17358	0.0297364	0.0837342
ENSMUSG00000030905	706.259	-0.140443	0.29428	-0.477242	0.63319	0.752305
ENSMUSG00000030979	969.635	0.0501719	0.219477	0.228598	0.819182	0.891782
ENSMUSG00000030994	941.576	-0.355489	0.220098	-1.61514	0.106281	0.220183
ENSMUSG00000030996	4482.26	0.344483	0.187565	1.83661	0.0662679	0.154989
ENSMUSG00000031007	16543	0.11738	0.155591	0.754412	0.450602	0.6039
ENSMUSG00000031104	317.053	-0.0266963	0.426618	-0.0625765	0.950104	0.970237
ENSMUSG00000031105	2200.39	-0.195649	0.186809	-1.04732	0.294951	0.46564
ENSMUSG00000031109	572.672	-0.785589	0.363663	-2.16021	0.0307564	0.0855257
ENSMUSG00000031144	3029.55	0.352103	0.188557	1.86736	0.0618517	0.146863
ENSMUSG00000031153	1958.53	0.122958	0.219843	0.5593	0.575957	0.706362
ENSMUSG00000031155	1299.73	0.2019	0.317441	0.636024	0.524761	0.665071
ENSMUSG00000031174	1425.65	-0.148473	0.316896	-0.468523	0.639411	0.758206
ENSMUSG00000031229	2658.4	0.99331	0.189319	5.24674	1.54811e-07	1.85773e-06
ENSMUSG00000031264	62.5516	-8.60297	1.62387	-5.29781	1.17198e-07	1.45102e-06
ENSMUSG00000031284	13036.9	0.0298883	0.152883	0.195498	0.845003	0.907817
ENSMUSG00000031347	12579.6	-0.438697	0.143164	-3.0643	0.00218179	0.0103452
ENSMUSG00000031428	5427.24	0.398968	0.210434	1.89593	0.0579693	0.140492
ENSMUSG00000031438	7895.66	0.382065	0.183428	2.08291	0.037259	0.100041
ENSMUSG00000031448	237.788	-0.947367	0.554424	-1.70874	0.0874992	0.192795
ENSMUSG00000031458	2825.7	-0.588668	0.156694	-3.7568	0.000172101	0.00112333
ENSMUSG00000031461	26.2159	1.59502	1.50754	1.05803	0.290041	0.461228
ENSMUSG00000031539	5114.87	-0.206608	0.173237	-1.19263	0.233014	0.397279
ENSMUSG00000031543	658.036	0.899854	0.347884	2.58665	0.00969148	0.0345966
ENSMUSG00000031654	274.749	0.447586	0.343353	1.30358	0.192378	0.343297
ENSMUSG00000031662	152.18	-1.55277	0.531465	-2.92169	0.00348141	0.0153853
ENSMUSG00000031688	600.208	0.541988	0.280614	1.93143	0.0534295	0.131883
ENSMUSG00000031755	1097.56	0.563039	0.204827	2.74885	0.0059805	0.0235002
ENSMUSG00000031781	8452.33	-0.0128602	0.136388	-0.0942911	0.924878	0.954239
ENSMUSG00000031782	3373.34	-0.659945	0.192845	-3.42215	0.000621277	0.0034863
ENSMUSG00000031786	881.358	0.218833	0.225914	0.968657	0.332716	0.505392
ENSMUSG00000031831	454.158	-0.20199	0.376314	-0.536759	0.591434	0.718006
ENSMUSG00000031840	4497.98	-0.133972	0.162081	-0.826573	0.408479	0.574855
ENSMUSG00000031883	2014.98	-0.191069	0.328833	-0.581051	0.561206	0.695379
ENSMUSG00000031893	231.668	0.960108	0.48458	1.98132	0.0475554	0.121617
ENSMUSG00000031934	3308.41	0.163465	0.19029	0.859034	0.390322	0.559653
ENSMUSG00000031957	10.1087	2.50749	2.45544	1.0212	0.30716	0.478692
ENSMUSG00000031970	335.074	-0.35552	0.294244	-1.20825	0.226951	0.389487
ENSMUSG00000032020	6645.11	0.0221843	0.148079	0.149814	0.880911	0.925402
ENSMUSG00000032101	556.307	0.0898574	0.250656	0.358489	0.719978	0.821628
ENSMUSG00000032181	3592	0.800745	0.154817	5.17219	2.31363e-07	2.71373e-06
ENSMUSG00000032184	2641.5	-0.467792	0.192916	-2.42485	0.0153148	0.0508321
ENSMUSG00000032221	1772.22	0.212894	0.251093	0.847868	0.396511	0.566964
ENSMUSG00000032245	2312.55	0.118702	0.222414	0.533699	0.59355	0.719454
ENSMUSG00000032246	24871.4	-0.424224	0.178629	-2.37489	0.0175542	0.0560012
ENSMUSG00000032251	1352.22	-0.299619	0.22149	-1.35274	0.176138	0.321284
ENSMUSG00000032262	4299	0.382324	0.175656	2.17655	0.0295139	0.083258
ENSMUSG00000032285	6290.37	-0.524553	0.185308	-2.83072	0.0046444	0.0196882
ENSMUSG00000032308	1048.03	-0.181729	0.210044	-0.865195	0.386932	0.556839
ENSMUSG00000032336	12810.5	0.161998	0.213205	0.759826	0.447359	0.603702
ENSMUSG00000032373	13232.7	0.469127	0.223387	2.10007	0.0357229	0.0967496
ENSMUSG00000032415	278.81	-0.404447	0.35381	-1.14312	0.252989	0.419855
ENSMUSG00000032417	350.704	-0.286806	0.277111	-1.03499	0.300674	0.471883
ENSMUSG00000032435	5802.03	-0.0403141	0.19878	-0.202808	0.839285	0.904827
ENSMUSG00000032489	1225.3	0.302144	0.291036	1.03817	0.299193	0.470031
ENSMUSG00000032492	1026.71	-0.25096	0.218146	-1.15042	0.249969	0.416889
ENSMUSG00000032495	425.773	-0.0022978	0.360888	-0.00636706	0.99492	0.996197
ENSMUSG00000032514	817.742	-0.142257	0.247927	-0.573786	0.566113	0.698912
ENSMUSG00000032589	178.897	1.36879	0.78012	1.75459	0.0793297	0.177557
ENSMUSG00000032656	906.174	0.0675066	0.246254	0.274134	0.783982	0.865163
ENSMUSG00000032680	318.976	0.0117652	0.338754	0.0347309	0.972294	0.982172
ENSMUSG00000032725	41.976	-8.02596	1.63389	-4.91218	9.00682e-07	9.49367e-06
ENSMUSG00000032796	96.3629	2.0174	0.552315	3.65262	0.000259579	0.00163283
ENSMUSG00000032815	665.125	0.24439	0.314789	0.776363	0.437535	0.596132
ENSMUSG00000032818	4357.18	0.686605	0.163905	4.18906	2.80118e-05	0.000218492
ENSMUSG00000032870	3352.44	-0.474145	0.183508	-2.58379	0.00977224	0.0348052
ENSMUSG00000032908	330.264	1.59797	0.532808	2.99915	0.00270736	0.012422
ENSMUSG00000032968	260.831	1.19881	0.370373	3.23677	0.00120889	0.0061551
ENSMUSG00000033004	1704.38	0.954252	0.266505	3.58061	0.000342795	0.00208078
ENSMUSG00000033053	1318.38	-0.518946	0.264227	-1.96401	0.0495284	0.125321
ENSMUSG00000033060	7448.56	0.194296	0.149992	1.29537	0.195193	0.346023
ENSMUSG00000033088	9210.85	0.0248319	0.153498	0.161773	0.871485	0.920028
ENSMUSG00000033177	414.915	1.26021	0.355238	3.54749	0.000388915	0.00232455
ENSMUSG00000033220	412.193	-9.87834	1.4493	-6.81593	9.36582e-12	2.51908e-10
ENSMUSG00000033276	563.972	1.26428	0.300844	4.20245	2.6404e-05	0.000206986
ENSMUSG00000033282	762.814	0.129519	0.300155	0.431508	0.666099	0.777199
ENSMUSG00000033342	3815.99	0.561643	0.226717	2.47728	0.0132387	0.0447023
ENSMUSG00000033383	612.984	-1.08805	0.542087	-2.00715	0.0447339	0.116114
ENSMUSG00000033419	3458.87	0.206097	0.165522	1.24513	0.213084	0.371409
ENSMUSG00000033486	352.784	-0.204053	0.358045	-0.56991	0.568739	0.700015
ENSMUSG00000033498	2064.14	1.00719	0.196069	5.1369	2.79301e-07	3.25157e-06
ENSMUSG00000033577	14859.6	0.129923	0.12682	1.02447	0.305612	0.477232
ENSMUSG00000033777	228.737	-9.02675	1.48353	-6.08464	1.16756e-09	2.19444e-08
ENSMUSG00000033825	222.071	-10.429	1.52281	-6.84851	7.46236e-12	2.12627e-10
ENSMUSG00000033900	4938	0.190335	0.216307	0.87993	0.378897	0.550341
ENSMUSG00000033943	1488.16	0.915916	0.310536	2.94947	0.00318319	0.014352
ENSMUSG00000033949	4132.76	0.527255	0.141432	3.72798	0.000193018	0.00124941
ENSMUSG00000033966	4785.15	-0.52403	0.241237	-2.17226	0.0298358	0.0838628
ENSMUSG00000033981	72.8664	0.128486	0.685498	0.187434	0.85132	0.910253
ENSMUSG00000034105	1054.44	-0.498875	0.252877	-1.97279	0.048519	0.123676
ENSMUSG00000034116	218.191	-10.4048	1.52624	-6.81723	9.2815e-12	2.51908e-10
ENSMUSG00000034160	2670.8	0.937409	0.222199	4.21879	2.45617e-05	0.000196494
ENSMUSG00000034205	15.5595	1.05037	1.5897	0.660733	0.508783	0.652716
ENSMUSG00000034227	2284.61	-0.0587919	0.178294	-0.329747	0.741591	0.835898
ENSMUSG00000034285	1307.22	-0.618329	0.188303	-3.28368	0.00102459	0.00532492
ENSMUSG00000034295	204.294	0.12167	0.430244	0.282794	0.777335	0.86064
ENSMUSG00000034329	4858.46	0.272637	0.159421	1.71017	0.0872339	0.192482
ENSMUSG00000034334	1075.1	-0.0575002	0.223359	-0.257433	0.796844	0.87479
ENSMUSG00000034336	352.975	-0.247108	0.295062	-0.837479	0.402323	0.572128
ENSMUSG00000034349	670.867	0.0342985	0.240067	0.142871	0.886392	0.929907
ENSMUSG00000034391	96.5412	1.42586	0.618703	2.30459	0.0211896	0.0644362
ENSMUSG00000034416	21.2707	0.863671	1.11496	0.774618	0.438566	0.596132
ENSMUSG00000034427	3240.69	1.68429	0.159396	10.5667	4.2503e-26	3.90027e-24
ENSMUSG00000034467	8468.26	-0.361078	0.17884	-2.019	0.0434876	0.113446
ENSMUSG00000034485	6917.13	-0.859355	0.135066	-6.3625	1.98494e-10	4.12868e-09
ENSMUSG00000034486	437.788	0.377719	0.334893	1.12788	0.259371	0.427715
ENSMUSG00000034532	770.161	-0.323913	0.233303	-1.38838	0.165021	0.303219
ENSMUSG00000034579	527.604	0.857996	0.335827	2.55488	0.0106225	0.0370869
ENSMUSG00000034613	1537.62	0.11864	0.186556	0.63595	0.524809	0.665071
ENSMUSG00000034648	2923.91	0.480798	0.18789	2.55893	0.0104994	0.0368898
ENSMUSG00000034652	256.714	-3.51757	0.775982	-4.53306	5.81355e-06	5.27275e-05
ENSMUSG00000034706	1771.09	-0.122387	0.238519	-0.513111	0.607874	0.7317
ENSMUSG00000034773	498.139	-0.395391	0.355452	-1.11236	0.265983	0.434486
ENSMUSG00000034799	204.626	1.49048	0.549711	2.71139	0.0067001	0.025618
ENSMUSG00000034839	530.376	0.0676147	0.312745	0.216198	0.828834	0.897903
ENSMUSG00000034842	1869.52	-0.0595395	0.158444	-0.375777	0.707082	0.812858
ENSMUSG00000034863	390.319	0.483202	0.321792	1.5016	0.133201	0.261704
ENSMUSG00000034872	384.107	-0.124841	0.447707	-0.278845	0.780364	0.86277
ENSMUSG00000034891	94.5878	0.199878	0.607913	0.328794	0.742312	0.836106
ENSMUSG00000035032	785.229	-0.157844	0.245844	-0.64205	0.520841	0.662194
ENSMUSG00000035049	1211.12	-0.25859	0.208226	-1.24187	0.214285	0.37267
ENSMUSG00000035067	320.323	0.249341	0.307061	0.812024	0.416778	0.579194
ENSMUSG00000035126	1128.54	0.259638	0.222896	1.16484	0.244085	0.409984
ENSMUSG00000035179	7234.38	-0.0214833	0.18975	-0.113219	0.909857	0.945675
ENSMUSG00000035189	2623.15	0.54206	0.213504	2.53888	0.011121	0.0385526
ENSMUSG00000035211	105.115	0.35091	0.616124	0.569545	0.568986	0.700015
ENSMUSG00000035266	472.219	0.490395	0.325969	1.50442	0.132472	0.261474
ENSMUSG00000035284	309.177	-0.0888445	0.402357	-0.22081	0.82524	0.897125
ENSMUSG00000035285	1801.34	-0.346228	0.162046	-2.13661	0.03263	0.0896176
ENSMUSG00000035352	1434.41	-5.59984	0.308308	-18.1631	1.01093e-73	5.25684e-71
ENSMUSG00000035394	381.471	0.847253	0.412538	2.05376	0.0399993	0.10594
ENSMUSG00000035458	55.4952	2.27691	0.821094	2.77302	0.00555381	0.0222723
ENSMUSG00000035578	3515.23	-0.457862	0.138026	-3.31721	0.000909214	0.0047918
ENSMUSG00000035580	480.769	-0.101559	0.353513	-0.287284	0.773895	0.859253
ENSMUSG00000035711	79.2474	0.0444348	0.634657	0.0700139	0.944183	0.967547
ENSMUSG00000035775	384.476	0.816129	0.334578	2.43928	0.0147166	0.0489507
ENSMUSG00000035790	3119.34	0.0911736	0.195	0.467558	0.640101	0.758206
ENSMUSG00000035849	1449.55	-0.282349	0.296538	-0.952153	0.341019	0.514
ENSMUSG00000035864	563.924	0.497583	0.284468	1.74917	0.0802618	0.179071
ENSMUSG00000035873	4284.15	-0.309648	0.209452	-1.47837	0.139307	0.269962
ENSMUSG00000035930	821.894	0.544628	0.293331	1.8567	0.0633532	0.149744
ENSMUSG00000035963	41.0375	0.657912	0.906734	0.725584	0.468094	0.617267
ENSMUSG00000035964	8976.41	0.538903	0.137456	3.92055	8.83478e-05	0.000615279
ENSMUSG00000035984	3434.37	-0.0489392	0.147361	-0.332104	0.739811	0.834493
ENSMUSG00000036022	1126.72	-0.246996	0.215036	-1.14863	0.25071	0.416889
ENSMUSG00000036110	135.365	0.986157	0.420801	2.34352	0.0191026	0.0591271
ENSMUSG00000036111	2820.43	-0.466717	0.164042	-2.84511	0.00443962	0.018923
ENSMUSG00000036192	336.456	-3.11053	0.547092	-5.68556	1.30386e-08	1.91889e-07
ENSMUSG00000036278	1900.96	0.0487029	0.192098	0.253531	0.799858	0.877481
ENSMUSG00000036309	140610	-0.552119	0.188235	-2.93314	0.00335553	0.0148711
ENSMUSG00000036377	585.168	0.743617	0.253454	2.93393	0.00334701	0.0148711
ENSMUSG00000036422	124.911	-0.495942	0.655204	-0.756929	0.449093	0.603875
ENSMUSG00000036430	6454.74	-0.484324	0.180711	-2.68011	0.00735984	0.0277327
ENSMUSG00000036438	155846	-0.322355	0.118554	-2.71906	0.00654677	0.0252796
ENSMUSG00000036537	322.287	-0.638889	0.337018	-1.89571	0.057998	0.140492
ENSMUSG00000036551	504.268	1.57267	0.303297	5.18527	2.15708e-07	2.54927e-06
ENSMUSG00000036564	748.456	-0.892105	0.365574	-2.44028	0.0146758	0.0489193
ENSMUSG00000036572	1391.28	0.292301	0.273629	1.06824	0.285413	0.456193
ENSMUSG00000036594	1353.78	-6.92502	1.09632	-6.3166	2.67373e-10	5.48818e-09
ENSMUSG00000036598	394.312	0.143671	0.312884	0.459182	0.646103	0.764155
ENSMUSG00000036639	637.299	-0.646088	0.286669	-2.25378	0.0242099	0.0713813
ENSMUSG00000036699	5716.89	0.513777	0.242469	2.11894	0.0340952	0.0929869
ENSMUSG00000036712	5698.31	-0.309524	0.142003	-2.17971	0.0292791	0.0827452
ENSMUSG00000036745	2213.86	0.0466255	0.202383	0.230382	0.817795	0.890894
ENSMUSG00000036764	1686.36	-0.213621	0.184657	-1.15685	0.247333	0.413547
ENSMUSG00000036766	5844.42	1.30294	0.201302	6.47252	9.63796e-11	2.21106e-09
ENSMUSG00000036815	273.963	0.47333	0.607634	0.778973	0.435996	0.596132
ENSMUSG00000036887	3385.91	-6.8775	2.03264	-3.38354	0.000715586	0.00394457
ENSMUSG00000036896	3765.7	-8.0297	1.1666	-6.88296	5.862e-12	1.7586e-10
ENSMUSG00000036905	5802.42	-4.22281	0.25308	-16.6857	1.66631e-62	6.4986e-60
ENSMUSG00000036908	792.285	-3.10905	0.284879	-10.9136	9.92421e-28	9.67611e-26
ENSMUSG00000036918	7310.64	0.269116	0.137903	1.95149	0.0509987	0.128067
ENSMUSG00000037101	3550.55	-0.0283705	0.253866	-0.111754	0.911018	0.946198
ENSMUSG00000037151	574.201	-0.173366	0.285535	-0.607161	0.543744	0.680771
ENSMUSG00000037159	772.157	0.48332	0.289524	1.66936	0.0950459	0.204377
ENSMUSG00000037161	837.836	0.50332	0.42203	1.19262	0.23302	0.397279
ENSMUSG00000037166	253.853	-0.407038	0.437456	-0.930466	0.35213	0.523821
ENSMUSG00000037190	7915.06	0.788536	0.166798	4.72749	2.27314e-06	2.18895e-05
ENSMUSG00000037196	2762.13	0.058584	0.165085	0.354872	0.722685	0.821776
ENSMUSG00000037204	2332.65	-0.488972	0.307663	-1.58931	0.11199	0.229572
ENSMUSG00000037217	444.616	0.0253267	0.301896	0.0838924	0.933142	0.959592
ENSMUSG00000037259	2461.86	-0.048971	0.269282	-0.181858	0.855695	0.914304
ENSMUSG00000037266	6159.12	0.570201	0.131717	4.32898	1.49798e-05	0.000127003
ENSMUSG00000037418	695.325	0.731695	0.269703	2.71296	0.00666845	0.025618
ENSMUSG00000037428	688.923	1.13058	0.333201	3.39309	0.000691083	0.00383662
ENSMUSG00000037525	634.186	-0.357276	0.239352	-1.49268	0.13552	0.263935
ENSMUSG00000037541	2014.63	0.745444	0.257297	2.89721	0.00376497	0.0163603
ENSMUSG00000037646	544.348	1.41944	0.444487	3.19344	0.00140589	0.00706379
ENSMUSG00000037683	995.419	0.685007	0.257682	2.65834	0.00785261	0.0292365
ENSMUSG00000037716	2349.39	-0.00772111	0.315297	-0.0244883	0.980463	0.986789
ENSMUSG00000037738	442.439	0.229181	0.330521	0.693393	0.488063	0.635541
ENSMUSG00000037747	357.065	-0.0311017	0.363096	-0.0856569	0.931739	0.958782
ENSMUSG00000037852	65232.7	0.590758	0.128356	4.60249	4.17468e-06	3.87649e-05
ENSMUSG00000037887	1292.65	-0.146861	0.218335	-0.672638	0.501177	0.647216
ENSMUSG00000037894	7705.21	-0.450651	0.164608	-2.73772	0.00618662	0.0241746
ENSMUSG00000037971	3093.88	-0.661639	0.159022	-4.16067	3.17319e-05	0.000245059
ENSMUSG00000038011	114.723	2.57274	0.847745	3.03481	0.0024069	0.011235
ENSMUSG00000038020	729.339	0.939255	0.227922	4.12095	3.77318e-05	0.000284355
ENSMUSG00000038060	59.427	0.960893	0.812581	1.18252	0.237	0.402306
ENSMUSG00000038132	6519.2	0.304996	0.16588	1.83866	0.0659658	0.154514
ENSMUSG00000038147	439.068	-11.4129	1.52548	-7.4815	7.34801e-14	3.18414e-12
ENSMUSG00000038150	30653.4	0.140134	0.1379	1.0162	0.309532	0.481907
ENSMUSG00000038152	586.754	-0.00937088	0.274105	-0.0341871	0.972728	0.982172
ENSMUSG00000038179	266.505	-10.692	1.4946	-7.15377	8.44267e-13	2.99331e-11
ENSMUSG00000038201	159.727	-0.456361	0.638485	-0.714755	0.47476	0.624474
ENSMUSG00000038215	495.011	0.164357	0.40307	0.407763	0.683448	0.792416
ENSMUSG00000038271	424.311	1.03983	0.270559	3.84325	0.000121413	0.000827094
ENSMUSG00000038286	2032.94	-0.447141	0.174424	-2.56352	0.0103615	0.0365701
ENSMUSG00000038295	449.471	-0.28242	0.27361	-1.0322	0.30198	0.47298
ENSMUSG00000038453	740.723	1.19565	0.375106	3.18751	0.00143504	0.00717519
ENSMUSG00000038457	10431.4	0.474219	0.206075	2.3012	0.0213804	0.06489
ENSMUSG00000038486	1551.92	1.11247	0.209454	5.31127	1.08866e-07	1.36961e-06
ENSMUSG00000038570	741.299	-0.593178	0.298607	-1.98648	0.0469798	0.120938
ENSMUSG00000038594	1423.25	-1.32598	0.321651	-4.12241	3.74924e-05	0.000283923
ENSMUSG00000038608	1522.28	0.472776	0.197168	2.39783	0.0164924	0.0532866
ENSMUSG00000038630	215.879	-0.740589	0.39225	-1.88805	0.0590189	0.141864
ENSMUSG00000038637	537.293	0.534528	0.240962	2.21831	0.0265337	0.0767952
ENSMUSG00000038642	4115.31	-7.29011	0.352523	-20.6798	5.26469e-95	8.21291e-92
ENSMUSG00000038646	2632.87	-0.543658	0.176178	-3.08585	0.00202973	0.00965361
ENSMUSG00000038664	892.135	1.08509	0.329777	3.29039	0.00100049	0.00525512
ENSMUSG00000038738	275.885	1.56944	0.404777	3.8773	0.000105623	0.000725868
ENSMUSG00000038764	3346.53	0.203075	0.173602	1.16977	0.242093	0.408286
ENSMUSG00000038765	121.09	0.618066	0.552498	1.11868	0.263278	0.432429
ENSMUSG00000038903	4848.47	-0.0923255	0.159673	-0.578215	0.563119	0.69609
ENSMUSG00000038916	318.101	0.189007	0.460585	0.410364	0.681539	0.791661
ENSMUSG00000038984	495.744	-0.247758	0.304647	-0.813263	0.416067	0.579194
ENSMUSG00000039018	1047.34	-0.290404	0.262921	-1.10453	0.269364	0.437109
ENSMUSG00000039033	1698.44	-0.527129	0.235825	-2.23525	0.0254009	0.0740661
ENSMUSG00000039105	18297.6	-0.650934	0.150676	-4.32008	1.55975e-05	0.000130817
ENSMUSG00000039110	3113.77	0.372012	0.218368	1.7036	0.0884551	0.194352
ENSMUSG00000039257	128.192	-0.704474	0.643324	-1.09505	0.273493	0.441494
ENSMUSG00000039278	298.05	0.183676	0.514719	0.356848	0.721206	0.821776
ENSMUSG00000039298	6180.61	-0.172513	0.193279	-0.892559	0.372093	0.546064
ENSMUSG00000039307	332.943	1.22694	0.41636	2.94684	0.00321044	0.0144319
ENSMUSG00000039391	3123.21	0.0908263	0.209525	0.433486	0.664662	0.776683
ENSMUSG00000039478	1319.65	-0.316427	0.192497	-1.6438	0.100217	0.210132
ENSMUSG00000039485	2138.03	0.219505	0.199646	1.09947	0.271565	0.439462
ENSMUSG00000039530	6933.98	0.408029	0.166623	2.44881	0.0143328	0.0478782
ENSMUSG00000039542	1164.21	1.16599	0.21195	5.50128	3.77054e-08	5.34731e-07
ENSMUSG00000039552	1014.99	-0.885069	0.209884	-4.21694	2.47643e-05	0.000197104
ENSMUSG00000039556	90.2318	0.030849	0.51441	0.0599697	0.95218	0.970237
ENSMUSG00000039628	3072.74	0.0329082	0.201171	0.163583	0.870059	0.920028
ENSMUSG00000039652	1072.07	-0.406736	0.281034	-1.44729	0.147817	0.281085
ENSMUSG00000039670	333.275	-0.577731	0.341744	-1.69054	0.0909248	0.198659
ENSMUSG00000039676	2119.72	-0.153464	0.249021	-0.616268	0.537718	0.675792
ENSMUSG00000039680	22524.4	-0.477862	0.142687	-3.34901	0.000811004	0.00436264
ENSMUSG00000039683	824.063	1.0751	0.229559	4.68332	2.82261e-06	2.65257e-05
ENSMUSG00000039715	3406.11	-0.158811	0.212397	-0.747711	0.454635	0.60618
ENSMUSG00000039717	669.22	-0.616114	0.323195	-1.90633	0.0566078	0.138849
ENSMUSG00000039745	978.168	-0.517281	0.219225	-2.35959	0.0182951	0.0576572
ENSMUSG00000039759	1007.86	0.0551045	0.220343	0.250085	0.802522	0.879093
ENSMUSG00000039795	811.55	-0.0366653	0.210219	-0.174415	0.861539	0.916156
ENSMUSG00000039801	854.259	1.03603	0.306031	3.38537	0.000710813	0.00393216
ENSMUSG00000039860	726.625	0.440798	0.362626	1.21557	0.224148	0.385525
ENSMUSG00000039958	1020.95	0.0434754	0.248374	0.17504	0.861048	0.916156
ENSMUSG00000040037	1123.2	0.202885	0.289195	0.70155	0.48296	0.631003
ENSMUSG00000040040	749.278	-0.290454	0.231289	-1.25581	0.209186	0.365841
ENSMUSG00000040136	228.169	0.682762	0.489113	1.39592	0.162739	0.300407
ENSMUSG00000040189	1506.11	0.896479	0.237746	3.77074	0.000162767	0.0010677
ENSMUSG00000040265	106.471	-1.32041	0.568	-2.32466	0.02009	0.0615726
ENSMUSG00000040276	1838.05	0.0303926	0.195907	0.155138	0.876713	0.922204
ENSMUSG00000040345	87.9128	-7.64862	1.52902	-5.00229	5.66539e-07	6.26809e-06
ENSMUSG00000040407	7244.19	1.72091	0.207872	8.27871	1.24522e-16	6.6984e-15
ENSMUSG00000040473	4028.97	-0.039438	0.162886	-0.242121	0.808686	0.884058
ENSMUSG00000040648	1355.87	-0.0876274	0.199399	-0.439457	0.66033	0.77336
ENSMUSG00000040658	1343.86	-1.13226	0.259532	-4.36268	1.28479e-05	0.000110125
ENSMUSG00000040729	812.876	-0.18973	0.289545	-0.65527	0.512294	0.653992
ENSMUSG00000040747	1328.27	-5.69324	2.0071	-2.83655	0.00456044	0.019385
ENSMUSG00000040770	261.397	-0.0202047	0.457215	-0.0441907	0.964752	0.975382
ENSMUSG00000040867	101.096	-0.46398	0.471507	-0.984037	0.325098	0.497357
ENSMUSG00000040972	3212.74	0.277363	0.20913	1.32627	0.184751	0.333193
ENSMUSG00000041020	608.383	0.410104	0.283052	1.44886	0.147376	0.280754
ENSMUSG00000041035	4093.72	-0.565714	0.154367	-3.66473	0.000247598	0.00157013
ENSMUSG00000041062	1626.39	0.345323	0.218619	1.57957	0.114206	0.232891
ENSMUSG00000041132	348.703	0.057197	0.316425	0.18076	0.856556	0.914452
ENSMUSG00000041147	185.849	1.03341	0.415359	2.488	0.0128462	0.0437557
ENSMUSG00000041161	2678.02	-0.360732	0.171738	-2.10047	0.0356871	0.0967496
ENSMUSG00000041261	582.772	-0.722172	0.39968	-1.80687	0.0707819	0.163102
ENSMUSG00000041268	1128.35	1.23293	0.302821	4.07147	4.67168e-05	0.000342151
ENSMUSG00000041346	718.749	-0.394373	0.255542	-1.54328	0.122763	0.246473
ENSMUSG00000041476	28465.8	-0.401311	0.15146	-2.64963	0.0080581	0.029859
ENSMUSG00000041515	623.493	-3.68079	0.442125	-8.32523	8.41662e-17	4.68926e-15
ENSMUSG00000041556	104302	-0.582641	0.133971	-4.349	1.36757e-05	0.000116579
ENSMUSG00000041594	3579.9	-0.188768	0.177248	-1.06499	0.286879	0.457131
ENSMUSG00000041653	273.482	0.707048	0.372774	1.89672	0.0578646	0.140492
ENSMUSG00000041695	680.169	0.0723885	0.252589	0.286586	0.774429	0.859253
ENSMUSG00000041762	4856.54	1.06415	0.149181	7.13331	9.79847e-13	3.32296e-11
ENSMUSG00000041777	1309.36	0.110525	0.302891	0.364899	0.715187	0.818871
ENSMUSG00000041798	375.396	0.437538	0.343702	1.27302	0.203013	0.358145
ENSMUSG00000041809	828.301	-0.102962	0.225082	-0.45744	0.647355	0.764476
ENSMUSG00000041930	349.222	0.265278	0.317361	0.835887	0.403219	0.572879
ENSMUSG00000041975	698.897	-1.7201	0.42598	-4.03799	5.39109e-05	0.000392995
ENSMUSG00000041986	20970.2	0.346347	0.15781	2.19472	0.028184	0.0799519
ENSMUSG00000042050	1827.99	0.917461	0.209261	4.3843	1.1636e-05	0.000100845
ENSMUSG00000042064	2538.55	0.327264	0.163429	2.00248	0.0452327	0.117214
ENSMUSG00000042078	369.931	-0.0578649	0.411841	-0.140503	0.888262	0.930618
ENSMUSG00000042215	5116.55	-0.183575	0.238427	-0.769944	0.441333	0.597972
ENSMUSG00000042286	243.576	-6.55179	0.737861	-8.87944	6.7198e-19	4.55778e-17
ENSMUSG00000042359	3600.39	-0.326252	0.146874	-2.2213	0.0263307	0.0764914
ENSMUSG00000042389	1424.52	-0.248877	0.196763	-1.26486	0.205923	0.360943
ENSMUSG00000042417	321.938	-0.26865	0.309376	-0.86836	0.385197	0.555368
ENSMUSG00000042433	124.737	-0.30023	0.648925	-0.462657	0.64361	0.761784
ENSMUSG00000042500	605.122	-0.194954	0.296974	-0.65647	0.511522	0.653541
ENSMUSG00000042523	1023	-0.0273251	0.198563	-0.137614	0.890545	0.931758
ENSMUSG00000042564	94.3157	-0.146137	0.667505	-0.21893	0.826704	0.897903
ENSMUSG00000042581	1009.41	1.50287	0.205216	7.32335	2.41854e-13	9.67418e-12
ENSMUSG00000042616	3297.66	0.285523	0.177932	1.60467	0.108566	0.224203
ENSMUSG00000042647	184.577	1.19501	0.41085	2.90863	0.00363012	0.0158969
ENSMUSG00000042675	9608.63	-0.400854	0.153453	-2.61223	0.00899543	0.0325589
ENSMUSG00000042678	2758.57	1.12842	0.229462	4.9177	8.75684e-07	9.29297e-06
ENSMUSG00000042694	3504.46	0.01231	0.200439	0.0614151	0.951029	0.970237
ENSMUSG00000042707	329.886	0.688172	0.352737	1.95095	0.0510627	0.128067
ENSMUSG00000042708	393.103	0.768388	0.320469	2.3977	0.0164983	0.0532866
ENSMUSG00000042750	7827.9	-0.276817	0.166493	-1.66264	0.0963847	0.205973
ENSMUSG00000042751	490.698	0.209968	0.331985	0.632462	0.527085	0.666331
ENSMUSG00000042763	1358.66	0.240696	0.290651	0.828125	0.4076	0.574855
ENSMUSG00000042766	328.14	0.0648016	0.330296	0.196192	0.84446	0.907817
ENSMUSG00000042834	2474.59	-1.24818	0.359626	-3.47076	0.000518985	0.00300973
ENSMUSG00000042851	625.774	0.323166	0.281185	1.1493	0.250433	0.416889
ENSMUSG00000042861	29196.5	0.147727	0.16193	0.912287	0.361618	0.53573
ENSMUSG00000042992	1438.18	-0.649414	0.270572	-2.40015	0.0163884	0.0532625
ENSMUSG00000043020	1759.36	1.20142	0.18631	6.44852	1.1295e-10	2.55365e-09
ENSMUSG00000043165	164.86	-0.93588	0.417189	-2.2433	0.0248776	0.0729492
ENSMUSG00000043168	65.8517	0.390441	0.585071	0.66734	0.504555	0.649964
ENSMUSG00000043388	2420.76	0.97365	0.226269	4.30307	1.68448e-05	0.000140524
ENSMUSG00000043419	1159.74	-0.211983	0.237046	-0.894272	0.371177	0.545231
ENSMUSG00000043498	117.145	0.183264	0.50991	0.359404	0.719293	0.821447
ENSMUSG00000043541	634.305	0.52767	0.271049	1.94677	0.0515629	0.128907
ENSMUSG00000043833	27.231	1.10974	1.25377	0.885121	0.376091	0.54832
ENSMUSG00000043843	181.037	1.58045	0.442272	3.57349	0.000352254	0.00212991
ENSMUSG00000043850	6383.55	0.0697349	0.178532	0.390602	0.696092	0.802589
ENSMUSG00000043913	432.836	-0.0866008	0.317736	-0.272555	0.785195	0.865657
ENSMUSG00000044017	4337.03	0.00104567	0.226765	0.00461126	0.996321	0.99696
ENSMUSG00000044080	125182	-0.504176	0.140056	-3.59981	0.000318445	0.00194814
ENSMUSG00000044092	197.261	-0.0790572	0.463952	-0.170399	0.864696	0.917637
ENSMUSG00000044164	496.216	-0.00854829	0.268968	-0.0317817	0.974646	0.983472
ENSMUSG00000044252	5076.69	-0.388344	0.179189	-2.16723	0.0302171	0.0844779
ENSMUSG00000044254	870.728	1.46244	0.219307	6.66844	2.58531e-11	6.40171e-10
ENSMUSG00000044364	689.053	0.0455949	0.262755	0.173527	0.862237	0.916274
ENSMUSG00000044365	1088.08	-0.100801	0.201287	-0.500784	0.616523	0.738691
ENSMUSG00000044377	197.683	-0.830122	0.350194	-2.37046	0.0177659	0.0563309
ENSMUSG00000044378	200.997	0.633455	0.376129	1.68414	0.0921541	0.201063
ENSMUSG00000044429	41.005	0.248069	0.730454	0.33961	0.734151	0.831114
ENSMUSG00000044469	609.712	-0.356853	0.25337	-1.40842	0.159006	0.294945
ENSMUSG00000044626	3806.8	-0.242868	0.245343	-0.989914	0.322216	0.495717
ENSMUSG00000044667	1896.63	0.381905	0.182045	2.09786	0.0359172	0.0971073
ENSMUSG00000044694	644.528	0.770589	0.322562	2.38896	0.016896	0.0544091
ENSMUSG00000044719	4792.35	-0.216276	0.170573	-1.26794	0.204821	0.35982
ENSMUSG00000044811	442.173	-11.423	1.50267	-7.60177	2.92118e-14	1.38092e-12
ENSMUSG00000044816	2841.98	-0.242067	0.205572	-1.17753	0.238985	0.405236
ENSMUSG00000044835	399.866	-0.372256	0.51002	-0.729886	0.46546	0.614869
ENSMUSG00000044912	301.66	0.150743	0.29426	0.512278	0.608456	0.731836
ENSMUSG00000044927	140.357	0.0458238	0.416545	0.110009	0.912402	0.947004
ENSMUSG00000044951	140.952	-0.438665	0.601041	-0.729841	0.465487	0.614869
ENSMUSG00000045031	1009.27	-0.700336	0.221962	-3.1552	0.00160386	0.00791781
ENSMUSG00000045039	2638.7	1.39786	0.231668	6.03389	1.60062e-09	2.93761e-08
ENSMUSG00000045104	1018.5	-0.838644	0.271344	-3.09071	0.00199679	0.00952597
ENSMUSG00000045174	348.078	0.92585	0.310024	2.98638	0.00282305	0.0129148
ENSMUSG00000045193	12628.7	-0.0905983	0.153524	-0.590125	0.555107	0.690564
ENSMUSG00000045259	266.035	0.0272472	0.3525	0.0772969	0.938387	0.964351
ENSMUSG00000045284	589.981	0.438546	0.310007	1.41463	0.157177	0.292597
ENSMUSG00000045316	1081.53	-0.682946	0.232524	-2.93709	0.00331304	0.014809
ENSMUSG00000045482	1047.44	1.18391	0.275359	4.2995	1.71181e-05	0.000142044
ENSMUSG00000045589	664.078	-0.519103	0.382249	-1.35802	0.174457	0.319054
ENSMUSG00000045725	1672.77	0.194995	0.240996	0.809123	0.418444	0.580243
ENSMUSG00000045928	41.6951	1.13695	0.780391	1.4569	0.145144	0.277898
ENSMUSG00000046058	3098.63	-0.392833	0.150127	-2.61666	0.00887935	0.0322134
ENSMUSG00000046093	148.156	-0.50865	0.493947	-1.02977	0.30312	0.474047
ENSMUSG00000046159	185.445	0.390567	0.480835	0.812268	0.416638	0.579194
ENSMUSG00000046192	793.123	-0.228169	0.216089	-1.0559	0.291012	0.46183
ENSMUSG00000046242	825.323	-0.48154	0.240951	-1.9985	0.045663	0.118033
ENSMUSG00000046372	36.7163	-0.789005	0.746644	-1.05674	0.290632	0.461697
ENSMUSG00000046378	55.2947	1.45186	0.623691	2.32784	0.0199204	0.061173
ENSMUSG00000046411	68.6163	-0.386287	0.594305	-0.649982	0.515704	0.657048
ENSMUSG00000046523	127.644	-0.38678	0.73377	-0.527114	0.598115	0.723757
ENSMUSG00000046532	104.165	1.28063	0.561606	2.28029	0.0225902	0.0676406
ENSMUSG00000046567	984.913	-0.560922	0.198782	-2.8218	0.00477553	0.0201196
ENSMUSG00000046573	1183.04	-0.240865	0.207361	-1.16157	0.245408	0.411211
ENSMUSG00000046610	66.3913	-0.890033	0.994462	-0.894989	0.370793	0.545181
ENSMUSG00000046667	153.626	-0.522248	0.514779	-1.01451	0.31034	0.482683
ENSMUSG00000046688	2722.77	-0.167838	0.206931	-0.811085	0.417317	0.579194
ENSMUSG00000046805	729.958	-4.39742	0.357286	-12.3079	8.21694e-35	1.0682e-32
ENSMUSG00000046886	1015.09	-0.567977	0.314896	-1.80369	0.0712792	0.164005
ENSMUSG00000046947	816.523	-0.194037	0.25215	-0.769529	0.441579	0.597972
ENSMUSG00000046961	1379.17	-0.147894	0.195888	-0.754993	0.450253	0.6039
ENSMUSG00000046991	46.4478	0.651926	0.817897	0.797075	0.425407	0.586769
ENSMUSG00000046997	312.668	-0.748964	0.322395	-2.32313	0.0201722	0.0615824
ENSMUSG00000047021	545.682	1.04611	0.350413	2.98538	0.0028323	0.0129193
ENSMUSG00000047044	2194.21	-0.649302	0.242029	-2.68275	0.00730199	0.0276483
ENSMUSG00000047084	4088.58	-0.294397	0.19015	-1.54824	0.121565	0.245016
ENSMUSG00000047094	770.87	0.226204	0.343886	0.657789	0.510674	0.653541
ENSMUSG00000047193	1893.71	1.8414	0.329337	5.59124	2.25455e-08	3.287e-07
ENSMUSG00000047228	358.78	0.211477	0.279705	0.756071	0.449607	0.603875
ENSMUSG00000047284	1211.21	0.479018	0.209762	2.28363	0.0223936	0.0673101
ENSMUSG00000047394	917.462	0.390986	0.232687	1.68031	0.0928973	0.201865
ENSMUSG00000047428	6241.22	0.231429	0.214011	1.08139	0.279524	0.448158
ENSMUSG00000047473	582.282	-0.078987	0.364593	-0.216645	0.828485	0.897903
ENSMUSG00000047507	75.4196	0.26448	0.78407	0.337317	0.735878	0.832465
ENSMUSG00000047586	18.3351	1.12222	1.02216	1.09789	0.272253	0.44012
ENSMUSG00000047604	1176.3	0.0287429	0.254017	0.113153	0.909909	0.945675
ENSMUSG00000047632	601.387	-0.584849	0.356309	-1.64141	0.100713	0.210606
ENSMUSG00000047636	1446.52	0.538717	0.257254	2.0941	0.036251	0.0976711
ENSMUSG00000047669	1753.81	0.0834407	0.178424	0.467654	0.640032	0.758206
ENSMUSG00000047747	1843.74	0.61421	0.249528	2.46149	0.0138362	0.0464183
ENSMUSG00000047844	1734.37	-0.498846	0.183977	-2.71146	0.00669881	0.025618
ENSMUSG00000047888	2713.4	0.462825	0.259116	1.78617	0.074072	0.168936
ENSMUSG00000047909	372.846	0.532707	0.264415	2.01466	0.0439401	0.114435
ENSMUSG00000047935	76.5937	1.12011	0.670144	1.67145	0.0946328	0.204187
ENSMUSG00000047986	992.129	0.0985063	0.249026	0.395567	0.692425	0.799543
ENSMUSG00000047990	109.1	-0.171519	0.545202	-0.314597	0.753068	0.843349
ENSMUSG00000048029	886.778	0.549313	0.247485	2.21958	0.0264475	0.0766881
ENSMUSG00000048040	3323.67	0.341701	0.154995	2.2046	0.0274822	0.0786647
ENSMUSG00000048065	368.909	0.167532	0.271635	0.616754	0.537397	0.675792
ENSMUSG00000048096	2392.92	0.606865	0.255737	2.37301	0.0176438	0.0561722
ENSMUSG00000048154	1292.01	1.13377	0.19629	5.77599	7.65017e-09	1.23034e-07
ENSMUSG00000048163	88.9908	-9.10988	1.56546	-5.8193	5.90951e-09	9.80727e-08
ENSMUSG00000048175	6055.43	-0.213915	0.188984	-1.13192	0.257668	0.426258
ENSMUSG00000048330	824.051	0.233714	0.260511	0.897138	0.369645	0.544006
ENSMUSG00000048347	159.092	1.80724	0.483071	3.74114	0.000183185	0.0011907
ENSMUSG00000048355	1056.55	0.108872	0.272267	0.399871	0.689251	0.79765
ENSMUSG00000048416	7842.66	-0.539228	0.194196	-2.77672	0.00549105	0.0220774
ENSMUSG00000048442	3062.9	0.0353461	0.170286	0.207569	0.835565	0.90144
ENSMUSG00000048445	275.185	0.0173151	0.390844	0.0443018	0.964664	0.975382
ENSMUSG00000048478	664.285	-0.263596	0.261285	-1.00885	0.313047	0.485924
ENSMUSG00000048482	18633.5	0.201662	0.122372	1.64794	0.0993651	0.20919
ENSMUSG00000048655	22.6427	2.23028	1.26891	1.75763	0.0788111	0.1769
ENSMUSG00000048699	115.924	0.330137	0.525047	0.628777	0.529495	0.668836
ENSMUSG00000048706	4480.05	-0.0321162	0.190425	-0.168656	0.866067	0.917843
ENSMUSG00000048782	2077.16	-0.17992	0.191643	-0.938828	0.347819	0.521228
ENSMUSG00000048967	339.781	-0.554613	0.441424	-1.25642	0.208965	0.365841
ENSMUSG00000048978	986.846	-0.409821	0.209783	-1.95355	0.0507542	0.127704
ENSMUSG00000048988	1969.62	0.14834	0.182662	0.812102	0.416733	0.579194
ENSMUSG00000049086	1293.68	-0.653587	0.175386	-3.72656	0.000194111	0.00125129
ENSMUSG00000049130	1114.98	-8.43011	1.2472	-6.75921	1.38742e-11	3.66845e-10
ENSMUSG00000049154	7245.46	-0.225123	0.149747	-1.50335	0.132748	0.261474
ENSMUSG00000049233	414.728	-1.1094	0.283845	-3.90849	9.28766e-05	0.000643945
ENSMUSG00000049281	417.585	0.297584	0.423112	0.703323	0.481855	0.630805
ENSMUSG00000049420	983.972	0.403664	0.190287	2.12134	0.033893	0.0925974
ENSMUSG00000049422	20162.6	-0.341633	0.148198	-2.30525	0.0211525	0.0644362
ENSMUSG00000049515	2985.87	0.160731	0.151038	1.06418	0.287247	0.457251
ENSMUSG00000049530	1156.07	-0.117729	0.198665	-0.592601	0.553448	0.689965
ENSMUSG00000049555	4717.58	0.375083	0.201131	1.86487	0.0622002	0.147466
ENSMUSG00000049571	1559.28	1.3493	0.224727	6.00417	1.92315e-09	3.48851e-08
ENSMUSG00000049659	7174.77	-0.250719	0.135954	-1.84414	0.0651626	0.153093
ENSMUSG00000049685	8829.8	0.878739	0.243371	3.61069	0.00030538	0.00188878
ENSMUSG00000049723	258.813	-10.6514	1.54816	-6.88003	5.98383e-12	1.76128e-10
ENSMUSG00000049796	136.218	0.253535	0.484967	0.522788	0.601122	0.725252
ENSMUSG00000049881	2242.19	-0.791428	0.187131	-4.22928	2.34443e-05	0.000189498
ENSMUSG00000049904	843.563	0.264793	0.228579	1.15843	0.246687	0.41291
ENSMUSG00000049999	120.177	1.29727	0.485075	2.67438	0.00748685	0.0281433
ENSMUSG00000050071	2775.06	-0.342233	0.193934	-1.76469	0.0776165	0.175227
ENSMUSG00000050122	792.842	0.0649829	0.312315	0.208068	0.835176	0.90144
ENSMUSG00000050334	281.493	0.993271	0.445022	2.23196	0.0256175	0.0745583
ENSMUSG00000050379	924.129	0.190964	0.312671	0.610751	0.541364	0.678881
ENSMUSG00000050505	30389.9	0.955774	0.151947	6.29019	3.17068e-10	6.42371e-09
ENSMUSG00000050549	3027.42	-0.477012	0.210141	-2.26996	0.02321	0.0692307
ENSMUSG00000050556	3224.55	0.300794	0.148251	2.02894	0.0424641	0.111661
ENSMUSG00000050640	426.608	-0.626704	0.285559	-2.19466	0.0281882	0.0799519
ENSMUSG00000050677	1372.12	-0.0146519	0.239211	-0.0612508	0.951159	0.970237
ENSMUSG00000050711	519.623	0.826427	0.360199	2.29436	0.0217696	0.0659429
ENSMUSG00000050875	8722.43	-0.311038	0.170954	-1.81942	0.0688471	0.159824
ENSMUSG00000050896	4788.08	0.408383	0.282722	1.44447	0.148606	0.281717
ENSMUSG00000050914	1247.44	0.0658643	0.212469	0.309995	0.756564	0.846051
ENSMUSG00000051007	2105.78	-0.455323	0.193728	-2.35032	0.0187573	0.0586402
ENSMUSG00000051036	2055.34	0.580142	0.190699	3.0422	0.00234859	0.0110024
ENSMUSG00000051041	1316.69	-0.392891	0.275391	-1.42667	0.153676	0.287802
ENSMUSG00000051098	844.924	-0.532633	0.249562	-2.13427	0.0328206	0.0899826
ENSMUSG00000051113	148.495	-0.0309525	0.427287	-0.0724397	0.942252	0.966412
ENSMUSG00000051169	267.658	-0.281249	0.327348	-0.859174	0.390245	0.559653
ENSMUSG00000051172	127.158	-2.00179	0.594973	-3.3645	0.000766813	0.00415842
ENSMUSG00000051236	6175.14	-0.115283	0.220937	-0.521792	0.601815	0.725527
ENSMUSG00000051359	2536.36	0.14296	0.20504	0.697231	0.485658	0.633467
ENSMUSG00000051439	837.369	-4.15608	0.302822	-13.7245	7.24293e-43	1.25544e-40
ENSMUSG00000051703	434.328	0.174096	0.296174	0.587817	0.556655	0.691765
ENSMUSG00000051890	1221.96	-0.821177	0.340497	-2.4117	0.0158783	0.0523681
ENSMUSG00000051998	23.2521	3.97406	1.81521	2.18932	0.0285739	0.0808988
ENSMUSG00000052142	101.832	-1.49832	0.755531	-1.98314	0.0473521	0.121296
ENSMUSG00000052305	1039.57	-7.62483	0.496033	-15.3716	2.53668e-53	6.59536e-51
ENSMUSG00000052336	151.083	-8.4264	1.47751	-5.70312	1.17634e-08	1.79911e-07
ENSMUSG00000052605	194.472	-0.413085	0.532859	-0.775225	0.438207	0.596132
ENSMUSG00000052727	7165.68	1.07081	0.209257	5.1172	3.10107e-07	3.5571e-06
ENSMUSG00000052730	437.683	0.185418	0.313482	0.591477	0.554201	0.689986
ENSMUSG00000052783	277.468	-0.407158	0.407469	-0.999236	0.31768	0.490675
ENSMUSG00000052861	438.072	1.96902	0.559	3.52241	0.000427646	0.002527
ENSMUSG00000052934	1292.42	-0.642251	0.265627	-2.41786	0.0156119	0.0517082
ENSMUSG00000052981	1246.07	0.121005	0.249028	0.485908	0.627032	0.748335
ENSMUSG00000053025	269.988	0.356212	0.407864	0.873359	0.382467	0.552756
ENSMUSG00000053063	257.904	-10.6438	1.48641	-7.16072	8.02529e-13	2.9115e-11
ENSMUSG00000053111	1142.11	-0.648684	0.254532	-2.54854	0.0108176	0.0376683
ENSMUSG00000053153	667.233	0.155509	0.421726	0.368744	0.712318	0.817672
ENSMUSG00000053158	129.137	-2.05245	0.499609	-4.10812	3.98889e-05	0.000297735
ENSMUSG00000053161	37.2787	-1.30474	0.866019	-1.50659	0.131915	0.261152
ENSMUSG00000053216	362.102	-0.159635	0.300126	-0.531895	0.594799	0.720409
ENSMUSG00000053441	234.185	1.39769	0.349294	4.00148	6.29468e-05	0.000452521
ENSMUSG00000053626	1177.56	0.966526	0.285954	3.38	0.000724847	0.00398156
ENSMUSG00000053783	1995.62	-0.708062	0.196472	-3.60388	0.000313503	0.00192545
ENSMUSG00000053930	1063.8	0.343029	0.196429	1.74632	0.0807554	0.179712
ENSMUSG00000053964	135.622	3.12545	0.501372	6.23379	4.55277e-10	8.99029e-09
ENSMUSG00000053965	1826.29	0.225814	0.186451	1.21111	0.225851	0.388027
ENSMUSG00000054013	2199.82	-0.127384	0.286492	-0.444634	0.656584	0.771289
ENSMUSG00000054021	618.403	-0.322624	0.308362	-1.04625	0.295445	0.46564
ENSMUSG00000054027	2469.67	0.376684	0.241116	1.56225	0.118229	0.23984
ENSMUSG00000054034	624.209	-0.0252956	0.239335	-0.105691	0.915827	0.94834
ENSMUSG00000054051	3263.34	0.181198	0.161996	1.11854	0.263338	0.432429
ENSMUSG00000054091	20622.3	-0.512062	0.138629	-3.69376	0.000220959	0.00140692
ENSMUSG00000054162	1505.12	0.773302	0.229298	3.37248	0.00074495	0.00406336
ENSMUSG00000054237	1168.13	-0.513191	0.264331	-1.94147	0.0522013	0.129672
ENSMUSG00000054383	124.352	-0.00400398	0.49242	-0.00813123	0.993512	0.995944
ENSMUSG00000054510	358.632	-0.771876	0.424	-1.82046	0.0686886	0.159693
ENSMUSG00000054514	61.7696	-0.911026	0.649629	-1.40238	0.160802	0.297923
ENSMUSG00000054580	27.9655	-1.85455	1.61535	-1.14808	0.250935	0.416889
ENSMUSG00000054708	1688.7	0.103431	0.17136	0.603588	0.546118	0.682542
ENSMUSG00000054910	266.389	0.375172	0.331734	1.13094	0.258078	0.426486
ENSMUSG00000055003	22278.9	0.220577	0.205607	1.07281	0.283356	0.45337
ENSMUSG00000055148	370.361	0.161027	0.289351	0.556511	0.577861	0.707067
ENSMUSG00000055312	38.5103	-1.29636	0.867122	-1.49502	0.13491	0.263935
ENSMUSG00000055541	187.097	-4.63761	0.790654	-5.86553	4.47692e-09	7.67472e-08
ENSMUSG00000055567	1004.63	0.809906	0.254289	3.18498	0.00144765	0.0072151
ENSMUSG00000055639	679.646	0.159164	0.245019	0.649599	0.515952	0.657048
ENSMUSG00000055692	1889.64	0.551889	0.187337	2.94597	0.00321942	0.0144319
ENSMUSG00000055782	308.693	-0.508549	0.349097	-1.45675	0.145184	0.277898
ENSMUSG00000055809	576.766	1.08497	0.26609	4.07747	4.55287e-05	0.000335023
ENSMUSG00000055895	859.326	-0.664213	0.237529	-2.79634	0.00516851	0.0212741
ENSMUSG00000056025	6.97975	3.81669	2.5914	1.47283	0.140796	0.272171
ENSMUSG00000056069	229.303	-2.52784	0.598188	-4.22582	2.38068e-05	0.000191436
ENSMUSG00000056215	578.122	0.0609188	0.394492	0.154423	0.877276	0.922204
ENSMUSG00000056296	1949.88	0.317032	0.220699	1.43649	0.150863	0.284923
ENSMUSG00000056394	410.017	1.14704	0.324542	3.53433	0.00040881	0.00242488
ENSMUSG00000056458	1085.92	0.164019	0.211317	0.776173	0.437647	0.596132
ENSMUSG00000056596	3946.83	-0.239148	0.196546	-1.21675	0.223699	0.385435
ENSMUSG00000056598	2699.22	0.223297	0.170877	1.30677	0.191291	0.342218
ENSMUSG00000056716	905.114	-0.299295	0.207271	-1.44398	0.148745	0.281717
ENSMUSG00000056752	386.696	1.30005	0.270855	4.7998	1.5882e-06	1.57809e-05
ENSMUSG00000056812	552.769	0.103519	0.24445	0.423479	0.671946	0.781682
ENSMUSG00000056888	79.7913	-8.95384	1.56847	-5.70864	1.13885e-08	1.75901e-07
ENSMUSG00000056895	5767.12	-0.371648	0.249182	-1.49147	0.135837	0.264222
ENSMUSG00000056899	260.049	-0.78559	0.32742	-2.39933	0.0164249	0.05327
ENSMUSG00000057069	2059.89	0.551845	0.154915	3.56224	0.000367698	0.00221471
ENSMUSG00000057133	1225.27	1.08574	0.190805	5.6903	1.26819e-08	1.90228e-07
ENSMUSG00000057176	1895.51	-0.0276712	0.177548	-0.155852	0.876149	0.922204
ENSMUSG00000057191	2272.42	0.508636	0.162922	3.12195	0.00179656	0.0087857
ENSMUSG00000057265	788.759	0.0791435	0.272175	0.290782	0.771218	0.857451
ENSMUSG00000057315	1071.89	-0.262651	0.235246	-1.1165	0.26421	0.432949
ENSMUSG00000057716	830.472	0.269021	0.228973	1.1749	0.240034	0.406572
ENSMUSG00000057816	741.242	-0.533666	0.32448	-1.64468	0.100036	0.210035
ENSMUSG00000057897	3831.51	-0.277969	0.192116	-1.44688	0.14793	0.281085
ENSMUSG00000058297	1834.09	0.41623	0.182432	2.28157	0.0225148	0.0675444
ENSMUSG00000058589	1213.12	-0.573636	0.176425	-3.25144	0.00114824	0.00589228
ENSMUSG00000058624	543.585	0.294702	0.384811	0.765837	0.443774	0.599902
ENSMUSG00000058715	2539.94	-5.917	1.38398	-4.27534	1.90845e-05	0.000155873
ENSMUSG00000058966	418.607	0.644118	0.318601	2.0217	0.043207	0.112903
ENSMUSG00000059022	8172.37	-0.570833	0.208619	-2.73625	0.0062143	0.0241753
ENSMUSG00000059273	714.227	0.939887	0.270463	3.47511	0.000510651	0.00297245
ENSMUSG00000059323	9362.37	-0.328244	0.173562	-1.89122	0.0585952	0.141111
ENSMUSG00000059325	5899.29	-0.452889	0.157383	-2.87762	0.00400688	0.0172197
ENSMUSG00000059326	381.202	-0.508498	0.413447	-1.2299	0.218735	0.378301
ENSMUSG00000059498	585.233	-10.3834	1.47273	-7.05044	1.78347e-12	5.91959e-11
ENSMUSG00000059518	2331.49	-0.525895	0.191239	-2.74993	0.00596079	0.0234819
ENSMUSG00000059708	724.656	0.093297	0.269298	0.346445	0.729008	0.826492
ENSMUSG00000059742	847.951	0.359318	0.210489	1.70706	0.0878108	0.193209
ENSMUSG00000059743	485.702	-0.299268	0.252132	-1.18695	0.235247	0.400203
ENSMUSG00000059834	942.171	-0.454215	0.23358	-1.94458	0.0518253	0.129149
ENSMUSG00000059854	517.102	1.70344	0.336524	5.06188	4.15148e-07	4.6704e-06
ENSMUSG00000060063	84.4241	-4.56324	0.765915	-5.95789	2.55523e-09	4.47883e-08
ENSMUSG00000060176	787.053	-1.61181	0.302892	-5.32142	1.02961e-07	1.32397e-06
ENSMUSG00000060180	273.843	0.777215	1.26764	0.613122	0.539796	0.677459
ENSMUSG00000060261	9152.98	0.250906	0.173891	1.44289	0.149052	0.281844
ENSMUSG00000060579	170.5	-0.486358	0.390103	-1.24674	0.212492	0.370792
ENSMUSG00000060586	1536.11	-1.86941	0.351367	-5.3204	1.03541e-07	1.32397e-06
ENSMUSG00000060798	996.42	-0.580785	0.193021	-3.00892	0.00262181	0.0121727
ENSMUSG00000060924	137.294	0.917128	0.547139	1.67622	0.0936942	0.203214
ENSMUSG00000060981	135.555	-1.04301	0.481088	-2.16803	0.0301564	0.0844595
ENSMUSG00000061046	1973.72	-0.171525	0.177959	-0.963846	0.335123	0.507565
ENSMUSG00000061298	170.253	-0.14594	0.497966	-0.293073	0.769466	0.857405
ENSMUSG00000061451	146.081	0.274657	0.417626	0.657662	0.510755	0.653541
ENSMUSG00000061601	503.093	1.80399	0.316476	5.70027	1.19621e-08	1.81173e-07
ENSMUSG00000061603	1256.63	0.20711	0.199207	1.03967	0.298494	0.469406
ENSMUSG00000061723	335.492	0.700098	0.338737	2.06679	0.038754	0.103219
ENSMUSG00000061751	266.86	1.16481	0.432245	2.6948	0.00704318	0.0267332
ENSMUSG00000061755	1979.64	0.9877	0.197692	4.99616	5.84821e-07	6.42479e-06
ENSMUSG00000061802	3697.24	0.13813	0.147326	0.937578	0.348461	0.521689
ENSMUSG00000061877	1657.49	0.0175498	0.310226	0.0565711	0.954887	0.971071
ENSMUSG00000062054	1070.31	-0.371928	0.191215	-1.94508	0.0517651	0.129149
ENSMUSG00000062154	2122.62	0.0142265	0.213845	0.0665272	0.946958	0.968692
ENSMUSG00000062252	9675.81	0.291109	0.131732	2.20985	0.0271158	0.0780455
ENSMUSG00000062372	16701	1.06233	0.2523	4.21057	2.54729e-05	0.000201714
ENSMUSG00000062444	10261.3	0.785583	0.192136	4.08867	4.3385e-05	0.000320761
ENSMUSG00000062515	137.703	-6.72606	1.00241	-6.70987	1.94793e-11	4.90123e-10
ENSMUSG00000062526	666.35	-0.0343537	0.248963	-0.137987	0.890251	0.931758
ENSMUSG00000062563	1002.86	0.194825	0.232495	0.837973	0.402046	0.572128
ENSMUSG00000062593	501.43	-5.80052	1.69343	-3.42531	0.000614094	0.00347096
ENSMUSG00000062778	423.25	-0.127069	0.300549	-0.422791	0.672448	0.781683
ENSMUSG00000062822	1054.01	0.0513948	0.241719	0.212622	0.831622	0.899674
ENSMUSG00000062859	924.808	0.163288	0.239568	0.681594	0.495496	0.643072
ENSMUSG00000062995	4801.98	0.192212	0.230328	0.834516	0.40399	0.572932
ENSMUSG00000063018	1080.47	-0.558903	0.233994	-2.38854	0.0169156	0.0544091
ENSMUSG00000063063	332.023	0.59092	0.351687	1.68025	0.0929095	0.201865
ENSMUSG00000063142	974.5	-0.171784	0.193259	-0.888884	0.374066	0.547387
ENSMUSG00000063145	1218.56	-0.0627441	0.192602	-0.325771	0.744597	0.838075
ENSMUSG00000063171	2626.73	-0.224362	0.154861	-1.44879	0.147396	0.280754
ENSMUSG00000063409	683.946	0.0659018	0.273972	0.240542	0.80991	0.884157
ENSMUSG00000063415	1038.55	0.289295	0.368295	0.785498	0.432162	0.593462
ENSMUSG00000063428	712.195	-0.686565	0.338472	-2.02842	0.0425171	0.111661
ENSMUSG00000063439	1914.45	-0.465459	0.166764	-2.79112	0.00525255	0.0214502
ENSMUSG00000063445	387.775	-0.515753	0.313892	-1.64309	0.100364	0.210159
ENSMUSG00000063446	19.4616	0.165194	1.74125	0.0948706	0.924418	0.954239
ENSMUSG00000063531	2199.15	0.994951	0.174278	5.709	1.1364e-08	1.75901e-07
ENSMUSG00000063548	1720.89	-0.759687	0.260518	-2.91607	0.00354476	0.015621
ENSMUSG00000063646	607.58	0.878515	0.292352	3.00499	0.00265592	0.0122945
ENSMUSG00000063698	512.066	0.397417	0.301426	1.31846	0.187351	0.33595
ENSMUSG00000063704	896.478	1.41174	0.285815	4.93934	7.83883e-07	8.37574e-06
ENSMUSG00000063919	1140.07	0.636478	0.253889	2.50692	0.012179	0.0416649
ENSMUSG00000064105	963.453	-0.258985	0.225011	-1.15099	0.249737	0.416889
ENSMUSG00000064181	17053.9	-0.27687	0.157056	-1.76288	0.0779212	0.175407
ENSMUSG00000064202	470.114	0.148722	0.345679	0.430231	0.667028	0.7777
ENSMUSG00000064225	1522.73	0.24313	0.247907	0.980728	0.326727	0.498722
ENSMUSG00000064264	691.727	-0.75384	0.351454	-2.14492	0.0319596	0.0880866
ENSMUSG00000064280	671.422	0.167248	0.304875	0.548579	0.583295	0.71089
ENSMUSG00000064307	590.095	-0.374346	0.280102	-1.33646	0.181398	0.329048
ENSMUSG00000065126	166.106	1.08928	0.387643	2.80999	0.00495426	0.0206097
ENSMUSG00000065147	18.4654	2.85979	1.18628	2.41072	0.0159212	0.0523989
ENSMUSG00000066036	2475.9	1.03745	0.162169	6.39736	1.58087e-10	3.3783e-09
ENSMUSG00000066196	1623.52	0.135617	0.192557	0.704294	0.48125	0.630805
ENSMUSG00000066279	3816.62	0.598159	0.301622	1.98314	0.0473517	0.121296
ENSMUSG00000066392	9614	1.68344	0.206408	8.15592	3.46533e-16	1.80197e-14
ENSMUSG00000066842	13.6224	1.91873	1.17766	1.62927	0.103255	0.215057
ENSMUSG00000066952	747.43	0.68361	0.227697	3.00228	0.00267969	0.0123678
ENSMUSG00000067199	560.015	-0.0367537	0.299835	-0.12258	0.90244	0.940418
ENSMUSG00000067219	1504.26	0.520288	0.210938	2.46655	0.0136423	0.0458665
ENSMUSG00000067567	539.195	0.233436	0.281709	0.828642	0.407307	0.574855
ENSMUSG00000067795	217.618	0.0748071	0.442554	0.169035	0.865769	0.917843
ENSMUSG00000067851	5790.22	0.272145	0.175261	1.55279	0.120472	0.243126
ENSMUSG00000067872	258.765	-1.21339	0.467369	-2.59621	0.00942589	0.0338032
ENSMUSG00000068011	10196.8	-0.0607406	0.152641	-0.39793	0.690682	0.798713
ENSMUSG00000068082	1578.06	-0.26307	0.205049	-1.28296	0.199505	0.352865
ENSMUSG00000068117	453.205	-0.0557875	0.348579	-0.160043	0.872848	0.920028
ENSMUSG00000068205	653.713	-0.22156	0.270862	-0.817981	0.413368	0.578864
ENSMUSG00000068394	408.194	-0.556908	0.314755	-1.76934	0.076838	0.174226
ENSMUSG00000068617	1041.28	-0.770887	0.326373	-2.36198	0.0181775	0.0574026
ENSMUSG00000069072	1145.11	0.674775	0.207657	3.24947	0.00115619	0.00591365
ENSMUSG00000069170	586.29	1.36	0.245485	5.54006	3.02359e-08	4.36741e-07
ENSMUSG00000069516	12495.4	-6.88759	1.15586	-5.95887	2.5399e-09	4.47883e-08
ENSMUSG00000069678	1102.32	-0.0788253	0.205905	-0.382825	0.70185	0.808631
ENSMUSG00000069733	769.091	0.252732	0.250727	1.008	0.313456	0.486075
ENSMUSG00000070000	923.308	0.468582	0.232678	2.01387	0.0440234	0.114461
ENSMUSG00000070167	57.8255	0.0876502	0.771108	0.113668	0.909501	0.945675
ENSMUSG00000070424	151.689	0.471651	0.536396	0.879295	0.379241	0.550341
ENSMUSG00000070476	267.76	0.150015	0.370449	0.404953	0.685512	0.793912
ENSMUSG00000070524	790.453	0.329348	0.337314	0.976385	0.328874	0.501019
ENSMUSG00000070565	9002.78	0.506359	0.197071	2.56942	0.0101869	0.0360353
ENSMUSG00000070574	34.7431	1.20773	0.803339	1.50339	0.132739	0.261474
ENSMUSG00000070576	2371.8	0.480533	0.232128	2.07012	0.0384408	0.10286
ENSMUSG00000070729	863.931	-0.0944981	0.325694	-0.290144	0.771706	0.857451
ENSMUSG00000070733	1091.91	0.928912	0.300392	3.09233	0.00198594	0.00952597
ENSMUSG00000070806	363.943	-0.212759	0.274739	-0.774404	0.438692	0.596132
ENSMUSG00000070823	220.484	-1.34767	0.382901	-3.51964	0.000432131	0.00254387
ENSMUSG00000070883	589.373	0.777678	0.327955	2.3713	0.0177258	0.0563183
ENSMUSG00000071054	2560.85	-0.00219871	0.220933	-0.00995193	0.99206	0.99589
ENSMUSG00000071073	736.111	-0.318215	0.225283	-1.41251	0.157799	0.293405
ENSMUSG00000071103	473.667	0.927367	0.304491	3.04563	0.00232193	0.0109103
ENSMUSG00000071265	78.2823	-1.35535	0.723998	-1.87204	0.0612016	0.145763
ENSMUSG00000071317	690.149	-0.199185	0.330101	-0.603407	0.546238	0.682542
ENSMUSG00000071324	660.083	0.622948	0.324868	1.91755	0.0551687	0.135533
ENSMUSG00000071379	3680.49	0.0534899	0.188486	0.283787	0.776574	0.860408
ENSMUSG00000071398	3755.64	-0.0991018	0.22391	-0.442598	0.658057	0.77187
ENSMUSG00000071550	367.069	-0.571251	0.434581	-1.31449	0.188683	0.337939
ENSMUSG00000071567	291.006	0.606819	0.305874	1.98389	0.0472685	0.121296
ENSMUSG00000071658	269.598	-0.442548	0.523043	-0.846103	0.397496	0.567331
ENSMUSG00000071715	154.169	-9.90113	1.53831	-6.43635	1.22378e-10	2.72728e-09
ENSMUSG00000072473	1334.04	-0.400817	0.203842	-1.96632	0.0492621	0.124958
ENSMUSG00000072594	3903.67	-0.510722	0.196184	-2.60328	0.00923367	0.0333438
ENSMUSG00000072662	2726.77	0.503518	0.186773	2.69588	0.00702033	0.0267115
ENSMUSG00000072663	710.366	0.468685	0.262155	1.78782	0.0738057	0.168575
ENSMUSG00000072772	1170.38	-0.351813	0.243677	-1.44377	0.148804	0.281717
ENSMUSG00000072809	75.8065	1.22953	0.542299	2.26725	0.0233751	0.0695897
ENSMUSG00000072847	118.26	0.120716	0.500606	0.24114	0.809446	0.884157
ENSMUSG00000072875	1346.3	-0.284438	0.203378	-1.39857	0.161943	0.299327
ENSMUSG00000072893	353.26	1.00644	0.384158	2.61985	0.00879684	0.0319885
ENSMUSG00000072966	1104.48	1.23869	0.20016	6.18851	6.07354e-10	1.16972e-08
ENSMUSG00000073043	724.924	0.434025	0.250921	1.72973	0.0836793	0.185426
ENSMUSG00000073067	533.92	0.223291	0.237198	0.941369	0.346516	0.519774
ENSMUSG00000073102	3315.48	0.405549	0.225169	1.80109	0.0716891	0.164706
ENSMUSG00000073421	2345.96	-3.27313	0.315989	-10.3584	3.83459e-25	3.32331e-23
ENSMUSG00000073437	62.7279	0.959308	0.630128	1.5224	0.127908	0.255489
ENSMUSG00000073489	251.596	-10.6106	1.53524	-6.91138	4.79963e-12	1.49748e-10
ENSMUSG00000073490	199.878	-10.278	1.50656	-6.82218	8.96704e-12	2.49796e-10
ENSMUSG00000073574	3531.8	-0.134366	0.191364	-0.702149	0.482586	0.631003
ENSMUSG00000073633	2354.64	-0.334855	0.230036	-1.45566	0.145486	0.278135
ENSMUSG00000073774	11849.2	-0.0644751	0.221021	-0.291715	0.770505	0.857451
ENSMUSG00000073792	596.954	1.12301	0.350053	3.20811	0.0013361	0.00674537
ENSMUSG00000073795	42.8891	0.276458	0.743312	0.371927	0.709947	0.81555
ENSMUSG00000073968	275.605	-0.733812	0.54719	-1.34105	0.179903	0.327478
ENSMUSG00000074217	817.481	0.245969	0.280254	0.877666	0.380125	0.55106
ENSMUSG00000074240	28267.3	0.0919411	0.187829	0.489493	0.624492	0.745948
ENSMUSG00000074256	20.8914	1.23424	1.02422	1.20506	0.228181	0.390309
ENSMUSG00000074264	145.45	1.98479	0.733329	2.70655	0.00679863	0.0259312
ENSMUSG00000074461	154.161	-0.878077	0.516662	-1.69952	0.0892211	0.195485
ENSMUSG00000074579	599.274	-0.179513	0.242979	-0.738801	0.460028	0.610115
ENSMUSG00000074604	63.2784	-0.748923	0.666972	-1.12287	0.261493	0.430759
ENSMUSG00000074622	625.386	-5.25656	0.469485	-11.1964	4.24437e-29	4.41415e-27
ENSMUSG00000074673	220.685	0.170413	0.469991	0.362588	0.716913	0.819329
ENSMUSG00000074678	1984.77	-0.313607	0.187531	-1.67229	0.0944667	0.204111
ENSMUSG00000074818	727.106	0.136431	0.41033	0.33249	0.739519	0.834493
ENSMUSG00000074872	111.835	-0.254785	0.498421	-0.511185	0.609221	0.732192
ENSMUSG00000074981	91.902	-0.336044	0.537065	-0.625704	0.531509	0.670836
ENSMUSG00000075025	131.655	-0.224348	0.463462	-0.48407	0.628336	0.748335
ENSMUSG00000075267	11134	-0.255425	0.173913	-1.46869	0.141916	0.27332
ENSMUSG00000075270	117.033	0.315004	0.543488	0.579597	0.562187	0.695524
ENSMUSG00000075271	812.984	0.224522	0.203938	1.10093	0.270926	0.438883
ENSMUSG00000075273	2603.84	0.324192	0.185795	1.74489	0.0810032	0.180007
ENSMUSG00000075314	2380.79	-0.747819	0.153073	-4.88537	1.03235e-06	1.08085e-05
ENSMUSG00000075334	2481.19	-0.210267	0.22498	-0.934602	0.349994	0.522138
ENSMUSG00000075370	158.613	-0.133296	0.616199	-0.216319	0.828739	0.897903
ENSMUSG00000075420	35.6422	1.16115	1.08993	1.06535	0.286719	0.457131
ENSMUSG00000075465	96.729	-1.32149	0.727308	-1.81696	0.0692236	0.159983
ENSMUSG00000075569	404.212	1.07465	0.475471	2.26018	0.0238099	0.070481
ENSMUSG00000076614	19.632	0.177661	1.06245	0.167219	0.867198	0.917978
ENSMUSG00000076617	13719	-0.361544	0.285084	-1.2682	0.204726	0.35982
ENSMUSG00000078161	5738.84	0.157836	0.180266	0.875571	0.381263	0.551735
ENSMUSG00000078307	6691.44	-0.0674697	0.215149	-0.313595	0.753828	0.843596
ENSMUSG00000078444	117.324	-0.433337	0.456993	-0.948235	0.34301	0.516501
ENSMUSG00000078451	764.887	0.184494	0.211698	0.871496	0.383484	0.553408
ENSMUSG00000078552	145.587	-0.0223983	0.428441	-0.0522787	0.958307	0.972647
ENSMUSG00000078566	16482	-0.400672	0.14334	-2.79525	0.00518589	0.0212894
ENSMUSG00000078627	17.2155	0.983231	1.25342	0.784441	0.432781	0.59379
ENSMUSG00000078630	2989.34	0.454641	0.148555	3.06041	0.00221031	0.0104488
ENSMUSG00000078695	2402.71	-0.529254	0.166562	-3.17752	0.00148538	0.00737959
ENSMUSG00000078851	2209.53	-0.10832	0.223409	-0.484852	0.627781	0.748335
ENSMUSG00000079259	299.325	-0.0265166	0.381581	-0.0694915	0.944598	0.967547
ENSMUSG00000079304	1365.71	-0.759891	0.245157	-3.09961	0.00193778	0.00933005
ENSMUSG00000079317	2929.29	-0.331883	0.185439	-1.78971	0.0735	0.168123
ENSMUSG00000079419	310.683	-10.9133	1.47514	-7.39817	1.38077e-13	5.66842e-12
ENSMUSG00000079457	113.87	-1.73389	0.658258	-2.63406	0.00843715	0.0310423
ENSMUSG00000079497	170.605	-0.270993	0.53565	-0.505915	0.612916	0.7355
ENSMUSG00000079502	1006.56	-0.389129	0.279931	-1.39009	0.164501	0.30262
ENSMUSG00000079508	1514.35	-0.539993	0.224353	-2.40689	0.016089	0.0528397
ENSMUSG00000079539	214.105	0.308559	0.511658	0.603056	0.546471	0.682542
ENSMUSG00000079554	56.686	-0.134318	0.627572	-0.214028	0.830525	0.899111
ENSMUSG00000079606	20.4485	0.501744	1.13368	0.442581	0.658069	0.77187
ENSMUSG00000079666	194.366	-0.0749054	0.422141	-0.177442	0.859162	0.915458
ENSMUSG00000080712	271.959	-0.480122	0.360585	-1.33151	0.183022	0.330838
ENSMUSG00000081113	2223.43	-0.969693	0.175878	-5.51343	3.51917e-08	5.0366e-07
ENSMUSG00000081185	79.1537	-1.02355	0.583358	-1.75458	0.0793318	0.177557
ENSMUSG00000081306	1143.24	-1.66662	0.401439	-4.1516	3.30156e-05	0.000253716
ENSMUSG00000081308	1037.84	-0.702839	0.248998	-2.82267	0.00476256	0.0201196
ENSMUSG00000081355	259.948	-0.260318	0.360584	-0.721934	0.470335	0.619175
ENSMUSG00000081540	549.334	0.0207043	0.229454	0.0902327	0.928102	0.956933
ENSMUSG00000081557	54.0866	-0.019382	0.731575	-0.0264935	0.978864	0.986272
ENSMUSG00000081597	26.7636	-0.829543	0.881039	-0.941551	0.346423	0.519774
ENSMUSG00000081750	258.154	-0.260452	0.391154	-0.665856	0.505503	0.650647
ENSMUSG00000081871	61.2777	-0.753826	0.592097	-1.27315	0.202966	0.358145
ENSMUSG00000081913	34.7937	-0.512493	0.786384	-0.651708	0.514589	0.656386
ENSMUSG00000082120	2375.64	-0.431275	0.16332	-2.64067	0.00827419	0.0305371
ENSMUSG00000082252	9.94192	1.51095	1.36613	1.10601	0.268723	0.436675
ENSMUSG00000082550	126.574	-0.662681	0.422255	-1.56938	0.116558	0.237068
ENSMUSG00000082715	349.458	-0.888181	0.325426	-2.72929	0.00634717	0.0246308
ENSMUSG00000082743	2364.21	-0.665835	0.239355	-2.78179	0.00540608	0.0218484
ENSMUSG00000082815	19.1156	2.22183	1.36553	1.62709	0.103719	0.215454
ENSMUSG00000082820	209.192	-0.34668	0.438477	-0.790647	0.42915	0.591408
ENSMUSG00000082872	307.278	-0.115721	0.397242	-0.291312	0.770813	0.857451
ENSMUSG00000082896	2574.85	-0.242448	0.26976	-0.898755	0.368783	0.54325
ENSMUSG00000083084	34.7326	-2.609	0.992639	-2.62835	0.00857997	0.0313741
ENSMUSG00000083240	900.003	-1.44745	0.285976	-5.06142	4.16145e-07	4.6704e-06
ENSMUSG00000083253	43.9268	-1.69136	0.846461	-1.99815	0.0457	0.118033
ENSMUSG00000083270	325.35	-0.30765	0.356748	-0.862374	0.388482	0.558555
ENSMUSG00000083282	3365.94	0.278303	0.189697	1.46709	0.14235	0.273818
ENSMUSG00000083594	17.0823	-1.51132	1.16317	-1.29931	0.193837	0.344402
ENSMUSG00000083657	76.0167	-0.866551	0.578215	-1.49867	0.13396	0.262535
ENSMUSG00000083860	23.8857	-0.850928	0.93719	-0.907957	0.363901	0.53809
ENSMUSG00000083879	65.2947	-0.94751	0.603417	-1.57024	0.116359	0.236972
ENSMUSG00000083899	5141.64	-0.289449	0.255316	-1.13369	0.256926	0.425482
ENSMUSG00000084331	148.413	-0.334959	0.410107	-0.816761	0.414065	0.579194
ENSMUSG00000084845	191.979	0.665551	0.511027	1.30238	0.192787	0.34332
ENSMUSG00000085006	43.0589	-0.959796	0.917476	-1.04613	0.295502	0.46564
ENSMUSG00000085218	125.019	-1.16358	0.471073	-2.47007	0.0135086	0.0455148
ENSMUSG00000085295	154.363	-6.86214	1.00209	-6.84786	7.49648e-12	2.12627e-10
ENSMUSG00000085334	38.8394	0.203884	1.04355	0.195375	0.845099	0.907817
ENSMUSG00000085396	343.742	2.11205	0.558547	3.78133	0.000155992	0.00103552
ENSMUSG00000085545	66.0825	0.512674	0.631927	0.811286	0.417201	0.579194
ENSMUSG00000085558	236.949	-0.278418	0.485461	-0.573512	0.566298	0.698912
ENSMUSG00000085735	124.836	0.271856	0.493569	0.550796	0.581773	0.709591
ENSMUSG00000085761	2244.67	-0.375138	0.222958	-1.68255	0.0924631	0.201456
ENSMUSG00000085881	327.68	0.153231	0.292238	0.524337	0.600044	0.724941
ENSMUSG00000085882	382.759	0.567374	0.384554	1.47541	0.140103	0.271167
ENSMUSG00000085900	172.989	-0.285865	0.39514	-0.723451	0.469403	0.61847
ENSMUSG00000086003	91.334	-0.381116	0.53878	-0.707368	0.479338	0.629433
ENSMUSG00000086158	1621.42	-0.39127	0.202563	-1.9316	0.0534091	0.131883
ENSMUSG00000086287	193.289	-0.109891	0.385838	-0.284812	0.775788	0.860149
ENSMUSG00000086328	266.872	0.0264164	0.349862	0.0755052	0.939813	0.96518
ENSMUSG00000086549	65.2524	1.10932	0.698945	1.58714	0.11248	0.229973
ENSMUSG00000086666	107.683	-0.617763	0.507879	-1.21636	0.223849	0.385435
ENSMUSG00000086691	603.608	-1.22942	0.261952	-4.69329	2.68851e-06	2.54187e-05
ENSMUSG00000086753	53.4864	0.474017	0.641721	0.738666	0.46011	0.610115
ENSMUSG00000086782	123.024	1.32587	0.511712	2.59106	0.00956819	0.0342348
ENSMUSG00000086848	2555.8	-0.336611	0.223153	-1.50843	0.131445	0.260551
ENSMUSG00000086851	189.325	-0.115903	0.608066	-0.190609	0.848832	0.909719
ENSMUSG00000086859	720.018	2.00929	0.289478	6.94105	3.8919e-12	1.23905e-10
ENSMUSG00000086863	242.131	-0.517968	0.443347	-1.16831	0.24268	0.408835
ENSMUSG00000086938	192.858	-0.712855	0.379962	-1.87612	0.0606385	0.144642
ENSMUSG00000086960	68.9737	-0.0164022	0.702407	-0.0233514	0.98137	0.987065
ENSMUSG00000087043	322.082	-1.01952	0.319303	-3.19296	0.00140823	0.00706379
ENSMUSG00000087056	228.804	0.433577	0.470751	0.921033	0.357033	0.53045
ENSMUSG00000087086	296.681	-0.274388	0.409645	-0.669819	0.502973	0.648889
ENSMUSG00000087100	40.8443	-0.341878	0.708427	-0.482587	0.629389	0.74893
ENSMUSG00000087107	213.294	-7.91553	1.10493	-7.16383	7.84536e-13	2.9115e-11
ENSMUSG00000087120	86.3961	-0.132792	0.609969	-0.217703	0.82766	0.897903
ENSMUSG00000087196	66.0865	-0.687963	1.17127	-0.587364	0.55696	0.691765
ENSMUSG00000087236	465.044	0.196537	0.278606	0.705429	0.480544	0.630486
ENSMUSG00000087341	31.557	2.23624	1.50181	1.48904	0.136478	0.265138
ENSMUSG00000087635	218.015	-1.43402	0.369313	-3.88295	0.000103198	0.000712341
ENSMUSG00000089255	15.3775	1.16571	1.1085	1.05161	0.292979	0.464479
ENSMUSG00000089672	295.271	-10.8407	1.49641	-7.24443	4.34257e-13	1.6936e-11
ENSMUSG00000089815	150.669	-0.410939	0.596848	-0.688515	0.491128	0.638467
ENSMUSG00000089929	83.5091	-9.01782	1.55497	-5.79934	6.65762e-09	1.08186e-07
ENSMUSG00000089937	22.9016	-0.052793	1.00558	-0.0525002	0.95813	0.972647
ENSMUSG00000089968	127.896	0.0784264	0.437061	0.17944	0.857592	0.914452
ENSMUSG00000089976	43.1406	-2.4729	0.903478	-2.73709	0.00619862	0.0241746
ENSMUSG00000089990	80.9526	0.075104	0.561461	0.133765	0.893588	0.933689
ENSMUSG00000089998	450.407	-0.524005	0.315787	-1.65936	0.0970428	0.206904
ENSMUSG00000090030	721.575	0.165719	0.367703	0.450687	0.652215	0.767653
ENSMUSG00000090083	568.035	-0.249545	0.287789	-0.86711	0.385882	0.555841
ENSMUSG00000090086	86.6844	2.2186	0.550133	4.03284	5.51061e-05	0.000397989
ENSMUSG00000090088	68.8947	-0.171728	0.575571	-0.298362	0.765427	0.854125
ENSMUSG00000090110	333.282	-0.493547	0.309327	-1.59555	0.110589	0.227297
ENSMUSG00000090223	4861.34	-0.370726	0.142697	-2.59799	0.00937719	0.033706
ENSMUSG00000090336	200.07	0.425019	0.463112	0.917745	0.358752	0.53199
ENSMUSG00000090610	2460.4	-0.511853	0.150345	-3.40453	0.000662785	0.00370108
ENSMUSG00000090631	32.1223	1.05769	0.88441	1.19592	0.231726	0.39594
ENSMUSG00000090877	6186.03	-0.730011	0.591557	-1.23405	0.217184	0.376453
ENSMUSG00000091002	370.711	-0.186752	0.319202	-0.585058	0.558508	0.693137
ENSMUSG00000091007	56.1392	-0.397488	0.660413	-0.601878	0.547255	0.682975
ENSMUSG00000091155	1103.41	-0.469333	0.292762	-1.60312	0.108908	0.224433
ENSMUSG00000091415	413.33	-0.218903	0.389221	-0.562412	0.573836	0.705123
ENSMUSG00000091510	112.156	-0.0236139	0.517459	-0.0456343	0.963602	0.975382
ENSMUSG00000091519	1646.08	0.602278	0.28076	2.14517	0.0319392	0.0880866
ENSMUSG00000091866	33.2905	-1.00834	0.846734	-1.19086	0.233708	0.398018
ENSMUSG00000091898	469.251	-0.923942	0.528376	-1.74865	0.0803524	0.179071
ENSMUSG00000091971	2425.22	-0.814431	0.390742	-2.08432	0.0371311	0.09987
ENSMUSG00000091985	191.538	1.1467	0.457642	2.50567	0.0122219	0.0417203
ENSMUSG00000092210	158.023	-0.267605	0.461743	-0.579554	0.562216	0.695524
ENSMUSG00000092274	4674.18	0.989205	0.274026	3.60989	0.000306321	0.00188878
ENSMUSG00000092300	16.8669	2.9557	1.86895	1.58148	0.113769	0.232303
ENSMUSG00000092486	1037.22	-0.323188	0.220932	-1.46284	0.143512	0.275503
ENSMUSG00000093483	79.2601	0.624247	0.576676	1.08249	0.279034	0.447833
ENSMUSG00000093651	774.289	-0.2573	0.208835	-1.23207	0.217923	0.377314
ENSMUSG00000093673	120.402	-0.990646	0.597552	-1.65784	0.0973497	0.206904
ENSMUSG00000093861	8.10155	-2.37649	2.15243	-1.1041	0.269551	0.437109
ENSMUSG00000094320	695.108	-1.03009	0.268652	-3.8343	0.000125922	0.000854078
ENSMUSG00000094500	2693.54	0.116056	0.153101	0.758032	0.448432	0.603875
ENSMUSG00000094686	1021.77	0.352561	0.270178	1.30492	0.191921	0.342951
ENSMUSG00000094893	930.486	0.815476	0.23609	3.4541	0.000552141	0.00316669
ENSMUSG00000095493	117.131	-0.423602	0.565126	-0.74957	0.453514	0.605202
ENSMUSG00000095654	951.231	-0.491547	0.214484	-2.29176	0.0219193	0.0662676
ENSMUSG00000096014	848.171	0.470796	0.300966	1.56428	0.117752	0.239183
ENSMUSG00000096054	1250.69	0.958361	0.348019	2.75376	0.00589149	0.0232677
ENSMUSG00000096141	169.181	-0.390118	0.476378	-0.818925	0.412829	0.578864
ENSMUSG00000096257	10770.7	0.169229	0.151773	1.11502	0.264843	0.433532
ENSMUSG00000096351	524.355	-0.248771	0.252858	-0.983839	0.325195	0.497357
ENSMUSG00000096375	107.774	-1.09429	0.466473	-2.34587	0.0189826	0.0589898
ENSMUSG00000096472	13432.9	-0.0210049	0.147991	-0.141933	0.887133	0.930059
ENSMUSG00000096847	266.825	-0.31124	0.468974	-0.663662	0.506907	0.651379
ENSMUSG00000096948	91.5587	-0.274915	0.510129	-0.538913	0.589947	0.716758
ENSMUSG00000097022	276.934	0.000386742	0.343455	0.00112603	0.999102	0.999102
ENSMUSG00000097033	29.7538	3.7654	1.16352	3.23621	0.00121129	0.0061551
ENSMUSG00000097080	174.912	0.291748	0.365417	0.798399	0.424639	0.586747
ENSMUSG00000097131	660.098	-0.485793	0.275938	-1.76051	0.0783209	0.176053
ENSMUSG00000097145	370.894	-0.287273	0.345914	-0.830477	0.406269	0.574855
ENSMUSG00000097326	2114.08	-0.734437	0.202417	-3.62834	0.000285254	0.00178713
ENSMUSG00000097331	28.579	1.1754	0.863675	1.36093	0.173534	0.317739
ENSMUSG00000097335	6.94817	1.61433	1.84058	0.87708	0.380443	0.55106
ENSMUSG00000097392	380.177	1.01299	0.50051	2.02392	0.0429781	0.112493
ENSMUSG00000097503	478.422	-1.14473	0.296154	-3.86531	0.000110946	0.000759105
ENSMUSG00000097527	100.06	-1.65581	0.79031	-2.09513	0.036159	0.0975919
ENSMUSG00000097566	157.224	0.778884	0.475831	1.63689	0.101653	0.212287
ENSMUSG00000097628	38.5299	1.14472	1.22242	0.936437	0.349048	0.522066
ENSMUSG00000097633	19.5921	1.08072	0.98727	1.09465	0.27367	0.441494
ENSMUSG00000097640	812.511	-0.431874	0.233689	-1.84807	0.064592	0.151981
ENSMUSG00000097668	163.016	0.168004	0.383865	0.437665	0.661629	0.773719
ENSMUSG00000097673	86.2219	-0.719614	0.718703	-1.00127	0.316698	0.489641
ENSMUSG00000097703	702.681	-0.679065	0.231513	-2.93316	0.00335526	0.0148711
ENSMUSG00000097744	42.5092	0.109608	0.844871	0.129734	0.896777	0.935767
ENSMUSG00000097767	143.194	2.36885	0.490118	4.83321	1.34346e-06	1.36091e-05
ENSMUSG00000097797	17.8416	3.50459	1.15507	3.03409	0.00241264	0.011235
ENSMUSG00000097974	351.306	-0.233501	0.316263	-0.738314	0.460324	0.610115
ENSMUSG00000097990	1517.67	0.358064	0.264791	1.35225	0.176294	0.321284
ENSMUSG00000098095	349.411	0.696191	0.446978	1.55755	0.119339	0.241464
ENSMUSG00000098108	36.1122	1.31834	0.791184	1.66629	0.0956552	0.204975
ENSMUSG00000098112	97.8552	-9.24781	1.57395	-5.87554	4.21469e-09	7.30546e-08
ENSMUSG00000098206	38.4257	-1.8295	1.03078	-1.77487	0.0759195	0.172645
ENSMUSG00000098506	101.175	0.176395	0.484204	0.3643	0.715634	0.818871
ENSMUSG00000098552	174.095	-0.235853	0.458079	-0.514874	0.606641	0.73078
ENSMUSG00000098590	9523.1	-0.17927	0.182154	-0.984168	0.325033	0.497357
ENSMUSG00000098702	725.287	-0.512363	0.272637	-1.87929	0.0602049	0.144048
ENSMUSG00000099553	648.799	-0.132514	0.289535	-0.457679	0.647183	0.764476
ENSMUSG00000099632	263.083	-0.162972	0.336742	-0.483967	0.628409	0.748335
ENSMUSG00000099655	263.518	-0.840199	0.406702	-2.06589	0.0388393	0.103219
ENSMUSG00000099974	126.216	-7.17788	1.12039	-6.40659	1.48813e-10	3.22428e-09
ENSMUSG00000100094	207.299	-1.46434	0.388362	-3.77054	0.000162892	0.0010677
ENSMUSG00000100213	232.034	0.348547	0.356554	0.977541	0.328301	0.500636
ENSMUSG00000100247	47.3367	-0.70125	0.777641	-0.901765	0.367182	0.541402
ENSMUSG00000100615	121.027	-0.236338	0.53701	-0.440099	0.659865	0.77336
ENSMUSG00000100632	30.2982	1.06961	0.810028	1.32047	0.186679	0.335506
ENSMUSG00000100714	70.5936	0.233738	0.695113	0.336259	0.736675	0.832763
ENSMUSG00000100916	114.964	0.704808	0.486083	1.44997	0.147066	0.280754
ENSMUSG00000101166	44.0707	1.06208	0.793235	1.33893	0.180595	0.327972
ENSMUSG00000101634	99.4394	0.221456	0.558306	0.396658	0.69162	0.799205
ENSMUSG00000101655	839.984	-0.329318	0.236013	-1.39534	0.162913	0.300407
ENSMUSG00000101834	174.08	-0.723027	0.373552	-1.93554	0.0529235	0.131049
ENSMUSG00000102037	60.7875	-8.56056	1.58163	-5.4125	6.21497e-08	8.34782e-07
ENSMUSG00000102187	3.44749	-4.41386	3.84005	-1.14943	0.25038	0.416889
ENSMUSG00000102215	61.1708	-1.57358	0.702493	-2.23999	0.0250916	0.0733012
ENSMUSG00000102386	249.244	-3.02495	0.612405	-4.93945	7.83416e-07	8.37574e-06
ENSMUSG00000102414	0.466275	1.37102	4.55648	0.300894	0.763495	0.852579
ENSMUSG00000102498	33.4631	1.95186	1.30656	1.49389	0.135204	0.263935
ENSMUSG00000102553	18.395	1.1951	1.31849	0.906419	0.364714	0.538783
ENSMUSG00000102571	11.7168	-1.23365	1.39103	-0.88686	0.375155	0.547973
ENSMUSG00000102609	29.8189	-0.1366	0.847733	-0.161135	0.871987	0.920028
ENSMUSG00000102649	60.5616	-1.80695	0.858052	-2.10587	0.0352156	0.095708
ENSMUSG00000102680	32.7335	-1.38678	0.873705	-1.58724	0.112459	0.229973
ENSMUSG00000102840	125.465	-0.165282	0.476737	-0.346694	0.728821	0.826492
ENSMUSG00000103108	676.091	0.190766	0.274484	0.695	0.487056	0.634759
ENSMUSG00000103183	118.027	-0.855966	0.517344	-1.65454	0.0980179	0.207473
ENSMUSG00000103476	98.2297	-0.405781	0.523336	-0.775374	0.438119	0.596132
ENSMUSG00000103499	186.751	0.821231	0.366327	2.2418	0.0249745	0.073096
ENSMUSG00000103523	515.401	-0.24024	0.320254	-0.750155	0.453161	0.605202
ENSMUSG00000103558	35.0756	-3.23813	1.18727	-2.72737	0.0063842	0.024713
ENSMUSG00000103620	23.2117	1.31152	1.03224	1.27055	0.203888	0.358991
ENSMUSG00000103711	498.312	-0.255484	0.265748	-0.961376	0.336363	0.508949
ENSMUSG00000103753	21.9804	-0.00925817	1.07419	-0.00861871	0.993123	0.995944
ENSMUSG00000104011	350.115	0.319088	0.288233	1.10705	0.268274	0.436675
ENSMUSG00000104104	26.4961	-4.33724	1.39293	-3.11376	0.0018472	0.00897703
ENSMUSG00000104164	8.39527	2.4256	1.82979	1.32562	0.184966	0.333195
ENSMUSG00000104195	138.202	-1.05848	0.49281	-2.14785	0.0317258	0.0877521
ENSMUSG00000104682	65.5501	-0.497324	1.00353	-0.495575	0.620194	0.74195
ENSMUSG00000104882	89.2944	-0.947371	0.517906	-1.82923	0.0673645	0.157318
ENSMUSG00000104935	176.767	-1.4722	0.764241	-1.92636	0.0540597	0.133115
ENSMUSG00000105008	50.7668	-0.522923	0.701487	-0.745448	0.456001	0.607482
ENSMUSG00000105146	82.4062	-0.755645	0.607985	-1.24287	0.213916	0.372443
ENSMUSG00000105195	287.734	-0.576251	0.34773	-1.65718	0.0974834	0.206904
ENSMUSG00000105284	152.443	0.0298215	0.499674	0.059682	0.952409	0.970237
ENSMUSG00000105419	59.3182	1.42023	0.835011	1.70086	0.0889697	0.195208
ENSMUSG00000105734	798.92	0.138538	0.250218	0.553671	0.579804	0.708296
ENSMUSG00000105787	156.672	-0.54914	0.409999	-1.33937	0.180451	0.327972
ENSMUSG00000106093	36.0589	-0.127215	0.761772	-0.166999	0.867371	0.917978
ENSMUSG00000106383	71.415	1.26393	0.883927	1.4299	0.152745	0.287087
ENSMUSG00000106483	334.528	0.284636	0.428726	0.663912	0.506747	0.651379
ENSMUSG00000106499	246.966	-0.219221	0.397125	-0.55202	0.580935	0.709122
ENSMUSG00000106535	72.918	-0.0426485	0.620798	-0.0686994	0.945229	0.967557
ENSMUSG00000106604	86.9656	-1.21654	0.73143	-1.66324	0.0962651	0.205973
ENSMUSG00000106678	17.7664	2.52891	1.62762	1.55375	0.120245	0.242982
ENSMUSG00000106683	23.9457	1.77677	1.0319	1.72185	0.0850975	0.188301
ENSMUSG00000106803	106.815	-0.46038	0.458624	-1.00383	0.315462	0.488214
ENSMUSG00000107022	130.027	0.200635	0.489864	0.409572	0.68212	0.791746
ENSMUSG00000107121	63.2048	-1.14907	0.833968	-1.37784	0.168253	0.308618
ENSMUSG00000107167	3123.87	0.660632	0.177992	3.71158	0.000205967	0.00132226
ENSMUSG00000107428	11.7049	2.35179	1.26803	1.85468	0.0636416	0.150198
ENSMUSG00000107449	47.1397	-2.26899	0.863376	-2.62805	0.00858767	0.0313741
ENSMUSG00000107600	84.1254	-0.815034	0.550894	-1.47948	0.139013	0.269727
ENSMUSG00000107741	323.492	-0.164191	0.347898	-0.471952	0.636961	0.75621
ENSMUSG00000107760	88.0848	0.533051	0.682553	0.780966	0.434823	0.596066
ENSMUSG00000107836	33.0356	0.159835	0.904325	0.176745	0.859709	0.915458
ENSMUSG00000108125	29.777	-0.821343	0.83606	-0.982398	0.325904	0.497953
ENSMUSG00000108249	46.834	-2.12636	0.818443	-2.59806	0.00937532	0.033706
ENSMUSG00000108311	56.4265	0.905733	0.606661	1.49298	0.135442	0.263935
ENSMUSG00000108314	182.835	-0.606122	0.398973	-1.51921	0.128711	0.256108
ENSMUSG00000108398	8043.54	-0.0663387	0.169423	-0.391556	0.695386	0.802369
ENSMUSG00000108431	61.8777	0.878321	0.577207	1.52168	0.12809	0.255525
ENSMUSG00000108483	16.4827	1.13722	1.0829	1.05017	0.293642	0.465057
ENSMUSG00000108866	38.0735	0.0412128	0.91266	0.0451568	0.963982	0.975382
ENSMUSG00000108970	46.4465	-0.445438	0.718447	-0.620002	0.535257	0.673931
ENSMUSG00000109104	27.2327	0.148581	0.920293	0.16145	0.871739	0.920028
ENSMUSG00000109181	127.313	-0.211921	0.493875	-0.429099	0.667851	0.778079
ENSMUSG00000109209	24.3568	1.81099	1.18137	1.53296	0.125287	0.250895
ENSMUSG00000109228	1533.07	-0.517504	0.230042	-2.24961	0.0244739	0.0719006
ENSMUSG00000109392	1294.63	-0.169933	0.188159	-0.903134	0.366455	0.540842
ENSMUSG00000109446	971.164	1.18843	0.231537	5.13278	2.85491e-07	3.29901e-06
ENSMUSG00000109484	109.679	-0.888639	0.451909	-1.96641	0.0492512	0.124958
ENSMUSG00000109572	33.0207	-1.72966	0.964882	-1.79261	0.0730352	0.167305
ENSMUSG00000109582	228.619	0.428741	0.355084	1.20744	0.227264	0.389556
ENSMUSG00000109599	206.179	-0.719669	0.444156	-1.62031	0.105166	0.218164
ENSMUSG00000109695	11.2781	1.23017	1.31654	0.934395	0.3501	0.522138
ENSMUSG00000109829	82.5939	0.165956	0.625926	0.265138	0.790903	0.869492
ENSMUSG00000109894	327.175	-0.911427	0.315643	-2.88752	0.00388291	0.0168259
ENSMUSG00000110020	127.81	-0.818691	0.490889	-1.66777	0.0953611	0.204626
ENSMUSG00000110058	51.8314	-0.114153	0.845634	-0.134991	0.892619	0.933302
ENSMUSG00000110138	98.5614	-0.401077	0.610473	-0.656994	0.511185	0.653541
ENSMUSG00000110239	23.1638	0.781745	1.40484	0.556467	0.577891	0.707067
ENSMUSG00000110266	796.907	1.69534	0.291437	5.81717	5.98534e-09	9.82855e-08
ENSMUSG00000110303	553.821	-0.226607	0.272706	-0.830955	0.405999	0.574855
ENSMUSG00000110599	107.901	0.029111	0.622428	0.0467701	0.962696	0.975382
ENSMUSG00000110639	2716.37	-0.247824	0.280719	-0.882821	0.377333	0.549617
ENSMUSG00000110654	36.2336	-0.803966	0.831935	-0.966381	0.333854	0.506134
tg_CRE-ERT2	1000.9	0.177403	0.263443	0.673401	0.500692	0.647125
tg_DsRed	339.054	0.273359	0.276931	0.987102	0.323593	0.497345
tg_beta-lac	106.41	1.69144	0.471048	3.59081	0.000329657	0.00200885

## Sheet: A_sigGenes in sfHC
ensembl_gene_id	baseMean	log2FoldChange	lfcSE	stat	pvalue	padj
ENSMUSG00000001918	1666.2	1.24797	0.218372	5.71489	1.1e-08	1.73e-07
ENSMUSG00000002028	1303.83	1.02588	0.248344	4.13087	3.61e-05	0.000276354
ENSMUSG00000002265	949.071	1.17557	0.258445	4.54862	5.4e-06	4.96e-05
ENSMUSG00000006005	3061.49	1.24642	0.228584	5.45281	4.96e-08	6.84e-07
ENSMUSG00000006711	318.224	1.42027	0.299895	4.7359	2.18e-06	2.11e-05
ENSMUSG00000008153	1183.63	1.30395	0.329497	3.95739	7.58e-05	0.000535694
ENSMUSG00000012819	828.456	1.81557	0.240361	7.55351	4.24e-14	1.89e-12
ENSMUSG00000014773	1795.43	1.51107	0.211821	7.13372	9.77e-13	3.32e-11
ENSMUSG00000015652	225.016	1.02113	0.351481	2.90522	0.00366994	0.0159919
ENSMUSG00000016028	632.047	1.22216	0.271269	4.50534	6.63e-06	5.95e-05
ENSMUSG00000017740	123.51	2.02366	0.590323	3.42806	0.000607922	0.00344858
ENSMUSG00000018707	2526.58	1.41565	0.226926	6.23837	4.42e-10	8.84e-09
ENSMUSG00000018800	3499.22	1.29914	0.197933	6.56354	5.25e-11	1.24e-09
ENSMUSG00000020014	623.493	1.01423	0.352447	2.87768	0.00400616	0.0172197
ENSMUSG00000020220	606.162	1.1656	0.315247	3.69742	0.000217805	0.00139252
ENSMUSG00000020752	566.495	1.51326	0.285924	5.29254	1.21e-07	1.47e-06
ENSMUSG00000021495	349.798	1.06418	0.304238	3.49786	0.000469013	0.0027506
ENSMUSG00000021640	15.7711	5.47466	2.20893	2.47842	0.0131964	0.0446731
ENSMUSG00000022000	1882.71	1.18693	0.251245	4.7242	2.31e-06	2.2e-05
ENSMUSG00000022194	515.279	1.45334	0.338306	4.29592	1.74e-05	0.000143594
ENSMUSG00000022262	1172.11	1.73147	0.348534	4.96788	6.77e-07	7.33e-06
ENSMUSG00000022324	252.477	1.12537	0.393819	2.85759	0.00426874	0.0182445
ENSMUSG00000022756	3487.53	1.15571	0.178215	6.48488	8.88e-11	2.07e-09
ENSMUSG00000022871	158.028	1.15213	0.468812	2.45755	0.0139888	0.0468295
ENSMUSG00000023033	268.689	1.05137	0.380687	2.76178	0.00574879	0.0228778
ENSMUSG00000023473	383.159	1.84989	0.34309	5.39186	6.97e-08	9.22e-07
ENSMUSG00000024186	814.742	1.31774	0.294981	4.46722	7.92e-06	7.02e-05
ENSMUSG00000024713	1312.84	1.17633	0.246726	4.76776	1.86e-06	1.83e-05
ENSMUSG00000026131	2570.24	1.24759	0.185003	6.74364	1.54e-11	4.02e-10
ENSMUSG00000026204	87.0133	1.60156	0.606554	2.64042	0.00828024	0.0305371
ENSMUSG00000026609	621.07	1.92756	0.319141	6.03984	1.54e-09	2.86e-08
ENSMUSG00000026640	1134.18	1.16439	0.239147	4.86893	1.12e-06	1.17e-05
ENSMUSG00000026980	867.808	1.58886	0.319568	4.9719	6.63e-07	7.23e-06
ENSMUSG00000028080	1572.66	1.08179	0.262312	4.12406	3.72e-05	0.000283279
ENSMUSG00000028106	873.424	1.04966	0.244733	4.28899	1.79e-05	0.000147369
ENSMUSG00000028782	727.8	1.09318	0.229571	4.76184	1.92e-06	1.87e-05
ENSMUSG00000028977	1019.77	1.39441	0.316491	4.40583	1.05e-05	9.18e-05
ENSMUSG00000029027	137.518	1.46935	0.439369	3.34423	0.000825113	0.00440814
ENSMUSG00000029061	196.996	1.22135	0.391754	3.11763	0.00182311	0.00888766
ENSMUSG00000029714	398.79	1.27205	0.358227	3.55095	0.000383838	0.00230303
ENSMUSG00000029765	6378.14	1.14158	0.210966	5.41119	6.26e-08	8.35e-07
ENSMUSG00000030330	11.7572	3.90136	1.46636	2.66058	0.00780072	0.0291127
ENSMUSG00000030376	334.415	1.1655	0.414163	2.81411	0.00489132	0.020457
ENSMUSG00000030683	173.84	2.0754	0.449956	4.61246	3.98e-06	3.72e-05
ENSMUSG00000032796	96.3629	2.0174	0.552315	3.65262	0.000259579	0.00163283
ENSMUSG00000032908	330.264	1.59797	0.532808	2.99915	0.00270736	0.012422
ENSMUSG00000032968	260.831	1.19881	0.370373	3.23677	0.00120889	0.0061551
ENSMUSG00000033177	414.915	1.26021	0.355238	3.54749	0.000388915	0.00232455
ENSMUSG00000033276	563.972	1.26428	0.300844	4.20245	2.64e-05	0.000206986
ENSMUSG00000033498	2064.14	1.00719	0.196069	5.1369	2.79e-07	3.25e-06
ENSMUSG00000034427	3240.69	1.68429	0.159396	10.5667	4.25e-26	3.9e-24
ENSMUSG00000034799	204.626	1.49048	0.549711	2.71139	0.0067001	0.025618
ENSMUSG00000035458	55.4952	2.27691	0.821094	2.77302	0.00555381	0.0222723
ENSMUSG00000036551	504.268	1.57267	0.303297	5.18527	2.16e-07	2.55e-06
ENSMUSG00000036766	5844.42	1.30294	0.201302	6.47252	9.64e-11	2.21e-09
ENSMUSG00000037428	688.923	1.13058	0.333201	3.39309	0.000691083	0.00383661
ENSMUSG00000037646	544.348	1.41944	0.444487	3.19344	0.00140589	0.00706379
ENSMUSG00000038011	114.723	2.57274	0.847745	3.03481	0.0024069	0.011235
ENSMUSG00000038271	424.311	1.03983	0.270559	3.84325	0.000121413	0.000827094
ENSMUSG00000038453	740.723	1.19565	0.375106	3.18751	0.00143504	0.00717519
ENSMUSG00000038486	1551.92	1.11247	0.209454	5.31127	1.09e-07	1.37e-06
ENSMUSG00000038664	892.135	1.08509	0.329777	3.29039	0.00100049	0.00525512
ENSMUSG00000038738	275.885	1.56944	0.404777	3.8773	0.000105623	0.000725868
ENSMUSG00000039307	332.943	1.22694	0.41636	2.94684	0.00321044	0.0144319
ENSMUSG00000039542	1164.21	1.16599	0.21195	5.50128	3.77e-08	5.35e-07
ENSMUSG00000039683	824.063	1.0751	0.229559	4.68332	2.82e-06	2.65e-05
ENSMUSG00000039801	854.259	1.03603	0.306031	3.38537	0.000710813	0.00393216
ENSMUSG00000040407	7244.19	1.72091	0.207872	8.27871	1.25e-16	6.7e-15
ENSMUSG00000041147	185.849	1.03341	0.415359	2.488	0.0128462	0.0437557
ENSMUSG00000041268	1128.35	1.23293	0.302821	4.07147	4.67e-05	0.000342151
ENSMUSG00000041762	4856.54	1.06415	0.149181	7.13331	9.8e-13	3.32e-11
ENSMUSG00000042581	1009.41	1.50287	0.205216	7.32335	2.42e-13	9.67e-12
ENSMUSG00000042647	184.577	1.19501	0.41085	2.90863	0.00363012	0.0158969
ENSMUSG00000042678	2758.57	1.12842	0.229462	4.9177	8.76e-07	9.29e-06
ENSMUSG00000043020	1759.36	1.20142	0.18631	6.44852	1.13e-10	2.55e-09
ENSMUSG00000043843	181.037	1.58045	0.442272	3.57349	0.000352254	0.00212991
ENSMUSG00000044254	870.728	1.46244	0.219307	6.66844	2.59e-11	6.4e-10
ENSMUSG00000045039	2638.7	1.39786	0.231668	6.03389	1.6e-09	2.94e-08
ENSMUSG00000045482	1047.44	1.18391	0.275359	4.2995	1.71e-05	0.000142044
ENSMUSG00000047021	545.682	1.04611	0.350413	2.98538	0.0028323	0.0129193
ENSMUSG00000047193	1893.71	1.8414	0.329337	5.59124	2.25e-08	3.29e-07
ENSMUSG00000048154	1292.01	1.13377	0.19629	5.77599	7.65e-09	1.23e-07
ENSMUSG00000048347	159.092	1.80724	0.483071	3.74114	0.000183185	0.0011907
ENSMUSG00000049571	1559.28	1.3493	0.224727	6.00417	1.92e-09	3.49e-08
ENSMUSG00000049999	120.177	1.29727	0.485075	2.67438	0.00748684	0.0281433
ENSMUSG00000052727	7165.68	1.07081	0.209257	5.1172	3.1e-07	3.56e-06
ENSMUSG00000052861	438.072	1.96902	0.559	3.52241	0.000427646	0.002527
ENSMUSG00000053441	234.185	1.39769	0.349294	4.00148	6.29e-05	0.000452521
ENSMUSG00000053964	135.622	3.12545	0.501372	6.23379	4.55e-10	8.99e-09
ENSMUSG00000055809	576.766	1.08497	0.26609	4.07747	4.55e-05	0.000335023
ENSMUSG00000056394	410.017	1.14704	0.324542	3.53433	0.00040881	0.00242488
ENSMUSG00000056752	386.696	1.30005	0.270855	4.7998	1.59e-06	1.58e-05
ENSMUSG00000057133	1225.27	1.08574	0.190805	5.6903	1.27e-08	1.9e-07
ENSMUSG00000059854	517.102	1.70344	0.336524	5.06188	4.15e-07	4.67e-06
ENSMUSG00000061601	503.093	1.80399	0.316476	5.70027	1.2e-08	1.81e-07
ENSMUSG00000061751	266.86	1.16481	0.432245	2.6948	0.00704318	0.0267332
ENSMUSG00000062372	16701	1.06233	0.2523	4.21057	2.55e-05	0.000201714
ENSMUSG00000063704	896.478	1.41174	0.285815	4.93934	7.84e-07	8.38e-06
ENSMUSG00000065126	166.106	1.08928	0.387643	2.80999	0.00495426	0.0206097
ENSMUSG00000066036	2475.9	1.03745	0.162169	6.39736	1.58e-10	3.38e-09
ENSMUSG00000066392	9614	1.68344	0.206408	8.15592	3.47e-16	1.8e-14
ENSMUSG00000069170	586.29	1.36	0.245485	5.54006	3.02e-08	4.37e-07
ENSMUSG00000072893	353.26	1.00644	0.384158	2.61985	0.00879684	0.0319885
ENSMUSG00000072966	1104.48	1.23869	0.20016	6.18851	6.07e-10	1.17e-08
ENSMUSG00000073792	596.954	1.12301	0.350053	3.20811	0.0013361	0.00674536
ENSMUSG00000074264	145.45	1.98479	0.733329	2.70655	0.00679863	0.0259312
ENSMUSG00000085396	343.742	2.11205	0.558547	3.78133	0.000155992	0.00103552
ENSMUSG00000086782	123.024	1.32587	0.511712	2.59106	0.00956819	0.0342348
ENSMUSG00000086859	720.018	2.00929	0.289478	6.94105	3.89e-12	1.24e-10
ENSMUSG00000090086	86.6844	2.2186	0.550133	4.03284	5.51e-05	0.000397989
ENSMUSG00000091985	191.538	1.1467	0.457642	2.50567	0.0122219	0.0417203
ENSMUSG00000097033	29.7538	3.7654	1.16352	3.23621	0.00121129	0.0061551
ENSMUSG00000097767	143.194	2.36885	0.490118	4.83321	1.34e-06	1.36e-05
ENSMUSG00000097797	17.8416	3.50459	1.15507	3.03409	0.00241264	0.011235
ENSMUSG00000109446	971.164	1.18843	0.231537	5.13278	2.85e-07	3.3e-06
ENSMUSG00000110266	796.907	1.69534	0.291437	5.81717	5.99e-09	9.83e-08
tg_beta-lac	106.41	1.69144	0.471048	3.59081	0.000329657	0.00200884

## Sheet: A_sigGenes in wtHC
ensembl_gene_id	baseMean	log2FoldChange	lfcSE	stat	pvalue	padj
ENSMUSG00000000682	525.627	-6.21664	1.55934	-3.98671	6.7e-05	0.000477225
ENSMUSG00000000982	633.043	-6.10419	0.426879	-14.2996	2.2e-46	4.29e-44
ENSMUSG00000001128	127.153	-2.84868	0.867731	-3.2829	0.00102744	0.00532492
ENSMUSG00000001348	171.43	-10.0552	1.51269	-6.64722	2.99e-11	7.28e-10
ENSMUSG00000002111	446.277	-6.0491	0.529427	-11.4257	3.11e-30	3.47e-28
ENSMUSG00000002944	1845.49	-9.3863	1.22083	-7.68845	1.49e-14	7.26e-13
ENSMUSG00000003206	54.065	-2.51814	0.766039	-3.28722	0.00101181	0.00529673
ENSMUSG00000003283	248.43	-5.72309	1.36169	-4.20293	2.63e-05	0.000206986
ENSMUSG00000004709	58.0829	-8.49684	1.63468	-5.19788	2.02e-07	2.4e-06
ENSMUSG00000004730	566.855	-7.07884	1.33675	-5.29556	1.19e-07	1.46e-06
ENSMUSG00000015340	480.568	-5.95323	0.617625	-9.63889	5.48e-22	4.27e-20
ENSMUSG00000015355	376.625	-6.48506	1.34885	-4.80786	1.53e-06	1.53e-05
ENSMUSG00000015568	1741.41	-7.85929	1.62292	-4.84269	1.28e-06	1.31e-05
ENSMUSG00000015852	276.339	-10.7457	1.55822	-6.89613	5.34e-12	1.63e-10
ENSMUSG00000015947	1237.46	-12.9071	1.47057	-8.77692	1.68e-18	1.05e-16
ENSMUSG00000015950	291.96	-1.33693	0.529879	-2.52308	0.0116334	0.0400619
ENSMUSG00000018930	1169.96	-7.47874	1.55335	-4.8146	1.47e-06	1.48e-05
ENSMUSG00000019122	814.909	-7.03371	0.481753	-14.6002	2.8e-48	6.24e-46
ENSMUSG00000019876	142.276	-9.78607	1.53568	-6.37248	1.86e-10	3.92e-09
ENSMUSG00000019987	439.228	-5.49365	0.610763	-8.99473	2.37e-19	1.68e-17
ENSMUSG00000021188	3763.9	-1.08812	0.352061	-3.09071	0.00199679	0.00952597
ENSMUSG00000021234	244.327	-1.16408	0.375323	-3.10155	0.00192512	0.00929779
ENSMUSG00000021423	496.711	-7.06158	1.29659	-5.44626	5.14e-08	7.04e-07
ENSMUSG00000021886	110.103	-9.41585	1.52446	-6.1765	6.55e-10	1.25e-08
ENSMUSG00000021998	719.302	-8.0329	1.07796	-7.45196	9.2e-14	3.88e-12
ENSMUSG00000022014	97.7031	-9.24243	1.58505	-5.83099	5.51e-09	9.24e-08
ENSMUSG00000022148	154.97	-3.19705	0.602384	-5.30732	1.11e-07	1.39e-06
ENSMUSG00000022225	89.5397	-9.11874	1.55623	-5.85952	4.64e-09	7.87e-08
ENSMUSG00000022831	222.747	-10.4322	1.49232	-6.99061	2.74e-12	8.9e-11
ENSMUSG00000023992	828.867	-8.28815	0.65149	-12.7218	4.47e-37	6.98e-35
ENSMUSG00000024397	813.733	-12.3018	1.47085	-8.36373	6.08e-17	3.51e-15
ENSMUSG00000024610	4649.41	-6.6904	0.330723	-20.2296	5.37e-91	4.19e-88
ENSMUSG00000024672	1249.01	-8.2228	1.32418	-6.20974	5.31e-10	1.03e-08
ENSMUSG00000024675	271.945	-10.7217	1.48133	-7.23792	4.56e-13	1.73e-11
ENSMUSG00000024679	651.781	-6.81477	1.55635	-4.37868	1.19e-05	0.00010291
ENSMUSG00000024696	309.244	-5.32168	0.54726	-9.72423	2.38e-22	1.95e-20
ENSMUSG00000024885	531.33	-1.09557	0.416395	-2.63108	0.00851132	0.0312415
ENSMUSG00000025044	1465.19	-7.60947	1.61063	-4.72454	2.31e-06	2.2e-05
ENSMUSG00000025058	65.0566	-8.65966	1.61121	-5.37464	7.67e-08	1.01e-06
ENSMUSG00000025877	222.005	-5.35026	1.41701	-3.77575	0.000159526	0.0010545
ENSMUSG00000025888	73.0563	-8.82515	1.61718	-5.45712	4.84e-08	6.74e-07
ENSMUSG00000026358	233.703	-6.27422	0.726595	-8.63511	5.87e-18	3.52e-16
ENSMUSG00000026395	207.964	-6.91219	0.911158	-7.58616	3.3e-14	1.51e-12
ENSMUSG00000026536	153.39	-9.8961	1.50538	-6.57381	4.9e-11	1.18e-09
ENSMUSG00000026656	182.995	-7.72433	1.20284	-6.42173	1.35e-10	2.96e-09
ENSMUSG00000026786	71.7846	-4.4994	0.822117	-5.47295	4.43e-08	6.22e-07
ENSMUSG00000026981	543.778	-11.7204	1.49879	-7.81992	5.29e-15	2.66e-13
ENSMUSG00000028238	118.728	-8.07602	1.58042	-5.11003	3.22e-07	3.67e-06
ENSMUSG00000028494	2963.63	-4.69261	0.284492	-16.4947	4e-61	1.25e-58
ENSMUSG00000028581	962.828	-5.52845	1.45231	-3.80667	0.000140848	0.000951184
ENSMUSG00000029204	81.7112	-8.98586	1.67392	-5.36815	7.95e-08	1.03e-06
ENSMUSG00000029373	4617.92	-7.46909	0.602903	-12.3885	3.01e-35	4.28e-33
ENSMUSG00000029771	480.396	-5.59101	1.70148	-3.28597	0.0010163	0.00530244
ENSMUSG00000029919	236.3	-5.38328	0.607732	-8.85799	8.15e-19	5.3e-17
ENSMUSG00000030059	9996.11	-1.03734	0.153924	-6.73931	1.59e-11	4.07e-10
ENSMUSG00000030144	369.888	-6.46033	1.29081	-5.00488	5.59e-07	6.23e-06
ENSMUSG00000030579	1737.78	-7.10456	1.30492	-5.44444	5.2e-08	7.05e-07
ENSMUSG00000030707	494.169	-6.65865	0.558962	-11.9125	1.02e-32	1.22e-30
ENSMUSG00000030745	118.533	-9.5212	1.5943	-5.97202	2.34e-09	4.2e-08
ENSMUSG00000030786	82.2237	-5.49861	0.957275	-5.74402	9.25e-09	1.47e-07
ENSMUSG00000030844	264.433	-4.31511	0.470972	-9.16213	5.09e-20	3.78e-18
ENSMUSG00000031264	62.5516	-8.60297	1.62387	-5.29781	1.17e-07	1.45e-06
ENSMUSG00000031662	152.18	-1.55277	0.531465	-2.92169	0.00348141	0.0153853
ENSMUSG00000032725	41.976	-8.02596	1.63389	-4.91218	9.01e-07	9.49e-06
ENSMUSG00000033220	412.193	-9.87834	1.4493	-6.81593	9.37e-12	2.52e-10
ENSMUSG00000033777	228.737	-9.02675	1.48353	-6.08464	1.17e-09	2.19e-08
ENSMUSG00000033825	222.071	-10.429	1.52281	-6.84851	7.46e-12	2.13e-10
ENSMUSG00000034116	218.191	-10.4048	1.52624	-6.81723	9.28e-12	2.52e-10
ENSMUSG00000034652	256.714	-3.51757	0.775982	-4.53306	5.81e-06	5.27e-05
ENSMUSG00000035352	1434.41	-5.59984	0.308308	-18.1631	1.01e-73	5.26e-71
ENSMUSG00000036192	336.456	-3.11053	0.547092	-5.68556	1.3e-08	1.92e-07
ENSMUSG00000036594	1353.78	-6.92502	1.09632	-6.3166	2.67e-10	5.49e-09
ENSMUSG00000036887	3385.91	-6.8775	2.03264	-3.38354	0.000715586	0.00394457
ENSMUSG00000036896	3765.7	-8.0297	1.1666	-6.88296	5.86e-12	1.76e-10
ENSMUSG00000036905	5802.42	-4.22281	0.25308	-16.6857	1.67e-62	6.5e-60
ENSMUSG00000036908	792.285	-3.10905	0.284879	-10.9136	9.92e-28	9.68e-26
ENSMUSG00000038147	439.068	-11.4129	1.52548	-7.4815	7.35e-14	3.18e-12
ENSMUSG00000038179	266.505	-10.692	1.4946	-7.15377	8.44e-13	2.99e-11
ENSMUSG00000038594	1423.25	-1.32598	0.321651	-4.12241	3.75e-05	0.000283923
ENSMUSG00000038642	4115.31	-7.29011	0.352523	-20.6798	5.26e-95	8.21e-92
ENSMUSG00000040345	87.9128	-7.64862	1.52902	-5.00229	5.67e-07	6.27e-06
ENSMUSG00000040658	1343.86	-1.13226	0.259532	-4.36268	1.28e-05	0.000110125
ENSMUSG00000040747	1328.27	-5.69324	2.0071	-2.83655	0.00456044	0.019385
ENSMUSG00000041515	623.493	-3.68079	0.442125	-8.32523	8.42e-17	4.69e-15
ENSMUSG00000041975	698.897	-1.7201	0.42598	-4.03799	5.39e-05	0.000392995
ENSMUSG00000042286	243.576	-6.55179	0.737861	-8.87944	6.72e-19	4.56e-17
ENSMUSG00000042834	2474.59	-1.24818	0.359626	-3.47076	0.000518985	0.00300973
ENSMUSG00000044811	442.173	-11.423	1.50267	-7.60177	2.92e-14	1.38e-12
ENSMUSG00000046805	729.958	-4.39742	0.357286	-12.3079	8.22e-35	1.07e-32
ENSMUSG00000048163	88.9908	-9.10988	1.56546	-5.8193	5.91e-09	9.81e-08
ENSMUSG00000049130	1114.98	-8.43011	1.2472	-6.75921	1.39e-11	3.67e-10
ENSMUSG00000049233	414.728	-1.1094	0.283845	-3.90849	9.29e-05	0.000643945
ENSMUSG00000049723	258.813	-10.6514	1.54816	-6.88003	5.98e-12	1.76e-10
ENSMUSG00000051172	127.158	-2.00179	0.594973	-3.3645	0.000766813	0.00415842
ENSMUSG00000051439	837.369	-4.15608	0.302822	-13.7245	7.24e-43	1.26e-40
ENSMUSG00000052305	1039.57	-7.62483	0.496033	-15.3716	2.54e-53	6.6e-51
ENSMUSG00000052336	151.083	-8.4264	1.47751	-5.70312	1.18e-08	1.8e-07
ENSMUSG00000053063	257.904	-10.6438	1.48641	-7.16072	8.03e-13	2.91e-11
ENSMUSG00000053158	129.137	-2.05245	0.499609	-4.10812	3.99e-05	0.000297735
ENSMUSG00000055541	187.097	-4.63761	0.790654	-5.86553	4.48e-09	7.67e-08
ENSMUSG00000056069	229.303	-2.52784	0.598188	-4.22582	2.38e-05	0.000191436
ENSMUSG00000056888	79.7913	-8.95384	1.56847	-5.70864	1.14e-08	1.76e-07
ENSMUSG00000058715	2539.94	-5.917	1.38398	-4.27534	1.91e-05	0.000155873
ENSMUSG00000059498	585.233	-10.3834	1.47273	-7.05044	1.78e-12	5.92e-11
ENSMUSG00000060063	84.4241	-4.56324	0.765915	-5.95789	2.56e-09	4.48e-08
ENSMUSG00000060176	787.053	-1.61181	0.302892	-5.32142	1.03e-07	1.32e-06
ENSMUSG00000060586	1536.11	-1.86941	0.351367	-5.3204	1.04e-07	1.32e-06
ENSMUSG00000062515	137.703	-6.72606	1.00241	-6.70987	1.95e-11	4.9e-10
ENSMUSG00000062593	501.43	-5.80052	1.69343	-3.42531	0.000614094	0.00347096
ENSMUSG00000067872	258.765	-1.21339	0.467369	-2.59621	0.00942589	0.0338032
ENSMUSG00000069516	12495.4	-6.88759	1.15586	-5.95887	2.54e-09	4.48e-08
ENSMUSG00000070823	220.484	-1.34767	0.382901	-3.51964	0.000432131	0.00254387
ENSMUSG00000071715	154.169	-9.90113	1.53831	-6.43635	1.22e-10	2.73e-09
ENSMUSG00000073421	2345.96	-3.27313	0.315989	-10.3584	3.83e-25	3.32e-23
ENSMUSG00000073489	251.596	-10.6106	1.53524	-6.91138	4.8e-12	1.5e-10
ENSMUSG00000073490	199.878	-10.278	1.50656	-6.82218	8.97e-12	2.5e-10
ENSMUSG00000074622	625.386	-5.25656	0.469485	-11.1964	4.24e-29	4.41e-27
ENSMUSG00000079419	310.683	-10.9133	1.47514	-7.39817	1.38e-13	5.67e-12
ENSMUSG00000079457	113.87	-1.73389	0.658258	-2.63406	0.00843715	0.0310423
ENSMUSG00000081306	1143.24	-1.66662	0.401439	-4.1516	3.3e-05	0.000253716
ENSMUSG00000083084	34.7326	-2.609	0.992639	-2.62835	0.00857997	0.0313741
ENSMUSG00000083240	900.003	-1.44745	0.285976	-5.06142	4.16e-07	4.67e-06
ENSMUSG00000085218	125.019	-1.16358	0.471073	-2.47007	0.0135086	0.0455148
ENSMUSG00000085295	154.363	-6.86214	1.00209	-6.84786	7.5e-12	2.13e-10
ENSMUSG00000086691	603.608	-1.22942	0.261952	-4.69329	2.69e-06	2.54e-05
ENSMUSG00000087043	322.082	-1.01952	0.319303	-3.19296	0.00140823	0.00706379
ENSMUSG00000087107	213.294	-7.91553	1.10493	-7.16383	7.85e-13	2.91e-11
ENSMUSG00000087635	218.015	-1.43402	0.369313	-3.88295	0.000103198	0.000712341
ENSMUSG00000089672	295.271	-10.8407	1.49641	-7.24443	4.34e-13	1.69e-11
ENSMUSG00000089929	83.5091	-9.01782	1.55497	-5.79934	6.66e-09	1.08e-07
ENSMUSG00000089976	43.1406	-2.4729	0.903478	-2.73709	0.00619862	0.0241746
ENSMUSG00000094320	695.108	-1.03009	0.268652	-3.8343	0.000125922	0.000854078
ENSMUSG00000097503	478.422	-1.14473	0.296154	-3.86531	0.000110946	0.000759105
ENSMUSG00000098112	97.8552	-9.24781	1.57395	-5.87554	4.21e-09	7.31e-08
ENSMUSG00000099974	126.216	-7.17788	1.12039	-6.40659	1.49e-10	3.22e-09
ENSMUSG00000100094	207.299	-1.46434	0.388362	-3.77054	0.000162892	0.0010677
ENSMUSG00000102037	60.7875	-8.56056	1.58163	-5.4125	6.21e-08	8.35e-07
ENSMUSG00000102386	249.244	-3.02495	0.612405	-4.93945	7.83e-07	8.38e-06
ENSMUSG00000103558	35.0756	-3.23813	1.18727	-2.72737	0.0063842	0.024713
ENSMUSG00000104104	26.4961	-4.33724	1.39293	-3.11376	0.0018472	0.00897703
ENSMUSG00000107449	47.1397	-2.26899	0.863376	-2.62805	0.00858767	0.0313741
ENSMUSG00000108249	46.834	-2.12636	0.818443	-2.59806	0.00937532	0.033706

## Sheet: B_sfHC_co_IP_vs_SC_co_IP
ensembl_gene_id	baseMean	log2FoldChange	lfcSE	stat	pvalue	padj
ENSMUSG00000000088	2856.63	0.501219	0.31901	1.57117	0.116143	0.192617
ENSMUSG00000000142	224.935	1.27129	0.484631	2.62322	0.00871028	0.0247735
ENSMUSG00000000167	518.368	-1.1496	0.475916	-2.41556	0.0157112	0.0390308
ENSMUSG00000000282	354.433	0.0318418	0.435653	0.0730898	0.941735	0.958827
ENSMUSG00000000308	669.743	-1.47895	0.415882	-3.55619	0.000376273	0.00189656
ENSMUSG00000000359	165.62	-0.749509	0.446762	-1.67765	0.0934157	0.162493
ENSMUSG00000000374	798.019	1.30294	0.388275	3.35571	0.000791625	0.00345991
ENSMUSG00000000486	71.3214	0.255982	0.762085	0.335897	0.736948	0.79774
ENSMUSG00000000532	194.177	0.462517	0.654815	0.706333	0.479981	0.575534
ENSMUSG00000000552	1551.73	-2.00092	0.400599	-4.99482	5.889e-07	8.91202e-06
ENSMUSG00000000579	123.648	-0.00317868	0.502585	-0.00632467	0.994954	0.995776
ENSMUSG00000000581	1733.53	-0.623412	0.573654	-1.08674	0.277152	0.372683
ENSMUSG00000000605	3009.21	-0.958722	0.289449	-3.31224	0.000925534	0.00396876
ENSMUSG00000000628	2439.73	2.63074	0.464689	5.6613	1.50235e-08	4.22987e-07
ENSMUSG00000000682	160.92	5.10802	2.01479	2.53526	0.0112364	0.0301145
ENSMUSG00000000804	541.121	0.370538	0.448595	0.825996	0.408806	0.505564
ENSMUSG00000000869	76.5629	-1.50614	0.623584	-2.4153	0.0157221	0.0390313
ENSMUSG00000000876	395.437	-1.09372	0.459149	-2.38205	0.0172165	0.0419385
ENSMUSG00000000976	589.066	-0.178703	0.365049	-0.489532	0.624465	0.702838
ENSMUSG00000001014	29.8012	0.384197	1.03714	0.370438	0.711056	0.776475
ENSMUSG00000001016	2253.53	-0.38833	0.405855	-0.956819	0.338659	0.437569
ENSMUSG00000001020	84.0271	3.61972	0.730392	4.95587	7.20087e-07	1.05458e-05
ENSMUSG00000001025	8985.44	4.19182	0.340708	12.3033	8.6996e-35	1.57985e-31
ENSMUSG00000001105	1846.62	0.244754	0.280843	0.871496	0.383484	0.481942
ENSMUSG00000001134	451.6	1.22592	0.464742	2.63785	0.00834344	0.0239742
ENSMUSG00000001158	2638.05	0.892938	0.303913	2.93814	0.00330192	0.011229
ENSMUSG00000001175	39310.4	-0.165307	0.302426	-0.546603	0.584651	0.667298
ENSMUSG00000001227	520.697	-1.81272	0.421731	-4.29829	1.72124e-05	0.000156289
ENSMUSG00000001285	834.275	-0.0539967	0.332105	-0.162589	0.870842	0.903743
ENSMUSG00000001289	3062.46	0.825087	0.335606	2.4585	0.0139517	0.0357353
ENSMUSG00000001348	64.4498	9.31229	3.39509	2.74287	0.00609052	0.0184186
ENSMUSG00000001383	2963.73	0.802373	0.285307	2.81232	0.00491857	0.0155206
ENSMUSG00000001504	3887.4	-1.15778	0.40496	-2.85899	0.00424997	0.0137821
ENSMUSG00000001520	53.5355	0.360753	0.853837	0.422508	0.672654	0.744387
ENSMUSG00000001521	1654.74	1.25087	0.382064	3.27398	0.00106043	0.00445051
ENSMUSG00000001657	4.25065	3.80997	2.55568	1.49079	0.136017	0.216673
ENSMUSG00000001666	497.011	0.667143	0.413594	1.61304	0.106736	0.180478
ENSMUSG00000001674	943.233	0.810061	0.398092	2.03486	0.0418651	0.0862962
ENSMUSG00000001918	906.193	-1.8812	0.459911	-4.09035	4.30721e-05	0.00032456
ENSMUSG00000001948	801.447	-0.648537	0.370576	-1.75008	0.0801051	0.14344
ENSMUSG00000002028	1291.81	0.219671	0.424177	0.517876	0.604545	0.684447
ENSMUSG00000002064	1953.04	-0.225567	0.331876	-0.679671	0.496713	0.590527
ENSMUSG00000002083	123.033	0.0311195	0.624296	0.0498474	0.960244	0.971749
ENSMUSG00000002228	91.2675	0.520432	0.620845	0.838264	0.401882	0.499478
ENSMUSG00000002250	142.137	1.58842	0.621789	2.5546	0.0106309	0.0288144
ENSMUSG00000002265	617.5	-1.04953	0.361644	-2.90211	0.00370658	0.0123507
ENSMUSG00000002342	1249.85	-0.58324	0.498911	-1.16903	0.242393	0.336341
ENSMUSG00000002379	4380.72	0.963661	0.326956	2.94737	0.00320488	0.0109813
ENSMUSG00000002486	349.279	-0.777734	0.563154	-1.38103	0.167269	0.254939
ENSMUSG00000002489	371.408	2.15785	0.528019	4.08669	4.37562e-05	0.000329032
ENSMUSG00000002580	1496.47	1.24746	0.322952	3.86267	0.000112155	0.000715898
ENSMUSG00000002625	1357	-0.543044	0.421784	-1.28749	0.197922	0.290563
ENSMUSG00000002661	844.13	0.190639	0.302559	0.630091	0.528635	0.617563
ENSMUSG00000002748	1025.03	0.387905	0.441702	0.878206	0.379832	0.477849
ENSMUSG00000003031	357.633	0.881834	0.498711	1.76823	0.0770232	0.139527
ENSMUSG00000003032	312.092	0.936671	0.422958	2.21457	0.0267895	0.0596198
ENSMUSG00000003119	490.595	0.423023	0.524228	0.806944	0.419699	0.517178
ENSMUSG00000003206	22.9186	1.85024	1.20365	1.53719	0.124247	0.202452
ENSMUSG00000003271	42.201	3.99672	0.938252	4.25975	2.04653e-05	0.000179976
ENSMUSG00000003282	36.7795	4.43609	1.09854	4.03818	5.38664e-05	0.000390504
ENSMUSG00000003354	3420.74	-1.625	0.395838	-4.10522	4.03926e-05	0.000308206
ENSMUSG00000003355	829.152	-0.741074	0.324313	-2.28506	0.0223095	0.0518745
ENSMUSG00000003360	285.697	1.39815	0.521475	2.68114	0.00733714	0.0214907
ENSMUSG00000003402	1896.64	-0.55622	0.29614	-1.87824	0.060349	0.115059
ENSMUSG00000003436	74.0523	0.600614	1.34211	0.447516	0.654503	0.727626
ENSMUSG00000003545	377.442	0.757832	0.388131	1.95252	0.0508767	0.10092
ENSMUSG00000003657	8774.86	-1.41727	0.540166	-2.62378	0.00869608	0.0247525
ENSMUSG00000003812	1030.8	-0.042737	0.334682	-0.127694	0.898391	0.925671
ENSMUSG00000003847	1139.27	0.595948	0.384143	1.55137	0.120813	0.198189
ENSMUSG00000003863	127.434	-2.228	1.01509	-2.19488	0.0281719	0.0621253
ENSMUSG00000003872	81.2627	-1.32392	0.654883	-2.02161	0.0432171	0.0883808
ENSMUSG00000003934	17.8434	-0.152126	1.31007	-0.116121	0.907557	0.933517
ENSMUSG00000003970	8248.51	1.80282	0.364722	4.943	7.69277e-07	1.11315e-05
ENSMUSG00000004018	542.834	-1.12895	0.360591	-3.13083	0.00174315	0.00668545
ENSMUSG00000004035	2419.57	-1.47985	0.407603	-3.63061	0.000282749	0.00149483
ENSMUSG00000004231	183.096	-0.520754	0.522475	-0.996708	0.318906	0.418147
ENSMUSG00000004263	224.972	0.43628	0.554062	0.787421	0.431036	0.528357
ENSMUSG00000004267	2036.63	-1.80258	0.436182	-4.13264	3.5862e-05	0.000279508
ENSMUSG00000004317	322.115	1.05311	0.382336	2.75441	0.00587987	0.0179008
ENSMUSG00000004319	3028.19	-0.785743	0.362541	-2.16732	0.0302101	0.0660982
ENSMUSG00000004394	3704.19	-1.08928	0.377831	-2.88299	0.00393919	0.0129947
ENSMUSG00000004473	111.323	1.02139	0.827387	1.23448	0.217025	0.310573
ENSMUSG00000004561	219.167	-0.474526	0.641583	-0.739617	0.459532	0.55597
ENSMUSG00000004610	482.518	1.01895	0.377525	2.69902	0.00695442	0.0205317
ENSMUSG00000004730	147.625	5.77572	0.972228	5.94071	2.83794e-09	1.05178e-07
ENSMUSG00000004748	122.259	-1.55336	0.612254	-2.53712	0.0111769	0.0300255
ENSMUSG00000004842	3.42132	3.59093	3.30058	1.08797	0.27661	0.372231
ENSMUSG00000004865	1116.45	-0.413562	0.366786	-1.12753	0.259519	0.355018
ENSMUSG00000004896	189.818	-1.45633	0.507516	-2.86952	0.00411092	0.013427
ENSMUSG00000004933	298.62	-2.68761	0.492481	-5.45729	4.83452e-08	1.14764e-06
ENSMUSG00000004961	60.1592	-1.31608	0.826876	-1.59163	0.111468	0.186567
ENSMUSG00000004980	10542.4	-0.159113	0.397052	-0.400737	0.688614	0.757892
ENSMUSG00000005045	349.753	-0.711894	0.403938	-1.76238	0.0780044	0.140601
ENSMUSG00000005237	147.771	-1.1561	0.825627	-1.40027	0.161434	0.247814
ENSMUSG00000005371	877.366	0.397907	0.452387	0.879574	0.37909	0.477412
ENSMUSG00000005442	1480.29	0.167676	0.391313	0.428496	0.66829	0.74046
ENSMUSG00000005447	3560.41	0.124886	0.315034	0.396422	0.691794	0.76024
ENSMUSG00000005533	2158.34	0.345024	0.441855	0.780855	0.434888	0.531339
ENSMUSG00000005534	749.795	-0.0391574	0.476539	-0.0821703	0.934511	0.954752
ENSMUSG00000005547	297.147	-2.80657	0.469291	-5.98046	2.22509e-09	8.59737e-08
ENSMUSG00000005580	398.798	-0.985783	0.367492	-2.68246	0.00730821	0.0214406
ENSMUSG00000005687	3713.9	0.250467	0.411199	0.609114	0.542449	0.630254
ENSMUSG00000005698	2146.78	0.350851	0.38027	0.922635	0.356198	0.454731
ENSMUSG00000005699	592.892	-0.223455	0.472204	-0.473216	0.636059	0.711755
ENSMUSG00000005716	1597.57	-1.0416	0.542819	-1.91888	0.0549994	0.107294
ENSMUSG00000005718	72.3322	0.555095	0.66708	0.832126	0.405338	0.502453
ENSMUSG00000005779	4914.89	0.699604	0.278888	2.50854	0.012123	0.0320456
ENSMUSG00000005968	1508.23	-2.61427	0.430566	-6.0717	1.26562e-09	5.47231e-08
ENSMUSG00000005973	8668.87	-0.979749	0.415642	-2.35719	0.0184138	0.0443199
ENSMUSG00000005980	130.939	1.31559	0.597764	2.20086	0.0277461	0.0614474
ENSMUSG00000005983	207.157	-0.778572	0.47273	-1.64697	0.0995639	0.170393
ENSMUSG00000006005	2552.62	-0.357482	0.48838	-0.731976	0.464183	0.560663
ENSMUSG00000006273	4371.28	-0.94345	0.475711	-1.98324	0.0473402	0.0953631
ENSMUSG00000006281	175.671	0.603725	0.496642	1.21561	0.224132	0.31787
ENSMUSG00000006288	1061.81	-0.737984	0.477463	-1.54563	0.122193	0.199803
ENSMUSG00000006307	354.729	0.0515353	0.531862	0.096896	0.922809	0.946524
ENSMUSG00000006333	8372.9	1.57521	0.293605	5.36507	8.09191e-08	1.66044e-06
ENSMUSG00000006360	557.603	3.5603	0.375388	9.48433	2.43936e-21	8.85977e-19
ENSMUSG00000006395	523.293	0.366511	0.5417	0.676594	0.498664	0.591491
ENSMUSG00000006412	2774.1	1.24262	0.297697	4.17409	2.99178e-05	0.00024147
ENSMUSG00000006462	25.6344	2.63566	2.03636	1.2943	0.195562	0.287796
ENSMUSG00000006576	197.847	0.637223	0.473501	1.34577	0.178377	0.267823
ENSMUSG00000006586	263.178	-0.89868	0.442681	-2.03009	0.0423479	0.0869952
ENSMUSG00000006651	4543.61	-1.79971	0.439553	-4.09441	4.23253e-05	0.000320262
ENSMUSG00000006675	415.047	-1.47452	0.48304	-3.05259	0.00226872	0.00831443
ENSMUSG00000006711	156.575	-2.80021	0.485657	-5.76582	8.126e-09	2.58891e-07
ENSMUSG00000006717	1576.15	-0.114103	0.355263	-0.321181	0.748074	0.806019
ENSMUSG00000006777	437.223	-2.88759	0.564399	-5.11621	3.11732e-07	5.4701e-06
ENSMUSG00000006784	482.753	-1.30008	0.474279	-2.74117	0.00612213	0.0184834
ENSMUSG00000006850	493.957	-0.53775	0.357689	-1.5034	0.132736	0.212658
ENSMUSG00000007038	1003.14	-0.836927	0.336511	-2.48707	0.0128799	0.0336304
ENSMUSG00000007476	506.112	0.993109	0.451907	2.1976	0.0279777	0.0618096
ENSMUSG00000007610	289.993	-0.429847	0.50001	-0.859677	0.389967	0.488425
ENSMUSG00000007646	130.001	-1.92092	0.578748	-3.3191	0.000903097	0.00388171
ENSMUSG00000007827	670.258	-1.22023	0.369451	-3.30282	0.00095717	0.00408033
ENSMUSG00000007836	1445.74	0.342515	0.311251	1.10045	0.271137	0.367041
ENSMUSG00000007850	4657.01	-0.748188	0.495934	-1.50864	0.13139	0.211061
ENSMUSG00000007867	1780.68	0.244198	0.338187	0.72208	0.470245	0.566854
ENSMUSG00000007880	1963.94	-0.0341726	0.296931	-0.115086	0.908377	0.934053
ENSMUSG00000008153	595.439	-2.38842	0.495084	-4.82428	1.40509e-06	1.86934e-05
ENSMUSG00000008200	579.724	-0.455654	0.452558	-1.00684	0.314011	0.412174
ENSMUSG00000008318	1850.09	-1.49315	0.419461	-3.55968	0.000371309	0.00187784
ENSMUSG00000008496	36.8	1.84089	0.964546	1.90855	0.0563197	0.10927
ENSMUSG00000008575	3446.04	1.43108	0.420751	3.40125	0.000670796	0.00299304
ENSMUSG00000008683	2515.15	1.88535	0.382193	4.93297	8.09866e-07	1.16724e-05
ENSMUSG00000008763	1573.09	-0.684247	0.356043	-1.92181	0.05463	0.106733
ENSMUSG00000008822	464.88	-0.432423	0.39486	-1.09513	0.27346	0.369222
ENSMUSG00000009070	261.068	-1.47674	0.710338	-2.07892	0.0376248	0.0788991
ENSMUSG00000009075	936.611	-1.72846	0.412311	-4.19213	2.76348e-05	0.000227081
ENSMUSG00000009076	410.613	0.797795	0.414996	1.92242	0.0545533	0.10664
ENSMUSG00000009145	17.4089	0.781239	1.21557	0.642696	0.520421	0.609781
ENSMUSG00000009535	871.957	-0.253432	0.450473	-0.56259	0.573714	0.658782
ENSMUSG00000009569	247.974	0.897609	0.514247	1.74548	0.080901	0.144389
ENSMUSG00000009640	695.888	-0.275691	0.403586	-0.683104	0.494541	0.588523
ENSMUSG00000009681	920.366	0.618583	0.440142	1.40542	0.159897	0.246079
ENSMUSG00000009734	176.981	-0.373612	0.614664	-0.607831	0.5433	0.630637
ENSMUSG00000009876	1166.74	2.75109	0.416047	6.61245	3.78005e-11	2.9211e-09
ENSMUSG00000009927	7575.41	1.86413	0.394493	4.72538	2.29685e-06	2.88074e-05
ENSMUSG00000010044	594.222	-1.9217	0.375678	-5.11529	3.13266e-07	5.4701e-06
ENSMUSG00000010057	564.444	-1.2664	0.527183	-2.4022	0.0162969	0.0401562
ENSMUSG00000010066	128.007	-1.13128	0.568998	-1.9882	0.0467901	0.094412
ENSMUSG00000010136	3091.76	-1.0115	0.456137	-2.21754	0.0265862	0.0593523
ENSMUSG00000010307	969.997	-0.637212	0.407142	-1.56508	0.117563	0.194617
ENSMUSG00000010362	757.799	-0.961	0.427655	-2.24714	0.0246311	0.0561935
ENSMUSG00000010376	5316.53	1.31395	0.360417	3.64564	0.000266732	0.00142466
ENSMUSG00000010406	3661.41	1.95428	0.356148	5.48726	4.08207e-08	1.00176e-06
ENSMUSG00000010476	247.875	1.60408	0.564305	2.84257	0.00447515	0.0143584
ENSMUSG00000010492	56.4266	0.299763	0.869881	0.344602	0.730394	0.791641
ENSMUSG00000010538	64.0177	0.413807	0.808269	0.511966	0.608675	0.688405
ENSMUSG00000010607	946.425	0.716189	0.308164	2.32405	0.0201229	0.0477376
ENSMUSG00000010608	4146.65	0.883219	0.37933	2.32837	0.0198926	0.0473043
ENSMUSG00000010760	71.6177	2.70048	0.79215	3.40905	0.000651907	0.00293855
ENSMUSG00000011154	2665.78	-1.17729	0.430142	-2.73698	0.00620065	0.0186585
ENSMUSG00000011257	360.438	1.1935	0.397899	2.99951	0.00270415	0.00957258
ENSMUSG00000011263	27.753	0.148351	0.994777	0.14913	0.881451	0.912157
ENSMUSG00000011305	185.016	-0.603669	0.74557	-0.809674	0.418128	0.515492
ENSMUSG00000011658	454.812	-1.09135	0.376427	-2.89924	0.0037407	0.0124416
ENSMUSG00000012126	987.985	-1.47387	0.483808	-3.0464	0.00231598	0.00846242
ENSMUSG00000012187	501.872	-1.12491	0.593451	-1.89554	0.0580205	0.111616
ENSMUSG00000012296	3791.4	-1.86869	0.341126	-5.47801	4.30134e-08	1.03694e-06
ENSMUSG00000012483	437.206	0.76685	0.570436	1.34432	0.178844	0.268081
ENSMUSG00000012705	2.85284	2.1548	3.55199	0.606647	0.544085	0.630945
ENSMUSG00000012819	522.246	-1.79685	0.412665	-4.35426	1.3352e-05	0.000125309
ENSMUSG00000013033	537.316	-0.353921	0.397668	-0.889991	0.37347	0.47234
ENSMUSG00000013076	3178.06	2.6148	0.396365	6.59694	4.19733e-11	3.11116e-09
ENSMUSG00000013155	217.122	-1.19928	0.422889	-2.83593	0.0045692	0.0146214
ENSMUSG00000013846	426.538	-0.892637	0.577963	-1.54445	0.122478	0.200019
ENSMUSG00000013858	745.695	-0.351071	0.467951	-0.750231	0.453116	0.549671
ENSMUSG00000014075	1278.6	-0.0990094	0.447781	-0.221111	0.825006	0.868528
ENSMUSG00000014232	542.887	-0.691765	0.341634	-2.02487	0.0428804	0.0879663
ENSMUSG00000014294	6266.15	1.10391	0.354304	3.11572	0.00183495	0.00697856
ENSMUSG00000014301	1021.31	0.921791	0.366701	2.51374	0.0119458	0.0316693
ENSMUSG00000014303	297.358	1.62301	0.512913	3.1643	0.00155458	0.00613722
ENSMUSG00000014503	86.5774	-2.55217	0.640772	-3.98296	6.80625e-05	0.000480006
ENSMUSG00000014504	2021.32	0.832834	0.306653	2.71588	0.00661	0.0196783
ENSMUSG00000014602	1547.71	-0.753973	0.372566	-2.02373	0.0429978	0.087982
ENSMUSG00000014633	327.552	0.737679	0.423608	1.74142	0.0816097	0.145368
ENSMUSG00000014773	1032.59	-1.96148	0.70862	-2.76802	0.00563973	0.0173003
ENSMUSG00000014778	111.519	2.36887	0.712162	3.32631	0.000880055	0.00380973
ENSMUSG00000014846	194.548	0.0209243	0.525731	0.0398005	0.968252	0.975775
ENSMUSG00000014856	2359	0.674963	0.323609	2.08573	0.0370027	0.0778946
ENSMUSG00000014907	235.674	0.880444	0.488376	1.8028	0.0714197	0.131273
ENSMUSG00000015013	2191.52	-0.0797364	0.325464	-0.244993	0.806462	0.85321
ENSMUSG00000015143	985.653	2.0685	0.436491	4.73894	2.14842e-06	2.72834e-05
ENSMUSG00000015189	691.491	-1.57232	0.483531	-3.25174	0.00114702	0.00474486
ENSMUSG00000015305	378.306	1.47218	0.531521	2.76976	0.00560984	0.0172523
ENSMUSG00000015312	3581.22	2.41641	0.349679	6.91036	4.83422e-12	5.48684e-10
ENSMUSG00000015337	465.396	-0.19494	0.521901	-0.373518	0.708763	0.774902
ENSMUSG00000015377	138.34	-0.85476	0.506522	-1.68751	0.0915055	0.15986
ENSMUSG00000015474	512.014	-1.16143	0.363763	-3.19282	0.00140893	0.0056544
ENSMUSG00000015501	1262.25	0.270152	0.3969	0.680655	0.49609	0.58998
ENSMUSG00000015542	459.247	-0.730698	0.349309	-2.09184	0.0364528	0.0769747
ENSMUSG00000015597	435.7	-0.329146	0.570585	-0.576856	0.564037	0.64986
ENSMUSG00000015652	111.407	-2.07755	0.68309	-3.0414	0.00235479	0.00857568
ENSMUSG00000015745	1106.1	-0.574456	0.345832	-1.66108	0.096697	0.166843
ENSMUSG00000015749	5693.28	-0.355672	0.326179	-1.09042	0.275528	0.371256
ENSMUSG00000015755	864.311	0.9036	0.359629	2.51259	0.011985	0.0317501
ENSMUSG00000015766	994.986	-0.976668	0.304462	-3.20785	0.00133729	0.00542736
ENSMUSG00000015812	13.4484	3.0435	2.29843	1.32416	0.185448	0.275705
ENSMUSG00000015943	1669.47	0.352549	0.359194	0.981502	0.326345	0.426044
ENSMUSG00000015947	167.298	10.6903	1.58697	6.73628	1.62497e-11	1.40521e-09
ENSMUSG00000015950	90.9604	-0.0793898	0.725155	-0.10948	0.912822	0.937604
ENSMUSG00000015968	495.937	-0.710103	0.350794	-2.02428	0.0429417	0.0879663
ENSMUSG00000015980	1003.69	-0.694091	0.507353	-1.36806	0.171292	0.259872
ENSMUSG00000016028	539.911	-0.30097	0.445584	-0.675451	0.499389	0.592159
ENSMUSG00000016181	149.665	1.57876	0.592243	2.66572	0.00768226	0.0222859
ENSMUSG00000016200	1006.23	-1.76743	0.363581	-4.86118	1.16691e-06	1.58735e-05
ENSMUSG00000016409	742.229	0.462827	0.386796	1.19657	0.231475	0.32466
ENSMUSG00000016427	4503.8	1.58131	0.335889	4.70784	2.50354e-06	3.11399e-05
ENSMUSG00000016493	16.5147	-1.67547	1.32914	-1.26057	0.207466	0.300461
ENSMUSG00000016495	474.66	0.793101	0.442698	1.79152	0.0732107	0.133895
ENSMUSG00000016559	29982.8	-0.294813	0.449927	-0.655246	0.512309	0.602847
ENSMUSG00000016637	1470.5	-0.804957	0.312894	-2.57262	0.0100931	0.0276667
ENSMUSG00000016763	8.25754	-1.30101	2.24098	-0.580555	0.561541	0.647671
ENSMUSG00000016833	891.217	1.47844	0.345495	4.2792	1.87563e-05	0.000167378
ENSMUSG00000016984	415.057	0.165644	0.432125	0.383324	0.701479	0.768074
ENSMUSG00000017291	1460.04	0.337645	0.36993	0.912728	0.361385	0.459416
ENSMUSG00000017376	447.173	0.294522	0.384461	0.766064	0.443638	0.540521
ENSMUSG00000017404	3664.43	1.9573	0.340908	5.74143	9.38782e-09	2.91424e-07
ENSMUSG00000017677	1610.17	-0.527943	0.558037	-0.946072	0.344112	0.443105
ENSMUSG00000017723	8206.29	1.817	0.280467	6.47849	9.26461e-11	5.80156e-09
ENSMUSG00000017740	86.2704	-1.49875	0.699254	-2.14335	0.0320849	0.0693645
ENSMUSG00000017760	2376.12	-0.863556	0.304915	-2.83212	0.004624	0.0147708
ENSMUSG00000017778	3106.49	0.991209	0.384975	2.57474	0.0100316	0.0275813
ENSMUSG00000017929	3827.46	-1.59734	0.367286	-4.34903	1.3674e-05	0.000127671
ENSMUSG00000017943	307.187	-1.26903	0.634737	-1.9993	0.0455764	0.0922855
ENSMUSG00000017969	1733.15	-0.790077	0.50681	-1.55892	0.119015	0.196126
ENSMUSG00000018076	1151.5	0.454043	0.484826	0.936509	0.349011	0.447602
ENSMUSG00000018102	1004.05	-0.0834953	0.327252	-0.255141	0.798614	0.847128
ENSMUSG00000018126	142.044	-1.34006	0.642667	-2.08516	0.0370551	0.0779295
ENSMUSG00000018322	2293.91	-1.4559	0.309906	-4.69788	2.62871e-06	3.23643e-05
ENSMUSG00000018334	485.463	0.539842	0.37275	1.44827	0.147542	0.231679
ENSMUSG00000018372	194.36	-0.860094	0.622912	-1.38076	0.167352	0.254959
ENSMUSG00000018395	3223.95	-0.639311	0.362677	-1.76276	0.0779412	0.140601
ENSMUSG00000018411	1410.69	-1.19146	0.327731	-3.63549	0.000277455	0.00147149
ENSMUSG00000018427	331.233	-0.273301	0.369482	-0.739688	0.459489	0.55597
ENSMUSG00000018449	648.43	0.117816	0.384962	0.306046	0.75957	0.814514
ENSMUSG00000018474	437.898	1.28087	0.484741	2.64239	0.00823226	0.023711
ENSMUSG00000018476	1618.96	0.666441	0.390625	1.70609	0.0879915	0.154711
ENSMUSG00000018501	3033.39	-0.208088	0.321715	-0.646809	0.517755	0.607589
ENSMUSG00000018509	564.797	-0.225919	0.453345	-0.498338	0.618246	0.698218
ENSMUSG00000018537	165.261	-0.741725	0.550147	-1.34823	0.177584	0.266964
ENSMUSG00000018547	213.284	0.579553	0.493949	1.17331	0.240673	0.334785
ENSMUSG00000018648	2323.18	-1.18709	0.40093	-2.96085	0.00306791	0.0106222
ENSMUSG00000018666	1527.66	0.810118	0.308349	2.62727	0.00860719	0.0245572
ENSMUSG00000018707	2595.22	0.0553627	0.381279	0.145203	0.884551	0.914673
ENSMUSG00000018750	902.48	0.555243	0.434179	1.27883	0.200956	0.293746
ENSMUSG00000018800	2000.44	-1.70249	0.364649	-4.66885	3.02887e-06	3.6187e-05
ENSMUSG00000018865	1028.62	-1.26973	0.475722	-2.66905	0.00760668	0.022102
ENSMUSG00000018923	492.558	1.61758	0.541656	2.98636	0.00282317	0.00986885
ENSMUSG00000018927	381.675	11.8776	2.33685	5.08276	3.71994e-07	6.26913e-06
ENSMUSG00000018930	164.866	5.24652	1.90805	2.74968	0.0059654	0.0181452
ENSMUSG00000019088	196.909	2.30693	0.674725	3.41907	0.000628363	0.00285277
ENSMUSG00000019122	95.9583	4.5303	0.838629	5.40202	6.58929e-08	1.45929e-06
ENSMUSG00000019132	2235.67	-0.257734	0.382075	-0.674563	0.499953	0.592441
ENSMUSG00000019158	1602.61	1.59006	0.302334	5.2593	1.44608e-07	2.83902e-06
ENSMUSG00000019178	95.2929	-0.814594	1.21405	-0.670973	0.502238	0.594182
ENSMUSG00000019232	76.8181	-1.08681	0.612001	-1.77583	0.0757605	0.13765
ENSMUSG00000019235	308.489	-1.92937	0.436246	-4.42267	9.74891e-06	9.51829e-05
ENSMUSG00000019302	3693.46	-1.53134	0.397862	-3.84893	0.000118637	0.000754623
ENSMUSG00000019362	4154.17	1.57322	0.404165	3.89252	9.92097e-05	0.000649243
ENSMUSG00000019368	3.63393	1.17479	2.55863	0.459149	0.646127	0.720963
ENSMUSG00000019659	1572.3	0.963305	0.300577	3.20486	0.0013513	0.0054715
ENSMUSG00000019689	1124.04	0.69663	0.371795	1.87369	0.0609727	0.116005
ENSMUSG00000019737	5550.74	-1.59328	0.439789	-3.62283	0.000291401	0.00153833
ENSMUSG00000019738	1504.03	0.812262	0.46158	1.75974	0.0784517	0.141267
ENSMUSG00000019761	506.025	0.0206322	0.340792	0.0605418	0.951724	0.96618
ENSMUSG00000019774	246.099	0.362992	0.745951	0.486616	0.62653	0.704725
ENSMUSG00000019777	3698.31	-0.665673	0.415869	-1.60068	0.109448	0.183949
ENSMUSG00000019787	684.748	-0.74628	0.491892	-1.51716	0.129226	0.208692
ENSMUSG00000019789	399.746	2.08774	0.405913	5.14333	2.69907e-07	4.89906e-06
ENSMUSG00000019796	919.618	-1.95207	0.438602	-4.45067	8.56035e-06	8.6605e-05
ENSMUSG00000019820	1433.62	1.26934	0.440165	2.88378	0.00392937	0.0129741
ENSMUSG00000019822	494.631	-0.826952	0.576837	-1.4336	0.151687	0.236246
ENSMUSG00000019838	145.686	0.0250627	0.501445	0.0499809	0.960138	0.971749
ENSMUSG00000019841	733.989	-0.130447	0.397805	-0.327918	0.742974	0.802326
ENSMUSG00000019848	1164.89	-1.76438	0.510074	-3.45907	0.000542041	0.00253698
ENSMUSG00000019856	273.332	-1.29411	0.438149	-2.95359	0.00314103	0.010793
ENSMUSG00000019872	1643.89	-1.71731	0.365445	-4.69922	2.61158e-06	3.22628e-05
ENSMUSG00000019873	2525.63	-0.845861	0.300729	-2.8127	0.00491276	0.0155158
ENSMUSG00000019878	86.154	0.0197784	0.626678	0.0315606	0.974822	0.980492
ENSMUSG00000019880	491.252	-0.698427	0.403407	-1.73132	0.083395	0.147968
ENSMUSG00000019888	61.3373	-1.54814	1.27196	-1.21713	0.223554	0.317539
ENSMUSG00000019892	740.39	-0.841325	0.425701	-1.97633	0.0481178	0.0966079
ENSMUSG00000019897	1286.01	0.913253	0.375563	2.43169	0.0150284	0.0378786
ENSMUSG00000019907	714.834	0.885088	0.329881	2.68305	0.00729547	0.0214205
ENSMUSG00000019923	7322.78	-1.18594	0.353123	-3.35843	0.000783863	0.00343587
ENSMUSG00000019933	52.2608	0.398497	0.949554	0.419668	0.674728	0.746228
ENSMUSG00000019935	2205.85	-0.954323	0.384539	-2.48173	0.0130747	0.0340198
ENSMUSG00000019943	5790.09	0.693955	0.341729	2.03072	0.0422835	0.086912
ENSMUSG00000019944	537.118	-0.860062	0.455036	-1.8901	0.058745	0.112414
ENSMUSG00000019945	280.882	-2.46611	0.457025	-5.396	6.81411e-08	1.48197e-06
ENSMUSG00000019948	351.486	-0.354849	0.356562	-0.995196	0.319641	0.418657
ENSMUSG00000019971	1143.83	-0.693301	0.433115	-1.60073	0.109436	0.183949
ENSMUSG00000019975	522.236	-0.532516	0.326343	-1.63177	0.102728	0.174839
ENSMUSG00000019986	904.656	-0.223649	0.496537	-0.450418	0.652409	0.725742
ENSMUSG00000019987	168.845	4.77209	0.731331	6.52521	6.79062e-11	4.6535e-09
ENSMUSG00000020014	354.761	-1.33557	0.445589	-2.99731	0.00272374	0.00959519
ENSMUSG00000020018	179.592	1.24601	0.469935	2.65144	0.00801486	0.0231399
ENSMUSG00000020032	287.168	-0.228614	0.383896	-0.595511	0.551502	0.638322
ENSMUSG00000020048	9051.84	-0.472197	0.296235	-1.59399	0.110938	0.185765
ENSMUSG00000020056	890.883	0.865512	0.40926	2.11482	0.0344454	0.0733366
ENSMUSG00000020075	1392.5	2.0555	0.516869	3.97682	6.98419e-05	0.000489702
ENSMUSG00000020102	56.602	-2.45089	1.12478	-2.179	0.0293319	0.0644486
ENSMUSG00000020108	1831.66	1.34371	0.341811	3.93115	8.45406e-05	0.000568614
ENSMUSG00000020121	1430.84	-0.282852	0.292337	-0.967557	0.333266	0.432733
ENSMUSG00000020150	88.0081	1.50449	0.820026	1.83468	0.0665528	0.124575
ENSMUSG00000020153	4917.56	0.790601	0.297651	2.65614	0.00790419	0.0228385
ENSMUSG00000020163	6027.01	1.16949	0.407482	2.87003	0.00410432	0.0134175
ENSMUSG00000020175	799.715	-1.79045	0.441699	-4.05354	5.04489e-05	0.000372419
ENSMUSG00000020182	241.985	-2.5152	0.570442	-4.40921	1.03749e-05	0.000100484
ENSMUSG00000020205	1824.26	1.49367	0.39172	3.81311	0.000137226	0.00084619
ENSMUSG00000020219	3939.67	1.35922	0.305217	4.4533	8.45603e-06	8.60288e-05
ENSMUSG00000020220	516.5	-0.285315	0.580561	-0.491448	0.62311	0.701965
ENSMUSG00000020224	1070.21	1.64298	0.397171	4.1367	3.52329e-05	0.000275789
ENSMUSG00000020225	3809.96	-0.324812	0.270794	-1.19948	0.23034	0.32376
ENSMUSG00000020232	602.059	0.668955	0.341857	1.95683	0.0503679	0.100075
ENSMUSG00000020261	121.77	-0.50748	0.609124	-0.833131	0.404771	0.502204
ENSMUSG00000020297	993.873	-1.92691	0.555656	-3.46782	0.000524706	0.00246537
ENSMUSG00000020321	9596.83	-0.531744	0.386304	-1.37649	0.16867	0.256752
ENSMUSG00000020380	665.944	-0.192476	0.412946	-0.466104	0.641141	0.715955
ENSMUSG00000020385	977.4	-0.181803	0.427909	-0.424864	0.670936	0.742712
ENSMUSG00000020387	274.195	-0.221372	0.529328	-0.418212	0.675792	0.746817
ENSMUSG00000020390	3494.98	-0.344946	0.352855	-0.977587	0.328279	0.427964
ENSMUSG00000020431	292.392	-1.26193	0.618036	-2.04184	0.0411675	0.085003
ENSMUSG00000020435	280.567	-1.74347	0.476611	-3.65806	0.000254136	0.00136744
ENSMUSG00000020436	13.9578	-2.07232	1.63883	-1.26451	0.206046	0.299105
ENSMUSG00000020441	369.338	0.608674	0.353986	1.71949	0.0855258	0.151084
ENSMUSG00000020459	361.209	-0.322514	0.489905	-0.65832	0.510333	0.601404
ENSMUSG00000020460	4704.76	1.42266	0.305141	4.66229	3.1271e-06	3.71164e-05
ENSMUSG00000020462	3095.54	-0.106723	0.330419	-0.322992	0.746701	0.805236
ENSMUSG00000020486	491.757	-1.62354	0.546693	-2.96975	0.00298047	0.0103589
ENSMUSG00000020515	2616.58	-0.989881	0.401679	-2.46436	0.0137258	0.035306
ENSMUSG00000020526	533.312	-0.304884	0.48691	-0.626161	0.53121	0.619652
ENSMUSG00000020532	284.854	0.594281	0.695198	0.854838	0.392641	0.491072
ENSMUSG00000020561	609.973	0.855608	0.422734	2.02399	0.0429715	0.0879777
ENSMUSG00000020562	787.999	-0.882217	0.506085	-1.74322	0.0812952	0.144879
ENSMUSG00000020576	2556.58	-2.003	0.371897	-5.38589	7.20854e-08	1.54008e-06
ENSMUSG00000020577	20608.8	-1.65799	0.437164	-3.79261	0.000149071	0.000897888
ENSMUSG00000020594	1371.49	0.31387	0.339592	0.924255	0.355353	0.453972
ENSMUSG00000020599	202.232	-0.841242	0.553785	-1.51908	0.128743	0.208097
ENSMUSG00000020608	1382.39	0.287623	0.410837	0.70009	0.483871	0.578861
ENSMUSG00000020614	424.424	-0.360104	0.440771	-0.816987	0.413936	0.511192
ENSMUSG00000020621	1271.01	-0.345153	0.508788	-0.678384	0.497528	0.590916
ENSMUSG00000020627	59.3662	5.41786	1.089	4.97509	6.52182e-07	9.74784e-06
ENSMUSG00000020661	1506.91	-0.0577399	0.336818	-0.171428	0.863887	0.899995
ENSMUSG00000020680	95.7839	0.416529	0.64043	0.650389	0.515441	0.605655
ENSMUSG00000020694	760.124	-0.308555	0.410451	-0.751746	0.452204	0.548932
ENSMUSG00000020716	430.581	0.664418	0.412101	1.61227	0.106903	0.180592
ENSMUSG00000020719	10574.3	-0.475035	0.34296	-1.3851	0.166021	0.253464
ENSMUSG00000020721	764.906	-0.112996	0.33402	-0.33829	0.735145	0.796078
ENSMUSG00000020736	1395.94	1.39658	0.330936	4.22008	2.44213e-05	0.000205796
ENSMUSG00000020744	692.62	-0.895194	0.368636	-2.4284	0.0151657	0.0380926
ENSMUSG00000020752	336.074	-1.80297	0.526123	-3.42689	0.000610528	0.00278223
ENSMUSG00000020798	110.182	-1.6161	0.892908	-1.80994	0.0703059	0.129751
ENSMUSG00000020799	3380.79	-1.89252	0.382427	-4.94872	7.47034e-07	1.08529e-05
ENSMUSG00000020801	1376.37	-0.403026	0.35469	-1.13628	0.25584	0.351043
ENSMUSG00000020810	525.327	-1.22262	0.597762	-2.04533	0.0408228	0.0845316
ENSMUSG00000020812	108.431	0.577031	0.824828	0.699577	0.484191	0.578862
ENSMUSG00000020821	345.007	2.03584	0.686136	2.96711	0.0030061	0.0104294
ENSMUSG00000020834	318.211	-0.837195	0.502507	-1.66603	0.0957065	0.165684
ENSMUSG00000020863	2638.15	0.663459	0.349728	1.89707	0.0578187	0.111404
ENSMUSG00000020878	870.031	-1.26935	0.610033	-2.08079	0.0374528	0.0786292
ENSMUSG00000020895	1244.37	-1.13099	0.331788	-3.40877	0.000652564	0.00293855
ENSMUSG00000020904	1765.25	-1.24315	0.480125	-2.58922	0.0096193	0.0266697
ENSMUSG00000020921	984.069	-1.57604	0.388947	-4.05207	5.07664e-05	0.000374003
ENSMUSG00000020926	3740.09	-2.06582	0.402759	-5.12917	2.91018e-07	5.18127e-06
ENSMUSG00000020930	541.292	-2.1503	0.49874	-4.31147	1.62172e-05	0.000149116
ENSMUSG00000020937	876.509	-0.835839	0.381063	-2.19344	0.0282755	0.062316
ENSMUSG00000020982	1906.97	0.275343	0.423899	0.649549	0.515984	0.605936
ENSMUSG00000020990	100.523	-1.34529	0.583289	-2.30638	0.0210895	0.0494174
ENSMUSG00000021010	211.756	-0.968791	0.450528	-2.15035	0.0315278	0.0683636
ENSMUSG00000021040	1514.34	1.05973	0.402749	2.63123	0.00850765	0.0243497
ENSMUSG00000021061	1594.77	2.04855	0.541203	3.78518	0.0001536	0.000916054
ENSMUSG00000021068	1465.96	-1.25596	0.31686	-3.96376	7.3779e-05	0.00051041
ENSMUSG00000021090	139.603	-1.38263	0.689884	-2.00415	0.0450539	0.0914167
ENSMUSG00000021097	590.993	1.66354	0.474476	3.50606	0.000454787	0.00222382
ENSMUSG00000021114	4549.53	-0.0694144	0.307233	-0.225934	0.821253	0.866083
ENSMUSG00000021123	1049.29	-2.36736	0.38953	-6.07748	1.22088e-09	5.34247e-08
ENSMUSG00000021134	6907.31	-0.940539	0.553707	-1.69862	0.0893905	0.156692
ENSMUSG00000021188	2186.03	0.950599	0.440465	2.15817	0.0309144	0.0672745
ENSMUSG00000021190	10000.4	-1.67464	0.436431	-3.83712	0.000124485	0.000780882
ENSMUSG00000021194	655.61	-2.49817	0.379702	-6.5793	4.72678e-11	3.43353e-09
ENSMUSG00000021198	50.3581	-2.49814	0.842268	-2.96597	0.00301732	0.010457
ENSMUSG00000021200	62.3235	-1.84286	0.864341	-2.1321	0.0329989	0.0709603
ENSMUSG00000021217	236.014	0.0642289	0.503035	0.127683	0.8984	0.925671
ENSMUSG00000021240	198.871	-1.14882	0.817591	-1.40513	0.159982	0.246106
ENSMUSG00000021244	515.668	-0.153183	0.464786	-0.329577	0.741719	0.801525
ENSMUSG00000021256	11.2749	0.277958	1.85108	0.15016	0.880638	0.912027
ENSMUSG00000021258	251.944	0.22376	0.440085	0.508447	0.61114	0.690838
ENSMUSG00000021259	107.768	-0.998911	0.652028	-1.532	0.125521	0.203888
ENSMUSG00000021262	1979.25	-1.14677	0.440495	-2.60336	0.00923138	0.0258906
ENSMUSG00000021268	79.9533	1.18743	0.645461	1.83966	0.0658178	0.123623
ENSMUSG00000021270	24459.7	-0.889319	0.292267	-3.04283	0.00234368	0.00854644
ENSMUSG00000021273	3857.6	-1.38568	0.44669	-3.1021	0.00192151	0.00724707
ENSMUSG00000021290	10384.6	0.359543	0.383807	0.93678	0.348872	0.447602
ENSMUSG00000021313	160.16	-1.85919	0.611782	-3.03897	0.00237385	0.00859684
ENSMUSG00000021366	325.668	0.565878	0.588736	0.961174	0.336465	0.43582
ENSMUSG00000021368	1428.78	-1.18355	0.511965	-2.31178	0.02079	0.0489049
ENSMUSG00000021377	3371.34	0.460347	0.304152	1.51355	0.130141	0.209425
ENSMUSG00000021379	7356.27	-1.17247	0.391014	-2.99853	0.00271288	0.00958481
ENSMUSG00000021396	64.8211	0.83657	0.896345	0.933313	0.350659	0.449239
ENSMUSG00000021413	1436.74	0.0749207	0.445709	0.168093	0.86651	0.901766
ENSMUSG00000021431	378.261	0.737925	0.448096	1.6468	0.0995992	0.170393
ENSMUSG00000021432	467.278	-0.924163	0.471563	-1.95979	0.0500207	0.0995481
ENSMUSG00000021488	1165.72	0.480138	0.37443	1.28232	0.199731	0.29251
ENSMUSG00000021495	344.668	0.171001	0.375223	0.455732	0.648582	0.722575
ENSMUSG00000021496	447.934	1.00102	0.460833	2.17219	0.0298415	0.0655285
ENSMUSG00000021497	3672.96	-0.773305	0.448622	-1.72373	0.0847559	0.150016
ENSMUSG00000021500	2544.89	0.363331	0.383329	0.947833	0.343215	0.442198
ENSMUSG00000021501	859.765	-0.662448	0.487037	-1.36016	0.173779	0.262439
ENSMUSG00000021508	9417.85	-1.60706	0.382876	-4.19733	2.70078e-05	0.000222431
ENSMUSG00000021509	18.5648	7.51106	1.93141	3.8889	0.0001007	0.00065781
ENSMUSG00000021534	281.845	-0.670323	0.627647	-1.06799	0.285524	0.381539
ENSMUSG00000021552	720.836	0.977213	0.352584	2.77157	0.00557861	0.0171853
ENSMUSG00000021594	476.465	-1.56383	0.529147	-2.95538	0.00312283	0.0107508
ENSMUSG00000021597	450.03	-0.672478	0.509198	-1.32066	0.186615	0.276873
ENSMUSG00000021606	3098.47	1.06385	0.336744	3.15922	0.00158194	0.0061883
ENSMUSG00000021621	729.378	0.548478	0.353816	1.55018	0.121099	0.19857
ENSMUSG00000021640	11.1948	-2.79527	2.71909	-1.02802	0.303942	0.400701
ENSMUSG00000021643	712.441	0.0112875	0.497967	0.0226671	0.981916	0.985565
ENSMUSG00000021647	299.33	-4.98383	1.81269	-2.74942	0.00597012	0.0181452
ENSMUSG00000021661	794.11	-0.197239	0.353379	-0.558151	0.576741	0.661213
ENSMUSG00000021662	1548.71	-1.08327	0.322262	-3.36145	0.000775349	0.00340516
ENSMUSG00000021669	374.566	1.87944	0.489686	3.83804	0.000124019	0.000779306
ENSMUSG00000021690	1163.12	0.0645638	0.332194	0.194356	0.845897	0.884879
ENSMUSG00000021693	810.543	-0.230999	0.396076	-0.58322	0.559745	0.64601
ENSMUSG00000021700	94.5388	-1.29328	0.978608	-1.32155	0.186317	0.27677
ENSMUSG00000021704	96.9382	-0.0617478	0.629594	-0.0980756	0.921872	0.945964
ENSMUSG00000021716	1033.43	0.481029	0.368981	1.30367	0.192347	0.283755
ENSMUSG00000021728	1387.72	-1.67529	0.460082	-3.64128	0.000271286	0.00144474
ENSMUSG00000021748	1998.01	-0.63958	0.499282	-1.281	0.200194	0.293069
ENSMUSG00000021754	1496.72	0.152887	0.367553	0.41596	0.677439	0.748315
ENSMUSG00000021764	2751.41	0.6866	0.306475	2.24032	0.0250705	0.05691
ENSMUSG00000021767	308.142	0.600313	0.44784	1.34046	0.180094	0.269511
ENSMUSG00000021772	761.587	-0.116627	0.311827	-0.374011	0.708396	0.774735
ENSMUSG00000021773	105.094	1.20579	0.577711	2.08718	0.0368714	0.0777232
ENSMUSG00000021786	103.782	1.4232	0.898064	1.58475	0.113024	0.188477
ENSMUSG00000021790	51.5324	-2.16732	0.794854	-2.72669	0.00639722	0.0191705
ENSMUSG00000021791	246.863	-1.85397	0.528629	-3.50712	0.000452982	0.00222029
ENSMUSG00000021798	674.665	-1.73184	0.342686	-5.05371	4.33301e-07	7.05717e-06
ENSMUSG00000021803	231.117	-1.09266	0.553459	-1.97424	0.0483545	0.0970297
ENSMUSG00000021811	1214.53	-0.364318	0.325482	-1.11932	0.263004	0.359182
ENSMUSG00000021815	244.359	-1.92293	0.535433	-3.59135	0.000328972	0.00168049
ENSMUSG00000021816	1175.09	0.0857423	0.303317	0.282682	0.777421	0.82998
ENSMUSG00000021820	295.441	0.328827	0.402782	0.81639	0.414277	0.511439
ENSMUSG00000021843	3565.16	0.018122	0.384472	0.0471348	0.962406	0.973123
ENSMUSG00000021886	72.6579	9.48367	1.58731	5.97467	2.30552e-09	8.81437e-08
ENSMUSG00000021900	550.498	-0.813188	0.337614	-2.40863	0.0160124	0.0395358
ENSMUSG00000021913	441.123	-3.19546	0.465254	-6.86821	6.50135e-12	6.94497e-10
ENSMUSG00000021916	679.065	-0.954042	0.413528	-2.30708	0.0210504	0.0493896
ENSMUSG00000021928	486.282	-0.0323984	0.505091	-0.0641436	0.948856	0.963984
ENSMUSG00000021936	280.764	0.890345	0.433972	2.05162	0.0402068	0.0835419
ENSMUSG00000021972	274.62	-0.304484	0.456712	-0.666688	0.504971	0.596635
ENSMUSG00000022000	1949.91	0.211587	0.381682	0.554354	0.579337	0.662143
ENSMUSG00000022014	26.9586	8.05775	1.79951	4.47773	7.54393e-06	7.80614e-05
ENSMUSG00000022016	771.907	-1.1056	0.424569	-2.60406	0.0092126	0.0258779
ENSMUSG00000022020	532.261	-0.562936	0.465056	-1.21047	0.226099	0.319406
ENSMUSG00000022023	2271.25	0.828062	0.326645	2.53505	0.0112432	0.0301145
ENSMUSG00000022035	1165	-0.10741	0.434601	-0.247147	0.804794	0.85219
ENSMUSG00000022048	1153.56	-0.60582	0.3607	-1.67957	0.0930412	0.161997
ENSMUSG00000022054	5657.75	-0.353531	0.494145	-0.71544	0.474337	0.570181
ENSMUSG00000022055	2815.18	-1.30916	0.348601	-3.75546	0.000173022	0.00101049
ENSMUSG00000022070	116.287	-1.34366	0.540942	-2.48393	0.0129942	0.0338557
ENSMUSG00000022114	617.875	0.738146	0.432119	1.7082	0.0875994	0.154297
ENSMUSG00000022123	79.1218	-1.78628	0.750003	-2.3817	0.0172331	0.0419507
ENSMUSG00000022141	1523.61	0.256551	0.461302	0.556146	0.578111	0.662143
ENSMUSG00000022151	1110.72	-1.24826	0.534244	-2.3365	0.0194654	0.0463901
ENSMUSG00000022174	11898.1	0.0956967	0.273996	0.349263	0.726892	0.788788
ENSMUSG00000022176	233.972	-2.03828	0.55335	-3.68353	0.000230027	0.00126393
ENSMUSG00000022185	1125.11	0.518083	0.474807	1.09114	0.27521	0.371033
ENSMUSG00000022194	482.439	-0.192375	0.405451	-0.474472	0.635164	0.711352
ENSMUSG00000022205	6879.8	0.506434	0.308472	1.64175	0.100642	0.171691
ENSMUSG00000022209	29.1893	8.16606	1.95395	4.17927	2.92449e-05	0.000237092
ENSMUSG00000022217	248.957	2.01548	0.547726	3.67973	0.000233485	0.00127906
ENSMUSG00000022228	347.37	-0.523661	0.442585	-1.18319	0.236734	0.3307
ENSMUSG00000022236	103.562	-0.75663	0.622483	-1.2155	0.224174	0.31787
ENSMUSG00000022244	576.778	-0.403662	0.429215	-0.940465	0.346979	0.445523
ENSMUSG00000022245	736.73	-2.1167	0.419087	-5.05073	4.40121e-07	7.10453e-06
ENSMUSG00000022255	3050.33	1.04133	0.401087	2.59628	0.00942396	0.0262697
ENSMUSG00000022257	4250.37	-1.86605	0.304915	-6.11989	9.36388e-10	4.14751e-08
ENSMUSG00000022262	771.28	-1.52544	0.484911	-3.14582	0.00165623	0.0064199
ENSMUSG00000022263	756.352	0.621201	0.547921	1.13374	0.256903	0.351837
ENSMUSG00000022269	86.1715	-1.35467	0.738304	-1.83485	0.0665286	0.124575
ENSMUSG00000022311	40.1761	7.13014	2.23258	3.19368	0.00140474	0.00564381
ENSMUSG00000022314	1752.79	0.10134	0.425153	0.238363	0.8116	0.857646
ENSMUSG00000022323	1682.34	0.725815	0.50954	1.42445	0.154315	0.239519
ENSMUSG00000022324	150.574	-1.37852	0.576482	-2.39127	0.0167902	0.041079
ENSMUSG00000022340	554.765	-2.05669	0.373981	-5.49946	3.80953e-08	9.4124e-07
ENSMUSG00000022353	1282.8	-0.6444	0.33939	-1.8987	0.0576041	0.111218
ENSMUSG00000022358	6711.72	-0.86693	0.297813	-2.91099	0.00360291	0.0120717
ENSMUSG00000022372	6.63519	-0.891856	2.29533	-0.388552	0.697607	0.76524
ENSMUSG00000022375	351.321	-0.657175	0.487222	-1.34882	0.177395	0.26679
ENSMUSG00000022386	256.365	-1.33295	0.619466	-2.15177	0.0314154	0.0682013
ENSMUSG00000022387	826.655	0.166305	0.318365	0.522372	0.601411	0.681963
ENSMUSG00000022390	541.841	0.899228	0.420033	2.14085	0.0322861	0.0697165
ENSMUSG00000022431	105.446	-2.19794	1.16849	-1.88101	0.0599709	0.114398
ENSMUSG00000022438	69.2567	4.10535	0.751983	5.45937	4.77838e-08	1.14178e-06
ENSMUSG00000022450	4562.71	1.60865	0.406204	3.96022	7.48813e-05	0.00051658
ENSMUSG00000022454	36.815	-1.24179	1.01401	-1.22463	0.220717	0.31437
ENSMUSG00000022464	32.4707	-2.2826	1.56777	-1.45596	0.145404	0.229014
ENSMUSG00000022466	1271.22	-0.593886	0.29445	-2.01694	0.0437022	0.0892223
ENSMUSG00000022504	66.3421	1.23809	1.13046	1.09521	0.273424	0.369222
ENSMUSG00000022521	2232.79	0.179799	0.343747	0.523055	0.600936	0.681636
ENSMUSG00000022523	191.374	-1.99571	0.676892	-2.94834	0.00319489	0.0109573
ENSMUSG00000022528	1077.85	2.75434	0.428933	6.42139	1.35034e-10	8.04007e-09
ENSMUSG00000022540	1180.03	-0.799987	0.341839	-2.34025	0.019271	0.0460173
ENSMUSG00000022546	80.8989	1.10534	0.705681	1.56635	0.117267	0.194392
ENSMUSG00000022550	418.626	-0.87767	0.35384	-2.48041	0.013123	0.0341179
ENSMUSG00000022577	155.675	-1.53941	0.694997	-2.21499	0.0267606	0.059592
ENSMUSG00000022580	1173.95	-1.36786	0.401517	-3.40673	0.000657472	0.00294807
ENSMUSG00000022610	523.217	-1.04021	0.427194	-2.43498	0.0148927	0.0376875
ENSMUSG00000022617	780.016	0.0744972	0.365274	0.203949	0.838393	0.878801
ENSMUSG00000022621	1061.41	-1.68291	0.450006	-3.73976	0.000184198	0.00105929
ENSMUSG00000022623	42.4691	6.30306	1.37385	4.58788	4.4776e-06	5.03487e-05
ENSMUSG00000022629	3408.17	-0.0316254	0.322999	-0.0979117	0.922002	0.945964
ENSMUSG00000022657	84.0046	-0.89567	1.05704	-0.847336	0.396808	0.49526
ENSMUSG00000022671	473.365	0.452713	0.365352	1.23912	0.215302	0.308838
ENSMUSG00000022684	884.169	-0.446682	0.352648	-1.26665	0.205281	0.298478
ENSMUSG00000022701	891.78	-0.457198	0.395314	-1.15654	0.247459	0.342258
ENSMUSG00000022708	10876.2	1.64687	0.422481	3.8981	9.69508e-05	0.000635605
ENSMUSG00000022742	704.245	-0.919206	0.499093	-1.84175	0.0655112	0.123287
ENSMUSG00000022756	1670.17	-2.44533	0.291546	-8.38747	4.96727e-17	1.12757e-14
ENSMUSG00000022759	161.305	-2.45231	0.650987	-3.76707	0.000165177	0.000975085
ENSMUSG00000022763	62.8502	1.6257	0.729196	2.22944	0.0257844	0.0580229
ENSMUSG00000022783	878.175	-2.36113	0.432841	-5.45495	4.89858e-08	1.1553e-06
ENSMUSG00000022787	222.472	-0.360704	0.456537	-0.790087	0.429477	0.526802
ENSMUSG00000022791	488.634	0.330795	0.4128	0.801343	0.422933	0.520357
ENSMUSG00000022802	450.539	-1.00021	0.418299	-2.39115	0.0167958	0.041079
ENSMUSG00000022805	584.127	-1.47135	0.443414	-3.31823	0.0009059	0.00388916
ENSMUSG00000022820	2611.64	0.722686	0.399138	1.81061	0.0702006	0.129711
ENSMUSG00000022837	703.422	-0.926375	0.409967	-2.25963	0.0238441	0.0546382
ENSMUSG00000022838	62.6191	0.681506	1.05556	0.645637	0.518515	0.608283
ENSMUSG00000022856	1737.14	-1.78674	0.518593	-3.44536	0.000570306	0.00263866
ENSMUSG00000022871	64.0771	-4.07859	0.931665	-4.37774	1.19917e-05	0.000114015
ENSMUSG00000022884	3927.63	-0.725948	0.339954	-2.13543	0.032726	0.0705405
ENSMUSG00000022890	10532.2	0.126112	0.363451	0.346985	0.728603	0.789936
ENSMUSG00000022911	538.935	0.398676	0.569158	0.700466	0.483636	0.57877
ENSMUSG00000022913	924.088	-0.0835733	0.363088	-0.230174	0.817957	0.863217
ENSMUSG00000022940	1238.16	-0.921647	0.298493	-3.08766	0.00201737	0.00753815
ENSMUSG00000022948	131.269	-0.28107	0.637003	-0.441237	0.659041	0.732223
ENSMUSG00000022960	507.152	-1.64954	0.359627	-4.58682	4.50041e-06	5.0449e-05
ENSMUSG00000022961	8183.48	0.507955	0.430425	1.18013	0.23795	0.331725
ENSMUSG00000022972	3091.54	0.213257	0.3844	0.554781	0.579045	0.662143
ENSMUSG00000022973	1147.94	-0.758349	0.38189	-1.98578	0.047058	0.0948998
ENSMUSG00000022974	418.29	0.0371415	0.505861	0.0734224	0.94147	0.958827
ENSMUSG00000022982	6452.19	1.08592	0.478493	2.26946	0.0232401	0.0535924
ENSMUSG00000022995	3427.17	1.11616	0.368174	3.03162	0.00243249	0.00875598
ENSMUSG00000023011	1739.36	-2.24716	0.459259	-4.89302	9.93028e-07	1.38718e-05
ENSMUSG00000023017	786.68	-1.92312	0.449318	-4.28009	1.86819e-05	0.000167125
ENSMUSG00000023020	2558.27	1.38417	0.315	4.39419	1.11189e-05	0.000106273
ENSMUSG00000023021	2105.03	-2.03955	0.399554	-5.10457	3.31543e-07	5.68002e-06
ENSMUSG00000023032	330.653	0.0361621	0.395021	0.0915448	0.92706	0.949705
ENSMUSG00000023033	174.925	-0.94492	0.499449	-1.89193	0.0585009	0.112243
ENSMUSG00000023052	15.6757	4.88278	1.82411	2.67681	0.00743276	0.0217182
ENSMUSG00000023067	8812.48	3.08731	0.327039	9.44019	3.72116e-21	1.22866e-18
ENSMUSG00000023078	24.9151	7.94108	4.40938	1.80095	0.0717103	0.131674
ENSMUSG00000023089	4950.79	0.981178	0.315668	3.10826	0.00188193	0.00713482
ENSMUSG00000023094	230.383	-0.269224	0.493688	-0.545333	0.585525	0.66791
ENSMUSG00000023147	1257.53	-1.55532	0.334161	-4.6544	3.2492e-06	3.79457e-05
ENSMUSG00000023169	1835.74	-0.916684	0.297492	-3.08137	0.00206049	0.0076709
ENSMUSG00000023192	14.4428	-3.15184	1.53356	-2.05524	0.0398559	0.082955
ENSMUSG00000023235	147.495	-0.500009	0.56185	-0.889932	0.373502	0.47234
ENSMUSG00000023236	5887.93	-1.89016	0.385386	-4.90459	9.36243e-07	1.318e-05
ENSMUSG00000023272	4028.15	-0.923052	0.504099	-1.83109	0.0670864	0.125338
ENSMUSG00000023277	3856.85	-1.48318	0.426049	-3.48124	0.000499094	0.0023603
ENSMUSG00000023393	111.583	6.12708	1.21003	5.06358	4.11464e-07	6.76215e-06
ENSMUSG00000023473	247.377	-1.74077	0.565155	-3.08017	0.00206884	0.00769092
ENSMUSG00000023707	800.366	-0.248608	0.334179	-0.743936	0.456915	0.553356
ENSMUSG00000023791	1284.19	-0.700542	0.396391	-1.7673	0.0771782	0.1397
ENSMUSG00000023827	1517.2	-1.4798	0.437064	-3.38578	0.000709757	0.00315525
ENSMUSG00000023868	134.724	-1.92975	0.59411	-3.24813	0.00116167	0.00479998
ENSMUSG00000023927	418.912	-0.678671	0.346566	-1.95827	0.0501979	0.099846
ENSMUSG00000023931	210.007	-0.770594	0.469523	-1.64123	0.10075	0.171796
ENSMUSG00000023935	31.5621	0.575737	1.50297	0.383066	0.701671	0.768074
ENSMUSG00000023939	1937.68	1.33646	0.37976	3.51923	0.000432794	0.00214196
ENSMUSG00000023944	45088.2	-0.0464332	0.285896	-0.162413	0.87098	0.903743
ENSMUSG00000023952	423.25	0.305401	0.455339	0.670712	0.502404	0.594182
ENSMUSG00000023961	1569.38	-1.37879	0.394086	-3.49871	0.000467507	0.00225101
ENSMUSG00000023966	2635.42	-0.841591	0.342963	-2.45388	0.0141324	0.0361443
ENSMUSG00000023968	1274.61	-1.69137	0.370219	-4.56856	4.91076e-06	5.37225e-05
ENSMUSG00000023978	820.474	-1.41271	0.451345	-3.13	0.00174806	0.00669721
ENSMUSG00000023992	231.273	7.06368	0.829917	8.51131	1.7198e-17	4.16421e-15
ENSMUSG00000024011	10.4985	2.40455	2.08796	1.15162	0.249476	0.344524
ENSMUSG00000024019	179.31	-0.636856	0.50544	-1.26	0.207668	0.300617
ENSMUSG00000024030	265.818	1.49936	0.493594	3.03765	0.00238432	0.00861677
ENSMUSG00000024033	3222.73	-0.383227	0.42022	-0.911967	0.361786	0.459765
ENSMUSG00000024038	3786.46	0.242439	0.407837	0.594451	0.552211	0.638939
ENSMUSG00000024052	2871.27	-0.72336	0.284662	-2.54112	0.0110498	0.0297502
ENSMUSG00000024059	910.823	-1.50976	0.388847	-3.88265	0.000103325	0.000670138
ENSMUSG00000024063	252.766	0.71518	0.4992	1.43265	0.151958	0.236567
ENSMUSG00000024073	865.219	0.943629	0.345361	2.7323	0.00628938	0.0188941
ENSMUSG00000024074	3530.29	-1.33918	0.287516	-4.65776	3.19669e-06	3.76592e-05
ENSMUSG00000024081	992.119	0.7958	0.377499	2.10808	0.0350237	0.0743895
ENSMUSG00000024084	957.082	-0.96298	0.515438	-1.86828	0.0617235	0.117188
ENSMUSG00000024096	2977.91	1.69064	0.336097	5.03022	4.89916e-07	7.80428e-06
ENSMUSG00000024097	3010.81	-0.0810452	0.430076	-0.188444	0.850529	0.888666
ENSMUSG00000024101	242.215	0.27451	0.451871	0.607495	0.543522	0.630694
ENSMUSG00000024109	27.9285	-6.2252	1.33726	-4.65518	3.23699e-06	3.7925e-05
ENSMUSG00000024155	39.018	-1.59203	1.05112	-1.5146	0.129873	0.209299
ENSMUSG00000024158	2034.61	-0.752044	0.324367	-2.3185	0.0204222	0.0481958
ENSMUSG00000024175	603.825	-0.641666	0.51567	-1.24433	0.213377	0.306803
ENSMUSG00000024186	400.441	-2.58873	0.510146	-5.07448	3.88555e-07	6.47354e-06
ENSMUSG00000024188	1423.32	-0.124011	0.320042	-0.387485	0.698397	0.765875
ENSMUSG00000024194	2435.42	0.524058	0.283408	1.84913	0.064439	0.121644
ENSMUSG00000024205	145.294	1.45204	0.572434	2.53661	0.0111931	0.0300468
ENSMUSG00000024208	3330.42	1.79435	0.321097	5.58818	2.29462e-08	6.26621e-07
ENSMUSG00000024217	840.118	0.807003	0.337218	2.39312	0.0167058	0.0409141
ENSMUSG00000024227	658.382	-1.64118	0.445123	-3.68703	0.000226884	0.00125082
ENSMUSG00000024247	115.146	-0.779156	0.627219	-1.24224	0.214149	0.307669
ENSMUSG00000024253	1086.16	-0.864297	0.536012	-1.61246	0.106862	0.180592
ENSMUSG00000024290	2163.57	0.333859	0.37556	0.888961	0.374024	0.472671
ENSMUSG00000024309	1822.46	0.680601	0.319805	2.12817	0.0333227	0.0715297
ENSMUSG00000024339	907.278	-0.805321	0.483261	-1.66643	0.0956273	0.165626
ENSMUSG00000024346	2403.24	2.10271	0.336168	6.25493	3.97691e-10	1.95191e-08
ENSMUSG00000024349	1134.48	-1.49852	0.405923	-3.69164	0.000222815	0.00123363
ENSMUSG00000024350	863.437	-0.688157	0.33682	-2.0431	0.0410429	0.0847939
ENSMUSG00000024378	513.183	-0.0276886	0.478378	-0.0578803	0.953844	0.967158
ENSMUSG00000024393	884.566	-0.0219106	0.520238	-0.0421166	0.966406	0.974455
ENSMUSG00000024397	295.555	11.5103	1.60518	7.17075	7.45899e-13	9.34174e-11
ENSMUSG00000024413	832.259	0.00730958	0.361037	0.0202461	0.983847	0.986836
ENSMUSG00000024446	1043.93	1.01575	0.346494	2.9315	0.00337331	0.0114611
ENSMUSG00000024456	835.487	1.62442	0.43147	3.76486	0.00016664	0.000980933
ENSMUSG00000024462	789.661	0.492032	0.395314	1.24466	0.213255	0.30675
ENSMUSG00000024472	311.688	0.699772	0.533477	1.31172	0.189615	0.280751
ENSMUSG00000024474	2231.71	-0.734845	0.341635	-2.15097	0.0314787	0.0682979
ENSMUSG00000024491	1336.64	0.73902	0.392325	1.88369	0.0596068	0.113927
ENSMUSG00000024497	4397.58	-1.04597	0.374851	-2.79035	0.00526511	0.0164004
ENSMUSG00000024502	10.1874	-1.50881	2.54931	-0.591851	0.55395	0.640748
ENSMUSG00000024517	87.0853	0.667682	1.15488	0.57814	0.56317	0.649138
ENSMUSG00000024521	44.812	-3.20669	1.31733	-2.43424	0.0149233	0.0376875
ENSMUSG00000024524	177.097	-0.911555	0.519623	-1.75426	0.0793856	0.142455
ENSMUSG00000024537	860.677	-0.341775	0.401735	-0.850747	0.39491	0.493704
ENSMUSG00000024548	491.277	0.527643	0.412693	1.27854	0.201061	0.293746
ENSMUSG00000024575	23.8164	0.737873	1.16167	0.635184	0.525308	0.614269
ENSMUSG00000024579	128.576	-3.29082	0.591498	-5.56353	2.64364e-08	7.10614e-07
ENSMUSG00000024598	75.1338	0.591955	0.66799	0.886174	0.375524	0.474401
ENSMUSG00000024610	510.957	4.13661	0.871247	4.74792	2.05523e-06	2.62838e-05
ENSMUSG00000024639	1323.01	1.18571	0.361528	3.27972	0.0010391	0.00438073
ENSMUSG00000024666	991.49	-1.50423	0.320628	-4.6915	2.71208e-06	3.28343e-05
ENSMUSG00000024667	876.13	-0.602583	0.341866	-1.76263	0.0779629	0.140601
ENSMUSG00000024672	306.754	6.85436	0.844397	8.11746	4.76034e-16	9.09977e-14
ENSMUSG00000024675	49.6803	8.93881	1.66055	5.38304	7.32379e-08	1.55556e-06
ENSMUSG00000024679	144.952	5.32175	0.934765	5.69314	1.24721e-08	3.65313e-07
ENSMUSG00000024691	74.4848	9.52209	1.58995	5.98894	2.11214e-09	8.24871e-08
ENSMUSG00000024695	2244.46	0.702783	0.334809	2.09906	0.0358116	0.0757529
ENSMUSG00000024713	767.808	-1.4641	0.382347	-3.82923	0.000128542	0.0008008
ENSMUSG00000024725	2875.24	-0.436596	0.304204	-1.43521	0.151228	0.235653
ENSMUSG00000024737	81.6246	4.118	1.14623	3.59264	0.00032734	0.0016745
ENSMUSG00000024743	97.8272	-0.154606	0.56408	-0.274086	0.784019	0.83506
ENSMUSG00000024749	4702.12	-1.56891	0.318466	-4.92646	8.3731e-07	1.20202e-05
ENSMUSG00000024769	170.346	0.646167	0.614022	1.05235	0.292638	0.389327
ENSMUSG00000024786	16.2414	-7.77857	2.01208	-3.86593	0.000110665	0.000708039
ENSMUSG00000024799	793.408	-1.33826	0.435646	-3.07191	0.00212693	0.00787462
ENSMUSG00000024846	7174.79	1.05105	0.300005	3.50344	0.000459287	0.00223218
ENSMUSG00000024853	7953.49	0.0527645	0.325301	0.162202	0.871147	0.903743
ENSMUSG00000024857	21468.8	-0.94096	0.447304	-2.10363	0.035411	0.0750366
ENSMUSG00000024863	20.3611	7.65486	2.63319	2.90706	0.00364843	0.0122017
ENSMUSG00000024869	233.964	0.585352	0.554571	1.0555	0.291195	0.387953
ENSMUSG00000024889	1110.09	-0.467082	0.385757	-1.21082	0.225965	0.319406
ENSMUSG00000024897	6548.33	-1.35575	0.363141	-3.73338	0.000188925	0.00107889
ENSMUSG00000024924	249.787	0.0557401	0.428948	0.129946	0.896609	0.92435
ENSMUSG00000024925	1084.13	1.23574	0.412519	2.9956	0.00273903	0.00963036
ENSMUSG00000024974	2678.07	0.208657	0.402021	0.51902	0.603746	0.683757
ENSMUSG00000024975	859.209	0.719046	0.318118	2.26031	0.023802	0.0545764
ENSMUSG00000025047	843.832	0.635625	0.470704	1.35037	0.176897	0.266262
ENSMUSG00000025050	386.735	-0.332381	0.384662	-0.864087	0.38754	0.486031
ENSMUSG00000025060	5378.11	-1.28286	0.303216	-4.23085	2.32815e-05	0.000197566
ENSMUSG00000025077	199.456	-0.968289	0.566835	-1.70824	0.0875924	0.154297
ENSMUSG00000025129	4162.57	-1.55344	0.463143	-3.35412	0.000796182	0.00347147
ENSMUSG00000025144	1074.76	0.588234	0.444707	1.32274	0.18592	0.276294
ENSMUSG00000025175	200.375	-1.17227	0.44326	-2.64465	0.00817747	0.0235906
ENSMUSG00000025204	3946.95	1.23723	0.277194	4.46341	8.06657e-06	8.2953e-05
ENSMUSG00000025207	34.1548	-0.966907	1.27925	-0.755837	0.449747	0.546315
ENSMUSG00000025208	1539.04	-0.100769	0.325764	-0.309333	0.757068	0.813512
ENSMUSG00000025219	34.3975	-1.81141	0.9956	-1.81942	0.0688479	0.127971
ENSMUSG00000025255	350.219	1.73186	0.618982	2.79791	0.00514341	0.016132
ENSMUSG00000025257	125.546	-0.555516	0.608429	-0.913034	0.361225	0.459416
ENSMUSG00000025261	1740.22	0.31297	0.447593	0.699231	0.484408	0.578876
ENSMUSG00000025290	3163.62	1.59283	0.418892	3.80247	0.000143261	0.000874494
ENSMUSG00000025352	246.103	1.58686	0.475368	3.33817	0.000843318	0.00365942
ENSMUSG00000025362	2888.24	2.19483	0.364259	6.02546	1.68631e-09	6.95987e-08
ENSMUSG00000025380	2515.96	-1.27702	0.414211	-3.08303	0.00204905	0.00764866
ENSMUSG00000025409	275.341	0.59337	0.484283	1.22525	0.220479	0.314155
ENSMUSG00000025420	341.843	-1.11966	0.633583	-1.76719	0.0771964	0.1397
ENSMUSG00000025427	75.3957	-0.943212	0.643308	-1.46619	0.142596	0.225064
ENSMUSG00000025470	487.171	-0.0447006	0.337925	-0.13228	0.894763	0.922709
ENSMUSG00000025475	292.097	-1.07402	0.495069	-2.16944	0.0300495	0.0658262
ENSMUSG00000025481	280.788	2.47253	0.583596	4.23671	2.26816e-05	0.000193834
ENSMUSG00000025488	202.316	0.232409	0.580926	0.400066	0.689108	0.758207
ENSMUSG00000025508	5717.64	1.86975	0.300973	6.21236	5.21944e-10	2.46195e-08
ENSMUSG00000025515	54.9818	1.52505	0.980672	1.55511	0.119921	0.197082
ENSMUSG00000025544	5712.64	-1.20889	0.402168	-3.00594	0.00264762	0.00939996
ENSMUSG00000025571	1213.53	0.0956995	0.342291	0.279585	0.779796	0.831782
ENSMUSG00000025576	340.888	-1.76402	0.514307	-3.42991	0.000603792	0.00275846
ENSMUSG00000025578	245.392	-0.283504	0.508177	-0.557885	0.576923	0.661213
ENSMUSG00000025616	1317.17	0.285978	0.35258	0.811103	0.417307	0.514655
ENSMUSG00000025723	88.7485	-0.301347	0.610009	-0.494004	0.621303	0.700246
ENSMUSG00000025731	2160.23	0.565397	0.295161	1.91556	0.0554217	0.107931
ENSMUSG00000025733	276.465	0.489486	0.427538	1.14489	0.252253	0.347302
ENSMUSG00000025738	201.718	-1.36706	0.59601	-2.29369	0.0218085	0.0509379
ENSMUSG00000025757	3864.49	-0.607602	0.284321	-2.13703	0.0325955	0.070301
ENSMUSG00000025777	521.173	-0.979804	0.481836	-2.03348	0.0420042	0.0864848
ENSMUSG00000025782	664.194	0.132256	0.413582	0.319782	0.749134	0.806657
ENSMUSG00000025790	1686.98	-0.758847	0.312339	-2.42956	0.015117	0.0380492
ENSMUSG00000025813	389.088	-0.579956	0.35052	-1.65456	0.0980141	0.168714
ENSMUSG00000025816	313.466	-2.07464	0.639643	-3.24344	0.00118097	0.00486313
ENSMUSG00000025860	661.564	1.12947	0.357788	3.15681	0.00159507	0.00622267
ENSMUSG00000025867	564.847	-0.337408	0.474494	-0.711091	0.477028	0.572714
ENSMUSG00000025868	2535.45	0.686185	0.295943	2.31864	0.0204144	0.0481958
ENSMUSG00000025893	213.674	-0.0803102	0.522451	-0.153718	0.877832	0.909899
ENSMUSG00000025898	666.832	1.41049	0.463796	3.04119	0.00235642	0.00857568
ENSMUSG00000025916	139.419	-1.82955	0.833275	-2.19561	0.0281196	0.0620475
ENSMUSG00000025922	54.9994	1.49959	0.695883	2.15495	0.0311661	0.067741
ENSMUSG00000025925	590.849	-0.504263	0.507772	-0.993091	0.320666	0.419437
ENSMUSG00000025934	15.4382	-3.34058	1.67243	-1.99744	0.0457773	0.0925657
ENSMUSG00000025949	487.936	-0.578404	0.452341	-1.27869	0.201006	0.293746
ENSMUSG00000025950	2136.68	-0.998512	0.407682	-2.44924	0.0143157	0.0365387
ENSMUSG00000025955	364.836	-2.49644	0.415354	-6.01038	1.85089e-09	7.38727e-08
ENSMUSG00000025959	418.699	-0.296629	0.445948	-0.665164	0.505946	0.597356
ENSMUSG00000025963	151.846	-2.71046	0.527576	-5.13758	2.78295e-07	4.97914e-06
ENSMUSG00000025967	2951.69	1.06187	0.306312	3.46662	0.000527049	0.00247318
ENSMUSG00000025997	373.757	0.441496	0.364691	1.2106	0.226048	0.319406
ENSMUSG00000026000	976.512	-0.879128	0.357051	-2.4622	0.013809	0.0354948
ENSMUSG00000026014	1537.78	-0.68269	0.287833	-2.37182	0.0177005	0.0429161
ENSMUSG00000026017	185.647	-0.640267	0.506673	-1.26367	0.206348	0.299423
ENSMUSG00000026023	991.391	-1.47414	0.451645	-3.26394	0.00109874	0.00457115
ENSMUSG00000026032	3646.52	0.820392	0.298539	2.74802	0.00599562	0.0181855
ENSMUSG00000026034	1302.41	0.199608	0.417064	0.478604	0.63222	0.709328
ENSMUSG00000026058	89.3564	-2.14504	0.956042	-2.24366	0.024854	0.0565954
ENSMUSG00000026074	2093.3	0.598671	0.38579	1.55181	0.120709	0.198158
ENSMUSG00000026083	4384.12	0.667539	0.437916	1.52435	0.127421	0.206235
ENSMUSG00000026088	798.09	0.184376	0.437762	0.421178	0.673625	0.745235
ENSMUSG00000026096	136.152	-1.54004	0.585618	-2.62976	0.00854443	0.0244165
ENSMUSG00000026102	1067.32	-1.01073	0.354086	-2.85449	0.00431062	0.0139166
ENSMUSG00000026126	49.2926	0.47062	0.718886	0.654652	0.512692	0.602923
ENSMUSG00000026131	1852.79	-0.777487	0.387432	-2.00677	0.0447743	0.0910018
ENSMUSG00000026154	743.13	0.0752568	0.349687	0.215212	0.829602	0.872151
ENSMUSG00000026155	1040.38	0.366521	0.362298	1.01166	0.311703	0.409643
ENSMUSG00000026176	321.614	1.60385	0.63457	2.52746	0.0114892	0.0307055
ENSMUSG00000026189	413.81	-0.343458	0.407321	-0.843213	0.399109	0.497272
ENSMUSG00000026198	16.121	-1.60812	1.1714	-1.37282	0.16981	0.258054
ENSMUSG00000026204	56.4181	-1.45082	0.766661	-1.89239	0.0584395	0.112184
ENSMUSG00000026226	4.84512	4.1113	2.49303	1.64912	0.0991229	0.169818
ENSMUSG00000026235	964.089	-0.523758	0.314488	-1.66543	0.0958273	0.165814
ENSMUSG00000026270	417.286	-1.09834	0.393089	-2.79412	0.00520417	0.0162664
ENSMUSG00000026273	425.213	-1.3085	0.38054	-3.43852	0.000584895	0.00269586
ENSMUSG00000026274	135.226	0.793077	0.83905	0.945208	0.344553	0.443293
ENSMUSG00000026276	1806.06	-0.132439	0.38825	-0.341116	0.733016	0.794246
ENSMUSG00000026301	391.645	-1.53551	0.527277	-2.91216	0.00358941	0.0120376
ENSMUSG00000026308	65.0067	-0.644664	1.23809	-0.520694	0.60258	0.682861
ENSMUSG00000026309	1318.22	-0.0835699	0.42155	-0.198244	0.842854	0.882919
ENSMUSG00000026313	751.677	0.256458	0.506194	0.50664	0.612407	0.692055
ENSMUSG00000026353	3563.08	0.759921	0.303432	2.50442	0.0122652	0.0323039
ENSMUSG00000026358	37.9152	4.37681	1.52338	2.8731	0.00406471	0.0133
ENSMUSG00000026374	4399.74	-0.252895	0.313453	-0.806803	0.41978	0.517178
ENSMUSG00000026385	7819.04	2.67797	0.35082	7.63347	2.28515e-14	3.52952e-12
ENSMUSG00000026395	63.3959	5.91255	1.20332	4.91352	8.94545e-07	1.26786e-05
ENSMUSG00000026417	16.4892	1.49753	2.12849	0.703567	0.481703	0.576836
ENSMUSG00000026434	3571.45	0.808499	0.350344	2.30773	0.0210142	0.0493365
ENSMUSG00000026452	638.668	-1.35901	0.395638	-3.43499	0.000592578	0.00271285
ENSMUSG00000026456	1316.98	-1.13612	0.459356	-2.47328	0.0133879	0.0346085
ENSMUSG00000026458	132.345	-1.65407	0.686825	-2.40828	0.0160277	0.0395466
ENSMUSG00000026463	355.206	-0.235592	0.414384	-0.568535	0.569672	0.655592
ENSMUSG00000026482	1050.07	-1.06628	0.453513	-2.35115	0.0187157	0.044898
ENSMUSG00000026490	898.943	-0.796836	0.327034	-2.43656	0.0148278	0.0375816
ENSMUSG00000026504	323.382	-0.638329	0.471013	-1.35523	0.175346	0.264365
ENSMUSG00000026514	136.889	-1.87393	0.715214	-2.6201	0.00879033	0.0249698
ENSMUSG00000026546	1070.65	-1.52419	0.334403	-4.55794	5.1658e-06	5.53457e-05
ENSMUSG00000026565	283.04	-0.469193	0.55595	-0.843947	0.398699	0.496937
ENSMUSG00000026576	9172.1	-1.87139	0.40182	-4.65729	3.20394e-06	3.76592e-05
ENSMUSG00000026578	1202.35	-1.40394	0.347626	-4.03863	5.3764e-05	0.000390504
ENSMUSG00000026585	2208.2	-1.12829	0.34096	-3.30917	0.000935718	0.00400298
ENSMUSG00000026587	158.836	-0.0708464	0.473706	-0.149558	0.881113	0.912157
ENSMUSG00000026596	891.051	-0.0695102	0.351629	-0.19768	0.843295	0.882919
ENSMUSG00000026605	18.5238	-0.753393	1.37888	-0.54638	0.584805	0.667298
ENSMUSG00000026609	328.031	-3.18141	0.529249	-6.01118	1.84181e-09	7.38727e-08
ENSMUSG00000026611	175.268	-1.01882	0.626237	-1.62689	0.10376	0.176184
ENSMUSG00000026622	2320.4	-1.5608	0.387682	-4.02597	5.67405e-05	0.000407275
ENSMUSG00000026632	141.256	-0.296515	0.597146	-0.496554	0.619504	0.699204
ENSMUSG00000026640	792.03	-0.806732	0.39084	-2.06409	0.0390087	0.0813783
ENSMUSG00000026643	516.281	1.56776	0.436373	3.59272	0.000327249	0.0016745
ENSMUSG00000026644	10131.1	-1.08697	0.493718	-2.2016	0.0276938	0.0613691
ENSMUSG00000026649	3059.32	-0.775264	0.468109	-1.65616	0.0976891	0.168235
ENSMUSG00000026650	615.582	-0.738779	0.489459	-1.50938	0.131202	0.210852
ENSMUSG00000026656	73.9436	7.09614	1.23992	5.72309	1.04606e-08	3.21975e-07
ENSMUSG00000026664	1372.7	-0.306194	0.359993	-0.850554	0.395017	0.493704
ENSMUSG00000026675	6398.7	-1.26558	0.340847	-3.71304	0.000204783	0.00114957
ENSMUSG00000026679	1485.32	-0.976122	0.323712	-3.0154	0.0025664	0.00913838
ENSMUSG00000026688	4462.93	0.300793	0.382852	0.785664	0.432064	0.528547
ENSMUSG00000026712	34.256	5.93945	1.52053	3.90618	9.37668e-05	0.000619202
ENSMUSG00000026743	1037.07	0.308313	0.364136	0.846697	0.397164	0.495364
ENSMUSG00000026754	822.562	-0.847933	0.330266	-2.56743	0.0102456	0.0280212
ENSMUSG00000026803	360.41	0.013578	0.39346	0.0345091	0.972471	0.97894
ENSMUSG00000026805	150.314	-1.63566	0.467766	-3.49675	0.000470957	0.00225662
ENSMUSG00000026807	272.544	-1.74	0.548375	-3.17301	0.00150868	0.0059951
ENSMUSG00000026817	1440.19	-0.926899	0.347077	-2.67058	0.00757196	0.0220187
ENSMUSG00000026825	1632.95	-1.71724	0.318123	-5.39803	6.73755e-08	1.47414e-06
ENSMUSG00000026831	689.937	-1.09343	0.491529	-2.22454	0.0261123	0.0586155
ENSMUSG00000026832	10.1807	6.64608	3.40631	1.95111	0.0510442	0.101197
ENSMUSG00000026849	844.817	-0.342363	0.493817	-0.693299	0.488122	0.58222
ENSMUSG00000026883	794.891	1.28486	0.480554	2.67372	0.0075016	0.0218491
ENSMUSG00000026894	354.549	-1.21247	0.501225	-2.41901	0.0155627	0.0387947
ENSMUSG00000026918	2002.64	0.293431	0.320548	0.915405	0.359979	0.458431
ENSMUSG00000026934	2302.52	-1.91235	0.374196	-5.11055	3.2122e-07	5.58216e-06
ENSMUSG00000026958	410.936	-1.60967	0.353565	-4.55269	5.29643e-06	5.65783e-05
ENSMUSG00000026980	463.676	-2.47524	0.575578	-4.30044	1.70456e-05	0.000155162
ENSMUSG00000026987	1341.62	-0.382714	0.456124	-0.839056	0.401438	0.499152
ENSMUSG00000026991	1799.96	0.551301	0.311561	1.76948	0.0768141	0.13929
ENSMUSG00000027012	2411.38	1.31706	0.411917	3.1974	0.00138671	0.00558372
ENSMUSG00000027018	1320.06	-0.920936	0.387419	-2.3771	0.0174491	0.0424199
ENSMUSG00000027022	4839.31	-0.9877	0.356295	-2.77214	0.00556897	0.0171702
ENSMUSG00000027075	359.147	-2.28968	0.453173	-5.05256	4.35923e-07	7.06818e-06
ENSMUSG00000027091	2345.16	0.645613	0.371789	1.73651	0.0824743	0.146563
ENSMUSG00000027107	1262.16	-2.41633	0.506925	-4.76663	1.87332e-06	2.41273e-05
ENSMUSG00000027133	3985.79	1.01121	0.330776	3.05707	0.00223512	0.00820824
ENSMUSG00000027160	877.605	0.784326	0.376418	2.08366	0.0371913	0.0781705
ENSMUSG00000027173	299.046	-1.62626	0.577246	-2.81727	0.0048434	0.0153367
ENSMUSG00000027176	625.308	-0.142105	0.385026	-0.369079	0.712069	0.777347
ENSMUSG00000027200	1162.5	-1.45234	0.40947	-3.54688	0.000389823	0.00195828
ENSMUSG00000027220	742.828	-1.94834	0.366164	-5.32096	1.03223e-07	2.05993e-06
ENSMUSG00000027242	52.11	2.2799	0.759921	3.00018	0.00269819	0.00956082
ENSMUSG00000027245	441.176	0.995507	0.349622	2.84738	0.00440805	0.0141933
ENSMUSG00000027254	101.65	-0.225789	0.883269	-0.255628	0.798238	0.847128
ENSMUSG00000027273	781.652	-1.46586	0.524895	-2.79268	0.00522739	0.0163109
ENSMUSG00000027281	169.378	0.414082	0.540457	0.76617	0.443575	0.540521
ENSMUSG00000027297	211.546	-1.89376	0.427077	-4.43423	9.2403e-06	9.21999e-05
ENSMUSG00000027304	1637.87	1.14458	0.393976	2.90522	0.00367	0.0122513
ENSMUSG00000027312	869.97	-0.582196	0.389793	-1.4936	0.135279	0.215971
ENSMUSG00000027314	106.017	-1.11114	0.651126	-1.70649	0.0879175	0.154708
ENSMUSG00000027317	55.2871	0.688625	0.973491	0.707377	0.479332	0.575135
ENSMUSG00000027329	610.784	-0.654741	0.519131	-1.26123	0.207228	0.30034
ENSMUSG00000027340	1340.81	-1.66004	0.319336	-5.19841	2.01005e-07	3.78264e-06
ENSMUSG00000027344	116.784	-2.28075	0.540679	-4.21832	2.46133e-05	0.000206934
ENSMUSG00000027349	958.763	1.16947	0.336486	3.47553	0.000509846	0.00239865
ENSMUSG00000027350	565.122	-2.09306	0.634142	-3.30062	0.0009647	0.00410761
ENSMUSG00000027358	2616.17	-1.57639	0.430747	-3.65966	0.000252547	0.00136293
ENSMUSG00000027364	126.019	2.12362	0.569763	3.72721	0.000193615	0.00110048
ENSMUSG00000027387	352.237	-0.782572	0.391437	-1.99923	0.0455838	0.0922855
ENSMUSG00000027403	4.87195	2.06967	2.28963	0.903932	0.366032	0.464023
ENSMUSG00000027404	8727.02	0.51579	0.325127	1.58643	0.112643	0.188014
ENSMUSG00000027422	3811.41	1.7062	0.459258	3.71512	0.000203106	0.00114278
ENSMUSG00000027430	1214.84	-0.285032	0.428403	-0.665338	0.505835	0.597356
ENSMUSG00000027469	54.3472	-1.92492	0.794314	-2.42338	0.0153769	0.0384105
ENSMUSG00000027484	278.932	-0.716048	0.659584	-1.08561	0.277654	0.373081
ENSMUSG00000027520	108.779	1.54908	0.975003	1.58879	0.112107	0.187292
ENSMUSG00000027550	316.759	-0.54398	0.486364	-1.11846	0.263369	0.359278
ENSMUSG00000027581	1232.71	-1.16545	0.33264	-3.50364	0.000458944	0.00223218
ENSMUSG00000027582	498.702	-0.832213	0.500838	-1.66164	0.0965847	0.166728
ENSMUSG00000027603	327.644	-1.01892	0.435477	-2.33977	0.0192956	0.0460459
ENSMUSG00000027605	3030.39	-2.25151	0.33062	-6.80996	9.7623e-12	9.28331e-10
ENSMUSG00000027606	906.429	-1.42915	0.360898	-3.95998	7.49553e-05	0.00051658
ENSMUSG00000027620	5916.47	0.331725	0.363413	0.912805	0.361345	0.459416
ENSMUSG00000027663	910.538	-0.378329	0.304619	-1.24198	0.214245	0.307687
ENSMUSG00000027676	318.428	-1.39728	0.425316	-3.28527	0.00101885	0.00430786
ENSMUSG00000027677	776.711	-0.516755	0.373042	-1.38525	0.165977	0.253464
ENSMUSG00000027680	1200.83	0.676823	0.363785	1.8605	0.0628146	0.119072
ENSMUSG00000027698	2987.86	-1.0107	0.412711	-2.44892	0.0143286	0.036546
ENSMUSG00000027702	218.242	-1.08711	0.596529	-1.82239	0.0683963	0.127392
ENSMUSG00000027706	5890.32	0.945152	0.334874	2.82241	0.00476645	0.0151591
ENSMUSG00000027713	64.3678	-0.0128612	0.73215	-0.0175664	0.985985	0.988306
ENSMUSG00000027737	914.876	-2.57795	0.405075	-6.36414	1.96391e-10	1.11452e-08
ENSMUSG00000027775	1706.06	-1.11895	0.321493	-3.48047	0.00050053	0.00236103
ENSMUSG00000027778	795.517	-1.30407	0.353036	-3.69388	0.000220862	0.00122656
ENSMUSG00000027799	562.828	-0.218994	0.322343	-0.679381	0.496897	0.590553
ENSMUSG00000027804	1481.42	-0.479502	0.382203	-1.25457	0.209634	0.302259
ENSMUSG00000027827	2172.15	-1.75951	0.41261	-4.26435	2.00489e-05	0.000176742
ENSMUSG00000027829	1449.72	0.0951343	0.395656	0.240447	0.809984	0.856188
ENSMUSG00000027834	216.488	-2.27755	0.440027	-5.17593	2.26777e-07	4.22386e-06
ENSMUSG00000027848	1296.67	-1.93995	0.369759	-5.24652	1.54997e-07	2.99442e-06
ENSMUSG00000027864	383.964	0.268118	0.432422	0.620037	0.535233	0.623466
ENSMUSG00000027881	1345.5	0.90742	0.350812	2.58663	0.00969198	0.0268098
ENSMUSG00000027887	518.349	-1.70189	0.424257	-4.01145	6.03473e-05	0.000429768
ENSMUSG00000027935	1881.52	0.480813	0.331891	1.44871	0.14742	0.231586
ENSMUSG00000027939	25.8232	-1.4848	1.5696	-0.945973	0.344162	0.443105
ENSMUSG00000027942	3707.09	-0.60474	0.365658	-1.65384	0.09816	0.168805
ENSMUSG00000027950	351.574	-1.90182	0.526069	-3.61515	0.000300171	0.00156641
ENSMUSG00000027952	1051.31	-0.641828	0.439143	-1.46155	0.143865	0.226886
ENSMUSG00000027953	888.799	0.00553348	0.318289	0.0173851	0.986129	0.988306
ENSMUSG00000027963	1130.51	-1.63462	0.367233	-4.45119	8.53969e-06	8.6605e-05
ENSMUSG00000027966	468.862	1.35613	0.540174	2.51055	0.0120544	0.0318876
ENSMUSG00000027968	1043.27	1.15403	0.366675	3.14727	0.001648	0.00639482
ENSMUSG00000027983	94.6979	-1.57218	0.753836	-2.08558	0.0370171	0.0778946
ENSMUSG00000027994	464.113	-1.23383	0.743984	-1.6584	0.0972361	0.167693
ENSMUSG00000028053	1697.21	0.502081	0.327871	1.53134	0.125686	0.203974
ENSMUSG00000028062	2341.46	1.37741	0.303449	4.53918	5.64739e-06	5.99746e-05
ENSMUSG00000028080	1107.53	-0.708909	0.367939	-1.9267	0.0540166	0.105991
ENSMUSG00000028086	2580.85	-0.431087	0.287657	-1.49862	0.133973	0.214169
ENSMUSG00000028104	424.611	-0.542589	0.450549	-1.20428	0.22848	0.321643
ENSMUSG00000028106	801.135	0.0104439	0.353206	0.0295688	0.976411	0.9817
ENSMUSG00000028133	316.362	-1.07469	0.419177	-2.56381	0.0103532	0.0281943
ENSMUSG00000028136	1257.38	-0.0338033	0.364842	-0.092652	0.92618	0.949446
ENSMUSG00000028139	20.5441	-1.05611	1.24284	-0.849757	0.39546	0.494087
ENSMUSG00000028141	16.6624	1.19305	1.34863	0.884639	0.376351	0.474945
ENSMUSG00000028158	279.555	-1.22352	0.452049	-2.70661	0.00679734	0.0201534
ENSMUSG00000028222	323.512	-1.95328	0.398484	-4.90178	9.49738e-07	1.33183e-05
ENSMUSG00000028229	257.561	-0.0321067	0.42032	-0.0763864	0.939112	0.958105
ENSMUSG00000028233	1195.58	-0.549473	0.38111	-1.44177	0.149368	0.233876
ENSMUSG00000028248	1210.55	-0.154942	0.361183	-0.428984	0.667935	0.740293
ENSMUSG00000028251	105.349	-0.958305	0.598168	-1.60207	0.109141	0.183689
ENSMUSG00000028256	379.263	-0.654538	0.592725	-1.10429	0.269469	0.365328
ENSMUSG00000028266	1580.38	-0.253389	0.306778	-0.825969	0.408822	0.505564
ENSMUSG00000028292	400.896	-0.998781	0.449232	-2.22331	0.0261949	0.058692
ENSMUSG00000028294	1159.46	-1.95936	0.328441	-5.96563	2.43686e-09	9.21947e-08
ENSMUSG00000028295	626.024	-0.587755	0.371816	-1.58077	0.113931	0.189554
ENSMUSG00000028300	939.571	-0.506153	0.422936	-1.19676	0.2314	0.32466
ENSMUSG00000028329	1126.77	-0.428736	0.364938	-1.17482	0.240068	0.334071
ENSMUSG00000028331	189.769	-0.869578	0.424459	-2.04867	0.040494	0.0840024
ENSMUSG00000028358	101.698	0.909674	0.661353	1.37547	0.168984	0.257015
ENSMUSG00000028391	462.446	-1.02434	0.40711	-2.51612	0.0118655	0.0315026
ENSMUSG00000028398	859.287	0.552789	0.397334	1.39125	0.164151	0.251579
ENSMUSG00000028407	267.813	1.04634	0.505309	2.07069	0.0383882	0.0803145
ENSMUSG00000028441	4372.62	-0.668479	0.436056	-1.53301	0.125273	0.203849
ENSMUSG00000028447	8056.86	-0.549557	0.359114	-1.53031	0.125939	0.204293
ENSMUSG00000028461	1936.12	0.320608	0.282317	1.13563	0.256111	0.351149
ENSMUSG00000028468	532.107	0.116809	0.500201	0.233524	0.815355	0.860863
ENSMUSG00000028470	1794.62	0.779598	0.342496	2.27623	0.0228325	0.0528876
ENSMUSG00000028478	3943.97	0.284553	0.274073	1.03824	0.29916	0.395828
ENSMUSG00000028484	3049.72	-0.360676	0.315155	-1.14444	0.252442	0.34743
ENSMUSG00000028496	1486.17	0.438814	0.317506	1.38206	0.166953	0.254573
ENSMUSG00000028514	572.395	0.122829	0.340949	0.360256	0.718656	0.782222
ENSMUSG00000028524	184.573	-0.718027	0.538157	-1.33423	0.182128	0.272105
ENSMUSG00000028546	32.6773	-2.76047	1.39378	-1.98057	0.0476395	0.0958065
ENSMUSG00000028565	2202.07	0.725386	0.376043	1.929	0.0537312	0.105602
ENSMUSG00000028576	2506.39	-1.05583	0.355848	-2.96707	0.00300648	0.0104294
ENSMUSG00000028589	964.405	-1.22976	0.501196	-2.45365	0.0141413	0.0361443
ENSMUSG00000028609	1120.65	1.30097	0.331117	3.92904	8.52873e-05	0.00057152
ENSMUSG00000028610	171.524	-2.16028	0.60564	-3.56694	0.000361179	0.00183469
ENSMUSG00000028617	1107.15	-0.805941	0.356717	-2.25933	0.0238628	0.0546468
ENSMUSG00000028618	12425.2	-0.725004	0.430564	-1.68384	0.0922118	0.160784
ENSMUSG00000028637	939.477	-1.03892	0.397454	-2.61395	0.00895025	0.0252582
ENSMUSG00000028648	2700.74	1.12205	0.327504	3.42606	0.000612408	0.0027873
ENSMUSG00000028649	1655.8	-0.494222	0.416572	-1.1864	0.235463	0.329177
ENSMUSG00000028677	2405.92	-0.278966	0.324607	-0.859398	0.390121	0.488425
ENSMUSG00000028702	32.4017	-1.40494	0.9937	-1.41385	0.157407	0.243381
ENSMUSG00000028710	255.094	-0.81872	0.407678	-2.00825	0.0446163	0.0907316
ENSMUSG00000028730	135.041	-1.16105	0.569976	-2.03701	0.0416487	0.0859478
ENSMUSG00000028771	438.429	1.28172	0.38548	3.32499	0.000884224	0.00382322
ENSMUSG00000028773	74.8488	-0.0707725	0.716339	-0.0987975	0.921299	0.945777
ENSMUSG00000028782	394.313	-1.67784	0.734097	-2.28559	0.0222785	0.0518357
ENSMUSG00000028794	21.6952	1.97928	4.1821	0.473275	0.636017	0.711755
ENSMUSG00000028803	846.431	-1.24999	0.493662	-2.53209	0.0113386	0.0303436
ENSMUSG00000028804	14.3695	-0.629144	2.04266	-0.308002	0.758081	0.813911
ENSMUSG00000028809	3393.65	0.367371	0.386061	0.951586	0.341307	0.440104
ENSMUSG00000028820	1553.2	0.0788664	0.443865	0.177681	0.858974	0.896235
ENSMUSG00000028845	862.593	-1.10742	0.461895	-2.39755	0.0165051	0.0405593
ENSMUSG00000028863	956.266	-0.703435	0.327949	-2.14495	0.0319565	0.0691693
ENSMUSG00000028865	16690.1	-1.45914	0.416827	-3.50058	0.000464248	0.00223924
ENSMUSG00000028901	172.787	0.76625	0.784301	0.976985	0.328576	0.428199
ENSMUSG00000028917	491.191	0.995826	0.449838	2.21375	0.0268463	0.0597096
ENSMUSG00000028936	1606.66	1.25336	0.330754	3.78942	0.000151	0.000906214
ENSMUSG00000028943	19688.9	-1.20666	0.388494	-3.106	0.00189634	0.00718198
ENSMUSG00000028950	188.937	-2.01004	0.649803	-3.0933	0.00197943	0.00743464
ENSMUSG00000028952	201.367	-1.0276	0.433907	-2.36826	0.0178718	0.0432739
ENSMUSG00000028957	676.207	0.0334052	0.399586	0.0835996	0.933375	0.954003
ENSMUSG00000028964	6055.74	1.05508	0.271846	3.88118	0.000103951	0.000672993
ENSMUSG00000028974	240.218	-1.09182	0.478091	-2.28371	0.0223886	0.0520252
ENSMUSG00000028977	790.852	-0.67884	0.450596	-1.50654	0.131929	0.211728
ENSMUSG00000028978	205.175	-0.109891	0.43798	-0.250903	0.801889	0.850105
ENSMUSG00000028996	351.186	3.94669	0.559559	7.05322	1.74824e-12	2.11653e-10
ENSMUSG00000028998	3414.33	0.72791	0.406101	1.79244	0.0730629	0.133823
ENSMUSG00000029004	3621.9	-0.156223	0.319452	-0.489035	0.624817	0.703016
ENSMUSG00000029022	113.37	0.0435354	0.619814	0.0702394	0.944003	0.960398
ENSMUSG00000029027	67.4195	-2.87466	1.38194	-2.08017	0.03751	0.0787039
ENSMUSG00000029049	836.669	-1.2774	0.378149	-3.37805	0.00073002	0.00322951
ENSMUSG00000029059	809.325	-0.13023	0.318311	-0.409127	0.682446	0.752016
ENSMUSG00000029061	81.1786	-4.43508	1.06199	-4.17618	2.96444e-05	0.000239796
ENSMUSG00000029062	2504.99	1.10159	0.393829	2.79713	0.00515585	0.0161571
ENSMUSG00000029068	1203.48	-0.322385	0.400932	-0.804087	0.421347	0.518756
ENSMUSG00000029094	912.901	-1.445	0.387329	-3.73068	0.000190962	0.00108881
ENSMUSG00000029095	1492.77	-1.9479	0.37688	-5.16849	2.35997e-07	4.37317e-06
ENSMUSG00000029102	12.6816	1.80175	1.95675	0.920787	0.357162	0.455482
ENSMUSG00000029108	822.687	-1.17798	0.404175	-2.91453	0.0035622	0.0119685
ENSMUSG00000029126	1187.49	-2.07595	0.447311	-4.64096	3.46799e-06	4.01139e-05
ENSMUSG00000029131	2777.6	-0.905441	0.420148	-2.15505	0.0311576	0.067741
ENSMUSG00000029149	579.052	0.541739	0.394983	1.37155	0.170204	0.258544
ENSMUSG00000029177	54.9337	2.02351	0.903811	2.23886	0.025165	0.057004
ENSMUSG00000029182	1226.25	-1.08359	0.476513	-2.27401	0.0229656	0.0530605
ENSMUSG00000029205	4412.24	-2.50277	0.503823	-4.96756	6.78013e-07	1.00227e-05
ENSMUSG00000029208	347.579	-0.98966	0.390241	-2.53602	0.0112119	0.0300751
ENSMUSG00000029231	409.915	0.0703979	0.441852	0.159325	0.873413	0.905836
ENSMUSG00000029245	99.0867	1.63156	0.815625	2.00038	0.0454592	0.092136
ENSMUSG00000029254	33.7157	8.3774	1.90396	4.39998	1.08263e-05	0.000104024
ENSMUSG00000029275	3124.35	-1.84042	0.403101	-4.56566	4.97921e-06	5.41847e-05
ENSMUSG00000029276	184.611	-1.22275	0.663837	-1.84194	0.065484	0.123287
ENSMUSG00000029283	207.154	-0.986872	0.665587	-1.48271	0.138152	0.219304
ENSMUSG00000029290	1191.02	0.988166	0.349213	2.82969	0.00465924	0.0148572
ENSMUSG00000029304	168858	-1.6599	0.51393	-3.22981	0.00123871	0.00508362
ENSMUSG00000029328	3068.46	-0.453719	0.349304	-1.29892	0.193971	0.285802
ENSMUSG00000029335	247.869	-1.66773	0.439697	-3.79291	0.00014889	0.000897888
ENSMUSG00000029337	237.861	0.0441183	0.528034	0.0835519	0.933413	0.954003
ENSMUSG00000029352	28.2719	1.31573	1.22122	1.07739	0.281306	0.377553
ENSMUSG00000029373	1055.84	5.97931	0.618401	9.66898	4.08438e-22	1.85431e-19
ENSMUSG00000029389	460.172	0.111644	0.459821	0.2428	0.80816	0.854758
ENSMUSG00000029404	1795.18	0.76079	0.318223	2.39074	0.0168144	0.0410968
ENSMUSG00000029406	117.578	1.31194	0.564357	2.32467	0.0200896	0.0476898
ENSMUSG00000029413	314.66	-3.11054	0.456965	-6.80696	9.96832e-12	9.28331e-10
ENSMUSG00000029420	331.057	-1.39441	0.632766	-2.20367	0.0275474	0.0610819
ENSMUSG00000029422	2047.29	0.440206	0.358995	1.22622	0.220117	0.313885
ENSMUSG00000029433	3153.75	-0.898082	0.418976	-2.14352	0.0320715	0.0693645
ENSMUSG00000029438	823.775	-0.938721	0.384254	-2.44297	0.014567	0.0370241
ENSMUSG00000029439	569.972	0.737194	0.422317	1.74559	0.0808815	0.144389
ENSMUSG00000029442	597.625	-1.05342	0.374196	-2.81516	0.00487536	0.0154111
ENSMUSG00000029463	566.425	-0.811286	0.504648	-1.60763	0.107917	0.181962
ENSMUSG00000029469	1339.17	-1.08602	0.28904	-3.75735	0.000171724	0.00100597
ENSMUSG00000029482	1256.72	-1.0631	0.335865	-3.16526	0.00154946	0.00612364
ENSMUSG00000029516	35.8449	1.53469	1.06431	1.44196	0.149315	0.233876
ENSMUSG00000029524	111.902	-0.567185	0.558326	-1.01587	0.309693	0.407242
ENSMUSG00000029544	208.506	-1.07161	0.462869	-2.31515	0.0206045	0.048563
ENSMUSG00000029551	368.389	0.768524	0.428762	1.79243	0.0730647	0.133823
ENSMUSG00000029559	1481.23	0.461733	0.360781	1.27981	0.20061	0.29356
ENSMUSG00000029601	195.437	-1.83291	0.507785	-3.60961	0.000306654	0.00158883
ENSMUSG00000029605	123.342	-0.0431872	0.639089	-0.0675761	0.946123	0.96186
ENSMUSG00000029608	31.0507	-3.73587	1.06593	-3.50479	0.00045697	0.00223072
ENSMUSG00000029614	4056.11	1.85408	0.387878	4.78005	1.75248e-06	2.26513e-05
ENSMUSG00000029616	1783.41	-0.13518	0.295802	-0.456993	0.647676	0.72236
ENSMUSG00000029618	1198.72	-1.53881	0.492451	-3.1248	0.00177928	0.00678817
ENSMUSG00000029623	2854.56	2.03655	0.310491	6.55914	5.41198e-11	3.85418e-09
ENSMUSG00000029627	248.14	-1.7947	0.427519	-4.19794	2.6935e-05	0.000222336
ENSMUSG00000029629	917.848	-0.0583673	0.341554	-0.170888	0.864312	0.899995
ENSMUSG00000029632	9260.87	0.611656	0.275969	2.2164	0.0266644	0.0594507
ENSMUSG00000029647	332.349	0.524031	0.488322	1.07313	0.283215	0.37957
ENSMUSG00000029657	2942.25	-1.04706	0.331338	-3.16011	0.0015771	0.00617912
ENSMUSG00000029658	94.0726	-1.54468	0.540488	-2.85794	0.00426397	0.0138151
ENSMUSG00000029660	122.958	-2.01059	0.693419	-2.89954	0.00373715	0.0124412
ENSMUSG00000029671	33.4409	-2.65469	0.953864	-2.78309	0.00538434	0.0166717
ENSMUSG00000029673	691.458	0.531843	0.440411	1.20761	0.227199	0.320336
ENSMUSG00000029701	1154.27	0.261627	0.374496	0.698611	0.484795	0.579012
ENSMUSG00000029712	133.895	-1.60531	0.64334	-2.49527	0.0125862	0.0330058
ENSMUSG00000029714	373.354	-0.066593	0.489651	-0.136001	0.89182	0.920458
ENSMUSG00000029715	985.771	0.57442	0.344636	1.66674	0.095566	0.165599
ENSMUSG00000029725	459.573	0.539772	0.401261	1.34519	0.178564	0.267989
ENSMUSG00000029726	846.335	0.0712141	0.333058	0.213819	0.830688	0.872739
ENSMUSG00000029754	84.4728	1.3541	0.845195	1.60212	0.10913	0.183689
ENSMUSG00000029765	3352.4	-1.92072	0.306817	-6.26014	3.84629e-10	1.91366e-08
ENSMUSG00000029817	1167.72	0.573867	0.385198	1.4898	0.136278	0.216993
ENSMUSG00000029823	1038.57	0.828843	0.375904	2.20493	0.0274589	0.0609228
ENSMUSG00000029829	16.4297	-2.15132	1.1824	-1.81946	0.0688416	0.127971
ENSMUSG00000029836	524.106	0.555562	0.438915	1.26576	0.205598	0.298812
ENSMUSG00000029864	470.528	-0.305439	0.41279	-0.739939	0.459337	0.55597
ENSMUSG00000030030	403.873	-1.25057	0.43597	-2.86848	0.00412446	0.0134591
ENSMUSG00000030032	926.995	-1.10418	0.438042	-2.52072	0.0117114	0.0311541
ENSMUSG00000030034	635.099	1.01408	0.394021	2.57368	0.0100624	0.0276242
ENSMUSG00000030051	234.85	0.798485	0.452923	1.76296	0.0779074	0.140601
ENSMUSG00000030059	3081.12	-0.583505	0.280972	-2.07674	0.037826	0.0792294
ENSMUSG00000030060	805.342	-0.232071	0.36353	-0.638383	0.523225	0.612424
ENSMUSG00000030074	450.72	-2.10469	0.412625	-5.10075	3.38317e-07	5.76887e-06
ENSMUSG00000030075	86.627	-1.44432	0.767663	-1.88145	0.0599105	0.114343
ENSMUSG00000030079	965.147	-0.676497	0.354412	-1.90879	0.0562897	0.10927
ENSMUSG00000030083	288.291	-1.40708	0.458042	-3.07195	0.00212669	0.00787462
ENSMUSG00000030086	2352.1	-0.621013	0.388779	-1.59734	0.110189	0.184768
ENSMUSG00000030122	1069.07	2.08114	0.584694	3.55937	0.000371742	0.00187784
ENSMUSG00000030125	200.024	-1.08596	0.487027	-2.22977	0.0257625	0.0580096
ENSMUSG00000030126	410.928	1.16077	0.480673	2.41488	0.0157404	0.0390405
ENSMUSG00000030144	80.9418	4.88227	1.08883	4.48395	7.32723e-06	7.60357e-05
ENSMUSG00000030157	50.6912	2.72593	1.06979	2.5481	0.0108311	0.0292697
ENSMUSG00000030180	1799.45	0.0157719	0.349693	0.045102	0.964026	0.973669
ENSMUSG00000030188	304.811	1.13455	0.438603	2.58673	0.00968904	0.0268098
ENSMUSG00000030203	634.996	-0.0157496	0.354406	-0.0444392	0.964554	0.973669
ENSMUSG00000030207	1870.16	-2.06592	0.30174	-6.84668	7.55829e-12	7.55162e-10
ENSMUSG00000030246	12600.9	-0.212583	0.319692	-0.664962	0.506075	0.597356
ENSMUSG00000030256	856.478	2.08898	0.37626	5.55196	2.82489e-08	7.38129e-07
ENSMUSG00000030257	719.026	1.04017	0.348966	2.98071	0.00287577	0.0100397
ENSMUSG00000030270	747.289	-0.450025	0.546086	-0.824091	0.409888	0.506709
ENSMUSG00000030276	834.756	-1.76673	0.31993	-5.52226	3.34667e-08	8.32541e-07
ENSMUSG00000030284	755.838	-0.942698	0.381054	-2.47392	0.0133639	0.0345711
ENSMUSG00000030302	4507.08	-1.3013	0.356711	-3.64804	0.000264245	0.00141554
ENSMUSG00000030306	183.76	-1.70855	0.490234	-3.48518	0.00049181	0.00233497
ENSMUSG00000030324	30.4936	-2.11958	1.07162	-1.97792	0.0479378	0.0963532
ENSMUSG00000030330	25.5522	0.904195	1.87584	0.482021	0.629791	0.707298
ENSMUSG00000030336	24.0847	2.16261	1.02469	2.1105	0.0348155	0.0740409
ENSMUSG00000030376	191.034	-1.5371	0.532413	-2.88705	0.00388872	0.0128867
ENSMUSG00000030401	649.963	-1.69938	0.5185	-3.27749	0.00104734	0.00440782
ENSMUSG00000030432	3000.98	1.84308	0.512705	3.59482	0.000324613	0.00166996
ENSMUSG00000030451	1330.21	0.39823	0.542723	0.733763	0.463093	0.559532
ENSMUSG00000030519	77.4022	-0.982391	0.781819	-1.25655	0.208918	0.301758
ENSMUSG00000030538	3051.51	1.51133	0.287789	5.25151	1.50854e-07	2.9368e-06
ENSMUSG00000030539	641.039	0.198819	0.379717	0.523598	0.600558	0.68142
ENSMUSG00000030551	318.994	2.64107	0.46216	5.71461	1.09954e-08	3.30043e-07
ENSMUSG00000030579	493.874	5.899	1.49739	3.93951	8.16469e-05	0.000554283
ENSMUSG00000030587	530.03	2.58397	0.412712	6.26096	3.82617e-10	1.91366e-08
ENSMUSG00000030638	212.761	-1.6672	0.526233	-3.16817	0.00153401	0.00607582
ENSMUSG00000030647	3800.77	0.365652	0.29881	1.2237	0.221067	0.314745
ENSMUSG00000030654	7518.95	-0.637714	0.344678	-1.85017	0.0642887	0.121487
ENSMUSG00000030655	666.68	0.784962	0.507916	1.54546	0.122236	0.199803
ENSMUSG00000030669	565.798	-2.20774	0.627729	-3.51703	0.000436409	0.00215651
ENSMUSG00000030683	96.3321	-2.93147	0.688895	-4.25532	2.0875e-05	0.000182255
ENSMUSG00000030707	98.3763	4.94351	0.889023	5.56061	2.68838e-08	7.12714e-07
ENSMUSG00000030708	1700.6	-1.55748	0.563382	-2.76452	0.00570066	0.0174446
ENSMUSG00000030711	13.344	-4.80055	1.75067	-2.74212	0.00610432	0.018445
ENSMUSG00000030729	4917.33	-1.0987	0.357319	-3.07486	0.00210603	0.00781318
ENSMUSG00000030738	4391.15	1.54719	0.380893	4.06201	4.86529e-05	0.000359893
ENSMUSG00000030741	1014.64	-0.503045	0.385803	-1.30389	0.192271	0.283755
ENSMUSG00000030742	9.14215	0.840416	2.08808	0.402483	0.687329	0.756937
ENSMUSG00000030757	94.0542	-0.729747	0.802878	-0.908914	0.363396	0.46144
ENSMUSG00000030779	1767.21	-0.367707	0.341491	-1.07677	0.281583	0.377662
ENSMUSG00000030782	500.194	-0.672245	0.50235	-1.3382	0.180832	0.270391
ENSMUSG00000030786	70.0252	5.89519	1.14715	5.13898	2.76236e-07	4.96679e-06
ENSMUSG00000030789	15.5501	7.26702	2.72098	2.67074	0.00756849	0.0220187
ENSMUSG00000030811	113.184	0.817065	0.743422	1.09906	0.271742	0.367551
ENSMUSG00000030825	1047.7	-1.45612	0.416958	-3.49225	0.000478968	0.00228896
ENSMUSG00000030827	71.6038	-1.09079	0.800624	-1.36242	0.173064	0.261576
ENSMUSG00000030844	86.4297	3.36453	0.827045	4.06814	4.73904e-05	0.000351987
ENSMUSG00000030847	2695.54	2.70262	0.445536	6.06598	1.31148e-09	5.5387e-08
ENSMUSG00000030850	3020.66	-0.691817	0.277005	-2.49749	0.0125076	0.0328472
ENSMUSG00000030867	14.6978	-6.67682	1.85771	-3.59411	0.000325497	0.00167214
ENSMUSG00000030869	2125.66	0.75614	0.291587	2.59319	0.00950904	0.0264395
ENSMUSG00000030889	195.532	-1.33083	0.550055	-2.41945	0.015544	0.0387817
ENSMUSG00000030905	412.636	-0.0340549	0.484014	-0.0703592	0.943908	0.960398
ENSMUSG00000030921	141.058	3.50728	0.747471	4.6922	2.70286e-06	3.2832e-05
ENSMUSG00000030979	388.165	-1.41834	0.356632	-3.97704	6.97778e-05	0.000489702
ENSMUSG00000030980	2363.48	0.860766	0.303063	2.84023	0.00450817	0.0144516
ENSMUSG00000030994	375.52	-0.811365	0.518996	-1.56334	0.117973	0.195118
ENSMUSG00000030996	1738.83	-2.15131	0.510752	-4.21205	2.53068e-05	0.00021033
ENSMUSG00000031007	6815.6	-1.43198	0.473926	-3.02152	0.00251509	0.00899095
ENSMUSG00000031059	4543.7	0.748089	0.300965	2.48563	0.0129322	0.0337427
ENSMUSG00000031104	152.849	-0.712455	0.875133	-0.814111	0.415581	0.512701
ENSMUSG00000031105	899.345	-0.983751	0.508655	-1.93402	0.0531101	0.104494
ENSMUSG00000031107	279.583	1.65929	0.560837	2.9586	0.00309039	0.0106695
ENSMUSG00000031109	259.623	0.0881573	0.39268	0.224502	0.822367	0.866755
ENSMUSG00000031129	371.524	-1.39962	0.545021	-2.56801	0.0102285	0.0279953
ENSMUSG00000031144	1189.12	-2.07943	0.387536	-5.36576	8.06081e-08	1.66044e-06
ENSMUSG00000031153	1010.79	-0.643276	0.488098	-1.31792	0.187529	0.278003
ENSMUSG00000031155	510.587	-1.7992	0.531741	-3.38359	0.000715435	0.00316885
ENSMUSG00000031168	1268.41	-0.604322	0.345343	-1.74992	0.0801321	0.14344
ENSMUSG00000031174	548.385	-1.2864	0.381377	-3.37303	0.000743451	0.00328493
ENSMUSG00000031202	391.606	-1.00994	0.385786	-2.61788	0.00884787	0.0250695
ENSMUSG00000031221	559.6	-0.32238	0.407986	-0.790176	0.429425	0.526802
ENSMUSG00000031229	2371.72	-0.00435975	0.475899	-0.00916108	0.992691	0.993785
ENSMUSG00000031245	835.176	1.24611	0.446949	2.78803	0.00530296	0.0164618
ENSMUSG00000031284	5663.57	-1.09072	0.302302	-3.60805	0.000308513	0.00159618
ENSMUSG00000031292	76.0117	0.656822	1.02869	0.638506	0.523144	0.612424
ENSMUSG00000031309	507.421	0.95157	0.531985	1.78872	0.0736606	0.134432
ENSMUSG00000031310	439.728	-0.654815	0.371153	-1.76427	0.0776862	0.140376
ENSMUSG00000031347	5222.57	-0.584341	0.357343	-1.63524	0.101999	0.173712
ENSMUSG00000031370	1118.77	1.22696	0.358919	3.41848	0.000629721	0.00285536
ENSMUSG00000031386	1371.33	1.15807	0.465282	2.48896	0.0128117	0.0335245
ENSMUSG00000031393	1551.35	0.307585	0.316942	0.970478	0.331808	0.431482
ENSMUSG00000031428	2381.53	-1.62283	0.383385	-4.23291	2.30689e-05	0.000196221
ENSMUSG00000031432	1071.45	-0.702937	0.431997	-1.62718	0.103699	0.176163
ENSMUSG00000031438	3414.96	-1.67262	0.451065	-3.70815	0.000208782	0.00117021
ENSMUSG00000031451	792.735	-0.951963	0.343734	-2.76947	0.0056147	0.0172526
ENSMUSG00000031458	1396.97	0.0478692	0.337587	0.141798	0.88724	0.916772
ENSMUSG00000031461	16.1571	-1.86646	1.82404	-1.02326	0.306187	0.40307
ENSMUSG00000031511	475.179	0.382775	0.530953	0.720921	0.470958	0.56738
ENSMUSG00000031521	251.084	-0.948292	0.631486	-1.50168	0.133179	0.213087
ENSMUSG00000031523	277.148	1.90613	0.471815	4.04	5.3451e-05	0.000389827
ENSMUSG00000031532	6909.61	-1.07118	0.311797	-3.43551	0.000591448	0.00271285
ENSMUSG00000031536	1190.99	-0.359857	0.375312	-0.958821	0.337649	0.436971
ENSMUSG00000031539	1896.42	-1.30625	0.327052	-3.99401	6.49662e-05	0.000461756
ENSMUSG00000031540	952.115	-0.271666	0.322269	-0.842977	0.399241	0.497272
ENSMUSG00000031543	361.608	-1.39555	0.372132	-3.75015	0.000176725	0.00102535
ENSMUSG00000031574	87.193	0.584726	0.676478	0.864367	0.387386	0.486006
ENSMUSG00000031590	2286.29	0.555527	0.359581	1.54493	0.122363	0.19992
ENSMUSG00000031592	1380.91	-0.484663	0.377187	-1.28494	0.198813	0.291282
ENSMUSG00000031633	15204.4	-0.129562	0.290482	-0.446025	0.655579	0.7286
ENSMUSG00000031654	121.802	-1.64836	0.505211	-3.26272	0.00110349	0.00458044
ENSMUSG00000031660	909.89	0.838137	0.328028	2.55508	0.0106163	0.0287964
ENSMUSG00000031688	241.795	-2.27181	0.651316	-3.48803	0.000486601	0.0023163
ENSMUSG00000031708	9510	-1.39322	0.314618	-4.42829	9.49836e-06	9.34906e-05
ENSMUSG00000031732	182.407	1.09709	0.506157	2.16749	0.0301974	0.0660982
ENSMUSG00000031737	244.616	-0.230232	0.522217	-0.440874	0.659305	0.732292
ENSMUSG00000031762	496.364	1.31771	0.541199	2.4348	0.0148998	0.0376875
ENSMUSG00000031765	11186	0.830374	0.42319	1.96218	0.0497419	0.0991561
ENSMUSG00000031781	3821.59	-0.896914	0.445628	-2.0127	0.0441466	0.089877
ENSMUSG00000031813	1683.23	0.845492	0.303183	2.78872	0.0052917	0.016455
ENSMUSG00000031818	10185.5	0.823899	0.298074	2.76407	0.00570846	0.0174521
ENSMUSG00000031831	189.904	-0.918074	0.539533	-1.70161	0.088829	0.155783
ENSMUSG00000031840	1683.03	-1.40633	0.344784	-4.07887	4.52544e-05	0.000338609
ENSMUSG00000031843	1088.08	0.770318	0.360787	2.13511	0.0327523	0.0705553
ENSMUSG00000031847	211.02	-1.52456	0.564517	-2.70064	0.00692054	0.0204686
ENSMUSG00000031848	2807.65	0.261758	0.282625	0.926167	0.354359	0.453021
ENSMUSG00000031861	48.2587	0.595459	0.856986	0.694829	0.487162	0.581266
ENSMUSG00000031878	1353.5	-1.08162	0.383372	-2.82134	0.00478235	0.015183
ENSMUSG00000031883	702.09	-1.58428	0.382588	-4.14095	3.45869e-05	0.000272494
ENSMUSG00000031893	104.913	-2.50212	0.574428	-4.35584	1.32555e-05	0.000124725
ENSMUSG00000031904	365.944	-1.19821	0.41844	-2.86352	0.00418968	0.0136108
ENSMUSG00000031921	571.359	0.104753	0.432995	0.241927	0.808837	0.855224
ENSMUSG00000031922	565.661	-0.144947	0.399892	-0.362466	0.717004	0.781091
ENSMUSG00000031934	1224.19	-1.99307	0.350922	-5.67952	1.35074e-08	3.89358e-07
ENSMUSG00000031938	783.151	2.38465	0.442351	5.39085	7.01235e-08	1.516e-06
ENSMUSG00000031939	723.279	0.751206	0.414021	1.81441	0.069614	0.128868
ENSMUSG00000031949	149.857	-0.888447	0.55272	-1.60741	0.107965	0.181962
ENSMUSG00000031950	2569.6	-0.294251	0.33661	-0.874159	0.382031	0.480283
ENSMUSG00000031954	4675.17	0.695403	0.267482	2.59982	0.00932731	0.0261193
ENSMUSG00000031957	6.63921	-2.07184	2.65354	-0.780781	0.434931	0.531339
ENSMUSG00000031962	326.975	-0.201313	0.520345	-0.386884	0.698842	0.766132
ENSMUSG00000031990	382.231	-0.291351	0.606351	-0.480498	0.630873	0.708294
ENSMUSG00000032002	1425.29	-0.0140848	0.374054	-0.0376545	0.969963	0.976957
ENSMUSG00000032009	704.081	1.23017	0.41842	2.94003	0.00328184	0.0111713
ENSMUSG00000032012	191.169	0.0238031	0.428099	0.0556018	0.955659	0.968188
ENSMUSG00000032020	2872.2	-1.10732	0.302667	-3.65855	0.000253651	0.00136686
ENSMUSG00000032021	38.9123	0.682187	1.65055	0.413308	0.679381	0.750004
ENSMUSG00000032083	16.1897	0.195416	1.70203	0.114814	0.908593	0.934053
ENSMUSG00000032101	198.639	-2.02714	0.711139	-2.85056	0.00436426	0.0140773
ENSMUSG00000032112	3167.37	0.433216	0.352777	1.22802	0.219441	0.313167
ENSMUSG00000032118	429.231	-1.27705	0.384224	-3.32371	0.000888274	0.00383616
ENSMUSG00000032121	572.239	-0.941425	0.372602	-2.52662	0.0115165	0.0307559
ENSMUSG00000032179	10.1622	-2.85114	2.31334	-1.23247	0.217772	0.311274
ENSMUSG00000032181	1581.33	-2.31831	0.45989	-5.04102	4.63065e-07	7.44183e-06
ENSMUSG00000032184	1071.4	-0.602853	0.466174	-1.29319	0.195945	0.288243
ENSMUSG00000032212	2377.92	0.366247	0.394606	0.928134	0.353338	0.452034
ENSMUSG00000032221	1124.5	-0.214569	0.593667	-0.361429	0.717779	0.781701
ENSMUSG00000032239	1412.98	0.811996	0.388545	2.08983	0.0366326	0.0773096
ENSMUSG00000032245	851.892	-1.95258	0.389666	-5.01091	5.41732e-07	8.40842e-06
ENSMUSG00000032246	9517.34	-0.866217	0.437324	-1.98072	0.0476227	0.0958065
ENSMUSG00000032249	562.261	0.589871	0.424925	1.38817	0.165084	0.252457
ENSMUSG00000032251	517.862	-1.04651	0.364211	-2.87335	0.00406139	0.0133
ENSMUSG00000032253	3116.25	-0.467606	0.304697	-1.53466	0.124867	0.20328
ENSMUSG00000032262	1618.01	-2.37829	0.461782	-5.15024	2.6015e-07	4.74807e-06
ENSMUSG00000032280	1465.96	-0.804907	0.291531	-2.76096	0.00576309	0.0175895
ENSMUSG00000032297	97.2215	-0.853625	0.737295	-1.15778	0.246954	0.34169
ENSMUSG00000032311	56.0883	-1.94758	0.964197	-2.0199	0.043394	0.0886455
ENSMUSG00000032324	9140.56	-1.18405	0.338551	-3.4974	0.000469821	0.00225415
ENSMUSG00000032327	967.911	-2.83247	0.402606	-7.03534	1.98778e-12	2.32891e-10
ENSMUSG00000032330	6464.62	1.17826	0.342661	3.43855	0.000584839	0.00269586
ENSMUSG00000032336	5252.6	-1.54016	0.37429	-4.11489	3.8736e-05	0.00029744
ENSMUSG00000032370	400.13	0.741576	0.414865	1.78751	0.0738553	0.134632
ENSMUSG00000032373	5360.01	-2.13623	0.385287	-5.5445	2.94788e-08	7.53994e-07
ENSMUSG00000032403	539.618	-0.169363	0.507165	-0.33394	0.738425	0.798915
ENSMUSG00000032407	1816.63	0.479038	0.381201	1.25665	0.208879	0.301758
ENSMUSG00000032417	107.165	-2.01783	0.587033	-3.43733	0.000587472	0.00270431
ENSMUSG00000032436	659.292	-0.802674	0.332925	-2.41098	0.0159098	0.0393627
ENSMUSG00000032492	305.963	-2.23054	0.438881	-5.08233	3.72834e-07	6.26913e-06
ENSMUSG00000032495	179.586	-1.17642	0.620107	-1.89713	0.0578109	0.111404
ENSMUSG00000032514	325.338	-1.14036	0.476161	-2.3949	0.016625	0.0407712
ENSMUSG00000032525	1044.01	0.511389	0.390969	1.308	0.190872	0.282152
ENSMUSG00000032526	2014.94	0.435113	0.317961	1.36845	0.171172	0.259798
ENSMUSG00000032551	569.327	0.0363532	0.381525	0.095284	0.924089	0.94757
ENSMUSG00000032589	134.408	-0.738957	0.665278	-1.11075	0.266677	0.362218
ENSMUSG00000032599	863.515	-0.300799	0.382772	-0.785843	0.431959	0.528547
ENSMUSG00000032607	143.75	1.24545	0.538498	2.31283	0.0207321	0.0488005
ENSMUSG00000032621	1387.88	0.402734	0.365525	1.1018	0.270551	0.36652
ENSMUSG00000032640	492.858	1.12832	0.419724	2.68824	0.00718306	0.0211417
ENSMUSG00000032656	333.852	-1.81979	0.519282	-3.50444	0.000457569	0.00223072
ENSMUSG00000032680	150.621	-0.808069	0.770232	-1.04912	0.294121	0.39087
ENSMUSG00000032740	765.628	-0.406098	0.461958	-0.879081	0.379358	0.477556
ENSMUSG00000032741	356.56	1.58352	0.452169	3.50206	0.000461667	0.00223272
ENSMUSG00000032782	147.328	-1.00442	0.677685	-1.48214	0.138304	0.219449
ENSMUSG00000032796	47.8114	-4.19703	0.988942	-4.24396	2.19608e-05	0.000189458
ENSMUSG00000032803	1675.17	1.18744	0.366231	3.24233	0.00118555	0.00487646
ENSMUSG00000032815	250.92	-2.06017	0.67514	-3.05147	0.00227727	0.00832933
ENSMUSG00000032818	2208.69	-1.42952	0.389711	-3.66814	0.00024432	0.00132725
ENSMUSG00000032827	337.472	-0.717714	0.517831	-1.386	0.165747	0.253258
ENSMUSG00000032842	217.35	-0.579781	0.507647	-1.1421	0.253414	0.348372
ENSMUSG00000032846	364.338	0.68183	0.394586	1.72797	0.0839945	0.148741
ENSMUSG00000032870	1314.46	-0.705221	0.41918	-1.68238	0.0924951	0.161201
ENSMUSG00000032908	155.094	-3.5727	0.656243	-5.44418	5.20451e-08	1.21954e-06
ENSMUSG00000032946	26.9075	-2.88796	1.08236	-2.6682	0.00762591	0.0221401
ENSMUSG00000032952	52.6174	-0.0150323	0.848336	-0.0177198	0.985862	0.988306
ENSMUSG00000032968	157.966	-1.36698	0.543579	-2.51478	0.0119106	0.0315992
ENSMUSG00000033004	1604.93	0.146514	0.406743	0.360213	0.718688	0.782222
ENSMUSG00000033009	425.031	-0.565578	0.465349	-1.21538	0.224219	0.31787
ENSMUSG00000033014	755.237	0.116785	0.321923	0.362772	0.716775	0.781091
ENSMUSG00000033020	2848.44	1.50943	0.370183	4.07752	4.55182e-05	0.00033947
ENSMUSG00000033036	27.742	3.06823	0.992115	3.09261	0.00198403	0.00744035
ENSMUSG00000033053	495.343	-0.747343	0.430382	-1.73646	0.082482	0.146563
ENSMUSG00000033060	2837.49	-1.91955	0.296165	-6.48135	9.0907e-11	5.79253e-09
ENSMUSG00000033065	1056.6	-1.08205	0.387163	-2.79483	0.00519272	0.0162586
ENSMUSG00000033066	682.642	-0.38229	0.357517	-1.06929	0.284939	0.381178
ENSMUSG00000033068	747.553	-1.69989	0.365733	-4.6479	3.35332e-06	3.90361e-05
ENSMUSG00000033177	224.91	-1.86984	0.456306	-4.09777	4.17155e-05	0.000317633
ENSMUSG00000033220	100.85	8.50036	1.69734	5.00804	5.4988e-07	8.49857e-06
ENSMUSG00000033228	2695.67	0.427517	0.372796	1.14679	0.25147	0.346619
ENSMUSG00000033233	106.232	-0.305505	0.746646	-0.409171	0.682414	0.752016
ENSMUSG00000033276	267.77	-2.69137	0.857879	-3.13724	0.00170547	0.00658264
ENSMUSG00000033307	23509.5	1.14913	0.442124	2.5991	0.00934673	0.0261536
ENSMUSG00000033342	1472.96	-2.63837	0.446247	-5.91235	3.37258e-09	1.21279e-07
ENSMUSG00000033379	5857.46	-0.441792	0.363642	-1.21491	0.2244	0.317905
ENSMUSG00000033419	1309.3	-1.96142	0.367913	-5.3312	9.75669e-08	1.95781e-06
ENSMUSG00000033420	279.21	2.76937	0.49974	5.54162	2.99684e-08	7.54739e-07
ENSMUSG00000033467	95.8953	1.81472	0.596918	3.04015	0.00236461	0.00858837
ENSMUSG00000033475	17.099	0.638292	1.12501	0.567364	0.570467	0.656091
ENSMUSG00000033486	124.563	-1.55113	0.766113	-2.02468	0.0429005	0.0879663
ENSMUSG00000033498	990.011	-2.19991	0.365462	-6.01952	1.74932e-09	7.1388e-08
ENSMUSG00000033565	533.989	-0.246233	0.417292	-0.590074	0.555141	0.641308
ENSMUSG00000033569	33.2296	1.13421	0.903478	1.25538	0.20934	0.301955
ENSMUSG00000033577	6932.28	-0.985932	0.301687	-3.26807	0.00108285	0.00451024
ENSMUSG00000033579	81.0054	-2.93717	0.677092	-4.33791	1.43843e-05	0.000133275
ENSMUSG00000033585	385.289	-0.585771	0.350836	-1.66964	0.0949897	0.164758
ENSMUSG00000033629	3399.72	-1.3213	0.349055	-3.78536	0.000153489	0.000916054
ENSMUSG00000033633	70.6893	-2.18402	0.828229	-2.63698	0.00836483	0.0239977
ENSMUSG00000033671	678.696	0.114518	0.382211	0.29962	0.764467	0.818798
ENSMUSG00000033720	335.917	1.9939	0.649531	3.06975	0.00214238	0.00790763
ENSMUSG00000033751	438.555	1.11872	0.351691	3.18099	0.00146775	0.00586453
ENSMUSG00000033768	190.871	-1.11031	0.780173	-1.42316	0.154689	0.239894
ENSMUSG00000033900	2399.7	-0.919309	0.348577	-2.63732	0.00835634	0.0239923
ENSMUSG00000033904	247.446	-0.813722	0.578451	-1.40673	0.159509	0.24569
ENSMUSG00000033931	763.924	-0.403365	0.440435	-0.915833	0.359754	0.458305
ENSMUSG00000033938	4538.04	1.4317	0.373546	3.83271	0.000126737	0.000793636
ENSMUSG00000033943	1193.93	-0.218334	0.360494	-0.605652	0.544746	0.631509
ENSMUSG00000033949	1952.43	-1.49937	0.34897	-4.29655	1.73478e-05	0.000156735
ENSMUSG00000033966	1434.72	-1.5775	0.343766	-4.58888	4.45624e-06	5.02642e-05
ENSMUSG00000033970	316.214	-0.423269	0.509868	-0.830154	0.406451	0.50349
ENSMUSG00000033981	21.6326	-3.73111	1.57051	-2.37574	0.017514	0.0425205
ENSMUSG00000034035	57.3447	-1.61484	0.846363	-1.90798	0.0563937	0.109355
ENSMUSG00000034040	48.3581	0.615115	0.889692	0.691379	0.489327	0.583466
ENSMUSG00000034059	130.936	-1.49776	0.508338	-2.94638	0.00321512	0.011006
ENSMUSG00000034101	1138.25	1.88652	0.43896	4.29769	1.72584e-05	0.000156315
ENSMUSG00000034108	1670.84	0.419565	0.347897	1.20601	0.227815	0.320956
ENSMUSG00000034109	451.466	-0.229811	0.465318	-0.493879	0.621392	0.700246
ENSMUSG00000034127	9571.12	1.92758	0.295144	6.53099	6.53382e-11	4.56362e-09
ENSMUSG00000034151	146.985	-0.85698	0.515355	-1.66289	0.0963341	0.166454
ENSMUSG00000034154	238.201	0.456168	0.440152	1.03639	0.300022	0.396391
ENSMUSG00000034160	1938.89	-0.49392	0.453986	-1.08796	0.276611	0.372231
ENSMUSG00000034163	341.891	-0.538697	0.561198	-0.959905	0.337103	0.436491
ENSMUSG00000034173	259.804	-0.428148	0.42485	-1.00776	0.313568	0.411743
ENSMUSG00000034192	751.254	1.03456	0.367043	2.81862	0.00482301	0.0152855
ENSMUSG00000034226	199.023	0.591409	0.611313	0.967441	0.333324	0.432733
ENSMUSG00000034227	1023.23	-0.873643	0.474417	-1.84151	0.0655472	0.123287
ENSMUSG00000034243	3437.41	0.00139332	0.413059	0.00337316	0.997309	0.997309
ENSMUSG00000034248	652.949	-1.19229	0.389352	-3.06224	0.0021969	0.00809243
ENSMUSG00000034252	2246.38	0.536097	0.296934	1.80544	0.0710058	0.130711
ENSMUSG00000034278	224.03	0.136689	0.46337	0.294989	0.768002	0.822342
ENSMUSG00000034292	258.745	0.464948	0.442337	1.05112	0.293205	0.389815
ENSMUSG00000034295	117.713	-0.34075	0.555858	-0.613016	0.539865	0.627855
ENSMUSG00000034297	1321.99	0.559237	0.308624	1.81203	0.0699812	0.129415
ENSMUSG00000034312	447.828	0.0164475	0.377177	0.0436069	0.965218	0.974068
ENSMUSG00000034329	2180.27	-1.32929	0.315461	-4.21379	2.51118e-05	0.000209669
ENSMUSG00000034334	460.254	-0.995863	0.486814	-2.04568	0.0407882	0.0845082
ENSMUSG00000034349	401.562	-0.175027	0.398383	-0.439344	0.660413	0.733298
ENSMUSG00000034382	113.753	1.52478	0.670399	2.27444	0.0229398	0.0530605
ENSMUSG00000034391	39.7156	-7.12853	1.41656	-5.03229	4.84645e-07	7.75433e-06
ENSMUSG00000034416	7.67558	-5.65314	2.26819	-2.49235	0.01269	0.0332299
ENSMUSG00000034427	1879.32	-2.08478	0.328315	-6.34993	2.15414e-10	1.16426e-08
ENSMUSG00000034456	3.93276	0.88888	2.12602	0.418096	0.675877	0.746817
ENSMUSG00000034467	3559.76	-0.652713	0.553656	-1.17892	0.238432	0.332176
ENSMUSG00000034486	165.534	-2.34602	0.729134	-3.21754	0.00129296	0.00527646
ENSMUSG00000034522	500.102	-0.702633	0.393514	-1.78554	0.0741745	0.135038
ENSMUSG00000034525	666.272	0.380308	0.360674	1.05444	0.291683	0.38834
ENSMUSG00000034532	253.24	-1.54997	0.491794	-3.15166	0.00162346	0.00631306
ENSMUSG00000034566	7384.47	0.775938	0.26967	2.87736	0.00401018	0.0131691
ENSMUSG00000034579	226.107	-2.69956	0.596078	-4.52887	5.92986e-06	6.27908e-05
ENSMUSG00000034602	943.928	0.0166691	0.442628	0.0376594	0.969959	0.976957
ENSMUSG00000034610	591.326	0.157097	0.489173	0.321149	0.748098	0.806019
ENSMUSG00000034613	762.463	-0.786731	0.35213	-2.2342	0.0254696	0.0574926
ENSMUSG00000034647	2482.45	0.274895	0.417747	0.658042	0.510511	0.601419
ENSMUSG00000034652	13.4303	-1.4052	1.5215	-0.923564	0.355713	0.454273
ENSMUSG00000034687	73.3313	1.17131	0.828789	1.41328	0.157572	0.243429
ENSMUSG00000034773	201.827	-0.75276	0.532514	-1.4136	0.157481	0.243391
ENSMUSG00000034789	1815.49	-0.135188	0.438669	-0.308177	0.757948	0.813911
ENSMUSG00000034799	160.878	-0.683057	0.768338	-0.889006	0.374	0.472671
ENSMUSG00000034832	731.721	0.440111	0.381486	1.15367	0.248634	0.343622
ENSMUSG00000034839	247.441	-0.878363	0.555981	-1.57984	0.114143	0.18982
ENSMUSG00000034842	679.213	-1.65122	0.504535	-3.27275	0.00106506	0.00445979
ENSMUSG00000034880	999.078	0.705754	0.399132	1.76822	0.0770241	0.139527
ENSMUSG00000034892	5704.94	2.05748	0.485377	4.23892	2.24598e-05	0.000192847
ENSMUSG00000034968	35.2404	-1.17543	1.2095	-0.971824	0.331138	0.430764
ENSMUSG00000034981	145.702	-0.262433	0.474823	-0.552696	0.580472	0.662979
ENSMUSG00000034993	1493.61	2.50732	0.466177	5.37847	7.51199e-08	1.58625e-06
ENSMUSG00000035021	550.846	1.28242	0.466679	2.74796	0.00599668	0.0181855
ENSMUSG00000035032	240.12	-2.38155	0.661111	-3.60235	0.000315357	0.00162695
ENSMUSG00000035042	71.7738	9.47052	1.66022	5.70439	1.16764e-08	3.44785e-07
ENSMUSG00000035048	1640.91	1.65206	0.434263	3.80429	0.000142213	0.000869556
ENSMUSG00000035067	134.069	-1.58817	0.565212	-2.80988	0.00495607	0.0156254
ENSMUSG00000035126	476.62	-1.55325	0.401335	-3.87021	0.000108742	0.000699029
ENSMUSG00000035142	341.637	-0.20574	0.378473	-0.543606	0.586713	0.668845
ENSMUSG00000035179	2845.2	-1.39139	0.485851	-2.86382	0.00418567	0.01361
ENSMUSG00000035189	1185.77	-1.73226	0.344969	-5.02149	5.12732e-07	8.13206e-06
ENSMUSG00000035199	3802.05	-1.61042	0.432917	-3.71993	0.000199279	0.00112738
ENSMUSG00000035202	77948.2	1.99633	0.626109	3.18848	0.00143024	0.00572098
ENSMUSG00000035211	45.5986	-1.5821	0.901419	-1.75512	0.0792389	0.142332
ENSMUSG00000035215	1139.36	0.626034	0.302478	2.06968	0.0384819	0.0804642
ENSMUSG00000035234	146.284	-0.816108	0.50385	-1.61974	0.105288	0.17846
ENSMUSG00000035236	315.59	-1.09685	0.42598	-2.57488	0.0100274	0.0275813
ENSMUSG00000035247	2659.56	-0.0607802	0.349712	-0.173801	0.862022	0.898899
ENSMUSG00000035266	287.368	-0.572121	0.472234	-1.21152	0.225696	0.319333
ENSMUSG00000035284	149.329	-0.560607	0.550554	-1.01826	0.308555	0.405893
ENSMUSG00000035285	777.605	-0.591303	0.398642	-1.48329	0.137996	0.219153
ENSMUSG00000035351	265.51	-0.839536	0.424688	-1.97683	0.0480611	0.0965475
ENSMUSG00000035352	567.985	4.89279	0.729798	6.7043	2.02371e-11	1.70933e-09
ENSMUSG00000035364	19.4818	1.56308	1.17299	1.33256	0.182675	0.272586
ENSMUSG00000035378	345.097	-1.08439	0.528932	-2.05015	0.04035	0.0837914
ENSMUSG00000035390	88.5284	-0.775859	0.659211	-1.17695	0.239215	0.333013
ENSMUSG00000035394	248.311	-0.719197	0.494381	-1.45474	0.14574	0.229246
ENSMUSG00000035407	111.203	0.755275	0.596968	1.26519	0.205805	0.298954
ENSMUSG00000035458	46.264	-1.03701	1.06247	-0.976035	0.329047	0.428658
ENSMUSG00000035486	81.449	-0.810249	0.812297	-0.997479	0.318532	0.417807
ENSMUSG00000035569	2115.22	0.320267	0.361767	0.885285	0.376003	0.47471
ENSMUSG00000035578	1096.83	-1.54165	0.389938	-3.95358	7.69908e-05	0.000527605
ENSMUSG00000035621	366.67	1.23673	0.545383	2.26764	0.0233509	0.0537796
ENSMUSG00000035623	1121.59	0.682127	0.426528	1.59926	0.109763	0.184387
ENSMUSG00000035640	554.74	0.738881	0.514096	1.43724	0.150648	0.235032
ENSMUSG00000035649	613.536	1.38559	0.367768	3.76756	0.000164848	0.000975085
ENSMUSG00000035674	4790.59	1.29788	0.34602	3.7509	0.000176203	0.00102502
ENSMUSG00000035681	44.7437	-2.58882	1.34495	-1.92484	0.0542488	0.106331
ENSMUSG00000035704	311.631	-1.00182	0.554603	-1.80636	0.0708614	0.130511
ENSMUSG00000035711	55.6012	0.227089	1.04205	0.217925	0.827488	0.870636
ENSMUSG00000035775	179.839	-1.97783	0.544044	-3.63542	0.000277525	0.00147149
ENSMUSG00000035790	1182.23	-1.71149	0.547441	-3.12635	0.00176989	0.00675947
ENSMUSG00000035849	433.332	-2.11665	0.389936	-5.42819	5.69274e-08	1.30489e-06
ENSMUSG00000035851	1578.05	0.441733	0.384785	1.148	0.250969	0.346059
ENSMUSG00000035864	347.776	-0.552232	0.3669	-1.50513	0.13229	0.212131
ENSMUSG00000035910	42.6736	-2.39602	1.25437	-1.91014	0.056115	0.109047
ENSMUSG00000035930	388.351	-1.55559	0.430546	-3.61306	0.0003026	0.00157682
ENSMUSG00000035964	3556.08	-2.43259	0.283941	-8.56723	1.06002e-17	2.96153e-15
ENSMUSG00000035984	1504.03	-0.958631	0.502153	-1.90904	0.0562566	0.109264
ENSMUSG00000035992	796.804	0.497546	0.360007	1.38204	0.166958	0.254573
ENSMUSG00000036053	611.827	2.72997	0.408033	6.69056	2.2232e-11	1.83515e-09
ENSMUSG00000036057	408.75	0.422416	0.424335	0.995479	0.319503	0.418628
ENSMUSG00000036098	14.9432	-1.35531	1.86267	-0.727619	0.466847	0.563506
ENSMUSG00000036110	50.8994	-4.82581	1.00862	-4.78457	1.71355e-06	2.22843e-05
ENSMUSG00000036111	1009.58	-1.01762	0.447485	-2.27409	0.0229606	0.0530605
ENSMUSG00000036114	1720.29	-0.265387	0.286145	-0.927456	0.35369	0.452324
ENSMUSG00000036168	10.8729	0.0084118	1.58161	0.0053185	0.995756	0.996061
ENSMUSG00000036181	315.436	-1.65072	0.470025	-3.51197	0.000444798	0.002192
ENSMUSG00000036186	128.168	-1.85124	0.732925	-2.52583	0.0115426	0.0307803
ENSMUSG00000036192	83.9824	1.58194	0.710611	2.22617	0.0260029	0.0584061
ENSMUSG00000036199	6473.84	1.11655	0.367422	3.03889	0.00237455	0.00859684
ENSMUSG00000036214	126.633	-0.409995	0.569555	-0.719852	0.471616	0.567753
ENSMUSG00000036225	162.984	0.26753	0.496683	0.538633	0.59014	0.671278
ENSMUSG00000036231	1898.3	2.69367	0.399622	6.74054	1.57799e-11	1.39787e-09
ENSMUSG00000036242	107.366	-2.82831	0.664495	-4.25633	2.0781e-05	0.000181871
ENSMUSG00000036278	952.49	-0.659047	0.347516	-1.89645	0.0579008	0.111504
ENSMUSG00000036305	431.87	2.44767	0.527506	4.64008	3.4828e-06	4.01572e-05
ENSMUSG00000036356	108.77	-1.38554	0.634997	-2.18196	0.0291128	0.0640834
ENSMUSG00000036372	2954.21	1.21642	0.415087	2.93053	0.00338387	0.0114862
ENSMUSG00000036377	292.497	-1.59116	0.643984	-2.47081	0.0134807	0.0347741
ENSMUSG00000036391	377.499	1.01487	0.483947	2.09706	0.0359883	0.0760428
ENSMUSG00000036430	3102.43	-0.143094	0.461024	-0.310383	0.75627	0.812895
ENSMUSG00000036438	60216.4	-0.97876	0.441123	-2.21879	0.026501	0.0592319
ENSMUSG00000036466	208.934	-0.382051	0.440872	-0.86658	0.386172	0.48465
ENSMUSG00000036499	1070.86	0.740871	0.439645	1.68516	0.0919579	0.160418
ENSMUSG00000036503	2160.92	-0.565025	0.342389	-1.65024	0.0988931	0.169664
ENSMUSG00000036504	207.371	1.25318	0.441851	2.8362	0.00456541	0.0146214
ENSMUSG00000036528	1804.13	-0.188898	0.358703	-0.526614	0.598461	0.679466
ENSMUSG00000036537	129.119	-0.440264	0.525313	-0.838098	0.401975	0.499478
ENSMUSG00000036551	287.423	-2.03345	0.511545	-3.97513	7.0342e-05	0.000491312
ENSMUSG00000036564	193.942	-1.38811	0.571431	-2.42918	0.0151331	0.0380601
ENSMUSG00000036572	967.187	-0.0465115	0.339154	-0.13714	0.89092	0.91979
ENSMUSG00000036594	171.983	4.53311	1.92156	2.35907	0.0183206	0.0441542
ENSMUSG00000036598	136.765	-2.30045	0.716047	-3.2127	0.00131491	0.005354
ENSMUSG00000036617	692.075	1.4434	0.380375	3.79467	0.000147842	0.00089345
ENSMUSG00000036639	367.896	0.481878	0.392152	1.22881	0.219145	0.312867
ENSMUSG00000036699	2332.48	-2.21225	0.334007	-6.62335	3.51144e-11	2.77251e-09
ENSMUSG00000036745	1310.74	-0.195005	0.361565	-0.539337	0.589654	0.670935
ENSMUSG00000036751	9693.86	0.944555	0.269653	3.50286	0.000460293	0.00223218
ENSMUSG00000036764	610.753	-1.37296	0.613306	-2.23862	0.0251808	0.057004
ENSMUSG00000036766	2606.93	-3.48292	0.454498	-7.66322	1.81324e-14	2.99349e-12
ENSMUSG00000036815	122.867	-1.74719	0.813809	-2.14693	0.0317992	0.0689109
ENSMUSG00000036820	657.646	1.17659	0.413194	2.84755	0.00440576	0.0141933
ENSMUSG00000036835	2334.77	0.553684	0.344425	1.60756	0.107931	0.181962
ENSMUSG00000036853	3482.36	-2.1867	0.319499	-6.84415	7.69301e-12	7.55162e-10
ENSMUSG00000036887	849.046	5.48352	2.09992	2.6113	0.00901988	0.0254349
ENSMUSG00000036896	1046.07	6.79827	1.30745	5.19965	1.99662e-07	3.77693e-06
ENSMUSG00000036905	1298.82	2.6152	0.531062	4.92448	8.45855e-07	1.20951e-05
ENSMUSG00000036918	3100.22	-1.55749	0.382054	-4.07663	4.56939e-05	0.000340083
ENSMUSG00000036959	121.124	1.29802	0.670403	1.93618	0.0528451	0.104255
ENSMUSG00000037101	1189.07	-2.16076	0.352013	-6.13831	8.34031e-10	3.73975e-08
ENSMUSG00000037103	278.304	-0.087863	0.435124	-0.201926	0.839974	0.880204
ENSMUSG00000037108	72.0374	-0.0503637	0.665558	-0.0756714	0.939681	0.958416
ENSMUSG00000037111	279.898	1.46185	0.465092	3.14314	0.00167147	0.00646515
ENSMUSG00000037126	97.1892	0.749234	0.657488	1.13954	0.254478	0.349438
ENSMUSG00000037151	228.909	-1.1256	0.528224	-2.13091	0.0330962	0.0711274
ENSMUSG00000037159	285.783	-2.85598	0.543883	-5.25108	1.51207e-07	2.9368e-06
ENSMUSG00000037161	511.91	-0.58367	0.541847	-1.07719	0.281397	0.377553
ENSMUSG00000037166	127.566	-0.0938405	0.577742	-0.162426	0.87097	0.903743
ENSMUSG00000037169	162.731	-2.17516	0.524451	-4.14751	3.36113e-05	0.000267125
ENSMUSG00000037172	409.287	-0.938939	0.3747	-2.50584	0.012216	0.032268
ENSMUSG00000037190	3876.68	-1.71469	0.441461	-3.88413	0.000102696	0.000668445
ENSMUSG00000037196	1140.72	-1.31792	0.453103	-2.90866	0.00362978	0.0121506
ENSMUSG00000037197	2151.43	-0.11503	0.361339	-0.318343	0.750225	0.807592
ENSMUSG00000037204	1303.02	0.240719	0.461764	0.521302	0.602156	0.682594
ENSMUSG00000037210	490.174	0.200914	0.404859	0.496258	0.619713	0.699222
ENSMUSG00000037243	250.352	-0.954817	0.472708	-2.01989	0.0433953	0.0886455
ENSMUSG00000037266	4647.85	-0.0922075	0.449463	-0.20515	0.837455	0.878109
ENSMUSG00000037270	805.834	-0.0343938	0.460519	-0.0746847	0.940466	0.958678
ENSMUSG00000037278	566.452	-0.807689	0.341522	-2.36497	0.0180317	0.0435446
ENSMUSG00000037325	232.574	-2.24344	0.643278	-3.48751	0.000487539	0.00231772
ENSMUSG00000037355	184.64	0.149949	0.554678	0.270335	0.786903	0.837887
ENSMUSG00000037408	294.495	-0.427689	0.383385	-1.11556	0.264609	0.359948
ENSMUSG00000037416	611.056	1.08091	0.385753	2.80209	0.0050773	0.0159522
ENSMUSG00000037418	291.715	-2.52428	0.473278	-5.33361	9.62777e-08	1.94267e-06
ENSMUSG00000037428	327.85	-2.43828	0.501145	-4.86542	1.14215e-06	1.5654e-05
ENSMUSG00000037438	163.257	0.888812	0.453087	1.96168	0.0497997	0.099217
ENSMUSG00000037486	687.308	-0.0550872	0.437367	-0.125952	0.89977	0.926819
ENSMUSG00000037525	242.232	-0.975301	0.417979	-2.33337	0.0196285	0.046748
ENSMUSG00000037541	1036.45	-1.45713	0.346108	-4.21005	2.55318e-05	0.000211716
ENSMUSG00000037563	3224.17	2.18449	0.338488	6.45368	1.09167e-10	6.72024e-09
ENSMUSG00000037593	5.87122	0.123557	2.77062	0.0445954	0.96443	0.973669
ENSMUSG00000037646	441.914	-0.536585	0.488346	-1.09878	0.271863	0.367551
ENSMUSG00000037679	495.421	2.54226	0.517461	4.91296	8.97137e-07	1.26786e-05
ENSMUSG00000037683	442.773	-1.9933	0.446728	-4.462	8.11966e-06	8.30418e-05
ENSMUSG00000037685	1076.24	-0.90052	0.345343	-2.60761	0.00911765	0.0256558
ENSMUSG00000037692	264.281	0.673716	0.564581	1.1933	0.232751	0.326013
ENSMUSG00000037716	816.643	-2.00248	0.407032	-4.91972	8.66696e-07	1.23445e-05
ENSMUSG00000037738	185.467	-1.56722	0.662368	-2.36609	0.0179772	0.0434709
ENSMUSG00000037772	1700.34	0.652268	0.287401	2.26954	0.0232355	0.0535924
ENSMUSG00000037784	178.252	-1.11179	0.615084	-1.80754	0.0706788	0.130307
ENSMUSG00000037805	1634.66	1.32413	0.373787	3.54246	0.000396406	0.00198586
ENSMUSG00000037826	345.118	0.488372	0.383046	1.27497	0.20232	0.295229
ENSMUSG00000037847	243.586	-1.03542	0.416287	-2.48727	0.0128727	0.0336304
ENSMUSG00000037852	27494.3	-2.16676	0.473735	-4.57378	4.78994e-06	5.28786e-05
ENSMUSG00000037876	2064.43	0.369033	0.358061	1.03064	0.302709	0.399506
ENSMUSG00000037887	569.337	-0.811765	0.530041	-1.53151	0.125643	0.203974
ENSMUSG00000037894	3879.77	-0.0667134	0.299295	-0.222901	0.823612	0.867815
ENSMUSG00000037940	13.344	-2.2173	2.15492	-1.02894	0.303506	0.400412
ENSMUSG00000037958	1640.7	0.2316	0.356595	0.649475	0.516032	0.605936
ENSMUSG00000038002	245.757	1.27828	0.440172	2.90406	0.00368361	0.0122855
ENSMUSG00000038010	155.956	-1.61014	0.665516	-2.41938	0.0155468	0.0387817
ENSMUSG00000038011	65.7016	-3.14114	0.922664	-3.40442	0.000663043	0.00296573
ENSMUSG00000038013	887.791	-0.328402	0.349201	-0.940438	0.346993	0.445523
ENSMUSG00000038014	2334.03	0.349613	0.335679	1.04151	0.297638	0.39439
ENSMUSG00000038020	390.596	-1.53338	0.366599	-4.18273	2.88034e-05	0.000234036
ENSMUSG00000038025	724.047	0.966288	0.426276	2.26681	0.0234016	0.0538621
ENSMUSG00000038039	1191.86	-0.641885	0.396438	-1.61913	0.10542	0.178501
ENSMUSG00000038056	1264.71	0.0757893	0.458902	0.165154	0.868823	0.903656
ENSMUSG00000038060	28.4631	-2.0079	1.33688	-1.50193	0.133114	0.213077
ENSMUSG00000038070	339.412	-0.964729	0.431118	-2.23774	0.0252382	0.0570614
ENSMUSG00000038079	868.005	-0.456713	0.35813	-1.27527	0.202212	0.295191
ENSMUSG00000038095	1891.7	-0.0803282	0.303064	-0.265053	0.790968	0.841475
ENSMUSG00000038116	1411.05	-0.540682	0.457347	-1.18221	0.237121	0.331113
ENSMUSG00000038119	733.246	0.276441	0.511519	0.540432	0.588899	0.670706
ENSMUSG00000038132	2851.55	-1.47603	0.376089	-3.92468	8.68456e-05	0.000579822
ENSMUSG00000038135	27.1406	1.32295	1.26581	1.04514	0.295958	0.392736
ENSMUSG00000038143	513.493	0.741912	0.385866	1.92272	0.0545154	0.10664
ENSMUSG00000038150	12466.1	-1.5234	0.43073	-3.53678	0.00040503	0.00202348
ENSMUSG00000038152	242.473	-1.20755	0.499364	-2.41817	0.0155989	0.0388315
ENSMUSG00000038179	27.1196	8.06927	1.85944	4.33962	1.4273e-05	0.000132581
ENSMUSG00000038201	58.0444	-0.979629	0.731619	-1.33899	0.180575	0.270119
ENSMUSG00000038215	264.102	-0.640178	0.587309	-1.09002	0.275705	0.371287
ENSMUSG00000038241	142.919	1.04792	0.558349	1.87682	0.0605423	0.115246
ENSMUSG00000038271	216.803	-1.87118	0.576189	-3.24751	0.00116419	0.00480492
ENSMUSG00000038274	5194.79	2.33438	0.421317	5.54067	3.01314e-08	7.54739e-07
ENSMUSG00000038286	860.723	-0.527954	0.404914	-1.30386	0.19228	0.283755
ENSMUSG00000038295	164.086	-1.25227	0.531456	-2.3563	0.0184583	0.0443976
ENSMUSG00000038296	106.545	-1.03866	0.716741	-1.44914	0.147299	0.231497
ENSMUSG00000038312	800.979	-1.11713	0.39918	-2.79856	0.00513305	0.0161134
ENSMUSG00000038319	337.068	-0.85564	0.383932	-2.22863	0.0258388	0.0580734
ENSMUSG00000038342	873.917	-0.862565	0.355777	-2.42445	0.0153314	0.0383232
ENSMUSG00000038352	418.49	1.70104	0.626999	2.71299	0.00666785	0.0198343
ENSMUSG00000038374	3362.54	0.904899	0.280256	3.22883	0.00124296	0.00509531
ENSMUSG00000038384	422.222	0.144463	0.375257	0.384971	0.700259	0.767222
ENSMUSG00000038400	1407.27	1.1972	0.315005	3.80058	0.000144359	0.000878247
ENSMUSG00000038412	8509.88	2.00753	0.375474	5.34664	8.96005e-08	1.82825e-06
ENSMUSG00000038437	898.251	0.0593686	0.400486	0.148241	0.882152	0.912554
ENSMUSG00000038453	493.234	-1.00499	0.335246	-2.99776	0.0027197	0.00959023
ENSMUSG00000038457	4288.92	-2.07266	0.45239	-4.58157	4.6149e-06	5.15231e-05
ENSMUSG00000038467	1572.81	1.94273	0.335886	5.78389	7.29941e-09	2.38842e-07
ENSMUSG00000038485	631.558	0.528912	0.338415	1.56291	0.118074	0.195196
ENSMUSG00000038486	805.75	-1.91531	0.39906	-4.79956	1.59016e-06	2.08501e-05
ENSMUSG00000038495	2566.41	0.71861	0.30942	2.32244	0.020209	0.0479107
ENSMUSG00000038520	950.632	-1.60291	0.377263	-4.24878	2.14936e-05	0.000185868
ENSMUSG00000038525	477.13	1.00971	0.451245	2.2376	0.0252472	0.0570614
ENSMUSG00000038538	1330.14	-0.513115	0.323264	-1.5873	0.112446	0.187772
ENSMUSG00000038539	579.839	2.01532	0.454158	4.43748	9.10165e-06	9.13182e-05
ENSMUSG00000038555	337.745	-1.98603	0.530045	-3.74691	0.000179025	0.00103373
ENSMUSG00000038576	273.928	-2.39909	0.471603	-5.0871	3.63586e-07	6.17076e-06
ENSMUSG00000038593	261.146	-0.472621	0.456596	-1.0351	0.300624	0.397043
ENSMUSG00000038608	879.303	-0.717394	0.448822	-1.59839	0.109956	0.184461
ENSMUSG00000038637	223.42	-2.12329	0.493178	-4.30533	1.66741e-05	0.000152545
ENSMUSG00000038642	1037.99	5.99212	0.649972	9.21905	2.9974e-20	9.07213e-18
ENSMUSG00000038646	1060.01	-0.538686	0.510455	-1.05531	0.291285	0.387953
ENSMUSG00000038664	789.08	-0.0985058	0.461681	-0.213363	0.831044	0.87286
ENSMUSG00000038679	222.19	0.21832	0.424118	0.514762	0.606719	0.686481
ENSMUSG00000038690	6933.95	1.44496	0.386967	3.73406	0.000188416	0.00107768
ENSMUSG00000038717	2159.02	1.16225	0.317331	3.66259	0.000249678	0.00135146
ENSMUSG00000038733	1514.4	0.110425	0.341567	0.32329	0.746475	0.805236
ENSMUSG00000038738	183.77	-1.32548	0.429999	-3.08253	0.00205251	0.00765372
ENSMUSG00000038742	131.74	-0.262741	0.540798	-0.48584	0.62708	0.705126
ENSMUSG00000038762	2669.6	1.28889	0.410285	3.14146	0.00168106	0.00649535
ENSMUSG00000038764	1473.22	-1.29977	0.292977	-4.43642	9.14661e-06	9.15165e-05
ENSMUSG00000038765	52.8591	-2.08469	0.805468	-2.58818	0.00964851	0.0267303
ENSMUSG00000038766	368.693	0.853444	0.453593	1.88152	0.059901	0.114343
ENSMUSG00000038773	671.89	-0.46044	0.415744	-1.10751	0.268074	0.363708
ENSMUSG00000038776	3958.65	-1.29885	0.327247	-3.96902	7.21677e-05	0.000501117
ENSMUSG00000038811	76.0712	9.54794	1.65135	5.7819	7.38596e-09	2.39516e-07
ENSMUSG00000038812	1410.6	0.567512	0.304119	1.86609	0.0620292	0.117706
ENSMUSG00000038855	819.648	1.39318	0.57817	2.40963	0.0159686	0.0394544
ENSMUSG00000038872	1117.22	2.32801	0.430919	5.40243	6.57431e-08	1.45929e-06
ENSMUSG00000038902	542.73	-0.098114	0.356297	-0.275371	0.783031	0.834253
ENSMUSG00000038903	2064.01	-0.988371	0.456943	-2.16301	0.0305404	0.0667807
ENSMUSG00000038916	115.788	-2.10604	0.537659	-3.91706	8.96362e-05	0.000594085
ENSMUSG00000038930	154.169	-1.07914	0.524037	-2.05927	0.0394682	0.0821953
ENSMUSG00000038975	1348.52	0.259526	0.301984	0.859405	0.390117	0.488425
ENSMUSG00000038976	487.208	0.386872	0.410176	0.943185	0.345586	0.444465
ENSMUSG00000038987	114.204	-2.36198	0.824383	-2.86515	0.00416807	0.0135649
ENSMUSG00000039001	2898.7	2.13318	0.495439	4.30563	1.66514e-05	0.000152545
ENSMUSG00000039018	382.157	-1.19482	0.439289	-2.71991	0.00653004	0.0194882
ENSMUSG00000039065	246.637	0.18452	0.470677	0.392031	0.695035	0.763341
ENSMUSG00000039098	15.5865	0.0588695	1.23307	0.0477423	0.961922	0.972904
ENSMUSG00000039100	716.981	-0.237841	0.373669	-0.636501	0.52445	0.613463
ENSMUSG00000039110	1546.5	-1.09567	0.392966	-2.78821	0.00530004	0.0164618
ENSMUSG00000039163	631.635	0.741573	0.393131	1.88632	0.0592513	0.113323
ENSMUSG00000039193	27.5489	5.63059	1.81099	3.10913	0.00187637	0.00712119
ENSMUSG00000039208	760.395	-0.244774	0.459085	-0.533178	0.593911	0.675355
ENSMUSG00000039209	9.27698	5.08627	2.19193	2.32045	0.0203164	0.0481338
ENSMUSG00000039218	7096.27	0.515218	0.428609	1.20207	0.229336	0.322474
ENSMUSG00000039219	2334.61	0.146345	0.39779	0.367895	0.712951	0.778077
ENSMUSG00000039221	859.37	1.17852	0.327974	3.59334	0.000326468	0.0016745
ENSMUSG00000039231	242.597	-0.286498	0.42231	-0.678406	0.497514	0.590916
ENSMUSG00000039253	64.4404	-0.683756	0.66075	-1.03482	0.300754	0.39707
ENSMUSG00000039278	95.5996	-2.8842	0.7312	-3.94447	7.99751e-05	0.000543951
ENSMUSG00000039298	2433.84	-1.15145	0.3334	-3.45365	0.000553061	0.00256869
ENSMUSG00000039307	173.998	-2.07696	0.455545	-4.55927	5.13308e-06	5.51578e-05
ENSMUSG00000039349	102.888	9.98889	1.57408	6.34586	2.21184e-10	1.16426e-08
ENSMUSG00000039361	1353.8	1.44272	0.384985	3.74747	0.00017863	0.00103309
ENSMUSG00000039382	308.502	-0.263889	0.392623	-0.672118	0.501508	0.594089
ENSMUSG00000039391	1360.95	-1.15031	0.311314	-3.69501	0.000219874	0.00122294
ENSMUSG00000039419	1212.62	-1.05841	0.361595	-2.92706	0.00342188	0.0115935
ENSMUSG00000039478	717.074	-0.0283163	0.357349	-0.0792399	0.936842	0.956595
ENSMUSG00000039485	919.622	-1.41647	0.335274	-4.22482	2.3913e-05	0.000202452
ENSMUSG00000039519	317.081	-1.81835	0.457372	-3.97564	7.01908e-05	0.000491201
ENSMUSG00000039530	2979.04	-1.73424	0.419642	-4.13266	3.5859e-05	0.000279508
ENSMUSG00000039531	199.601	-1.35981	0.529764	-2.56682	0.0102637	0.0280284
ENSMUSG00000039542	609.668	-1.97084	0.362092	-5.44293	5.24107e-08	1.22023e-06
ENSMUSG00000039585	952.942	0.530501	0.355841	1.49084	0.136004	0.216673
ENSMUSG00000039628	1222.32	-1.43723	0.52038	-2.76188	0.00574689	0.0175549
ENSMUSG00000039671	1292.31	0.401744	0.410756	0.97806	0.328045	0.427813
ENSMUSG00000039676	814.768	-1.25245	0.627764	-1.99509	0.0460328	0.0929872
ENSMUSG00000039678	106.403	1.00238	0.612053	1.63773	0.101477	0.172954
ENSMUSG00000039680	9282.36	-0.553636	0.34243	-1.61679	0.105925	0.179189
ENSMUSG00000039683	618.278	-0.542735	0.441502	-1.22929	0.218963	0.312792
ENSMUSG00000039715	1342.61	-1.15877	0.446593	-2.59468	0.00946793	0.0263506
ENSMUSG00000039716	208.889	-1.04044	0.555428	-1.87322	0.0610375	0.116067
ENSMUSG00000039735	593.253	1.11828	0.413105	2.70701	0.00678927	0.0201459
ENSMUSG00000039745	412.192	-0.428742	0.485073	-0.88387	0.376766	0.474979
ENSMUSG00000039759	516.98	-0.591697	0.420165	-1.40825	0.159057	0.245306
ENSMUSG00000039795	338.242	-1.14354	0.746244	-1.5324	0.125424	0.203888
ENSMUSG00000039801	464.312	-1.58944	0.489517	-3.24696	0.00116646	0.00480885
ENSMUSG00000039844	968.002	0.335412	0.368002	0.911439	0.362064	0.459957
ENSMUSG00000039852	1532.43	-0.20586	0.437813	-0.470201	0.638211	0.713445
ENSMUSG00000039860	378.763	-0.991613	0.399571	-2.4817	0.0130759	0.0340198
ENSMUSG00000039878	19.7173	2.68276	1.40695	1.90679	0.0565473	0.109594
ENSMUSG00000039910	1244.46	-1.14828	0.350132	-3.27956	0.0010397	0.00438073
ENSMUSG00000039958	415.209	-1.37866	0.458529	-3.00671	0.00264096	0.00938548
ENSMUSG00000039968	355.574	-0.0782447	0.462635	-0.169128	0.865696	0.901177
ENSMUSG00000039976	256.31	-0.991668	0.410359	-2.41659	0.0156668	0.0389472
ENSMUSG00000039987	713.726	-1.52664	0.379989	-4.01759	5.87958e-05	0.000420367
ENSMUSG00000039997	44.0065	8.76717	1.80029	4.86985	1.11681e-06	1.54231e-05
ENSMUSG00000040022	370.624	0.810909	0.436258	1.85879	0.0630575	0.119471
ENSMUSG00000040026	167.919	9.26735	1.73463	5.34254	9.16514e-08	1.85965e-06
ENSMUSG00000040037	447.513	-1.68396	0.465742	-3.61565	0.000299595	0.00156641
ENSMUSG00000040040	399.212	-0.103171	0.474891	-0.217253	0.828011	0.870934
ENSMUSG00000040048	4902.7	0.901135	0.281697	3.19895	0.00137928	0.00556618
ENSMUSG00000040054	891.556	0.146132	0.304786	0.479456	0.631614	0.708907
ENSMUSG00000040112	1461.77	0.0892904	0.34966	0.255363	0.798442	0.847128
ENSMUSG00000040118	397.192	-1.1986	0.597398	-2.00636	0.0448177	0.0910392
ENSMUSG00000040167	232.946	0.832954	0.454677	1.83197	0.0669561	0.125159
ENSMUSG00000040177	483.411	-1.18742	0.528947	-2.24487	0.0247766	0.0564545
ENSMUSG00000040189	772.86	-1.65521	0.454156	-3.64459	0.000267821	0.00142838
ENSMUSG00000040195	171.637	-1.34738	0.514278	-2.61994	0.00879446	0.0249698
ENSMUSG00000040204	23.9003	2.85844	1.50755	1.89609	0.0579487	0.111537
ENSMUSG00000040209	523.152	0.053487	0.400645	0.133502	0.893796	0.921997
ENSMUSG00000040220	759.036	-0.566447	0.349953	-1.61864	0.105526	0.178597
ENSMUSG00000040225	1894.4	0.795404	0.331477	2.39958	0.0164141	0.0403902
ENSMUSG00000040269	1564.19	1.4804	0.291837	5.0727	3.92215e-07	6.50468e-06
ENSMUSG00000040276	792.473	-1.11204	0.473867	-2.34675	0.0189382	0.0453276
ENSMUSG00000040365	352.074	-0.00622072	0.551985	-0.0112697	0.991008	0.992374
ENSMUSG00000040407	5201.55	-1.17354	0.345431	-3.39731	0.000680519	0.00302898
ENSMUSG00000040414	516.548	-0.175631	0.371715	-0.472488	0.636579	0.712058
ENSMUSG00000040459	1533.67	0.902337	0.38329	2.35419	0.0185632	0.0446205
ENSMUSG00000040466	947.715	2.17761	0.338574	6.43173	1.26158e-10	7.63677e-09
ENSMUSG00000040473	1560.98	-1.4128	0.425624	-3.31935	0.000902264	0.00388171
ENSMUSG00000040481	2323.88	0.316451	0.364941	0.867128	0.385872	0.484441
ENSMUSG00000040521	1108.81	0.827068	0.473069	1.7483	0.0804113	0.143798
ENSMUSG00000040537	226.543	-2.05979	0.629476	-3.27222	0.00106706	0.00445979
ENSMUSG00000040649	725.391	-0.823621	0.336784	-2.44555	0.0144631	0.0368116
ENSMUSG00000040658	586.008	0.393032	0.45165	0.870215	0.384183	0.482654
ENSMUSG00000040661	229.493	0.50978	0.426073	1.19646	0.231517	0.32466
ENSMUSG00000040680	13.1086	1.2318	1.62807	0.756602	0.449288	0.54607
ENSMUSG00000040711	490.817	1.42255	0.382253	3.72149	0.000198054	0.0011222
ENSMUSG00000040721	167.477	0.725071	0.610129	1.18839	0.23468	0.328209
ENSMUSG00000040722	487.22	-2.02229	0.490775	-4.12061	3.77866e-05	0.000292624
ENSMUSG00000040746	1894.62	-1.06459	0.336525	-3.16347	0.001559	0.00614118
ENSMUSG00000040761	813.387	-0.0381804	0.381226	-0.100152	0.920224	0.94494
ENSMUSG00000040767	582.269	0.314024	0.419463	0.748634	0.454078	0.550655
ENSMUSG00000040770	80.6325	-2.77491	1.20312	-2.30644	0.0210863	0.0494174
ENSMUSG00000040785	5374.24	-0.42972	0.275986	-1.55704	0.119462	0.196595
ENSMUSG00000040824	2107.53	1.39253	0.403086	3.45468	0.000550945	0.00256214
ENSMUSG00000040841	148.643	-0.948266	0.484698	-1.95641	0.0504174	0.100118
ENSMUSG00000040850	1091.16	-0.267712	0.350874	-0.762986	0.445472	0.542209
ENSMUSG00000040857	223.855	1.25761	0.484093	2.59786	0.00938073	0.0262225
ENSMUSG00000040865	526.132	0.741408	0.466353	1.5898	0.11188	0.186998
ENSMUSG00000040867	49.2914	-0.131405	0.692755	-0.189684	0.849556	0.887939
ENSMUSG00000040883	1653.55	0.449502	0.320459	1.40268	0.160711	0.246809
ENSMUSG00000040896	96.3141	-1.50699	0.624116	-2.41459	0.0157529	0.0390405
ENSMUSG00000040929	601.668	-1.01877	0.319177	-3.19185	0.00141363	0.00566699
ENSMUSG00000040969	75.6298	0.532294	0.75284	0.707048	0.479537	0.575191
ENSMUSG00000040972	1228.4	-2.07652	0.490376	-4.23456	2.29e-05	0.000195242
ENSMUSG00000041020	333.794	-0.800756	0.37202	-2.15245	0.0313616	0.0681253
ENSMUSG00000041025	576.15	0.880911	0.464004	1.8985	0.0576301	0.111218
ENSMUSG00000041035	1962.24	-0.0430843	0.347546	-0.123967	0.901341	0.927808
ENSMUSG00000041062	594.193	-2.49307	0.4368	-5.70756	1.14606e-08	3.41188e-07
ENSMUSG00000041132	120.714	-2.11813	0.635328	-3.33392	0.000856325	0.00371142
ENSMUSG00000041133	1976.89	0.0653017	0.399218	0.163574	0.870066	0.903743
ENSMUSG00000041147	112.348	-1.18904	0.619671	-1.91883	0.0550059	0.107294
ENSMUSG00000041161	985.419	-1.08804	0.354374	-3.07032	0.00213827	0.0079005
ENSMUSG00000041203	3530.35	0.874053	0.309779	2.82154	0.00477937	0.015183
ENSMUSG00000041220	730.628	-0.955123	0.326735	-2.92324	0.00346411	0.0117039
ENSMUSG00000041235	1328.28	0.032599	0.356874	0.091346	0.927218	0.949705
ENSMUSG00000041245	117.631	-1.08413	0.567	-1.91204	0.0558713	0.10869
ENSMUSG00000041258	406.703	-0.316373	0.572315	-0.552795	0.580404	0.662979
ENSMUSG00000041261	154.764	-1.72229	0.670499	-2.56867	0.010209	0.0279631
ENSMUSG00000041268	683.019	-1.36208	0.354708	-3.84	0.000123037	0.00077447
ENSMUSG00000041297	797.521	-0.324231	0.460119	-0.704668	0.481017	0.576395
ENSMUSG00000041324	216.843	-0.550971	0.514765	-1.07034	0.284468	0.380829
ENSMUSG00000041328	1111.04	-0.158266	0.347473	-0.455478	0.648766	0.722575
ENSMUSG00000041353	541.268	-0.496525	0.373321	-1.33002	0.183512	0.273274
ENSMUSG00000041354	564.118	-1.15276	0.389959	-2.9561	0.00311554	0.0107461
ENSMUSG00000041362	1783.7	-0.485448	0.282545	-1.71813	0.085773	0.151448
ENSMUSG00000041476	10412.6	-1.03894	0.484926	-2.14248	0.0321549	0.0694744
ENSMUSG00000041481	80.9925	-3.12763	1.02994	-3.03672	0.00239171	0.00863487
ENSMUSG00000041530	550.021	0.779508	0.462282	1.68622	0.0917539	0.160216
ENSMUSG00000041556	61121.2	0.427544	0.2916	1.4662	0.142595	0.225064
ENSMUSG00000041594	1383.29	-1.18511	0.473592	-2.50238	0.0123361	0.0324671
ENSMUSG00000041617	365.192	-1.8413	0.47625	-3.86626	0.000110519	0.000708039
ENSMUSG00000041653	169.933	-0.732208	0.628711	-1.16462	0.244174	0.338489
ENSMUSG00000041697	11397.2	0.919614	0.297373	3.09246	0.00198505	0.00744035
ENSMUSG00000041716	192.781	-0.198369	0.625296	-0.317239	0.751062	0.808254
ENSMUSG00000041731	366.359	3.32494	0.433021	7.67846	1.61013e-14	2.78476e-12
ENSMUSG00000041762	2296.57	-2.38266	0.316803	-7.52096	5.43748e-14	7.89957e-12
ENSMUSG00000041773	248.042	3.04203	0.467856	6.50208	7.92185e-11	5.2313e-09
ENSMUSG00000041777	803.591	-0.178049	0.328826	-0.54147	0.588184	0.670101
ENSMUSG00000041809	307.538	-1.48654	0.516789	-2.87648	0.00402135	0.0131938
ENSMUSG00000041881	6139.19	1.11765	0.414122	2.69884	0.00695807	0.0205317
ENSMUSG00000041912	528.038	-0.663844	0.555396	-1.19526	0.231984	0.325065
ENSMUSG00000041921	375.463	-0.154645	0.420888	-0.367427	0.713301	0.778224
ENSMUSG00000041930	176.312	-0.896307	0.486298	-1.84312	0.0653109	0.123098
ENSMUSG00000041939	655.131	-1.02588	0.359271	-2.85544	0.0042977	0.0139062
ENSMUSG00000041986	8414.88	-1.94887	0.467601	-4.1678	3.07551e-05	0.000246584
ENSMUSG00000042035	508.186	2.05863	0.456453	4.51006	6.48085e-06	6.78341e-05
ENSMUSG00000042050	1325.2	-0.488508	0.360333	-1.35571	0.175191	0.264241
ENSMUSG00000042133	2892.54	0.52567	0.36471	1.44134	0.149489	0.233927
ENSMUSG00000042190	20.0083	7.62928	1.9166	3.98064	6.87308e-05	0.00048378
ENSMUSG00000042210	598.058	-0.198075	0.376058	-0.526714	0.598392	0.679466
ENSMUSG00000042293	510.292	0.990335	0.441871	2.24123	0.025011	0.0568461
ENSMUSG00000042302	185.628	0.299615	0.435056	0.688683	0.491023	0.585034
ENSMUSG00000042306	212.065	1.82383	0.596481	3.05766	0.00223076	0.00820052
ENSMUSG00000042308	244.066	0.556496	0.567112	0.981281	0.326454	0.426044
ENSMUSG00000042312	10270.3	1.10179	0.410891	2.68147	0.00733	0.0214871
ENSMUSG00000042354	1753.13	1.76572	0.356057	4.95909	7.08242e-07	1.04143e-05
ENSMUSG00000042359	1385.95	-0.975249	0.342548	-2.84705	0.00441269	0.0141957
ENSMUSG00000042389	548.098	-1.10298	0.377142	-2.92456	0.00344939	0.0116759
ENSMUSG00000042390	755.03	0.837309	0.430704	1.94405	0.0518896	0.102537
ENSMUSG00000042417	94.436	-2.32864	0.692467	-3.36281	0.000771533	0.0033925
ENSMUSG00000042419	179.847	0.320085	0.501264	0.638556	0.523112	0.612424
ENSMUSG00000042423	360.181	0.605544	0.427594	1.41617	0.156727	0.242433
ENSMUSG00000042433	42.1615	-1.60088	0.988466	-1.61956	0.105326	0.17846
ENSMUSG00000042523	438.168	-1.07274	0.384506	-2.78992	0.00527203	0.0164079
ENSMUSG00000042524	166.025	2.08237	0.60943	3.41691	0.000633353	0.00286825
ENSMUSG00000042541	5821.26	1.6239	0.293086	5.54069	3.01287e-08	7.54739e-07
ENSMUSG00000042564	66.7886	0.406704	0.638355	0.637113	0.524051	0.613194
ENSMUSG00000042581	592.899	-1.80109	0.626663	-2.87409	0.00405189	0.013282
ENSMUSG00000042606	216.993	-0.479941	0.660363	-0.726783	0.467359	0.563936
ENSMUSG00000042616	1444.58	-1.46246	0.478801	-3.05443	0.00225492	0.00827259
ENSMUSG00000042625	1127.35	0.155984	0.464693	0.335671	0.737119	0.79774
ENSMUSG00000042647	94.5066	-2.1269	0.642456	-3.31058	0.000931024	0.00398759
ENSMUSG00000042662	45.989	-1.6553	0.933295	-1.77361	0.0761283	0.13818
ENSMUSG00000042675	3920.22	-0.70111	0.355828	-1.97036	0.0487967	0.097701
ENSMUSG00000042678	1590.62	-1.45213	0.377175	-3.85001	0.000118111	0.000752595
ENSMUSG00000042684	81.6876	-0.962328	0.669252	-1.43792	0.150458	0.234836
ENSMUSG00000042694	1424.88	-1.32842	0.355717	-3.7345	0.000188092	0.00107752
ENSMUSG00000042699	656.689	0.538346	0.414304	1.2994	0.193807	0.285676
ENSMUSG00000042707	142.315	-2.20065	2.21754	-0.992387	0.321009	0.419541
ENSMUSG00000042708	159.398	-2.88757	0.595401	-4.84979	1.23594e-06	1.66875e-05
ENSMUSG00000042737	1055.87	0.785082	0.405709	1.93509	0.0529796	0.104407
ENSMUSG00000042744	453.289	-0.893808	0.460072	-1.94276	0.0520457	0.10279
ENSMUSG00000042745	5697.53	1.12328	0.274202	4.09653	4.19386e-05	0.00031851
ENSMUSG00000042750	3141.19	-0.907773	0.418319	-2.17005	0.030003	0.0658262
ENSMUSG00000042751	210.882	-1.43035	0.461204	-3.10134	0.00192649	0.0072583
ENSMUSG00000042766	140.218	-1.2364	0.592013	-2.08847	0.0367557	0.0775241
ENSMUSG00000042797	468.946	-1.99964	0.468266	-4.27031	1.95201e-05	0.000172919
ENSMUSG00000042851	349.856	-0.665564	0.368287	-1.80719	0.070733	0.130341
ENSMUSG00000042854	198.005	0.625206	0.512729	1.21937	0.222705	0.31658
ENSMUSG00000042861	11071.4	-1.8631	0.4568	-4.07859	4.53094e-05	0.000338609
ENSMUSG00000042873	882.386	-1.30736	0.370766	-3.5261	0.000421734	0.00210404
ENSMUSG00000042903	56.1311	1.65894	0.871098	1.90443	0.0568542	0.110072
ENSMUSG00000043020	920.773	-2.00933	0.354884	-5.66192	1.49686e-08	4.22987e-07
ENSMUSG00000043165	52.563	-0.65433	0.744506	-0.878878	0.379468	0.477556
ENSMUSG00000043168	34.3289	-0.973365	1.05696	-0.920907	0.357099	0.455482
ENSMUSG00000043241	1228.04	0.440141	0.461679	0.953349	0.340413	0.439212
ENSMUSG00000043243	24.0161	0.682057	1.12056	0.608676	0.542739	0.630389
ENSMUSG00000043279	866.392	2.31404	0.543998	4.25376	2.10206e-05	0.000183086
ENSMUSG00000043295	31.6599	1.46676	0.876998	1.67248	0.0944306	0.163959
ENSMUSG00000043300	847.784	-1.348	0.711926	-1.89346	0.0582972	0.11197
ENSMUSG00000043301	39.9757	-3.63194	0.956747	-3.79613	0.000146972	0.000891203
ENSMUSG00000043311	132.936	1.79207	0.942093	1.90222	0.0571425	0.110512
ENSMUSG00000043329	25.953	0.927087	0.968009	0.957726	0.338201	0.43729
ENSMUSG00000043388	1042.39	-2.90454	0.350389	-8.28948	1.13746e-16	2.29515e-14
ENSMUSG00000043419	429.514	-1.30697	0.361339	-3.61703	0.000297998	0.0015618
ENSMUSG00000043498	46.1387	-1.79417	1.41026	-1.27223	0.203292	0.296054
ENSMUSG00000043518	174.926	-1.54071	0.594564	-2.59133	0.00956053	0.0265473
ENSMUSG00000043541	273.927	-1.90826	0.662699	-2.87953	0.00398269	0.0131144
ENSMUSG00000043557	135.591	-1.86038	0.700324	-2.65646	0.00789665	0.0228385
ENSMUSG00000043681	107.734	2.51629	0.714482	3.52184	0.000428566	0.00212644
ENSMUSG00000043773	99.6634	-0.745169	0.558764	-1.3336	0.182334	0.272189
ENSMUSG00000043833	16.0807	-1.42612	1.27157	-1.12154	0.262058	0.358087
ENSMUSG00000043843	88.8201	-3.22505	0.705704	-4.56997	4.87792e-06	5.36867e-05
ENSMUSG00000043850	2324.01	-1.9059	0.513037	-3.71493	0.000203259	0.00114278
ENSMUSG00000043903	93.5948	-0.309902	0.57452	-0.539411	0.589604	0.670935
ENSMUSG00000043923	127.508	-0.283078	0.647037	-0.437499	0.66175	0.734334
ENSMUSG00000043987	581.56	-0.228951	0.537053	-0.42631	0.669882	0.741834
ENSMUSG00000043991	1554.28	0.811548	0.393381	2.06301	0.0391121	0.0815471
ENSMUSG00000044017	1358.02	-2.68683	0.420432	-6.39065	1.65186e-10	9.67673e-09
ENSMUSG00000044042	268.101	-0.811405	0.485231	-1.6722	0.0944841	0.163959
ENSMUSG00000044068	367.978	0.0932258	0.511954	0.182098	0.855506	0.893129
ENSMUSG00000044080	76863.8	0.450708	0.397073	1.13508	0.256343	0.351335
ENSMUSG00000044145	140.641	1.14996	0.642971	1.78851	0.0736935	0.134432
ENSMUSG00000044164	251.011	-0.560989	0.468407	-1.19765	0.231053	0.324385
ENSMUSG00000044176	16.7972	2.79853	1.25439	2.23099	0.0256818	0.0578792
ENSMUSG00000044177	94.4287	1.68157	0.863771	1.94678	0.051561	0.102054
ENSMUSG00000044216	14.9418	0.464761	1.51307	0.307164	0.758718	0.814081
ENSMUSG00000044252	1724.38	-1.32227	0.281667	-4.69445	2.67322e-06	3.28011e-05
ENSMUSG00000044254	450.146	-2.50612	0.531596	-4.71433	2.42504e-06	3.02671e-05
ENSMUSG00000044328	1063	-0.273946	0.467589	-0.585871	0.557962	0.644362
ENSMUSG00000044330	1843.24	2.50025	0.383613	6.51764	7.14215e-11	4.80376e-09
ENSMUSG00000044364	306.731	-1.03398	0.610842	-1.69271	0.0905106	0.158426
ENSMUSG00000044365	398.711	-1.53201	0.400367	-3.82651	0.000129975	0.000808339
ENSMUSG00000044378	68.0547	-4.85425	0.967487	-5.01738	5.23803e-07	8.27153e-06
ENSMUSG00000044405	21.0892	7.70715	2.29585	3.35699	0.000787952	0.003448
ENSMUSG00000044429	12.8561	-3.39322	1.59908	-2.12198	0.0338393	0.0722967
ENSMUSG00000044469	202.584	-1.45062	0.441085	-3.28876	0.0010063	0.00426476
ENSMUSG00000044528	24.9812	-0.518748	1.56871	-0.330684	0.740883	0.801098
ENSMUSG00000044550	612.791	-0.66124	0.362383	-1.8247	0.0680466	0.126806
ENSMUSG00000044609	108.947	1.85082	0.531545	3.48197	0.000497748	0.002357
ENSMUSG00000044617	79.0256	1.46991	0.616405	2.38465	0.0170951	0.0417269
ENSMUSG00000044667	902.628	-1.25008	0.381846	-3.27379	0.00106116	0.00445051
ENSMUSG00000044676	1081.3	-0.815783	0.348066	-2.34376	0.0190904	0.045646
ENSMUSG00000044694	320.574	-1.65571	0.684634	-2.41839	0.0155894	0.0388315
ENSMUSG00000044703	28.2823	8.12747	1.96295	4.14043	3.46658e-05	0.000272524
ENSMUSG00000044712	60.624	1.36183	0.966592	1.4089	0.158865	0.245114
ENSMUSG00000044719	1597.45	-1.74961	0.419945	-4.16629	3.09598e-05	0.000247678
ENSMUSG00000044788	295.814	-0.320422	0.566416	-0.565702	0.571597	0.656974
ENSMUSG00000044816	1185.89	-0.836041	0.432157	-1.93458	0.0530424	0.104417
ENSMUSG00000044820	13.5576	1.59349	1.31168	1.21485	0.224424	0.317905
ENSMUSG00000044854	75.4742	0.975316	0.654053	1.49119	0.135912	0.216673
ENSMUSG00000044894	5904	1.96382	0.41845	4.69307	2.69135e-06	3.2832e-05
ENSMUSG00000044927	51.5454	-1.78912	0.72251	-2.47626	0.0132766	0.0344187
ENSMUSG00000044948	1424.18	-0.870257	0.332193	-2.61973	0.00879992	0.0249698
ENSMUSG00000044951	56.7536	-0.718642	0.779589	-0.921822	0.356622	0.455112
ENSMUSG00000045005	77.3296	1.54095	0.633016	2.4343	0.0149208	0.0376875
ENSMUSG00000045027	325.057	0.547128	0.490057	1.11646	0.264226	0.359831
ENSMUSG00000045031	363.085	-0.655082	0.470915	-1.39108	0.1642	0.251579
ENSMUSG00000045038	234.088	0.653883	0.425663	1.53615	0.124501	0.202775
ENSMUSG00000045039	1883.29	-0.940686	0.364889	-2.57801	0.0099372	0.0273838
ENSMUSG00000045104	486.463	0.253132	0.373975	0.67687	0.498489	0.591477
ENSMUSG00000045176	395.095	0.490363	0.381038	1.28691	0.198125	0.290629
ENSMUSG00000045193	5661.29	-0.814939	0.391473	-2.08173	0.0373675	0.0784955
ENSMUSG00000045215	89.2334	2.26022	1.0087	2.24072	0.0250442	0.0568859
ENSMUSG00000045251	345.458	-0.557671	0.374002	-1.49109	0.135938	0.216673
ENSMUSG00000045257	849.088	-0.0410262	0.485628	-0.0844807	0.932674	0.953949
ENSMUSG00000045259	119.904	-0.945773	0.600536	-1.57488	0.115284	0.191367
ENSMUSG00000045282	34.1639	0.755771	1.10115	0.686348	0.492493	0.586279
ENSMUSG00000045284	233.062	-2.25255	0.712125	-3.16315	0.00156074	0.00614118
ENSMUSG00000045316	573.108	0.308712	0.364567	0.846791	0.397111	0.495364
ENSMUSG00000045328	35.6216	1.56506	0.923153	1.69534	0.0900104	0.157627
ENSMUSG00000045382	99.9942	3.91256	1.07693	3.63305	0.000280087	0.00148291
ENSMUSG00000045435	1618.42	-0.682986	0.397788	-1.71696	0.0859867	0.151751
ENSMUSG00000045482	928.277	-0.164982	0.368529	-0.447678	0.654386	0.727626
ENSMUSG00000045502	13.5042	1.91593	2.22301	0.861865	0.388762	0.487395
ENSMUSG00000045515	463.752	1.39845	0.502533	2.78281	0.00538909	0.0166722
ENSMUSG00000045589	183.221	-1.90952	0.579273	-3.29641	0.000979298	0.00416001
ENSMUSG00000045608	58.9354	2.47535	1.27867	1.93588	0.052882	0.104271
ENSMUSG00000045624	1207.13	0.669121	0.503871	1.32796	0.184191	0.274061
ENSMUSG00000045625	39.9518	-1.80744	0.847623	-2.13236	0.0329773	0.0709559
ENSMUSG00000045672	254.318	0.988733	0.550546	1.79591	0.0725085	0.132938
ENSMUSG00000045725	1001.24	-0.333607	0.468848	-0.711547	0.476745	0.572599
ENSMUSG00000045752	1519.52	0.120518	0.303201	0.397485	0.69101	0.759765
ENSMUSG00000045795	339.059	0.0243477	0.454647	0.053553	0.957291	0.969301
ENSMUSG00000045886	365.865	0.939116	0.393118	2.38889	0.0168994	0.0412767
ENSMUSG00000045912	11.8388	0.458517	1.94549	0.235681	0.81368	0.859344
ENSMUSG00000045928	32.2659	-0.539052	1.44836	-0.372182	0.709758	0.775523
ENSMUSG00000045948	2052.31	0.731367	0.305363	2.39507	0.0166171	0.0407712
ENSMUSG00000045962	2235.45	0.960882	0.329154	2.91925	0.0035088	0.0118328
ENSMUSG00000045969	1190.29	-0.555233	0.335717	-1.65387	0.098154	0.168805
ENSMUSG00000045996	699.054	0.865989	0.339657	2.5496	0.0107848	0.029188
ENSMUSG00000046058	1151.33	-0.989662	0.388849	-2.5451	0.0109245	0.0294564
ENSMUSG00000046111	473.161	0.652507	0.365811	1.78373	0.0744681	0.135505
ENSMUSG00000046138	679.186	-0.206028	0.364512	-0.565216	0.571927	0.657146
ENSMUSG00000046229	1245.59	1.55915	0.425071	3.66798	0.000244474	0.00132725
ENSMUSG00000046242	285.005	-1.09477	0.543472	-2.0144	0.0439679	0.0897144
ENSMUSG00000046330	6870.98	1.65013	0.433552	3.80606	0.000141195	0.000866253
ENSMUSG00000046334	15.1574	1.54165	1.37938	1.11764	0.263721	0.359278
ENSMUSG00000046364	2126.89	2.19484	0.438854	5.0013	5.69443e-07	8.68998e-06
ENSMUSG00000046378	34.6812	-1.44302	0.911942	-1.58236	0.113568	0.18921
ENSMUSG00000046388	12.8886	3.99936	1.72436	2.31933	0.0203769	0.0481958
ENSMUSG00000046402	25015.4	3.36323	0.4021	8.36417	6.05397e-17	1.29341e-14
ENSMUSG00000046447	798.477	-0.811483	0.614325	-1.32093	0.186523	0.276873
ENSMUSG00000046516	917.265	0.994271	0.340791	2.91754	0.00352805	0.0118647
ENSMUSG00000046532	52.141	-2.41283	1.13394	-2.12783	0.0333512	0.0715484
ENSMUSG00000046567	319.192	-1.19382	0.487865	-2.44704	0.0144035	0.0366856
ENSMUSG00000046573	549.468	-0.52251	0.46876	-1.11466	0.264995	0.360203
ENSMUSG00000046574	332.753	0.282253	0.394948	0.714658	0.47482	0.570476
ENSMUSG00000046688	1006.57	-1.39322	0.489409	-2.84674	0.00441688	0.0141965
ENSMUSG00000046707	573.415	0.37217	0.352615	1.05546	0.291216	0.387953
ENSMUSG00000046718	2700.64	0.29774	0.3986	0.746964	0.455086	0.551692
ENSMUSG00000046805	292.439	3.72439	0.488071	7.63084	2.33228e-14	3.52952e-12
ENSMUSG00000046806	140.811	0.0548987	0.472035	0.116302	0.907413	0.933517
ENSMUSG00000046873	360.498	-2.01649	0.362417	-5.56401	2.63638e-08	7.10614e-07
ENSMUSG00000046876	716.299	0.466929	0.362943	1.28651	0.198266	0.290715
ENSMUSG00000046961	496.648	-1.52515	0.466076	-3.27231	0.00106672	0.00445979
ENSMUSG00000047021	314.67	-1.35048	0.463497	-2.91367	0.0035721	0.0119907
ENSMUSG00000047044	822.778	-0.576153	0.546652	-1.05397	0.291898	0.388484
ENSMUSG00000047084	1773.59	-0.642463	0.441521	-1.45511	0.145638	0.229184
ENSMUSG00000047094	293.032	-2.06653	0.4994	-4.13802	3.50317e-05	0.000274806
ENSMUSG00000047193	1437.32	-1.04567	0.38931	-2.68596	0.00723217	0.021269
ENSMUSG00000047228	139.845	-1.83741	0.473161	-3.88326	0.000103066	0.00066965
ENSMUSG00000047238	499.694	-0.466964	0.585612	-0.797395	0.425222	0.522465
ENSMUSG00000047284	795.408	-0.37273	0.375348	-0.993024	0.320698	0.419437
ENSMUSG00000047379	962.875	-1.38382	0.505396	-2.73809	0.00617977	0.0186156
ENSMUSG00000047394	422.816	-1.39045	0.45823	-3.03439	0.00241021	0.00868984
ENSMUSG00000047419	8.48441	3.38245	2.16095	1.56526	0.117522	0.194617
ENSMUSG00000047428	2405.17	-1.93193	0.518969	-3.72263	0.000197158	0.00111887
ENSMUSG00000047473	290.06	-0.56077	0.501151	-1.11896	0.263156	0.359182
ENSMUSG00000047586	13.5082	-0.609216	1.29906	-0.468966	0.639094	0.714212
ENSMUSG00000047604	468.47	-1.39279	0.371626	-3.74783	0.000178368	0.00103309
ENSMUSG00000047636	520.803	-3.24124	0.743775	-4.35782	1.31362e-05	0.000124177
ENSMUSG00000047669	717.9	-1.3824	0.378202	-3.65518	0.000257003	0.00137878
ENSMUSG00000047675	5563.57	2.04587	0.379831	5.38627	7.19344e-08	1.54008e-06
ENSMUSG00000047712	521.406	-1.15873	0.426298	-2.71812	0.00656534	0.0195774
ENSMUSG00000047721	1748.91	2.12079	0.373164	5.68326	1.32149e-08	3.83971e-07
ENSMUSG00000047747	926.016	-1.36759	0.308873	-4.42768	9.5254e-06	9.35033e-05
ENSMUSG00000047798	51.9608	7.52978	1.86806	4.0308	5.55862e-05	0.000402169
ENSMUSG00000047843	133.597	1.25736	0.498664	2.52146	0.0116869	0.0311195
ENSMUSG00000047844	800.928	-0.211889	0.33718	-0.628416	0.529731	0.618644
ENSMUSG00000047854	15.918	3.31208	2.71419	1.22028	0.222357	0.316238
ENSMUSG00000047880	27.972	1.515	1.12946	1.34135	0.179806	0.269301
ENSMUSG00000047888	2131.03	0.0974312	0.343787	0.283406	0.776866	0.829876
ENSMUSG00000047905	554.502	1.27851	0.503325	2.54013	0.011081	0.0298121
ENSMUSG00000047909	234.194	-0.537089	0.506089	-1.06126	0.288574	0.385331
ENSMUSG00000047935	50.2364	-0.92834	0.830312	-1.11806	0.263541	0.359278
ENSMUSG00000047986	472.537	-0.878239	0.342389	-2.56503	0.0103165	0.0281304
ENSMUSG00000048000	922.626	0.0678153	0.371655	0.182469	0.855215	0.893082
ENSMUSG00000048003	12.6998	2.95144	2.07989	1.41904	0.155889	0.241342
ENSMUSG00000048029	417.069	-1.5692	0.579941	-2.70579	0.00681419	0.0201743
ENSMUSG00000048040	1277.14	-2.17993	0.413183	-5.27595	1.32073e-07	2.60701e-06
ENSMUSG00000048065	177.187	-0.934403	0.623695	-1.49817	0.134088	0.214258
ENSMUSG00000048078	1852.61	0.788502	0.358358	2.20032	0.0277841	0.0614941
ENSMUSG00000048096	1404.2	-0.820479	0.314576	-2.6082	0.00910191	0.0256464
ENSMUSG00000048118	1009.61	-0.112063	0.384234	-0.291654	0.770551	0.824342
ENSMUSG00000048154	1040.32	-0.383059	0.392714	-0.975415	0.329354	0.428905
ENSMUSG00000048163	35.9832	8.47634	1.78841	4.7396	2.1414e-06	2.72834e-05
ENSMUSG00000048175	2100.72	-1.5697	0.388633	-4.03902	5.36755e-05	0.000390504
ENSMUSG00000048222	711.34	-0.401187	0.347407	-1.1548	0.248171	0.343112
ENSMUSG00000048347	100.834	-1.84064	0.775048	-2.37487	0.0175552	0.0425922
ENSMUSG00000048349	23.679	0.778682	1.1199	0.695311	0.48686	0.581224
ENSMUSG00000048355	386.569	-1.96604	0.487837	-4.03012	5.57478e-05	0.000402537
ENSMUSG00000048416	2333.47	-1.58049	0.443221	-3.56591	0.000362595	0.00183931
ENSMUSG00000048442	1424.8	-0.86556	0.472832	-1.83059	0.0671619	0.12535
ENSMUSG00000048481	52.4943	0.503351	0.925227	0.54403	0.586421	0.668722
ENSMUSG00000048482	7306.62	-1.78768	0.371093	-4.81733	1.4549e-06	1.9267e-05
ENSMUSG00000048497	1045.31	-1.52861	0.304732	-5.01625	5.26899e-07	8.27445e-06
ENSMUSG00000048562	5.03209	5.64641	2.93159	1.92606	0.0540972	0.106091
ENSMUSG00000048603	15.1006	2.54587	1.46507	1.7377	0.0822628	0.146317
ENSMUSG00000048644	451.696	-1.30941	0.407699	-3.21171	0.00131948	0.00536659
ENSMUSG00000048655	10.9819	-5.08653	2.15055	-2.36522	0.0180193	0.0435436
ENSMUSG00000048699	33.2311	-7.01079	1.43442	-4.88756	1.02095e-06	1.41531e-05
ENSMUSG00000048701	893.943	-0.435913	0.461162	-0.945248	0.344532	0.443293
ENSMUSG00000048706	1806.31	-1.27685	0.410273	-3.11219	0.00185704	0.00705519
ENSMUSG00000048731	71.2575	0.367235	0.628426	0.584373	0.558969	0.64532
ENSMUSG00000048752	122.782	0.393182	0.717952	0.547644	0.583937	0.666727
ENSMUSG00000048756	713.753	0.974879	0.377738	2.58083	0.00985622	0.0271813
ENSMUSG00000048782	745.225	-1.47135	0.374375	-3.93016	8.48908e-05	0.000569914
ENSMUSG00000048827	23.4776	1.83695	1.29661	1.41673	0.156562	0.24228
ENSMUSG00000048878	694.702	0.0536761	0.360131	0.149046	0.881517	0.912157
ENSMUSG00000048895	30.7038	1.16791	1.00169	1.16594	0.243639	0.337876
ENSMUSG00000048915	639.968	0.473659	0.407899	1.16122	0.245554	0.340142
ENSMUSG00000048967	211.754	0.530602	0.464906	1.14131	0.253741	0.34869
ENSMUSG00000048978	278.639	-2.10723	0.551209	-3.82293	0.000131876	0.000817361
ENSMUSG00000049086	613.281	0.0254868	0.370999	0.0686978	0.94523	0.961377
ENSMUSG00000049154	3504.9	-0.426755	0.542395	-0.786798	0.4314	0.528447
ENSMUSG00000049231	133.527	1.23281	0.580923	2.12215	0.0338252	0.0722967
ENSMUSG00000049246	30.7851	2.06757	0.89154	2.3191	0.0203897	0.0481958
ENSMUSG00000049281	160.817	-2.04537	0.518317	-3.94618	7.9408e-05	0.000541107
ENSMUSG00000049288	69.8443	0.964954	0.841715	1.14641	0.251624	0.346698
ENSMUSG00000049300	363.908	-0.19455	0.368668	-0.527711	0.5977	0.679026
ENSMUSG00000049357	10.0557	0.029086	1.92729	0.0150916	0.987959	0.989867
ENSMUSG00000049420	383.636	-2.23557	0.426319	-5.24389	1.57229e-07	3.02146e-06
ENSMUSG00000049422	11111.3	0.0376211	0.342679	0.109785	0.91258	0.937604
ENSMUSG00000049530	449.662	-1.27801	0.800648	-1.59622	0.110439	0.185102
ENSMUSG00000049532	1522.59	0.105125	0.293407	0.35829	0.720126	0.783051
ENSMUSG00000049555	2288.88	-1.20029	0.448583	-2.67573	0.00745664	0.021753
ENSMUSG00000049560	16.0409	2.2863	1.8875	1.21128	0.225788	0.319339
ENSMUSG00000049571	933.63	-1.54298	0.318356	-4.84671	1.25527e-06	1.68858e-05
ENSMUSG00000049649	122.546	-1.93345	0.608696	-3.17637	0.00149129	0.005939
ENSMUSG00000049658	985.585	0.251628	0.351604	0.715657	0.474203	0.570181
ENSMUSG00000049659	2946.61	-0.878196	0.396478	-2.21499	0.0267604	0.059592
ENSMUSG00000049685	3837.52	-2.60744	0.445062	-5.85859	4.668e-09	1.61468e-07
[truncated: 1,633 more rows]

## Sheet: B_sigGenes in SC
ensembl_gene_id	baseMean	log2FoldChange	lfcSE	stat	pvalue	padj
ENSMUSG00000000142	224.935	1.27129	0.484631	2.62322	0.00871028	0.0247735
ENSMUSG00000000374	798.019	1.30294	0.388275	3.35571	0.000791625	0.00345991
ENSMUSG00000000628	2439.73	2.63074	0.464689	5.6613	1.5e-08	4.23e-07
ENSMUSG00000000682	160.92	5.10802	2.01479	2.53526	0.0112364	0.0301145
ENSMUSG00000001020	84.0271	3.61972	0.730392	4.95587	7.2e-07	1.05e-05
ENSMUSG00000001025	8985.44	4.19182	0.340708	12.3033	8.7e-35	1.58e-31
ENSMUSG00000001134	451.6	1.22592	0.464742	2.63785	0.00834344	0.0239742
ENSMUSG00000001348	64.4498	9.31229	3.39509	2.74287	0.00609052	0.0184186
ENSMUSG00000001521	1654.74	1.25087	0.382064	3.27398	0.00106043	0.00445051
ENSMUSG00000002250	142.137	1.58842	0.621789	2.5546	0.0106309	0.0288144
ENSMUSG00000002489	371.408	2.15785	0.528019	4.08669	4.38e-05	0.000329032
ENSMUSG00000002580	1496.47	1.24746	0.322952	3.86267	0.000112155	0.000715898
ENSMUSG00000003271	42.201	3.99672	0.938252	4.25975	2.05e-05	0.000179976
ENSMUSG00000003282	36.7795	4.43609	1.09854	4.03818	5.39e-05	0.000390504
ENSMUSG00000003360	285.697	1.39815	0.521475	2.68114	0.00733714	0.0214907
ENSMUSG00000003970	8248.51	1.80282	0.364722	4.943	7.69e-07	1.11e-05
ENSMUSG00000004317	322.115	1.05311	0.382336	2.75441	0.00587987	0.0179008
ENSMUSG00000004610	482.518	1.01895	0.377525	2.69902	0.00695442	0.0205317
ENSMUSG00000004730	147.625	5.77572	0.972228	5.94071	2.84e-09	1.05e-07
ENSMUSG00000006333	8372.9	1.57521	0.293605	5.36507	8.09e-08	1.66e-06
ENSMUSG00000006360	557.603	3.5603	0.375388	9.48433	2.44e-21	8.86e-19
ENSMUSG00000006412	2774.1	1.24262	0.297697	4.17409	2.99e-05	0.00024147
ENSMUSG00000008575	3446.04	1.43108	0.420751	3.40125	0.000670796	0.00299304
ENSMUSG00000008683	2515.15	1.88535	0.382193	4.93297	8.1e-07	1.17e-05
ENSMUSG00000009876	1166.74	2.75109	0.416047	6.61245	3.78e-11	2.92e-09
ENSMUSG00000009927	7575.41	1.86413	0.394493	4.72538	2.3e-06	2.88e-05
ENSMUSG00000010376	5316.53	1.31395	0.360417	3.64564	0.000266732	0.00142466
ENSMUSG00000010406	3661.41	1.95428	0.356148	5.48726	4.08e-08	1e-06
ENSMUSG00000010476	247.875	1.60408	0.564305	2.84257	0.00447515	0.0143584
ENSMUSG00000010760	71.6177	2.70048	0.79215	3.40905	0.000651907	0.00293855
ENSMUSG00000011257	360.438	1.1935	0.397899	2.99951	0.00270415	0.00957258
ENSMUSG00000013076	3178.06	2.6148	0.396365	6.59694	4.2e-11	3.11e-09
ENSMUSG00000014294	6266.15	1.10391	0.354304	3.11572	0.00183495	0.00697856
ENSMUSG00000014303	297.358	1.62301	0.512913	3.1643	0.00155458	0.00613722
ENSMUSG00000014778	111.519	2.36887	0.712162	3.32631	0.000880055	0.00380972
ENSMUSG00000015143	985.653	2.0685	0.436491	4.73894	2.15e-06	2.73e-05
ENSMUSG00000015305	378.306	1.47218	0.531521	2.76976	0.00560984	0.0172523
ENSMUSG00000015312	3581.22	2.41641	0.349679	6.91036	4.83e-12	5.49e-10
ENSMUSG00000015947	167.298	10.6903	1.58697	6.73628	1.62e-11	1.41e-09
ENSMUSG00000016181	149.665	1.57876	0.592243	2.66572	0.00768226	0.0222859
ENSMUSG00000016427	4503.8	1.58131	0.335889	4.70784	2.5e-06	3.11e-05
ENSMUSG00000016833	891.217	1.47844	0.345495	4.2792	1.88e-05	0.000167378
ENSMUSG00000017404	3664.43	1.9573	0.340908	5.74143	9.39e-09	2.91e-07
ENSMUSG00000017723	8206.29	1.817	0.280467	6.47849	9.26e-11	5.8e-09
ENSMUSG00000018474	437.898	1.28087	0.484741	2.64239	0.00823226	0.023711
ENSMUSG00000018923	492.558	1.61758	0.541656	2.98636	0.00282317	0.00986885
ENSMUSG00000018927	381.675	11.8776	2.33685	5.08276	3.72e-07	6.27e-06
ENSMUSG00000018930	164.866	5.24652	1.90805	2.74968	0.0059654	0.0181452
ENSMUSG00000019088	196.909	2.30693	0.674725	3.41907	0.000628363	0.00285277
ENSMUSG00000019122	95.9583	4.5303	0.838629	5.40202	6.59e-08	1.46e-06
ENSMUSG00000019158	1602.61	1.59006	0.302334	5.2593	1.45e-07	2.84e-06
ENSMUSG00000019362	4154.17	1.57322	0.404165	3.89252	9.92e-05	0.000649243
ENSMUSG00000019789	399.746	2.08774	0.405913	5.14333	2.7e-07	4.9e-06
ENSMUSG00000019820	1433.62	1.26934	0.440165	2.88378	0.00392937	0.0129741
ENSMUSG00000019987	168.845	4.77209	0.731331	6.52521	6.79e-11	4.65e-09
ENSMUSG00000020018	179.592	1.24601	0.469935	2.65144	0.00801486	0.0231399
ENSMUSG00000020075	1392.5	2.0555	0.516869	3.97682	6.98e-05	0.000489702
ENSMUSG00000020108	1831.66	1.34371	0.341811	3.93115	8.45e-05	0.000568614
ENSMUSG00000020163	6027.01	1.16949	0.407482	2.87003	0.00410432	0.0134175
ENSMUSG00000020205	1824.26	1.49367	0.39172	3.81311	0.000137226	0.00084619
ENSMUSG00000020219	3939.67	1.35922	0.305217	4.4533	8.46e-06	8.6e-05
ENSMUSG00000020224	1070.21	1.64298	0.397171	4.1367	3.52e-05	0.000275789
ENSMUSG00000020460	4704.76	1.42266	0.305141	4.66229	3.13e-06	3.71e-05
ENSMUSG00000020627	59.3662	5.41786	1.089	4.97509	6.52e-07	9.75e-06
ENSMUSG00000020736	1395.94	1.39658	0.330936	4.22008	2.44e-05	0.000205796
ENSMUSG00000020821	345.007	2.03584	0.686136	2.96711	0.0030061	0.0104294
ENSMUSG00000021040	1514.34	1.05973	0.402749	2.63123	0.00850765	0.0243497
ENSMUSG00000021061	1594.77	2.04855	0.541203	3.78518	0.0001536	0.000916054
ENSMUSG00000021097	590.993	1.66354	0.474476	3.50606	0.000454787	0.00222382
ENSMUSG00000021509	18.5648	7.51106	1.93141	3.8889	0.0001007	0.00065781
ENSMUSG00000021606	3098.47	1.06385	0.336744	3.15922	0.00158194	0.0061883
ENSMUSG00000021669	374.566	1.87944	0.489686	3.83804	0.000124019	0.000779306
ENSMUSG00000021886	72.6579	9.48367	1.58731	5.97467	2.31e-09	8.81e-08
ENSMUSG00000022014	26.9586	8.05775	1.79951	4.47773	7.54e-06	7.81e-05
ENSMUSG00000022209	29.1893	8.16606	1.95395	4.17927	2.92e-05	0.000237092
ENSMUSG00000022217	248.957	2.01548	0.547726	3.67973	0.000233485	0.00127906
ENSMUSG00000022255	3050.33	1.04133	0.401087	2.59628	0.00942396	0.0262697
ENSMUSG00000022311	40.1761	7.13014	2.23258	3.19368	0.00140474	0.00564381
ENSMUSG00000022438	69.2567	4.10535	0.751983	5.45937	4.78e-08	1.14e-06
ENSMUSG00000022450	4562.71	1.60865	0.406204	3.96022	7.49e-05	0.00051658
ENSMUSG00000022528	1077.85	2.75434	0.428933	6.42139	1.35e-10	8.04e-09
ENSMUSG00000022623	42.4691	6.30306	1.37385	4.58788	4.48e-06	5.03e-05
ENSMUSG00000022708	10876.2	1.64687	0.422481	3.8981	9.7e-05	0.000635605
ENSMUSG00000022995	3427.17	1.11616	0.368174	3.03162	0.00243248	0.00875598
ENSMUSG00000023020	2558.27	1.38417	0.315	4.39419	1.11e-05	0.000106273
ENSMUSG00000023052	15.6757	4.88278	1.82411	2.67681	0.00743276	0.0217182
ENSMUSG00000023067	8812.48	3.08731	0.327039	9.44019	3.72e-21	1.23e-18
ENSMUSG00000023393	111.583	6.12708	1.21003	5.06358	4.11e-07	6.76e-06
ENSMUSG00000023939	1937.68	1.33646	0.37976	3.51923	0.000432794	0.00214196
ENSMUSG00000023992	231.273	7.06368	0.829917	8.51131	1.72e-17	4.16e-15
ENSMUSG00000024030	265.818	1.49936	0.493594	3.03765	0.00238432	0.00861677
ENSMUSG00000024096	2977.91	1.69064	0.336097	5.03022	4.9e-07	7.8e-06
ENSMUSG00000024205	145.294	1.45204	0.572434	2.53661	0.0111931	0.0300468
ENSMUSG00000024208	3330.42	1.79435	0.321097	5.58818	2.29e-08	6.27e-07
ENSMUSG00000024346	2403.24	2.10271	0.336168	6.25493	3.98e-10	1.95e-08
ENSMUSG00000024397	295.555	11.5103	1.60518	7.17075	7.46e-13	9.34e-11
ENSMUSG00000024446	1043.93	1.01575	0.346494	2.9315	0.00337331	0.0114611
ENSMUSG00000024456	835.487	1.62442	0.43147	3.76486	0.00016664	0.000980933
ENSMUSG00000024610	510.957	4.13661	0.871247	4.74792	2.06e-06	2.63e-05
ENSMUSG00000024639	1323.01	1.18571	0.361528	3.27972	0.0010391	0.00438073
ENSMUSG00000024672	306.754	6.85436	0.844397	8.11746	4.76e-16	9.1e-14
ENSMUSG00000024675	49.6803	8.93881	1.66055	5.38304	7.32e-08	1.56e-06
ENSMUSG00000024679	144.952	5.32175	0.934765	5.69314	1.25e-08	3.65e-07
ENSMUSG00000024691	74.4848	9.52209	1.58995	5.98894	2.11e-09	8.25e-08
ENSMUSG00000024737	81.6246	4.118	1.14623	3.59264	0.00032734	0.0016745
ENSMUSG00000024846	7174.79	1.05105	0.300005	3.50344	0.000459287	0.00223218
ENSMUSG00000024863	20.3611	7.65486	2.63319	2.90706	0.00364842	0.0122017
ENSMUSG00000024925	1084.13	1.23574	0.412519	2.9956	0.00273903	0.00963036
ENSMUSG00000025204	3946.95	1.23723	0.277194	4.46341	8.07e-06	8.3e-05
ENSMUSG00000025255	350.219	1.73186	0.618982	2.79791	0.00514341	0.016132
ENSMUSG00000025290	3163.62	1.59283	0.418892	3.80247	0.000143261	0.000874494
ENSMUSG00000025352	246.103	1.58686	0.475368	3.33817	0.000843318	0.00365942
ENSMUSG00000025362	2888.24	2.19483	0.364259	6.02546	1.69e-09	6.96e-08
ENSMUSG00000025481	280.788	2.47253	0.583596	4.23671	2.27e-05	0.000193834
ENSMUSG00000025508	5717.64	1.86975	0.300973	6.21236	5.22e-10	2.46e-08
ENSMUSG00000025860	661.564	1.12947	0.357788	3.15681	0.00159507	0.00622267
ENSMUSG00000025898	666.832	1.41049	0.463796	3.04119	0.00235642	0.00857568
ENSMUSG00000025967	2951.69	1.06187	0.306312	3.46662	0.000527049	0.00247318
ENSMUSG00000026176	321.614	1.60385	0.63457	2.52746	0.0114892	0.0307055
ENSMUSG00000026358	37.9152	4.37681	1.52338	2.8731	0.00406471	0.0133
ENSMUSG00000026385	7819.04	2.67797	0.35082	7.63347	2.29e-14	3.53e-12
ENSMUSG00000026395	63.3959	5.91255	1.20332	4.91352	8.95e-07	1.27e-05
ENSMUSG00000026643	516.281	1.56776	0.436373	3.59272	0.000327249	0.0016745
ENSMUSG00000026656	73.9436	7.09614	1.23992	5.72309	1.05e-08	3.22e-07
ENSMUSG00000026712	34.256	5.93945	1.52053	3.90618	9.38e-05	0.000619202
ENSMUSG00000026883	794.891	1.28486	0.480554	2.67372	0.0075016	0.0218491
ENSMUSG00000027012	2411.38	1.31706	0.411917	3.1974	0.00138671	0.00558372
ENSMUSG00000027133	3985.79	1.01121	0.330776	3.05707	0.00223512	0.00820824
ENSMUSG00000027242	52.11	2.2799	0.759921	3.00018	0.0026982	0.00956082
ENSMUSG00000027304	1637.87	1.14458	0.393976	2.90522	0.00367	0.0122513
ENSMUSG00000027349	958.763	1.16947	0.336486	3.47553	0.000509846	0.00239865
ENSMUSG00000027364	126.019	2.12362	0.569763	3.72721	0.000193615	0.00110048
ENSMUSG00000027422	3811.41	1.7062	0.459258	3.71512	0.000203106	0.00114278
ENSMUSG00000027966	468.862	1.35613	0.540174	2.51055	0.0120544	0.0318876
ENSMUSG00000027968	1043.27	1.15403	0.366675	3.14727	0.001648	0.00639482
ENSMUSG00000028062	2341.46	1.37741	0.303449	4.53918	5.65e-06	6e-05
ENSMUSG00000028609	1120.65	1.30097	0.331117	3.92904	8.53e-05	0.00057152
ENSMUSG00000028648	2700.74	1.12205	0.327504	3.42606	0.000612408	0.0027873
ENSMUSG00000028771	438.429	1.28172	0.38548	3.32499	0.000884224	0.00382322
ENSMUSG00000028936	1606.66	1.25336	0.330754	3.78942	0.000151	0.000906214
ENSMUSG00000028964	6055.74	1.05508	0.271846	3.88118	0.000103951	0.000672993
ENSMUSG00000028996	351.186	3.94669	0.559559	7.05322	1.75e-12	2.12e-10
ENSMUSG00000029062	2504.99	1.10159	0.393829	2.79713	0.00515585	0.0161571
ENSMUSG00000029254	33.7157	8.3774	1.90396	4.39998	1.08e-05	0.000104024
ENSMUSG00000029373	1055.84	5.97931	0.618401	9.66898	4.08e-22	1.85e-19
ENSMUSG00000029406	117.578	1.31194	0.564357	2.32467	0.0200896	0.0476898
ENSMUSG00000029614	4056.11	1.85408	0.387878	4.78005	1.75e-06	2.27e-05
ENSMUSG00000029623	2854.56	2.03655	0.310491	6.55914	5.41e-11	3.85e-09
ENSMUSG00000030034	635.099	1.01408	0.394021	2.57368	0.0100624	0.0276242
ENSMUSG00000030122	1069.07	2.08114	0.584694	3.55937	0.000371742	0.00187784
ENSMUSG00000030126	410.928	1.16077	0.480673	2.41488	0.0157404	0.0390405
ENSMUSG00000030144	80.9418	4.88227	1.08883	4.48395	7.33e-06	7.6e-05
ENSMUSG00000030157	50.6912	2.72593	1.06979	2.5481	0.0108311	0.0292697
ENSMUSG00000030188	304.811	1.13455	0.438603	2.58673	0.00968904	0.0268098
ENSMUSG00000030256	856.478	2.08898	0.37626	5.55196	2.82e-08	7.38e-07
ENSMUSG00000030257	719.026	1.04017	0.348966	2.98071	0.00287577	0.0100397
ENSMUSG00000030432	3000.98	1.84308	0.512705	3.59482	0.000324613	0.00166996
ENSMUSG00000030538	3051.51	1.51133	0.287789	5.25151	1.51e-07	2.94e-06
ENSMUSG00000030551	318.994	2.64107	0.46216	5.71461	1.1e-08	3.3e-07
ENSMUSG00000030579	493.874	5.899	1.49739	3.93951	8.16e-05	0.000554283
ENSMUSG00000030587	530.03	2.58397	0.412712	6.26096	3.83e-10	1.91e-08
ENSMUSG00000030707	98.3763	4.94351	0.889023	5.56061	2.69e-08	7.13e-07
ENSMUSG00000030738	4391.15	1.54719	0.380893	4.06201	4.87e-05	0.000359893
ENSMUSG00000030786	70.0252	5.89519	1.14715	5.13898	2.76e-07	4.97e-06
ENSMUSG00000030789	15.5501	7.26702	2.72098	2.67074	0.00756849	0.0220187
ENSMUSG00000030844	86.4297	3.36453	0.827045	4.06814	4.74e-05	0.000351987
ENSMUSG00000030847	2695.54	2.70262	0.445536	6.06598	1.31e-09	5.54e-08
ENSMUSG00000030921	141.058	3.50728	0.747471	4.6922	2.7e-06	3.28e-05
ENSMUSG00000031107	279.583	1.65929	0.560837	2.9586	0.00309039	0.0106695
ENSMUSG00000031245	835.176	1.24611	0.446949	2.78803	0.00530296	0.0164618
ENSMUSG00000031370	1118.77	1.22696	0.358919	3.41848	0.000629721	0.00285536
ENSMUSG00000031386	1371.33	1.15807	0.465282	2.48896	0.0128117	0.0335245
ENSMUSG00000031523	277.148	1.90613	0.471815	4.04	5.35e-05	0.000389827
ENSMUSG00000031762	496.364	1.31771	0.541199	2.4348	0.0148998	0.0376875
ENSMUSG00000031938	783.151	2.38465	0.442351	5.39085	7.01e-08	1.52e-06
ENSMUSG00000032009	704.081	1.23017	0.41842	2.94003	0.00328184	0.0111713
ENSMUSG00000032330	6464.62	1.17826	0.342661	3.43855	0.000584839	0.00269586
ENSMUSG00000032607	143.75	1.24545	0.538498	2.31283	0.0207321	0.0488005
ENSMUSG00000032640	492.858	1.12832	0.419724	2.68824	0.00718306	0.0211417
ENSMUSG00000032741	356.56	1.58352	0.452169	3.50206	0.000461667	0.00223272
ENSMUSG00000032803	1675.17	1.18744	0.366231	3.24233	0.00118555	0.00487646
ENSMUSG00000033020	2848.44	1.50943	0.370183	4.07752	4.55e-05	0.00033947
ENSMUSG00000033036	27.742	3.06823	0.992115	3.09261	0.00198403	0.00744035
ENSMUSG00000033220	100.85	8.50036	1.69734	5.00804	5.5e-07	8.5e-06
ENSMUSG00000033307	23509.5	1.14913	0.442124	2.5991	0.00934673	0.0261536
ENSMUSG00000033420	279.21	2.76937	0.49974	5.54162	3e-08	7.55e-07
ENSMUSG00000033467	95.8953	1.81472	0.596918	3.04015	0.00236461	0.00858837
ENSMUSG00000033720	335.917	1.9939	0.649531	3.06975	0.00214238	0.00790763
ENSMUSG00000033751	438.555	1.11872	0.351691	3.18099	0.00146775	0.00586453
ENSMUSG00000033938	4538.04	1.4317	0.373546	3.83271	0.000126737	0.000793636
ENSMUSG00000034101	1138.25	1.88652	0.43896	4.29769	1.73e-05	0.000156315
ENSMUSG00000034127	9571.12	1.92758	0.295144	6.53099	6.53e-11	4.56e-09
ENSMUSG00000034192	751.254	1.03456	0.367043	2.81862	0.00482301	0.0152855
ENSMUSG00000034892	5704.94	2.05748	0.485377	4.23892	2.25e-05	0.000192847
ENSMUSG00000034993	1493.61	2.50732	0.466177	5.37847	7.51e-08	1.59e-06
ENSMUSG00000035021	550.846	1.28242	0.466679	2.74796	0.00599668	0.0181855
ENSMUSG00000035042	71.7738	9.47052	1.66022	5.70439	1.17e-08	3.45e-07
ENSMUSG00000035048	1640.91	1.65206	0.434263	3.80429	0.000142213	0.000869556
ENSMUSG00000035202	77948.2	1.99633	0.626109	3.18848	0.00143024	0.00572098
ENSMUSG00000035352	567.985	4.89279	0.729798	6.7043	2.02e-11	1.71e-09
ENSMUSG00000035649	613.536	1.38559	0.367768	3.76756	0.000164848	0.000975085
ENSMUSG00000035674	4790.59	1.29788	0.34602	3.7509	0.000176203	0.00102502
ENSMUSG00000036053	611.827	2.72997	0.408033	6.69056	2.22e-11	1.84e-09
ENSMUSG00000036199	6473.84	1.11655	0.367422	3.03889	0.00237455	0.00859684
ENSMUSG00000036231	1898.3	2.69367	0.399622	6.74054	1.58e-11	1.4e-09
ENSMUSG00000036305	431.87	2.44767	0.527506	4.64008	3.48e-06	4.02e-05
ENSMUSG00000036372	2954.21	1.21642	0.415087	2.93053	0.00338387	0.0114862
ENSMUSG00000036504	207.371	1.25318	0.441851	2.8362	0.00456541	0.0146214
ENSMUSG00000036594	171.983	4.53311	1.92156	2.35907	0.0183206	0.0441542
ENSMUSG00000036617	692.075	1.4434	0.380375	3.79467	0.000147842	0.00089345
ENSMUSG00000036820	657.646	1.17659	0.413194	2.84755	0.00440576	0.0141933
ENSMUSG00000036887	849.046	5.48352	2.09992	2.6113	0.00901988	0.0254349
ENSMUSG00000036896	1046.07	6.79827	1.30745	5.19965	2e-07	3.78e-06
ENSMUSG00000036905	1298.82	2.6152	0.531062	4.92448	8.46e-07	1.21e-05
ENSMUSG00000037111	279.898	1.46185	0.465092	3.14314	0.00167147	0.00646515
ENSMUSG00000037416	611.056	1.08091	0.385753	2.80209	0.0050773	0.0159522
ENSMUSG00000037563	3224.17	2.18449	0.338488	6.45368	1.09e-10	6.72e-09
ENSMUSG00000037679	495.421	2.54226	0.517461	4.91296	8.97e-07	1.27e-05
ENSMUSG00000037805	1634.66	1.32413	0.373787	3.54246	0.000396406	0.00198586
ENSMUSG00000038002	245.757	1.27828	0.440172	2.90406	0.00368361	0.0122855
ENSMUSG00000038179	27.1196	8.06927	1.85944	4.33962	1.43e-05	0.000132581
ENSMUSG00000038274	5194.79	2.33438	0.421317	5.54067	3.01e-08	7.55e-07
ENSMUSG00000038352	418.49	1.70104	0.626999	2.71299	0.00666785	0.0198343
ENSMUSG00000038400	1407.27	1.1972	0.315005	3.80058	0.000144359	0.000878247
ENSMUSG00000038412	8509.88	2.00753	0.375474	5.34664	8.96e-08	1.83e-06
ENSMUSG00000038467	1572.81	1.94273	0.335886	5.78389	7.3e-09	2.39e-07
ENSMUSG00000038539	579.839	2.01532	0.454158	4.43748	9.1e-06	9.13e-05
ENSMUSG00000038642	1037.99	5.99212	0.649972	9.21905	3e-20	9.07e-18
ENSMUSG00000038690	6933.95	1.44496	0.386967	3.73406	0.000188416	0.00107768
ENSMUSG00000038717	2159.02	1.16225	0.317331	3.66259	0.000249678	0.00135146
ENSMUSG00000038762	2669.6	1.28889	0.410285	3.14146	0.00168106	0.00649535
ENSMUSG00000038811	76.0712	9.54794	1.65135	5.7819	7.39e-09	2.4e-07
ENSMUSG00000038855	819.648	1.39318	0.57817	2.40963	0.0159686	0.0394544
ENSMUSG00000038872	1117.22	2.32801	0.430919	5.40243	6.57e-08	1.46e-06
ENSMUSG00000039001	2898.7	2.13318	0.495439	4.30563	1.67e-05	0.000152545
ENSMUSG00000039193	27.5489	5.63059	1.81099	3.10913	0.00187637	0.00712119
ENSMUSG00000039209	9.27698	5.08627	2.19193	2.32045	0.0203164	0.0481338
ENSMUSG00000039221	859.37	1.17852	0.327974	3.59334	0.000326468	0.0016745
ENSMUSG00000039349	102.888	9.98889	1.57408	6.34586	2.21e-10	1.16e-08
ENSMUSG00000039361	1353.8	1.44272	0.384985	3.74747	0.00017863	0.00103309
ENSMUSG00000039735	593.253	1.11828	0.413105	2.70701	0.00678927	0.0201459
ENSMUSG00000039997	44.0065	8.76717	1.80029	4.86985	1.12e-06	1.54e-05
ENSMUSG00000040026	167.919	9.26735	1.73463	5.34254	9.17e-08	1.86e-06
ENSMUSG00000040269	1564.19	1.4804	0.291837	5.0727	3.92e-07	6.5e-06
ENSMUSG00000040466	947.715	2.17761	0.338574	6.43173	1.26e-10	7.64e-09
ENSMUSG00000040711	490.817	1.42255	0.382253	3.72149	0.000198054	0.0011222
ENSMUSG00000040824	2107.53	1.39253	0.403086	3.45468	0.000550945	0.00256214
ENSMUSG00000040857	223.855	1.25761	0.484093	2.59786	0.00938072	0.0262225
ENSMUSG00000041731	366.359	3.32494	0.433021	7.67846	1.61e-14	2.78e-12
ENSMUSG00000041773	248.042	3.04203	0.467856	6.50208	7.92e-11	5.23e-09
ENSMUSG00000041881	6139.19	1.11765	0.414122	2.69884	0.00695807	0.0205317
ENSMUSG00000042035	508.186	2.05863	0.456453	4.51006	6.48e-06	6.78e-05
ENSMUSG00000042190	20.0083	7.62928	1.9166	3.98064	6.87e-05	0.00048378
ENSMUSG00000042306	212.065	1.82383	0.596481	3.05766	0.00223076	0.00820052
ENSMUSG00000042312	10270.3	1.10179	0.410891	2.68147	0.00733	0.0214871
ENSMUSG00000042354	1753.13	1.76572	0.356057	4.95909	7.08e-07	1.04e-05
ENSMUSG00000042524	166.025	2.08237	0.60943	3.41691	0.000633353	0.00286825
ENSMUSG00000042541	5821.26	1.6239	0.293086	5.54069	3.01e-08	7.55e-07
ENSMUSG00000042745	5697.53	1.12328	0.274202	4.09653	4.19e-05	0.00031851
ENSMUSG00000043279	866.392	2.31404	0.543998	4.25376	2.1e-05	0.000183086
ENSMUSG00000043681	107.734	2.51629	0.714482	3.52184	0.000428566	0.00212644
ENSMUSG00000044330	1843.24	2.50025	0.383613	6.51764	7.14e-11	4.8e-09
ENSMUSG00000044405	21.0892	7.70715	2.29585	3.35699	0.000787952	0.003448
ENSMUSG00000044609	108.947	1.85082	0.531545	3.48197	0.000497748	0.002357
ENSMUSG00000044617	79.0256	1.46991	0.616405	2.38465	0.0170951	0.0417269
ENSMUSG00000044703	28.2823	8.12747	1.96295	4.14043	3.47e-05	0.000272524
ENSMUSG00000044894	5904	1.96382	0.41845	4.69307	2.69e-06	3.28e-05
ENSMUSG00000045005	77.3296	1.54095	0.633016	2.4343	0.0149208	0.0376875
ENSMUSG00000045382	99.9942	3.91256	1.07693	3.63305	0.000280087	0.00148291
ENSMUSG00000045515	463.752	1.39845	0.502533	2.78281	0.00538909	0.0166722
ENSMUSG00000046229	1245.59	1.55915	0.425071	3.66798	0.000244474	0.00132725
ENSMUSG00000046330	6870.98	1.65013	0.433552	3.80606	0.000141195	0.000866253
ENSMUSG00000046364	2126.89	2.19484	0.438854	5.0013	5.69e-07	8.69e-06
ENSMUSG00000046388	12.8886	3.99936	1.72436	2.31933	0.0203769	0.0481958
ENSMUSG00000046402	25015.4	3.36323	0.4021	8.36417	6.05e-17	1.29e-14
ENSMUSG00000046805	292.439	3.72439	0.488071	7.63084	2.33e-14	3.53e-12
ENSMUSG00000047675	5563.57	2.04587	0.379831	5.38627	7.19e-08	1.54e-06
ENSMUSG00000047721	1748.91	2.12079	0.373164	5.68326	1.32e-08	3.84e-07
ENSMUSG00000047798	51.9608	7.52978	1.86806	4.0308	5.56e-05	0.000402169
ENSMUSG00000047843	133.597	1.25736	0.498664	2.52146	0.0116869	0.0311195
ENSMUSG00000047905	554.502	1.27851	0.503325	2.54013	0.011081	0.0298121
ENSMUSG00000048163	35.9832	8.47634	1.78841	4.7396	2.14e-06	2.73e-05
ENSMUSG00000049246	30.7851	2.06757	0.89154	2.3191	0.0203897	0.0481958
ENSMUSG00000049751	3486.77	1.96293	0.309033	6.35186	2.13e-10	1.16e-08
ENSMUSG00000049832	845.987	2.14409	0.320907	6.68136	2.37e-11	1.91e-09
ENSMUSG00000049866	2427.59	1.33964	0.365275	3.66749	0.000244944	0.00132781
ENSMUSG00000049988	13.7008	7.07995	2.56104	2.76449	0.0057012	0.0174446
ENSMUSG00000050299	1491.84	2.61975	0.44115	5.93845	2.88e-09	1.06e-07
ENSMUSG00000050335	18543.9	4.63973	0.319923	14.5026	1.17e-47	4.23e-44
ENSMUSG00000050552	1385.29	1.73971	0.337641	5.15254	2.57e-07	4.71e-06
ENSMUSG00000050856	3573.49	1.44374	0.406356	3.5529	0.000381015	0.00191669
ENSMUSG00000051319	1580.98	1.46621	0.375988	3.89962	9.63e-05	0.000632771
ENSMUSG00000051518	995.395	1.30334	0.336642	3.8716	0.000108122	0.000696272
ENSMUSG00000051723	133.72	2.46736	0.609357	4.04912	5.14e-05	0.000377985
ENSMUSG00000051989	1572.37	1.02946	0.310129	3.31947	0.000901897	0.00388171
ENSMUSG00000052056	409.674	2.10363	0.378188	5.5624	2.66e-08	7.11e-07
ENSMUSG00000052146	3864.94	1.59735	0.412296	3.87428	0.00010694	0.000689889
ENSMUSG00000052192	552.015	2.32734	0.508027	4.58113	4.62e-06	5.15e-05
ENSMUSG00000052305	388.546	6.8686	0.674779	10.179	2.46e-24	1.49e-21
ENSMUSG00000052310	262.418	1.10359	0.448511	2.46057	0.0138715	0.035555
ENSMUSG00000052512	483.271	1.24276	0.404714	3.07072	0.00213544	0.00789808
ENSMUSG00000052825	513.114	2.1572	0.430165	5.01482	5.31e-07	8.27e-06
ENSMUSG00000053063	112.097	10.1135	1.75493	5.76292	8.27e-09	2.61e-07
ENSMUSG00000053173	553.584	1.65873	0.363551	4.56258	5.05e-06	5.48e-05
ENSMUSG00000053604	159.084	1.39111	0.470642	2.95577	0.00311886	0.0107474
ENSMUSG00000054135	14.2882	7.13357	2.03469	3.50598	0.000454928	0.00222382
ENSMUSG00000054312	1751.4	1.51959	0.39096	3.88682	0.000101566	0.000662278
ENSMUSG00000054509	149.74	1.34806	0.465898	2.89347	0.00381005	0.0126607
ENSMUSG00000054889	1030.09	3.24825	0.380731	8.53161	1.44e-17	3.74e-15
ENSMUSG00000055093	302.505	1.8681	0.4313	4.33134	1.48e-05	0.000136968
ENSMUSG00000055435	190.233	4.46194	0.687809	6.48717	8.75e-11	5.67e-09
ENSMUSG00000055771	144.396	1.54081	0.478828	3.21788	0.00129143	0.00527611
ENSMUSG00000055826	62.5506	2.46116	0.767726	3.20578	0.00134698	0.00546009
ENSMUSG00000056073	27.6414	20.8873	4.40918	4.73724	2.17e-06	2.74e-05
ENSMUSG00000056412	206.697	1.0379	0.4247	2.44384	0.0145321	0.0369611
ENSMUSG00000056718	23.8964	3.79098	1.39081	2.72572	0.00641608	0.0192112
ENSMUSG00000056836	236.053	1.89485	0.454537	4.16875	3.06e-05	0.0002461
ENSMUSG00000057036	148.796	2.23398	0.655028	3.41052	0.000648395	0.00292907
ENSMUSG00000057092	3687.54	2.87598	0.371938	7.73242	1.06e-14	1.92e-12
ENSMUSG00000057143	162.747	1.66471	0.56558	2.94337	0.00324661	0.0110877
ENSMUSG00000057322	5641.05	1.93425	0.41634	4.64584	3.39e-06	3.93e-05
ENSMUSG00000057359	127.924	2.01048	0.608153	3.30588	0.000946793	0.00404084
ENSMUSG00000057580	282.268	1.61967	0.503776	3.21506	0.00130418	0.00531625
ENSMUSG00000057605	247.6	2.54156	0.543756	4.67407	2.95e-06	3.55e-05
ENSMUSG00000057657	143.719	2.81848	0.682935	4.12701	3.68e-05	0.000285212
ENSMUSG00000057789	88.1119	2.47454	0.8262	2.99508	0.0027437	0.00963744
ENSMUSG00000058056	1131.95	1.7359	0.485924	3.57236	0.000353773	0.00179958
ENSMUSG00000058064	366.474	2.83149	0.45943	6.16304	7.14e-10	3.24e-08
ENSMUSG00000058351	660.006	1.71418	0.462527	3.70612	0.000210462	0.00117419
ENSMUSG00000058503	1127.36	1.4611	0.352553	4.14434	3.41e-05	0.000270254
ENSMUSG00000058600	2423.99	1.57462	0.367209	4.28808	1.8e-05	0.000162025
ENSMUSG00000058603	105.58	2.58433	0.719812	3.59028	0.000330321	0.00168501
ENSMUSG00000058715	779.029	4.81172	1.53084	3.14319	0.00167119	0.00646515
ENSMUSG00000058838	88.3633	1.45132	0.598008	2.42692	0.0152277	0.0381692
ENSMUSG00000058905	70.0742	3.06301	0.796597	3.84512	0.000120494	0.000763761
ENSMUSG00000059064	267.829	2.05808	0.526523	3.90881	9.28e-05	0.00061361
ENSMUSG00000059070	6093.5	1.57516	0.342147	4.60374	4.15e-06	4.71e-05
ENSMUSG00000059159	497.484	2.32959	0.467268	4.98556	6.18e-07	9.31e-06
ENSMUSG00000059278	1088.78	1.23838	0.401052	3.08783	0.00201625	0.00753815
ENSMUSG00000059291	3153.01	2.39007	0.40187	5.94739	2.72e-09	1.02e-07
ENSMUSG00000059461	472.664	2.08605	0.503695	4.14149	3.45e-05	0.000272443
ENSMUSG00000059534	3869.39	1.12265	0.364837	3.07712	0.00209012	0.00776208
ENSMUSG00000059658	671.086	1.29135	0.440748	2.9299	0.00339068	0.0114986
ENSMUSG00000059775	356.523	2.83688	0.487161	5.82328	5.77e-09	1.91e-07
ENSMUSG00000059901	143.29	2.2	0.723651	3.04015	0.00236464	0.00858837
ENSMUSG00000060063	23.973	3.37323	1.0762	3.1344	0.00172208	0.00661861
ENSMUSG00000060068	286.118	2.68974	0.407597	6.59902	4.14e-11	3.11e-09
ENSMUSG00000060096	35.8278	2.08541	0.842676	2.47474	0.0133332	0.0345162
ENSMUSG00000060143	2147.46	1.52716	0.359899	4.24331	2.2e-05	0.000189558
ENSMUSG00000060198	71.3743	1.86796	0.65431	2.85486	0.00430561	0.0139128
ENSMUSG00000060377	144.5	2.49215	0.583977	4.26754	1.98e-05	0.000174655
ENSMUSG00000060419	503.704	2.43253	0.425505	5.71681	1.09e-08	3.29e-07
ENSMUSG00000060438	762.212	2.13239	0.477802	4.46292	8.09e-06	8.3e-05
ENSMUSG00000060636	3060.53	2.20878	0.351701	6.28027	3.38e-10	1.73e-08
ENSMUSG00000060730	98.1745	2.02561	0.587727	3.44651	0.000567871	0.00263075
ENSMUSG00000060739	529.868	1.15294	0.439312	2.62441	0.00867984	0.0247256
ENSMUSG00000060938	3679.7	2.09641	0.366472	5.72051	1.06e-08	3.24e-07
ENSMUSG00000061272	199.381	2.58057	0.601634	4.28928	1.79e-05	0.000161554
ENSMUSG00000061330	549.077	2.3097	0.43037	5.36676	8.02e-08	1.66e-06
ENSMUSG00000061390	110.282	1.88724	0.627964	3.00534	0.00265285	0.00940934
ENSMUSG00000061488	18.45	3.16085	1.19751	2.63951	0.00830248	0.0238943
ENSMUSG00000061787	4302.22	1.61678	0.399806	4.04392	5.26e-05	0.000384134
ENSMUSG00000061848	388.972	1.86517	0.356264	5.23535	1.65e-07	3.15e-06
ENSMUSG00000062006	3376.99	2.18451	0.303843	7.1896	6.5e-13	8.43e-11
ENSMUSG00000062083	107.6	2.19776	0.602611	3.64707	0.000265249	0.00141883
ENSMUSG00000062456	309.735	1.63873	0.493412	3.32123	0.000896209	0.00386583
ENSMUSG00000062458	121.567	2.19013	0.573021	3.82207	0.000132338	0.000818827
ENSMUSG00000062461	121.466	2.59189	0.674834	3.84078	0.000122644	0.000773847
ENSMUSG00000062647	3822.44	2.10346	0.436693	4.8168	1.46e-06	1.93e-05
ENSMUSG00000062742	172.24	1.99439	0.539011	3.70008	0.000215528	0.00120061
ENSMUSG00000062758	48.6706	2.23139	0.859561	2.59597	0.00943249	0.0262721
ENSMUSG00000062896	87.9131	2.6828	0.673048	3.98605	6.72e-05	0.00047632
ENSMUSG00000062997	1810.39	1.72572	0.311004	5.54887	2.88e-08	7.41e-07
ENSMUSG00000063200	2507.3	1.30717	0.332447	3.93196	8.43e-05	0.000567751
ENSMUSG00000063316	5692.36	1.06588	0.306299	3.47985	0.000501692	0.00236335
ENSMUSG00000063410	178.158	1.93001	0.610257	3.16261	0.00156361	0.00614118
ENSMUSG00000063457	5394.73	2.16049	0.415757	5.19653	2.03e-07	3.8e-06
ENSMUSG00000063623	471.06	1.41596	0.538615	2.6289	0.00856626	0.0244596
ENSMUSG00000063754	259.8	2.18453	0.479105	4.55961	5.12e-06	5.52e-05
ENSMUSG00000064177	12.9814	5.49955	1.94946	2.82106	0.0047865	0.015183
ENSMUSG00000064281	200.53	2.18651	0.494934	4.41778	9.97e-06	9.71e-05
ENSMUSG00000064317	346.776	1.0657	0.379481	2.8083	0.00498036	0.0156748
ENSMUSG00000065145	164.551	10.6639	2.45192	4.3492	1.37e-05	0.000127671
ENSMUSG00000065922	1012.92	5.54503	0.466514	11.8861	1.4e-32	1.69e-29
ENSMUSG00000066116	80.2426	2.58368	0.702922	3.67564	0.000237258	0.00129582
ENSMUSG00000066362	323.697	1.61619	0.428122	3.77506	0.00015997	0.000952475
ENSMUSG00000066442	251.337	1.60315	0.421083	3.80719	0.000140552	0.000863767
ENSMUSG00000066475	34.3749	3.77648	1.01303	3.72791	0.000193078	0.00109915
ENSMUSG00000066491	308.248	1.61691	0.377376	4.28461	1.83e-05	0.000164168
ENSMUSG00000066592	71.4962	2.92198	0.777596	3.75771	0.000171478	0.00100597
ENSMUSG00000066626	36.7225	2.07573	0.855261	2.42701	0.0152238	0.0381692
ENSMUSG00000066629	121.447	1.79406	0.589529	3.04321	0.00234066	0.00854399
ENSMUSG00000066809	138.99	1.58289	0.531077	2.98052	0.00287757	0.0100397
ENSMUSG00000067058	95.4433	2.30707	0.603971	3.81983	0.000133543	0.000824879
ENSMUSG00000067121	161.546	2.42116	0.557752	4.34092	1.42e-05	0.000132138
ENSMUSG00000067158	71.5455	2.02774	0.73612	2.75463	0.00587578	0.0179008
ENSMUSG00000067288	2482.39	2.17652	0.435022	5.00323	5.64e-07	8.64e-06
ENSMUSG00000067344	858.763	2.08652	0.47064	4.43337	9.28e-06	9.23e-05
ENSMUSG00000067719	255.324	1.48514	0.440443	3.37192	0.000746471	0.00329427
ENSMUSG00000067847	3779.53	1.076	0.411474	2.61499	0.00892311	0.0252012
ENSMUSG00000067869	414.055	2.01654	0.416411	4.84266	1.28e-06	1.72e-05
ENSMUSG00000067870	549.979	2.84322	0.512314	5.54975	2.86e-08	7.41e-07
ENSMUSG00000068243	93.7849	2.12078	0.599201	3.53934	0.000401128	0.00200674
ENSMUSG00000068324	21.052	2.97772	1.09575	2.71752	0.00657733	0.0195971
ENSMUSG00000068396	217.258	1.79082	0.536359	3.33884	0.000841289	0.00365498
ENSMUSG00000068397	33.7233	2.75779	1.00691	2.73887	0.00616508	0.0185977
ENSMUSG00000068487	134.576	1.23039	0.509089	2.41684	0.0156558	0.0389465
ENSMUSG00000068706	1444.94	1.0378	0.296293	3.50261	0.000460728	0.00223218
ENSMUSG00000069171	253.761	2.15725	0.776873	2.77684	0.00548909	0.0169671
ENSMUSG00000069188	114.591	2.40061	0.624235	3.84568	0.00012022	0.000763354
ENSMUSG00000069379	409.359	1.80207	0.352966	5.1055	3.3e-07	5.68e-06
ENSMUSG00000069682	278.223	2.20044	0.487201	4.5165	6.29e-06	6.62e-05
ENSMUSG00000069792	193.986	10.9014	2.79115	3.9057	9.4e-05	0.000619308
ENSMUSG00000069833	3452.25	2.9169	0.472005	6.1798	6.42e-10	2.95e-08
ENSMUSG00000069899	323.317	1.9136	0.484301	3.95126	7.77e-05	0.000531744
ENSMUSG00000069917	51.4029	5.96208	1.15938	5.14249	2.71e-07	4.9e-06
ENSMUSG00000069972	613.533	1.63216	0.418415	3.90082	9.59e-05	0.000630774
ENSMUSG00000070047	463.069	1.49153	0.635588	2.34669	0.0189409	0.0453276
ENSMUSG00000070271	218.701	2.39671	0.50293	4.76549	1.88e-06	2.42e-05
ENSMUSG00000070343	276.092	2.97743	0.55485	5.36619	8.04e-08	1.66e-06
ENSMUSG00000070394	3352.89	1.5142	0.40199	3.76676	0.000165378	0.000975085
ENSMUSG00000070461	34.6541	2.87185	1.11087	2.58521	0.00973196	0.0268999
ENSMUSG00000070531	16.871	7.3873	2.15074	3.43477	0.000593063	0.00271285
ENSMUSG00000070667	143.238	2.6676	0.548445	4.86394	1.15e-06	1.57e-05
ENSMUSG00000070691	20.218	5.16404	1.75287	2.94605	0.00321865	0.0110077
ENSMUSG00000070834	151.874	2.19731	0.470783	4.66736	3.05e-06	3.63e-05
ENSMUSG00000070867	403.86	2.0576	0.608043	3.38398	0.00071444	0.00316831
ENSMUSG00000070972	447.61	1.40152	0.369751	3.79044	0.000150382	0.000904284
ENSMUSG00000071052	29.026	2.87099	1.10582	2.59626	0.00942439	0.0262697
ENSMUSG00000071141	643.29	2.19188	0.343861	6.37431	1.84e-10	1.06e-08
ENSMUSG00000071303	116.55	2.33363	0.618777	3.77135	0.000162367	0.000962019
ENSMUSG00000071415	5963.81	1.76656	0.387233	4.56202	5.07e-06	5.48e-05
ENSMUSG00000071419	223.557	2.05601	0.449154	4.57751	4.71e-06	5.23e-05
ENSMUSG00000071451	836.185	1.57657	0.385343	4.09135	4.29e-05	0.00032384
ENSMUSG00000071528	4160.29	1.11064	0.380662	2.91766	0.00352674	0.0118647
ENSMUSG00000071680	63.4949	2.12246	0.737619	2.87745	0.00400898	0.0131691
ENSMUSG00000071715	52.9806	9.03194	1.81602	4.97346	6.58e-07	9.79e-06
ENSMUSG00000071867	201.513	2.40513	0.480717	5.00321	5.64e-07	8.64e-06
ENSMUSG00000072255	56.4815	2.5937	0.786035	3.29973	0.000967789	0.00411594
ENSMUSG00000072324	69.7295	5.65511	0.959401	5.89442	3.76e-09	1.34e-07
ENSMUSG00000072940	262.731	2.699	0.499545	5.40293	6.56e-08	1.46e-06
ENSMUSG00000073152	12.5869	5.4556	2.21267	2.46562	0.0136778	0.0352323
ENSMUSG00000073412	85.9622	2.88523	1.04599	2.75837	0.00580905	0.0177149
ENSMUSG00000073489	72.4141	9.48418	1.67516	5.66165	1.5e-08	4.23e-07
ENSMUSG00000073616	2668.07	1.81168	0.298515	6.06897	1.29e-09	5.5e-08
ENSMUSG00000073640	379.476	1.42745	0.363781	3.92391	8.71e-05	0.000580602
ENSMUSG00000073702	3864.42	2.415	0.440886	5.47761	4.31e-08	1.04e-06
ENSMUSG00000073705	125.149	1.79222	0.526921	3.4013	0.000670657	0.00299304
ENSMUSG00000073867	67.9275	1.73708	0.699163	2.48452	0.0129728	0.0338242
ENSMUSG00000074218	931.54	3.38352	0.570006	5.93595	2.92e-09	1.06e-07
ENSMUSG00000074466	215.476	1.07908	0.420904	2.56373	0.0103555	0.0281943
ENSMUSG00000074547	34.8513	3.45911	1.0069	3.43541	0.000591659	0.00271285
ENSMUSG00000074656	3945.16	1.69327	0.395921	4.27679	1.9e-05	0.00016879
ENSMUSG00000074698	892.245	1.31682	0.424655	3.10091	0.00192928	0.0072613
ENSMUSG00000074800	336.837	1.82148	0.412401	4.41678	1e-05	9.73e-05
ENSMUSG00000074813	782.322	1.90479	0.595671	3.19773	0.00138515	0.00558364
ENSMUSG00000074930	34.0104	2.36387	0.94837	2.49256	0.0126827	0.0332299
ENSMUSG00000075010	94.2853	9.86381	1.68103	5.86772	4.42e-09	1.54e-07
ENSMUSG00000075014	175.422	3.09565	0.856922	3.61252	0.000303234	0.00157786
ENSMUSG00000075015	27.8021	3.08778	1.28677	2.39963	0.0164116	0.0403902
ENSMUSG00000075705	278.876	1.0572	0.426632	2.47802	0.0132115	0.0343235
ENSMUSG00000076135	147.137	3.08431	0.673946	4.57649	4.73e-06	5.24e-05
ENSMUSG00000076137	215.893	2.28037	0.536403	4.25123	2.13e-05	0.000184288
ENSMUSG00000076609	98.3137	4.51226	1.25181	3.60459	0.000312642	0.00161524
ENSMUSG00000076614	107.419	3.68311	1.17417	3.13678	0.00170816	0.00658604
ENSMUSG00000078126	155.237	2.4326	0.584014	4.16531	3.11e-05	0.000248198
ENSMUSG00000078184	431.174	1.69099	0.362105	4.66988	3.01e-06	3.61e-05
ENSMUSG00000078193	974.288	1.90535	0.347608	5.48131	4.22e-08	1.03e-06
ENSMUSG00000078480	266.881	1.87364	0.399291	4.69243	2.7e-06	3.28e-05
ENSMUSG00000078974	3063.5	1.54426	0.419282	3.68311	0.000230407	0.0012641
ENSMUSG00000079017	2841.66	3.444	0.337977	10.19	2.2e-24	1.49e-21
ENSMUSG00000079435	2102.73	1.87825	0.408116	4.60224	4.18e-06	4.73e-05
ENSMUSG00000079478	886.351	1.15746	0.31226	3.70673	0.000209955	0.00117317
ENSMUSG00000079480	1072.78	1.36843	0.395949	3.45609	0.000548073	0.00255533
ENSMUSG00000079641	2992.91	2.19137	0.485359	4.51496	6.33e-06	6.65e-05
ENSMUSG00000079941	721.858	1.27974	0.367485	3.48243	0.00049689	0.00235601
ENSMUSG00000079942	240.221	2.31715	0.679974	3.4077	0.000655129	0.0029412
ENSMUSG00000079962	92.841	1.55314	0.631203	2.46061	0.0138702	0.035555
ENSMUSG00000079988	34.7086	2.42491	0.917423	2.64317	0.00821334	0.0236753
ENSMUSG00000080021	93.9058	1.36533	0.551641	2.47504	0.0133223	0.0345125
ENSMUSG00000080198	70.3742	1.91871	0.628609	3.05231	0.0022709	0.00831443
ENSMUSG00000080711	49.2762	2.77714	0.753234	3.68696	0.000226952	0.00125082
ENSMUSG00000080768	42.8848	2.29238	0.7693	2.97983	0.00288408	0.0100527
ENSMUSG00000080776	295.845	1.43772	0.416124	3.45504	0.000550216	0.00256203
ENSMUSG00000080779	19.2387	3.03239	1.16759	2.59715	0.00940018	0.0262425
ENSMUSG00000080811	494.992	4.04125	0.674235	5.99383	2.05e-09	8.09e-08
ENSMUSG00000080836	493.819	1.12971	0.358035	3.1553	0.00160334	0.0062482
ENSMUSG00000080848	247.974	2.03029	0.528404	3.84231	0.000121883	0.000771216
ENSMUSG00000080866	61.2504	2.73184	0.721054	3.78868	0.000151452	0.000906214
ENSMUSG00000080877	61.8484	1.62733	0.658519	2.4712	0.0134661	0.0347611
ENSMUSG00000080893	1500.35	1.73292	0.391229	4.42943	9.45e-06	9.33e-05
ENSMUSG00000080921	1324.63	2.047	0.404618	5.05909	4.21e-07	6.89e-06
ENSMUSG00000081021	170.01	1.29088	0.457033	2.82447	0.00473593	0.0150753
ENSMUSG00000081049	253.316	2.01893	0.551455	3.6611	0.000251135	0.00135733
ENSMUSG00000081087	169.945	3.28379	0.611771	5.36768	7.98e-08	1.66e-06
ENSMUSG00000081094	241.63	2.2444	0.430076	5.21861	1.8e-07	3.43e-06
ENSMUSG00000081159	90.2328	2.44903	0.645211	3.7957	0.000147225	0.000891203
ENSMUSG00000081276	20.9982	3.23494	1.21637	2.65951	0.00782534	0.0226648
ENSMUSG00000081281	128.667	1.6561	0.522093	3.17204	0.00151374	0.00600866
ENSMUSG00000081302	85.1917	1.93747	0.716061	2.70573	0.00681548	0.0201743
ENSMUSG00000081306	573.672	1.27105	0.394267	3.22383	0.00126487	0.00517926
ENSMUSG00000081344	1102.39	1.98121	0.491825	4.02828	5.62e-05	0.000404892
ENSMUSG00000081352	71.6068	1.66224	0.631602	2.63178	0.00849391	0.0243296
ENSMUSG00000081378	82.5232	1.69805	0.600007	2.83006	0.004654	0.0148535
ENSMUSG00000081413	155.417	1.10891	0.451555	2.45577	0.0140584	0.0359833
ENSMUSG00000081421	15.4246	3.06837	1.32271	2.31975	0.0203542	0.0481919
ENSMUSG00000081473	71.5846	1.4584	0.60869	2.39597	0.0165766	0.0407073
ENSMUSG00000081485	375.344	1.73735	0.50572	3.43541	0.000591659	0.00271285
ENSMUSG00000081491	232.676	2.73746	0.440796	6.21026	5.29e-10	2.46e-08
ENSMUSG00000081603	163.782	2.11883	0.54015	3.92267	8.76e-05	0.000582537
ENSMUSG00000081604	320.852	1.37822	0.436454	3.15778	0.00158977	0.00620865
ENSMUSG00000081631	34.7169	2.34152	0.982499	2.38323	0.0171613	0.0418589
ENSMUSG00000081700	107.961	1.55892	0.595894	2.61611	0.00889384	0.0251381
ENSMUSG00000081740	178.306	2.21049	0.49437	4.47132	7.77e-06	8.02e-05
ENSMUSG00000081848	183.857	2.47741	0.4972	4.98273	6.27e-07	9.41e-06
ENSMUSG00000081967	149.748	1.09565	0.465718	2.35261	0.0186424	0.0447516
ENSMUSG00000082013	28.3654	2.9213	1.04652	2.79143	0.0052476	0.0163599
ENSMUSG00000082044	405.71	1.78859	0.349647	5.1154	3.13e-07	5.47e-06
ENSMUSG00000082064	226.202	1.63645	0.450086	3.63586	0.000277049	0.00147149
ENSMUSG00000082190	37.195	2.1906	0.836796	2.61784	0.00884887	0.0250695
ENSMUSG00000082193	98.4176	1.82547	0.601631	3.0342	0.00241172	0.00868984
ENSMUSG00000082260	79.422	2.05486	0.661782	3.10504	0.00190252	0.00719037
ENSMUSG00000082423	66.0584	2.21465	0.775629	2.85529	0.00429975	0.0139062
ENSMUSG00000082431	385.272	1.11438	0.352371	3.16253	0.00156404	0.00614118
ENSMUSG00000082475	89.9349	2.03803	0.650662	3.13223	0.00173481	0.00666051
ENSMUSG00000082481	52.059	2.62407	0.972306	2.69881	0.00695884	0.0205317
ENSMUSG00000082520	10.4618	6.68369	2.83472	2.35779	0.0183839	0.0442774
ENSMUSG00000082655	19.4457	2.71974	1.1515	2.36192	0.0181807	0.0438462
ENSMUSG00000082674	133.186	1.54422	0.636701	2.42534	0.0152941	0.0382563
ENSMUSG00000082755	246.307	2.38529	0.564863	4.22278	2.41e-05	0.000203823
ENSMUSG00000082774	86.5447	1.93294	0.573317	3.3715	0.000747607	0.00329528
ENSMUSG00000082826	554.666	1.43336	0.427592	3.35217	0.000801811	0.00349182
ENSMUSG00000082836	91.7737	1.34522	0.565301	2.37965	0.017329	0.0421561
ENSMUSG00000082861	17.7959	3.95431	1.30967	3.01931	0.00253348	0.00903892
ENSMUSG00000082867	91.5213	1.60363	0.599421	2.67529	0.00746643	0.0217641
ENSMUSG00000082998	175.052	1.97749	0.502192	3.93773	8.23e-05	0.000556348
ENSMUSG00000083022	210.586	2.96898	0.597704	4.96732	6.79e-07	1e-05
ENSMUSG00000083121	181.675	1.29725	0.438381	2.95919	0.0030845	0.0106593
ENSMUSG00000083166	97.9985	1.80356	0.719999	2.50495	0.012247	0.0323029
ENSMUSG00000083192	38.814	2.27146	0.893526	2.54214	0.0110178	0.0296858
ENSMUSG00000083326	394.265	2.01377	0.460316	4.37475	1.22e-05	0.000115285
ENSMUSG00000083328	65.6515	1.97115	0.663727	2.96981	0.00297979	0.0103589
ENSMUSG00000083337	438.888	1.83141	0.386818	4.73457	2.2e-06	2.77e-05
ENSMUSG00000083344	68.1447	2.1679	0.675815	3.20783	0.00133741	0.00542736
ENSMUSG00000083362	79.8553	2.2718	0.648625	3.50248	0.00046094	0.00223218
ENSMUSG00000083364	113.038	1.72121	0.558608	3.08125	0.00206134	0.0076709
ENSMUSG00000083429	71.6812	2.40098	0.703461	3.4131	0.000642281	0.00290506
ENSMUSG00000083454	164.66	2.38811	0.661212	3.61171	0.000304181	0.00157826
ENSMUSG00000083481	68.0687	2.30056	0.788211	2.91871	0.00351488	0.0118423
ENSMUSG00000083553	25.005	2.94655	1.09429	2.69266	0.00708852	0.0208804
ENSMUSG00000083621	391.892	2.01544	0.447839	4.50036	6.78e-06	7.08e-05
ENSMUSG00000083716	494.293	2.00449	0.41184	4.86716	1.13e-06	1.56e-05
ENSMUSG00000083743	28.0238	2.32022	0.973656	2.383	0.0171723	0.0418589
ENSMUSG00000083772	17.6038	3.08716	1.30355	2.36826	0.0178719	0.0432739
ENSMUSG00000083820	307.848	1.34393	0.411195	3.26836	0.00108175	0.00451024
ENSMUSG00000083853	34.0314	3.91944	1.29483	3.027	0.00246993	0.00883821
ENSMUSG00000083878	192.998	1.5604	0.493617	3.16117	0.00157138	0.00616334
ENSMUSG00000083911	170.576	1.897	0.47608	3.98462	6.76e-05	0.000477593
ENSMUSG00000083992	725.048	2.2055	0.3907	5.64501	1.65e-08	4.58e-07
ENSMUSG00000084060	74.2916	2.04944	0.749191	2.73553	0.0062279	0.018725
ENSMUSG00000084093	561.373	1.35245	0.385485	3.50845	0.000450734	0.00221524
ENSMUSG00000084106	299.947	2.31912	0.490809	4.72509	2.3e-06	2.88e-05
ENSMUSG00000084116	67.2637	1.94776	0.662199	2.94135	0.00326789	0.0111446
ENSMUSG00000084168	161.191	1.16264	0.501978	2.31611	0.0205522	0.0484711
ENSMUSG00000084224	73.3711	2.65576	0.824677	3.22036	0.00128029	0.00523648
ENSMUSG00000084235	380.138	1.30629	0.373696	3.49559	0.000473013	0.00226348
ENSMUSG00000084304	214.077	1.86266	0.504999	3.68844	0.000225636	0.00124735
ENSMUSG00000084314	255.657	2.56377	0.496361	5.16514	2.4e-07	4.43e-06
ENSMUSG00000084342	72.642	2.14951	0.765328	2.80861	0.00497553	0.0156731
ENSMUSG00000084403	54.8677	5.69077	1.1723	4.85435	1.21e-06	1.64e-05
ENSMUSG00000084416	363.418	1.81745	0.438672	4.14308	3.43e-05	0.000271147
ENSMUSG00000084771	20.6298	7.67097	2.39632	3.20115	0.0013688	0.00553002
ENSMUSG00000084830	749.511	1.21378	0.400671	3.02938	0.00245059	0.008795
ENSMUSG00000084947	6.62086	6.03422	2.48287	2.43034	0.0150848	0.0379943
ENSMUSG00000085099	135.219	1.95133	0.520266	3.75063	0.000176387	0.00102502
ENSMUSG00000085156	438.519	1.68159	0.34733	4.84149	1.29e-06	1.72e-05
ENSMUSG00000085342	300.381	2.0147	0.443207	4.54574	5.47e-06	5.83e-05
ENSMUSG00000085442	99.3099	2.62569	0.653491	4.01794	5.87e-05	0.000420367
ENSMUSG00000085531	22.7763	4.10639	1.70074	2.41447	0.0157581	0.0390405
ENSMUSG00000085787	469.594	1.26076	0.421702	2.9897	0.00279253	0.00977115
ENSMUSG00000085897	40.8321	2.20907	0.860525	2.56712	0.0102548	0.0280251
ENSMUSG00000086003	138.199	2.03881	0.677937	3.00737	0.00263519	0.00937414
ENSMUSG00000086316	540.196	1.02169	0.408531	2.50089	0.0123881	0.0325803
ENSMUSG00000086324	13584.7	2.06194	0.596492	3.45677	0.000546688	0.00255215
ENSMUSG00000086542	2257.41	2.26098	0.418408	5.40378	6.53e-08	1.46e-06
ENSMUSG00000086567	488.132	1.43993	0.565256	2.54739	0.0108532	0.0293078
ENSMUSG00000086583	834.867	1.64398	0.412467	3.98571	6.73e-05	0.00047632
ENSMUSG00000087107	54.7199	6.57208	1.42273	4.61933	3.85e-06	4.41e-05
ENSMUSG00000087150	1415.37	2.19771	0.521737	4.21231	2.53e-05	0.00021033
ENSMUSG00000087269	323.117	1.27499	0.497394	2.56333	0.0103673	0.0282052
ENSMUSG00000087412	125.632	2.18467	0.550416	3.96913	7.21e-05	0.000501117
ENSMUSG00000087477	17.8521	7.46783	2.04191	3.65728	0.000254904	0.00136955
ENSMUSG00000087687	1441.71	1.86667	0.47146	3.95934	7.52e-05	0.000517
ENSMUSG00000088595	461.062	5.18165	0.508063	10.1988	2.01e-24	1.49e-21
ENSMUSG00000089695	107.058	1.31205	0.544379	2.41017	0.0159451	0.0394231
ENSMUSG00000089929	18.4775	7.51752	2.04362	3.67852	0.000234588	0.00128317
ENSMUSG00000089937	39.9142	2.02475	0.831938	2.43378	0.0149422	0.0376875
ENSMUSG00000089988	107.682	2.30696	0.625904	3.6858	0.000227983	0.0012546
ENSMUSG00000090031	85.4154	1.6015	0.637493	2.51219	0.0119984	0.0317626
ENSMUSG00000090119	198.902	1.33275	0.456225	2.92126	0.00348624	0.0117677
ENSMUSG00000090136	287.389	1.79532	0.498996	3.59787	0.000320833	0.00165286
ENSMUSG00000090247	237.394	1.08794	0.399788	2.72128	0.00650299	0.0194234
ENSMUSG00000090467	105.184	2.02748	0.708209	2.86283	0.00419876	0.0136281
ENSMUSG00000090516	189.949	2.39508	0.567933	4.21719	2.47e-05	0.000207014
ENSMUSG00000090553	2256.51	1.49811	0.293334	5.10718	3.27e-07	5.66e-06
ENSMUSG00000091086	248.967	2.43808	0.492568	4.94972	7.43e-07	1.08e-05
ENSMUSG00000091285	26.8961	2.34366	0.962771	2.43429	0.0149211	0.0376875
ENSMUSG00000091449	439.432	1.82226	0.372833	4.88761	1.02e-06	1.42e-05
ENSMUSG00000091460	284.368	1.87097	0.503616	3.71508	0.000203142	0.00114278
ENSMUSG00000091649	75.4607	9.54317	1.88291	5.0683	4.01e-07	6.63e-06
ENSMUSG00000091742	58.0018	2.18969	0.730426	2.99782	0.00271915	0.00959023
ENSMUSG00000091803	231.292	1.36454	0.492467	2.77082	0.00559147	0.0172104
ENSMUSG00000091818	27.2461	3.17312	1.07516	2.95132	0.00316422	0.0108624
ENSMUSG00000091845	445.865	2.0895	0.508973	4.10533	4.04e-05	0.000308206
ENSMUSG00000091989	378.096	1.15451	0.352961	3.27094	0.00107193	0.00447498
ENSMUSG00000092072	565.771	1.56683	0.407964	3.84062	0.000122725	0.000773847
ENSMUSG00000092341	150843	1.64156	0.503073	3.26305	0.00110218	0.00458024
ENSMUSG00000092344	64.8661	2.11072	0.710171	2.97214	0.00295736	0.0102983
ENSMUSG00000093473	55.2108	2.07219	0.774289	2.67624	0.00744526	0.0217373
ENSMUSG00000093483	769.53	4.29843	0.435426	9.87176	5.52e-23	2.86e-20
ENSMUSG00000093674	8731.93	1.32743	0.379432	3.49848	0.000467927	0.00225101
ENSMUSG00000093885	37.4537	2.79111	0.847267	3.29425	0.000986832	0.00418712
ENSMUSG00000093919	28.1467	2.7562	0.988821	2.78736	0.00531397	0.0164819
ENSMUSG00000094122	84.3516	2.54047	0.722921	3.51418	0.000441115	0.00217681
ENSMUSG00000094191	51.0609	3.35419	0.812047	4.13054	3.62e-05	0.000281471
ENSMUSG00000094936	68.4662	2.28776	0.714327	3.20267	0.00136158	0.00550698
ENSMUSG00000094955	165.8	1.99258	0.520162	3.83069	0.000127783	0.000797438
ENSMUSG00000095526	107.199	2.4548	0.554737	4.42517	9.64e-06	9.43e-05
ENSMUSG00000095847	239.661	1.64488	0.466729	3.52426	0.000424665	0.00211285
ENSMUSG00000096010	50.3305	3.9915	1.61142	2.47702	0.0132486	0.0343743
ENSMUSG00000096215	1282.29	1.64181	0.453585	3.61963	0.00029503	0.00155522
ENSMUSG00000096474	42.096	3.24892	0.876431	3.70699	0.000209736	0.00117317
ENSMUSG00000096727	220.953	1.43619	0.443809	3.23605	0.00121197	0.0049795
ENSMUSG00000096842	684.434	1.58766	0.385356	4.11999	3.79e-05	0.000292797
ENSMUSG00000097063	39.0035	5.46373	1.361	4.01451	5.96e-05	0.00042507
ENSMUSG00000097113	24.4573	6.44063	1.87878	3.42809	0.000607844	0.00277348
ENSMUSG00000097296	108.716	1.7037	0.689394	2.47131	0.013462	0.0347611
ENSMUSG00000097415	2200.21	2.44136	0.353799	6.90042	5.19e-12	5.71e-10
ENSMUSG00000097645	12.693	6.97613	2.24627	3.10565	0.00189861	0.00718306
ENSMUSG00000097971	1713.85	3.8889	0.676038	5.75249	8.79e-09	2.75e-07
ENSMUSG00000097987	34.5904	3.68488	1.03126	3.57317	0.000352687	0.00179658
ENSMUSG00000098201	42.8221	2.57495	0.823448	3.12704	0.00176577	0.0067508
ENSMUSG00000098206	68.9938	3.51817	0.973989	3.61213	0.000303694	0.00157799
ENSMUSG00000098447	10.5046	6.70309	2.35601	2.84511	0.00443966	0.0142571
ENSMUSG00000098492	62.692	3.28809	0.835532	3.93533	8.31e-05	0.000560881
ENSMUSG00000098557	172.626	4.52386	0.712461	6.34962	2.16e-10	1.16e-08
ENSMUSG00000098559	50.0921	1.67716	0.721253	2.32534	0.0200537	0.0476358
ENSMUSG00000099471	147.263	2.39821	0.589717	4.06672	4.77e-05	0.000353413
ENSMUSG00000099481	59.3692	1.75089	0.690089	2.5372	0.0111744	0.0300255
ENSMUSG00000099764	261.869	1.69347	0.451241	3.75292	0.000174784	0.00101896
ENSMUSG00000099974	23.0016	5.43896	1.59565	3.40862	0.000652921	0.00293855
ENSMUSG00000100158	7.58708	6.22041	2.36458	2.63066	0.00852202	0.0243716
ENSMUSG00000100215	218.837	2.77248	0.511096	5.42458	5.81e-08	1.32e-06
ENSMUSG00000100228	189.487	2.15891	0.569821	3.78876	0.0001514	0.000906214
ENSMUSG00000100405	65.7655	2.06394	0.757577	2.72439	0.006442	0.0192571
ENSMUSG00000100865	34.6621	2.43662	1.04656	2.32821	0.0199012	0.0473043
ENSMUSG00000101219	143.336	1.79865	0.525589	3.42216	0.000621268	0.00282409
ENSMUSG00000101502	84.5551	2.64637	0.695588	3.80451	0.000142086	0.000869556
ENSMUSG00000101523	92.7936	1.88933	0.658984	2.86704	0.00414332	0.0135086
ENSMUSG00000101567	147.671	2.29209	0.477973	4.79543	1.62e-06	2.12e-05
ENSMUSG00000101609	219.483	3.13636	0.543495	5.77072	7.89e-09	2.54e-07
ENSMUSG00000102117	77.9381	1.5189	0.64534	2.35364	0.0185906	0.0446567
ENSMUSG00000102135	107.742	2.5676	0.603693	4.25315	2.11e-05	0.000183146
ENSMUSG00000102258	7.83659	6.28135	2.45551	2.55807	0.0105256	0.0285931
ENSMUSG00000102562	20.8354	4.65278	1.46457	3.17689	0.00148866	0.00593501
ENSMUSG00000102571	22.3406	3.09987	1.23772	2.50451	0.012262	0.0323039
ENSMUSG00000102666	26.1523	3.01752	1.06753	2.82663	0.00470406	0.014987
ENSMUSG00000102827	146.995	1.55119	0.527612	2.94002	0.00328187	0.0111713
ENSMUSG00000102964	21.9743	7.76146	1.83185	4.23694	2.27e-05	0.000193834
ENSMUSG00000103423	184.094	2.77021	0.630391	4.39444	1.11e-05	0.000106273
ENSMUSG00000103558	374.927	7.42561	1.00453	7.3921	1.45e-13	2.02e-11
ENSMUSG00000103593	41.5484	4.73898	1.52967	3.09805	0.00194799	0.00732413
ENSMUSG00000103672	15.9168	4.31119	1.56905	2.74763	0.00600268	0.0181855
ENSMUSG00000103808	29.4518	8.17934	1.74814	4.67888	2.88e-06	3.48e-05
ENSMUSG00000103928	204.25	6.04333	1.11943	5.39857	6.72e-08	1.47e-06
ENSMUSG00000103983	51.8327	2.46354	0.852541	2.88965	0.00385675	0.0127954
ENSMUSG00000104360	388.542	1.37601	0.459672	2.99347	0.00275825	0.0096792
ENSMUSG00000104418	32.0732	2.96233	0.934086	3.17136	0.00151725	0.00601599
ENSMUSG00000104476	40.2594	2.42668	0.939808	2.5821	0.00982004	0.0271227
ENSMUSG00000104649	221.31	1.66425	0.476943	3.48942	0.000484076	0.0023073
ENSMUSG00000104699	105.696	1.86995	0.616952	3.03095	0.00243789	0.00876674
ENSMUSG00000104864	95.7903	2.10417	0.561911	3.74466	0.000180637	0.00104138
ENSMUSG00000104925	20.2628	3.6597	1.43616	2.54825	0.0108264	0.0292697
ENSMUSG00000104935	1424.75	5.45048	1.32417	4.11613	3.85e-05	0.000296871
ENSMUSG00000105031	158.93	2.29704	0.570461	4.02663	5.66e-05	0.000406938
ENSMUSG00000105076	36.1276	3.43628	1.08922	3.15482	0.001606	0.00625186
ENSMUSG00000105135	45.1902	2.48706	1.00407	2.47698	0.01325	0.0343743
ENSMUSG00000105181	24.9132	3.10695	1.13155	2.74576	0.00603713	0.0182724
ENSMUSG00000105233	155.384	2.62789	0.575162	4.56896	4.9e-06	5.37e-05
ENSMUSG00000105388	398.657	1.96014	0.442343	4.43127	9.37e-06	9.3e-05
ENSMUSG00000105429	12.2563	6.91204	2.69362	2.56608	0.0102855	0.0280668
ENSMUSG00000105434	42.6543	5.65126	1.22434	4.61577	3.92e-06	4.47e-05
ENSMUSG00000105547	14.0124	7.11044	2.11957	3.35466	0.000794636	0.00346889
ENSMUSG00000105748	11.5882	6.8298	2.15111	3.175	0.00149834	0.00596055
ENSMUSG00000105814	257.718	2.29445	0.608141	3.77289	0.000161366	0.00095765
ENSMUSG00000105962	7.98009	6.29686	2.2998	2.73801	0.00618128	0.0186156
ENSMUSG00000106135	71.9279	1.90665	0.763195	2.49824	0.012481	0.032801
ENSMUSG00000106208	46.528	2.22176	0.770029	2.8853	0.00391044	0.0129275
ENSMUSG00000106246	186.952	1.87437	0.448054	4.18335	2.87e-05	0.000233917
ENSMUSG00000106258	114.749	2.74882	0.718921	3.82354	0.000131548	0.000816719
ENSMUSG00000106392	41.5052	1.89431	0.775774	2.44184	0.0146128	0.0371145
ENSMUSG00000106562	62.4621	2.32274	0.794415	2.92383	0.00345748	0.0116923
ENSMUSG00000106568	24.0363	3.00163	1.09964	2.72966	0.00634003	0.0190149
ENSMUSG00000106636	25.0951	3.63031	1.22662	2.9596	0.00308042	0.0106553
ENSMUSG00000106772	13.6758	7.07106	2.76408	2.5582	0.0105216	0.0285931
ENSMUSG00000106864	668.623	1.04813	0.430007	2.43748	0.0147899	0.0375119
ENSMUSG00000106926	322.633	1.69371	0.45351	3.73466	0.000187969	0.00107752
ENSMUSG00000107026	39.1077	2.5196	0.894537	2.81665	0.0048527	0.0153528
ENSMUSG00000107116	17.0936	5.01501	1.73819	2.8852	0.0039117	0.0129275
ENSMUSG00000107160	55.8957	2.56626	0.788976	3.25265	0.00114334	0.00474043
ENSMUSG00000107168	16.4313	7.34071	2.02916	3.61761	0.000297339	0.00156078
ENSMUSG00000107176	1371.36	2.10361	0.378474	5.55815	2.73e-08	7.18e-07
ENSMUSG00000107462	85.0446	3.13013	0.714553	4.38054	1.18e-05	0.000112853
ENSMUSG00000107470	1133.59	1.4961	0.32348	4.62502	3.75e-06	4.31e-05
ENSMUSG00000107747	169.418	1.68036	0.474269	3.54305	0.000395524	0.00198418
ENSMUSG00000108366	74.5546	1.70622	0.66279	2.5743	0.0100445	0.0275957
ENSMUSG00000108452	202.966	1.88552	0.476421	3.95767	7.57e-05	0.000519634
ENSMUSG00000108609	43.8567	2.3482	0.785127	2.99086	0.00278196	0.00974356
ENSMUSG00000109059	209.627	1.72367	0.426114	4.04509	5.23e-05	0.00038312
ENSMUSG00000109171	152.711	2.59895	0.596448	4.35738	1.32e-05	0.000124177
ENSMUSG00000109199	12.9543	6.99242	2.71735	2.57325	0.0100749	0.0276375
ENSMUSG00000109580	71.5106	2.10034	0.693655	3.02793	0.00246237	0.00881983
ENSMUSG00000109905	100.869	2.21104	0.557135	3.96859	7.23e-05	0.000501117
ENSMUSG00000109933	156.639	1.98416	0.461036	4.3037	1.68e-05	0.000153285
ENSMUSG00000110057	333.502	2.14061	0.50118	4.27114	1.94e-05	0.000172702
ENSMUSG00000110185	276.633	1.15901	0.39873	2.90676	0.00365198	0.0122024
ENSMUSG00000110275	1431.89	1.9948	0.329492	6.05416	1.41e-09	5.89e-08
ENSMUSG00000110407	23.8526	3.01573	1.04366	2.88957	0.00385764	0.0127954
ENSMUSG00000110532	469.039	1.24706	0.397667	3.13595	0.001713	0.00659288

## Sheet: B_sigGenes in HC
ensembl_gene_id	baseMean	log2FoldChange	lfcSE	stat	pvalue	padj
ENSMUSG00000024786	16.2414	-7.77857	2.01208	-3.86593	0.000110665	0.000708039
ENSMUSG00000051998	13.5407	-7.51371	2.04732	-3.67002	0.000242532	0.00132066
ENSMUSG00000059852	12.1376	-7.35751	2.0974	-3.50792	0.000451628	0.00221664
ENSMUSG00000034391	39.7156	-7.12853	1.41656	-5.03229	4.85e-07	7.75e-06
ENSMUSG00000048699	33.2311	-7.01079	1.43442	-4.88756	1.02e-06	1.42e-05
ENSMUSG00000087341	14.9887	-6.7054	1.85356	-3.61758	0.000297374	0.00156078
ENSMUSG00000030867	14.6978	-6.67682	1.85771	-3.59411	0.000325497	0.00167214
ENSMUSG00000024109	27.9285	-6.2252	1.33726	-4.65518	3.24e-06	3.79e-05
ENSMUSG00000034416	7.67558	-5.65314	2.26819	-2.49235	0.01269	0.0332299
ENSMUSG00000048655	10.9819	-5.08653	2.15055	-2.36522	0.0180193	0.0435436
ENSMUSG00000021647	299.33	-4.98383	1.81269	-2.74942	0.00597012	0.0181452
ENSMUSG00000085433	45.8766	-4.93948	0.910071	-5.42757	5.71e-08	1.3e-06
ENSMUSG00000044378	68.0547	-4.85425	0.967487	-5.01738	5.24e-07	8.27e-06
ENSMUSG00000036110	50.8994	-4.82581	1.00862	-4.78457	1.71e-06	2.23e-05
ENSMUSG00000030711	13.344	-4.80055	1.75067	-2.74212	0.00610432	0.018445
ENSMUSG00000049999	49.5488	-4.5816	1.03124	-4.4428	8.88e-06	8.96e-05
ENSMUSG00000029061	81.1786	-4.43508	1.06199	-4.17618	2.96e-05	0.000239796
tg_beta-lac	49.1853	-4.3414	1.03745	-4.18467	2.86e-05	0.000233087
ENSMUSG00000032796	47.8114	-4.19703	0.988942	-4.24396	2.2e-05	0.000189458
ENSMUSG00000022871	64.0771	-4.07859	0.931665	-4.37774	1.2e-05	0.000114015
ENSMUSG00000098108	15.7479	-3.81625	1.57272	-2.42653	0.0152438	0.0381832
ENSMUSG00000049796	42.4573	-3.79569	1.25264	-3.03015	0.00244431	0.00878113
ENSMUSG00000029608	31.0507	-3.73587	1.06593	-3.50479	0.00045697	0.00223072
ENSMUSG00000033981	21.6326	-3.73111	1.57051	-2.37574	0.017514	0.0425205
ENSMUSG00000094686	333.745	-3.66523	0.579626	-6.32344	2.56e-10	1.33e-08
ENSMUSG00000043301	39.9757	-3.63194	0.956747	-3.79613	0.000146972	0.000891203
ENSMUSG00000072884	17.9463	-3.62931	1.56535	-2.31853	0.0204204	0.0481958
ENSMUSG00000032908	155.094	-3.5727	0.656243	-5.44418	5.2e-08	1.22e-06
ENSMUSG00000054162	570.156	-3.49663	0.365474	-9.5674	1.1e-21	4.42e-19
ENSMUSG00000036766	2606.93	-3.48292	0.454498	-7.66322	1.81e-14	2.99e-12
ENSMUSG00000096351	134.781	-3.47721	0.679161	-5.11987	3.06e-07	5.42e-06
ENSMUSG00000024579	128.576	-3.29082	0.591498	-5.56353	2.64e-08	7.11e-07
ENSMUSG00000047636	520.803	-3.24124	0.743775	-4.35782	1.31e-05	0.000124177
ENSMUSG00000070524	264.503	-3.23191	0.8606	-3.75542	0.000173052	0.00101049
ENSMUSG00000043843	88.8201	-3.22505	0.705704	-4.56997	4.88e-06	5.37e-05
ENSMUSG00000050711	203.392	-3.21396	0.669506	-4.80049	1.58e-06	2.08e-05
ENSMUSG00000024521	44.812	-3.20669	1.31733	-2.43424	0.0149233	0.0376875
ENSMUSG00000097123	19.7923	-3.19939	1.3178	-2.42782	0.0151898	0.0381267
ENSMUSG00000021913	441.123	-3.19546	0.465254	-6.86821	6.5e-12	6.94e-10
ENSMUSG00000026609	328.031	-3.18141	0.529249	-6.01118	1.84e-09	7.39e-08
ENSMUSG00000038011	65.7016	-3.14114	0.922664	-3.40442	0.000663043	0.00296573
ENSMUSG00000041481	80.9925	-3.12763	1.02994	-3.03672	0.00239171	0.00863487
ENSMUSG00000029413	314.66	-3.11054	0.456965	-6.80696	9.97e-12	9.28e-10
ENSMUSG00000051041	328.497	-3.10572	0.489262	-6.34778	2.18e-10	1.16e-08
ENSMUSG00000033579	81.0054	-2.93717	0.677092	-4.33791	1.44e-05	0.000133275
ENSMUSG00000030683	96.3321	-2.93147	0.688895	-4.25532	2.09e-05	0.000182255
ENSMUSG00000091155	272.037	-2.90978	0.465543	-6.2503	4.1e-10	1.98e-08
ENSMUSG00000043388	1042.39	-2.90454	0.350389	-8.28948	1.14e-16	2.3e-14
ENSMUSG00000032946	26.9075	-2.88796	1.08236	-2.6682	0.00762591	0.0221401
ENSMUSG00000006777	437.223	-2.88759	0.564399	-5.11621	3.12e-07	5.47e-06
ENSMUSG00000042708	159.398	-2.88757	0.595401	-4.84979	1.24e-06	1.67e-05
ENSMUSG00000039278	95.5996	-2.8842	0.7312	-3.94447	8e-05	0.000543951
ENSMUSG00000037159	285.783	-2.85598	0.543883	-5.25108	1.51e-07	2.94e-06
ENSMUSG00000050896	1708.45	-2.8527	0.705238	-4.04501	5.23e-05	0.00038312
ENSMUSG00000032327	967.911	-2.83247	0.402606	-7.03534	1.99e-12	2.33e-10
ENSMUSG00000079436	112.045	-2.83231	0.750654	-3.77312	0.000161218	0.00095765
ENSMUSG00000036242	107.366	-2.82831	0.664495	-4.25633	2.08e-05	0.000181871
ENSMUSG00000063646	255.163	-2.8274	0.765573	-3.69318	0.000221464	0.00122802
ENSMUSG00000005547	297.147	-2.80657	0.469291	-5.98046	2.23e-09	8.6e-08
ENSMUSG00000006711	156.575	-2.80021	0.485657	-5.76582	8.13e-09	2.59e-07
ENSMUSG00000040770	80.6325	-2.77491	1.20312	-2.30644	0.0210863	0.0494174
ENSMUSG00000025963	151.846	-2.71046	0.527576	-5.13758	2.78e-07	4.98e-06
ENSMUSG00000034579	226.107	-2.69956	0.596078	-4.52887	5.93e-06	6.28e-05
ENSMUSG00000033276	267.77	-2.69137	0.857879	-3.13724	0.00170547	0.00658264
ENSMUSG00000004933	298.62	-2.68761	0.492481	-5.45729	4.83e-08	1.15e-06
ENSMUSG00000044017	1358.02	-2.68683	0.420432	-6.39065	1.65e-10	9.68e-09
ENSMUSG00000051177	127.685	-2.68417	1.06325	-2.5245	0.0115863	0.0308742
ENSMUSG00000097045	93.1949	-2.67537	0.768681	-3.48046	0.000500548	0.00236103
ENSMUSG00000079539	76.6686	-2.65694	1.0114	-2.627	0.00861412	0.0245577
ENSMUSG00000029671	33.4409	-2.65469	0.953864	-2.78309	0.00538434	0.0166717
ENSMUSG00000033342	1472.96	-2.63837	0.446247	-5.91235	3.37e-09	1.21e-07
ENSMUSG00000005968	1508.23	-2.61427	0.430566	-6.0717	1.27e-09	5.47e-08
ENSMUSG00000049685	3837.52	-2.60744	0.445062	-5.85859	4.67e-09	1.61e-07
ENSMUSG00000024186	400.441	-2.58873	0.510146	-5.07448	3.89e-07	6.47e-06
ENSMUSG00000081355	73.4545	-2.58833	0.634127	-4.08172	4.47e-05	0.000335459
ENSMUSG00000086753	20.2201	-2.58044	1.07181	-2.40756	0.0160596	0.0395983
ENSMUSG00000027737	914.876	-2.57795	0.405075	-6.36414	1.96e-10	1.11e-08
ENSMUSG00000073792	279.896	-2.56929	0.546195	-4.70398	2.55e-06	3.16e-05
ENSMUSG00000085181	47.04	-2.55479	0.989617	-2.5816	0.0098344	0.0271418
ENSMUSG00000109186	23.1239	-2.55329	1.02275	-2.49648	0.0125431	0.0329166
ENSMUSG00000014503	86.5774	-2.55217	0.640772	-3.98296	6.81e-05	0.000480006
ENSMUSG00000063704	453.099	-2.54014	0.436234	-5.82288	5.78e-09	1.91e-07
ENSMUSG00000064225	528.298	-2.53419	0.43466	-5.83029	5.53e-09	1.88e-07
ENSMUSG00000037418	291.715	-2.52428	0.473278	-5.33361	9.63e-08	1.94e-06
ENSMUSG00000107167	1274.84	-2.51979	0.762213	-3.30589	0.000946751	0.00404084
ENSMUSG00000020182	241.985	-2.5152	0.570442	-4.40921	1.04e-05	0.000100484
ENSMUSG00000044254	450.146	-2.50612	0.531596	-4.71433	2.43e-06	3.03e-05
tg_DsRed	120.249	-2.50489	0.653661	-3.83209	0.000127062	0.0007943
ENSMUSG00000029205	4412.24	-2.50277	0.503823	-4.96756	6.78e-07	1e-05
ENSMUSG00000031893	104.913	-2.50212	0.574428	-4.35584	1.33e-05	0.000124725
ENSMUSG00000021194	655.61	-2.49817	0.379702	-6.5793	4.73e-11	3.43e-09
ENSMUSG00000021198	50.3581	-2.49814	0.842268	-2.96597	0.00301732	0.010457
ENSMUSG00000025955	364.836	-2.49644	0.415354	-6.01038	1.85e-09	7.39e-08
ENSMUSG00000041062	594.193	-2.49307	0.4368	-5.70756	1.15e-08	3.41e-07
ENSMUSG00000054013	663.49	-2.48361	0.337199	-7.36542	1.77e-13	2.38e-11
ENSMUSG00000026980	463.676	-2.47524	0.575578	-4.30044	1.7e-05	0.000155162
ENSMUSG00000019945	280.882	-2.46611	0.457025	-5.396	6.81e-08	1.48e-06
ENSMUSG00000066279	1550.41	-2.45301	0.393724	-6.23029	4.66e-10	2.22e-08
ENSMUSG00000022759	161.305	-2.45231	0.650987	-3.76707	0.000165177	0.000975085
ENSMUSG00000022756	1670.17	-2.44533	0.291546	-8.38747	4.97e-17	1.13e-14
ENSMUSG00000037428	327.85	-2.43828	0.501145	-4.86542	1.14e-06	1.57e-05
ENSMUSG00000035964	3556.08	-2.43259	0.283941	-8.56723	1.06e-17	2.96e-15
ENSMUSG00000094114	167.252	-2.42328	0.759849	-3.18916	0.00142686	0.00571374
ENSMUSG00000106483	121.847	-2.42278	0.71146	-3.40537	0.000660755	0.00295914
ENSMUSG00000027107	1262.16	-2.41633	0.506925	-4.76663	1.87e-06	2.41e-05
ENSMUSG00000049721	394.94	-2.39944	0.407659	-5.88588	3.96e-09	1.4e-07
ENSMUSG00000038576	273.928	-2.39909	0.471603	-5.0871	3.64e-07	6.17e-06
ENSMUSG00000110639	789.162	-2.39628	0.582212	-4.11582	3.86e-05	0.000296871
ENSMUSG00000008153	595.439	-2.38842	0.495084	-4.82428	1.41e-06	1.87e-05
ENSMUSG00000041762	2296.57	-2.38266	0.316803	-7.52096	5.44e-14	7.9e-12
ENSMUSG00000035032	240.12	-2.38155	0.661111	-3.60235	0.000315357	0.00162695
ENSMUSG00000032262	1618.01	-2.37829	0.461782	-5.15024	2.6e-07	4.75e-06
ENSMUSG00000078307	2113.91	-2.37815	0.346977	-6.85392	7.19e-12	7.46e-10
ENSMUSG00000061723	141.379	-2.37267	0.677756	-3.50078	0.000463899	0.00223924
ENSMUSG00000021123	1049.29	-2.36736	0.38953	-6.07748	1.22e-09	5.34e-08
ENSMUSG00000038987	114.204	-2.36198	0.824383	-2.86515	0.00416807	0.0135649
ENSMUSG00000022783	878.175	-2.36113	0.432841	-5.45495	4.9e-08	1.16e-06
ENSMUSG00000053441	122.32	-2.34776	0.599222	-3.91802	8.93e-05	0.000592804
ENSMUSG00000034486	165.534	-2.34602	0.729134	-3.21754	0.00129296	0.00527646
ENSMUSG00000042417	94.436	-2.32864	0.692467	-3.36281	0.000771533	0.0033925
ENSMUSG00000056296	725.002	-2.32522	0.555553	-4.18542	2.85e-05	0.000232841
ENSMUSG00000032181	1581.33	-2.31831	0.45989	-5.04102	4.63e-07	7.44e-06
ENSMUSG00000056812	188.866	-2.31084	0.740675	-3.11992	0.00180902	0.0068944
ENSMUSG00000069170	304.18	-2.30873	0.408153	-5.65654	1.54e-08	4.32e-07
ENSMUSG00000036598	136.765	-2.30045	0.716047	-3.2127	0.00131491	0.005354
ENSMUSG00000027075	359.147	-2.28968	0.453173	-5.05256	4.36e-07	7.07e-06
ENSMUSG00000027344	116.784	-2.28075	0.540679	-4.21832	2.46e-05	0.000206934
ENSMUSG00000027834	216.488	-2.27755	0.440027	-5.17593	2.27e-07	4.22e-06
ENSMUSG00000031688	241.795	-2.27181	0.651316	-3.48803	0.000486601	0.00231629
ENSMUSG00000069072	485.255	-2.26693	0.417026	-5.43595	5.45e-08	1.26e-06
ENSMUSG00000045284	233.062	-2.25255	0.712125	-3.16315	0.00156074	0.00614118
ENSMUSG00000027605	3030.39	-2.25151	0.33062	-6.80996	9.76e-12	9.28e-10
ENSMUSG00000023011	1739.36	-2.24716	0.459259	-4.89302	9.93e-07	1.39e-05
ENSMUSG00000037325	232.574	-2.24344	0.643278	-3.48751	0.000487539	0.00231772
ENSMUSG00000052861	262.45	-2.23916	0.570513	-3.92481	8.68e-05	0.000579822
ENSMUSG00000049420	383.636	-2.23557	0.426319	-5.24389	1.57e-07	3.02e-06
ENSMUSG00000032492	305.963	-2.23054	0.438881	-5.08233	3.73e-07	6.27e-06
ENSMUSG00000071317	213.156	-2.21826	0.572559	-3.87429	0.000106938	0.000689889
ENSMUSG00000036699	2332.48	-2.21225	0.334007	-6.62335	3.51e-11	2.77e-09
ENSMUSG00000030669	565.798	-2.20774	0.627729	-3.51703	0.000436409	0.00215651
ENSMUSG00000056665	65.2991	-2.20472	0.654182	-3.3702	0.000751142	0.00330685
ENSMUSG00000033498	990.011	-2.19991	0.365462	-6.01952	1.75e-09	7.14e-08
ENSMUSG00000109783	42.8054	-2.19932	0.844682	-2.60373	0.00922153	0.025883
ENSMUSG00000109446	488.483	-2.19799	0.438285	-5.01498	5.3e-07	8.27e-06
ENSMUSG00000076617	3923.1	-2.18676	0.323033	-6.76947	1.29e-11	1.17e-09
ENSMUSG00000036853	3482.36	-2.1867	0.319499	-6.84415	7.69e-12	7.55e-10
ENSMUSG00000033633	70.6893	-2.18402	0.828229	-2.63698	0.00836483	0.0239977
ENSMUSG00000048040	1277.14	-2.17993	0.413183	-5.27595	1.32e-07	2.61e-06
ENSMUSG00000037169	162.731	-2.17516	0.524451	-4.14751	3.36e-05	0.000267125
ENSMUSG00000054510	85.8599	-2.16804	0.660898	-3.28044	0.00103646	0.00437722
ENSMUSG00000021790	51.5324	-2.16732	0.794854	-2.72669	0.00639722	0.0191705
ENSMUSG00000037852	27494.3	-2.16676	0.473735	-4.57378	4.79e-06	5.29e-05
ENSMUSG00000037101	1189.07	-2.16076	0.352013	-6.13831	8.34e-10	3.74e-08
ENSMUSG00000028610	171.524	-2.16028	0.60564	-3.56694	0.000361179	0.00183469
ENSMUSG00000030996	1738.83	-2.15131	0.510752	-4.21205	2.53e-05	0.00021033
ENSMUSG00000020930	541.292	-2.1503	0.49874	-4.31147	1.62e-05	0.000149116
ENSMUSG00000090030	259.453	-2.13755	0.538147	-3.97206	7.13e-05	0.000496723
ENSMUSG00000032373	5360.01	-2.13623	0.385287	-5.5445	2.95e-08	7.54e-07
ENSMUSG00000050625	41.6586	-2.12707	0.898483	-2.3674	0.0179135	0.0433456
ENSMUSG00000042647	94.5066	-2.1269	0.642456	-3.31058	0.000931024	0.00398759
ENSMUSG00000038637	223.42	-2.12329	0.493178	-4.30533	1.67e-05	0.000152545
ENSMUSG00000072980	49.3252	-2.12148	0.837909	-2.53187	0.0113454	0.0303436
ENSMUSG00000041132	120.714	-2.11813	0.635328	-3.33392	0.000856325	0.00371142
ENSMUSG00000050505	14535.2	-2.11802	0.362188	-5.84786	4.98e-09	1.71e-07
ENSMUSG00000022245	736.73	-2.1167	0.419087	-5.05073	4.4e-07	7.1e-06
ENSMUSG00000035849	433.332	-2.11665	0.389936	-5.42819	5.69e-08	1.3e-06
ENSMUSG00000085900	52.0331	-2.11568	0.700939	-3.01836	0.00254149	0.00905858
ENSMUSG00000048978	278.639	-2.10723	0.551209	-3.82293	0.000131876	0.000817361
ENSMUSG00000038916	115.788	-2.10604	0.537659	-3.91706	8.96e-05	0.000594085
ENSMUSG00000030074	450.72	-2.10469	0.412625	-5.10075	3.38e-07	5.77e-06
ENSMUSG00000027350	565.122	-2.09306	0.634142	-3.30062	0.0009647	0.00410761
ENSMUSG00000034427	1879.32	-2.08478	0.328315	-6.34993	2.15e-10	1.16e-08
ENSMUSG00000038765	52.8591	-2.08469	0.805468	-2.58818	0.00964851	0.0267303
ENSMUSG00000073574	1134.18	-2.08035	0.559914	-3.71547	0.000202825	0.00114278
ENSMUSG00000031144	1189.12	-2.07943	0.387536	-5.36576	8.06e-08	1.66e-06
ENSMUSG00000015652	111.407	-2.07755	0.68309	-3.0414	0.00235478	0.00857568
ENSMUSG00000039307	173.998	-2.07696	0.455545	-4.55927	5.13e-06	5.52e-05
ENSMUSG00000040972	1228.4	-2.07652	0.490376	-4.23456	2.29e-05	0.000195242
ENSMUSG00000029126	1187.49	-2.07595	0.447311	-4.64096	3.47e-06	4.01e-05
ENSMUSG00000025816	313.466	-2.07464	0.639643	-3.24344	0.00118097	0.00486313
ENSMUSG00000038457	4288.92	-2.07266	0.45239	-4.58157	4.61e-06	5.15e-05
ENSMUSG00000047094	293.032	-2.06653	0.4994	-4.13802	3.5e-05	0.000274806
ENSMUSG00000074673	80.859	-2.06623	0.596873	-3.46175	0.000536675	0.0025151
ENSMUSG00000030207	1870.16	-2.06592	0.30174	-6.84668	7.56e-12	7.55e-10
ENSMUSG00000020926	3740.09	-2.06582	0.402759	-5.12917	2.91e-07	5.18e-06
ENSMUSG00000094500	966.267	-2.06037	0.463827	-4.44211	8.91e-06	8.96e-05
ENSMUSG00000032815	250.92	-2.06017	0.67514	-3.05147	0.00227727	0.00832933
ENSMUSG00000040537	226.543	-2.05979	0.629476	-3.27222	0.00106706	0.00445979
ENSMUSG00000022340	554.765	-2.05669	0.373981	-5.49946	3.81e-08	9.41e-07
ENSMUSG00000086848	756.308	-2.05635	0.577538	-3.56054	0.000370091	0.00187471
ENSMUSG00000066392	5619.19	-2.05007	0.363913	-5.6334	1.77e-08	4.86e-07
ENSMUSG00000049281	160.817	-2.04537	0.518317	-3.94618	7.94e-05	0.000541107
ENSMUSG00000023021	2105.03	-2.03955	0.399554	-5.10457	3.32e-07	5.68e-06
ENSMUSG00000022176	233.972	-2.03828	0.55335	-3.68353	0.000230027	0.00126393
ENSMUSG00000036551	287.423	-2.03345	0.511545	-3.97513	7.03e-05	0.000491312
ENSMUSG00000091002	118.756	-2.03302	0.668885	-3.03942	0.00237037	0.00859684
ENSMUSG00000032101	198.639	-2.02714	0.711139	-2.85056	0.00436426	0.0140773
ENSMUSG00000057069	877.402	-2.02326	0.398687	-5.07479	3.88e-07	6.47e-06
ENSMUSG00000040722	487.22	-2.02229	0.490775	-4.12061	3.78e-05	0.000292624
ENSMUSG00000053153	241.399	-2.02185	0.641601	-3.15126	0.00162567	0.00631488
ENSMUSG00000032417	107.165	-2.01783	0.587033	-3.43733	0.000587472	0.00270431
ENSMUSG00000046873	360.498	-2.01649	0.362417	-5.56401	2.64e-08	7.11e-07
ENSMUSG00000062252	3757.48	-2.0108	0.481953	-4.1722	3.02e-05	0.000242938
ENSMUSG00000029660	122.958	-2.01059	0.693419	-2.89954	0.00373715	0.0124412
ENSMUSG00000028950	188.937	-2.01004	0.649803	-3.0933	0.00197943	0.00743464
ENSMUSG00000043020	920.773	-2.00933	0.354884	-5.66192	1.5e-08	4.23e-07
ENSMUSG00000020576	2556.58	-2.003	0.371897	-5.38589	7.21e-08	1.54e-06
ENSMUSG00000037716	816.643	-2.00248	0.407032	-4.91972	8.67e-07	1.23e-05
ENSMUSG00000000552	1551.73	-2.00092	0.400599	-4.99482	5.89e-07	8.91e-06
ENSMUSG00000042797	468.946	-1.99964	0.468266	-4.27031	1.95e-05	0.000172919
ENSMUSG00000022523	191.374	-1.99571	0.676892	-2.94834	0.00319489	0.0109573
ENSMUSG00000037683	442.773	-1.9933	0.446728	-4.462	8.12e-06	8.3e-05
ENSMUSG00000031934	1224.19	-1.99307	0.350922	-5.67952	1.35e-08	3.89e-07
ENSMUSG00000073125	55.4632	-1.98998	0.817613	-2.43389	0.0149374	0.0376875
ENSMUSG00000051236	2054.99	-1.98838	0.376771	-5.27742	1.31e-07	2.6e-06
ENSMUSG00000038555	337.745	-1.98603	0.530045	-3.74691	0.000179025	0.00103373
ENSMUSG00000062995	1815.52	-1.98561	0.470834	-4.21722	2.47e-05	0.000207014
ENSMUSG00000083282	1309.57	-1.98101	0.340001	-5.82648	5.66e-09	1.9e-07
ENSMUSG00000057191	962.775	-1.98022	0.429829	-4.607	4.09e-06	4.65e-05
ENSMUSG00000035775	179.839	-1.97783	0.544044	-3.63542	0.000277525	0.00147149
ENSMUSG00000059854	307.687	-1.97477	0.528073	-3.73958	0.000184325	0.00105929
ENSMUSG00000039542	609.668	-1.97084	0.362092	-5.44293	5.24e-08	1.22e-06
ENSMUSG00000048355	386.569	-1.96604	0.487837	-4.03012	5.57e-05	0.000402537
ENSMUSG00000075273	1035.77	-1.96381	0.478142	-4.10717	4.01e-05	0.000306908
ENSMUSG00000014773	1032.59	-1.96148	0.70862	-2.76802	0.00563973	0.0173003
ENSMUSG00000033419	1309.3	-1.96142	0.367913	-5.3312	9.76e-08	1.96e-06
ENSMUSG00000028294	1159.46	-1.95936	0.328441	-5.96563	2.44e-09	9.22e-08
ENSMUSG00000053626	578.374	-1.95449	0.677151	-2.88635	0.00389741	0.0129037
ENSMUSG00000028222	323.512	-1.95328	0.398484	-4.90178	9.5e-07	1.33e-05
ENSMUSG00000032245	851.892	-1.95258	0.389666	-5.01091	5.42e-07	8.41e-06
ENSMUSG00000019796	919.618	-1.95207	0.438602	-4.45067	8.56e-06	8.66e-05
ENSMUSG00000041986	8414.88	-1.94887	0.467601	-4.1678	3.08e-05	0.000246584
ENSMUSG00000027220	742.828	-1.94834	0.366164	-5.32096	1.03e-07	2.06e-06
ENSMUSG00000029095	1492.77	-1.9479	0.37688	-5.16849	2.36e-07	4.37e-06
ENSMUSG00000066952	336.895	-1.94417	0.456596	-4.25796	2.06e-05	0.000180986
ENSMUSG00000027848	1296.67	-1.93995	0.369759	-5.24652	1.55e-07	2.99e-06
ENSMUSG00000098590	3104.35	-1.93958	0.49247	-3.93846	8.2e-05	0.000555676
ENSMUSG00000052730	165.479	-1.93851	0.740589	-2.61753	0.008857	0.025073
ENSMUSG00000049649	122.546	-1.93345	0.608696	-3.17637	0.00149129	0.005939
ENSMUSG00000047428	2405.17	-1.93193	0.518969	-3.72263	0.000197158	0.00111887
ENSMUSG00000085881	121.73	-1.93045	0.551899	-3.49783	0.000469066	0.0022535
ENSMUSG00000023868	134.724	-1.92975	0.59411	-3.24813	0.00116167	0.00479998
ENSMUSG00000019235	308.489	-1.92937	0.436246	-4.42267	9.75e-06	9.52e-05
ENSMUSG00000020297	993.873	-1.92691	0.555656	-3.46782	0.000524706	0.00246537
ENSMUSG00000027469	54.3472	-1.92492	0.794314	-2.42338	0.0153769	0.0384105
ENSMUSG00000023017	786.68	-1.92312	0.449318	-4.28009	1.87e-05	0.000167125
ENSMUSG00000021815	244.359	-1.92293	0.535433	-3.59135	0.000328972	0.00168049
ENSMUSG00000010044	594.222	-1.9217	0.375678	-5.11529	3.13e-07	5.47e-06
ENSMUSG00000007646	130.001	-1.92092	0.578748	-3.3191	0.000903097	0.00388171
ENSMUSG00000029765	3352.4	-1.92072	0.306817	-6.26014	3.85e-10	1.91e-08
ENSMUSG00000033060	2837.49	-1.91955	0.296165	-6.48135	9.09e-11	5.79e-09
ENSMUSG00000038486	805.75	-1.91531	0.39906	-4.79956	1.59e-06	2.09e-05
ENSMUSG00000026934	2302.52	-1.91235	0.374196	-5.11055	3.21e-07	5.58e-06
ENSMUSG00000055003	8618.82	-1.91065	0.399379	-4.78405	1.72e-06	2.23e-05
ENSMUSG00000045589	183.221	-1.90952	0.579273	-3.29641	0.000979298	0.00416001
ENSMUSG00000054910	109.015	-1.90841	0.648409	-2.94322	0.00324815	0.0110877
ENSMUSG00000043541	273.927	-1.90826	0.662699	-2.87953	0.00398269	0.0131144
ENSMUSG00000043850	2324.01	-1.9059	0.513037	-3.71493	0.000203259	0.00114278
ENSMUSG00000056752	211.501	-1.90536	0.518628	-3.67385	0.000238927	0.00130298
ENSMUSG00000027950	351.574	-1.90182	0.526069	-3.61515	0.000300171	0.00156641
ENSMUSG00000055809	298.002	-1.90161	0.407984	-4.66099	3.15e-06	3.72e-05
ENSMUSG00000027297	211.546	-1.89376	0.427077	-4.43423	9.24e-06	9.22e-05
ENSMUSG00000020799	3380.79	-1.89252	0.382427	-4.94872	7.47e-07	1.09e-05
ENSMUSG00000023236	5887.93	-1.89016	0.385386	-4.90459	9.36e-07	1.32e-05
ENSMUSG00000087056	94.6138	-1.88648	0.615473	-3.06509	0.00217604	0.00802373
ENSMUSG00000091735	139.063	-1.88617	0.487914	-3.86579	0.000110729	0.000708039
ENSMUSG00000001918	906.193	-1.8812	0.459911	-4.09035	4.31e-05	0.00032456
ENSMUSG00000026514	136.889	-1.87393	0.715214	-2.6201	0.00879033	0.0249698
ENSMUSG00000026576	9172.1	-1.87139	0.40182	-4.65729	3.2e-06	3.77e-05
ENSMUSG00000038271	216.803	-1.87118	0.576189	-3.24751	0.00116419	0.00480491
ENSMUSG00000033177	224.91	-1.86984	0.456306	-4.09777	4.17e-05	0.000317633
ENSMUSG00000012296	3791.4	-1.86869	0.341126	-5.47801	4.3e-08	1.04e-06
ENSMUSG00000022257	4250.37	-1.86605	0.304915	-6.11989	9.36e-10	4.15e-08
ENSMUSG00000097022	98.4889	-1.8652	0.805921	-2.31437	0.0206474	0.0486326
ENSMUSG00000042861	11071.4	-1.8631	0.4568	-4.07859	4.53e-05	0.000338609
ENSMUSG00000043557	135.591	-1.86038	0.700324	-2.65646	0.00789665	0.0228385
ENSMUSG00000021313	160.16	-1.85919	0.611782	-3.03897	0.00237385	0.00859684
ENSMUSG00000021791	246.863	-1.85397	0.528629	-3.50712	0.000452982	0.00222029
ENSMUSG00000036186	128.168	-1.85124	0.732925	-2.52583	0.0115426	0.0307803
ENSMUSG00000041617	365.192	-1.8413	0.47625	-3.86626	0.000110519	0.000708039
ENSMUSG00000048347	100.834	-1.84064	0.775048	-2.37487	0.0175552	0.0425922
ENSMUSG00000029275	3124.35	-1.84042	0.403101	-4.56566	4.98e-06	5.42e-05
ENSMUSG00000047228	139.845	-1.83741	0.473161	-3.88326	0.000103066	0.00066965
ENSMUSG00000029601	195.437	-1.83291	0.507785	-3.60961	0.000306654	0.00158883
ENSMUSG00000075334	811.179	-1.82323	0.439205	-4.1512	3.31e-05	0.000263429
ENSMUSG00000032656	333.852	-1.81979	0.519282	-3.50444	0.000457569	0.00223072
ENSMUSG00000039519	317.081	-1.81835	0.457372	-3.97564	7.02e-05	0.000491201
ENSMUSG00000095654	275.281	-1.81488	0.420218	-4.31891	1.57e-05	0.000144544
ENSMUSG00000001227	520.697	-1.81272	0.421731	-4.29829	1.72e-05	0.000156289
ENSMUSG00000056598	1065.24	-1.8047	0.428778	-4.20894	2.57e-05	0.000212275
ENSMUSG00000020752	336.074	-1.80297	0.526123	-3.42689	0.000610528	0.00278223
ENSMUSG00000004267	2036.63	-1.80258	0.436182	-4.13264	3.59e-05	0.000279508
ENSMUSG00000042581	592.899	-1.80109	0.626663	-2.87409	0.00405189	0.013282
ENSMUSG00000056458	418.218	-1.80047	0.403559	-4.46148	8.14e-06	8.3e-05
ENSMUSG00000006651	4543.61	-1.79971	0.439553	-4.09441	4.23e-05	0.000320262
ENSMUSG00000031155	510.587	-1.7992	0.531741	-3.38359	0.000715435	0.00316885
ENSMUSG00000012819	522.246	-1.79685	0.412665	-4.35426	1.34e-05	0.000125309
ENSMUSG00000029627	248.14	-1.7947	0.427519	-4.19794	2.69e-05	0.000222336
ENSMUSG00000058297	778.307	-1.7935	0.428235	-4.18812	2.81e-05	0.000230609
ENSMUSG00000020175	799.715	-1.79045	0.441699	-4.05354	5.04e-05	0.000372419
ENSMUSG00000044927	51.5454	-1.78912	0.72251	-2.47626	0.0132766	0.0344187
ENSMUSG00000051036	929.508	-1.78862	0.357712	-5.00015	5.73e-07	8.71e-06
ENSMUSG00000048482	7306.62	-1.78768	0.371093	-4.81733	1.45e-06	1.93e-05
ENSMUSG00000022856	1737.14	-1.78674	0.518593	-3.44536	0.000570306	0.00263866
ENSMUSG00000022123	79.1218	-1.78628	0.750003	-2.3817	0.0172331	0.0419507
ENSMUSG00000068082	506.983	-1.78269	0.564313	-3.15905	0.00158285	0.0061883
ENSMUSG00000016200	1006.23	-1.76743	0.363581	-4.86118	1.17e-06	1.59e-05
ENSMUSG00000030276	834.756	-1.76673	0.31993	-5.52226	3.35e-08	8.33e-07
ENSMUSG00000066196	624.089	-1.76542	0.62317	-2.83297	0.00461175	0.0147446
ENSMUSG00000019848	1164.89	-1.76438	0.510074	-3.45907	0.000542041	0.00253698
ENSMUSG00000025576	340.888	-1.76402	0.514307	-3.42991	0.000603792	0.00275846
ENSMUSG00000027827	2172.15	-1.75951	0.41261	-4.26435	2e-05	0.000176742
ENSMUSG00000063531	1143.1	-1.75074	0.387481	-4.51828	6.23e-06	6.58e-05
ENSMUSG00000044719	1597.45	-1.74961	0.419945	-4.16629	3.1e-05	0.000247678
ENSMUSG00000020435	280.567	-1.74347	0.476611	-3.65806	0.000254136	0.00136744
ENSMUSG00000023473	247.377	-1.74077	0.565155	-3.08017	0.00206884	0.00769092
ENSMUSG00000026807	272.544	-1.74	0.548375	-3.17301	0.00150868	0.0059951
ENSMUSG00000078630	1306.24	-1.7361	0.488213	-3.55604	0.000376492	0.00189656
ENSMUSG00000039530	2979.04	-1.73424	0.419642	-4.13266	3.59e-05	0.000279508
ENSMUSG00000035189	1185.77	-1.73226	0.344969	-5.02149	5.13e-07	8.13e-06
ENSMUSG00000021798	674.665	-1.73184	0.342686	-5.05371	4.33e-07	7.06e-06
ENSMUSG00000009075	936.611	-1.72846	0.412311	-4.19213	2.76e-05	0.000227081
ENSMUSG00000057315	353.245	-1.72316	0.420676	-4.09616	4.2e-05	0.00031851
ENSMUSG00000041261	154.764	-1.72229	0.670499	-2.56867	0.010209	0.0279631
ENSMUSG00000019872	1643.89	-1.71731	0.365445	-4.69922	2.61e-06	3.23e-05
ENSMUSG00000026825	1632.95	-1.71724	0.318123	-5.39803	6.74e-08	1.47e-06
ENSMUSG00000037190	3876.68	-1.71469	0.441461	-3.88413	0.000102696	0.000668445
ENSMUSG00000035790	1182.23	-1.71149	0.547441	-3.12635	0.00176989	0.00675947
ENSMUSG00000030306	183.76	-1.70855	0.490234	-3.48518	0.00049181	0.00233497
ENSMUSG00000052031	310.624	-1.70811	0.374133	-4.56551	4.98e-06	5.42e-05
ENSMUSG00000018800	2000.44	-1.70249	0.364649	-4.66885	3.03e-06	3.62e-05
ENSMUSG00000027887	518.349	-1.70189	0.424257	-4.01145	6.03e-05	0.000429768
ENSMUSG00000033068	747.553	-1.69989	0.365733	-4.6479	3.35e-06	3.9e-05
ENSMUSG00000030401	649.963	-1.69938	0.5185	-3.27749	0.00104734	0.00440782
ENSMUSG00000023968	1274.61	-1.69137	0.370219	-4.56856	4.91e-06	5.37e-05
ENSMUSG00000062859	364.393	-1.68891	0.467147	-3.61536	0.000299928	0.00156641
ENSMUSG00000040037	447.513	-1.68396	0.465742	-3.61565	0.000299595	0.00156641
ENSMUSG00000022621	1061.41	-1.68291	0.450006	-3.73976	0.000184198	0.00105929
ENSMUSG00000062444	5073.15	-1.68251	0.374986	-4.48685	7.23e-06	7.52e-05
ENSMUSG00000097353	79.7604	-1.67981	0.717563	-2.34099	0.0192328	0.0459562
ENSMUSG00000021728	1387.72	-1.67529	0.460082	-3.64128	0.000271286	0.00144474
ENSMUSG00000021190	10000.4	-1.67464	0.436431	-3.83712	0.000124485	0.000780882
ENSMUSG00000031438	3414.96	-1.67262	0.451065	-3.70815	0.000208782	0.00117021
ENSMUSG00000029335	247.869	-1.66773	0.439697	-3.79291	0.00014889	0.000897888
ENSMUSG00000030638	212.761	-1.6672	0.526233	-3.16817	0.00153401	0.00607582
ENSMUSG00000075271	331.168	-1.6604	0.672847	-2.46772	0.0135976	0.0350507
ENSMUSG00000027340	1340.81	-1.66004	0.319336	-5.19841	2.01e-07	3.78e-06
ENSMUSG00000029304	168858	-1.6599	0.51393	-3.22981	0.00123871	0.00508362
ENSMUSG00000063409	259.188	-1.65937	0.644042	-2.57649	0.00998081	0.0274832
ENSMUSG00000020577	20608.8	-1.65799	0.437164	-3.79261	0.000149071	0.000897888
ENSMUSG00000044694	320.574	-1.65571	0.684634	-2.41839	0.0155894	0.0388315
ENSMUSG00000040189	772.86	-1.65521	0.454156	-3.64459	0.000267821	0.00142838
ENSMUSG00000026458	132.345	-1.65407	0.686825	-2.40828	0.0160277	0.0395466
ENSMUSG00000034842	679.213	-1.65122	0.504535	-3.27275	0.00106507	0.00445979
ENSMUSG00000036181	315.436	-1.65072	0.470025	-3.51197	0.000444798	0.002192
ENSMUSG00000022960	507.152	-1.64954	0.359627	-4.58682	4.5e-06	5.04e-05
ENSMUSG00000031654	121.802	-1.64836	0.505211	-3.26272	0.00110349	0.00458044
ENSMUSG00000055254	763.054	-1.64469	0.431627	-3.81044	0.000138717	0.000853934
ENSMUSG00000024227	658.382	-1.64118	0.445123	-3.68703	0.000226884	0.00125082
ENSMUSG00000026805	150.314	-1.63566	0.467766	-3.49675	0.000470957	0.00225662
ENSMUSG00000027963	1130.51	-1.63462	0.367233	-4.45119	8.54e-06	8.66e-05
ENSMUSG00000027173	299.046	-1.62626	0.577246	-2.81727	0.0048434	0.0153367
ENSMUSG00000003354	3420.74	-1.625	0.395838	-4.10522	4.04e-05	0.000308206
ENSMUSG00000020486	491.757	-1.62354	0.546693	-2.96975	0.00298047	0.0103589
ENSMUSG00000031428	2381.53	-1.62283	0.383385	-4.23291	2.31e-05	0.000196221
ENSMUSG00000055629	255.548	-1.61768	0.474642	-3.40821	0.000653905	0.00293934
ENSMUSG00000056215	219.389	-1.61409	0.58158	-2.77534	0.00551432	0.0170306
ENSMUSG00000035199	3802.05	-1.61042	0.432917	-3.71993	0.000199279	0.00112738
ENSMUSG00000038010	155.956	-1.61014	0.665516	-2.41938	0.0155468	0.0387817
ENSMUSG00000026958	410.936	-1.60967	0.353565	-4.55269	5.3e-06	5.66e-05
ENSMUSG00000021508	9417.85	-1.60706	0.382876	-4.19733	2.7e-05	0.000222431
ENSMUSG00000029712	133.895	-1.60531	0.64334	-2.49527	0.0125862	0.0330058
ENSMUSG00000038520	950.632	-1.60291	0.377263	-4.24878	2.15e-05	0.000185868
ENSMUSG00000017929	3827.46	-1.59734	0.367286	-4.34903	1.37e-05	0.000127671
ENSMUSG00000019737	5550.74	-1.59328	0.439789	-3.62283	0.000291401	0.00153833
ENSMUSG00000036377	292.497	-1.59116	0.643984	-2.47081	0.0134807	0.0347741
ENSMUSG00000039801	464.312	-1.58944	0.489517	-3.24696	0.00116646	0.00480885
ENSMUSG00000035067	134.069	-1.58817	0.565212	-2.80988	0.00495607	0.0156254
ENSMUSG00000031883	702.09	-1.58428	0.382588	-4.14095	3.46e-05	0.000272494
ENSMUSG00000096257	4356.25	-1.5834	0.471488	-3.3583	0.000784233	0.00343587
ENSMUSG00000056895	1853.52	-1.58248	0.507475	-3.11833	0.00181879	0.00692436
ENSMUSG00000048416	2333.47	-1.58049	0.443221	-3.56591	0.000362595	0.00183931
ENSMUSG00000033966	1434.72	-1.5775	0.343766	-4.58888	4.46e-06	5.03e-05
ENSMUSG00000027358	2616.17	-1.57639	0.430747	-3.65966	0.000252547	0.00136293
ENSMUSG00000020921	984.069	-1.57604	0.388947	-4.05207	5.08e-05	0.000374003
ENSMUSG00000068011	3768.33	-1.57519	0.463515	-3.39836	0.000677912	0.00302107
ENSMUSG00000053930	460.305	-1.57436	0.357796	-4.40015	1.08e-05	0.000104024
ENSMUSG00000015189	691.491	-1.57232	0.483531	-3.25174	0.00114702	0.00474486
ENSMUSG00000048175	2100.72	-1.5697	0.388633	-4.03902	5.37e-05	0.000390504
ENSMUSG00000048029	417.069	-1.5692	0.579941	-2.70579	0.00681419	0.0201743
ENSMUSG00000024749	4702.12	-1.56891	0.318466	-4.92646	8.37e-07	1.2e-05
ENSMUSG00000037738	185.467	-1.56722	0.662368	-2.36609	0.0179772	0.0434709
ENSMUSG00000021594	476.465	-1.56383	0.529147	-2.95538	0.00312283	0.0107508
ENSMUSG00000026622	2320.4	-1.5608	0.387682	-4.02597	5.67e-05	0.000407275
ENSMUSG00000036918	3100.22	-1.55749	0.382054	-4.07663	4.57e-05	0.000340083
ENSMUSG00000030708	1700.6	-1.55748	0.563382	-2.76452	0.00570066	0.0174446
ENSMUSG00000035930	388.351	-1.55559	0.430546	-3.61306	0.0003026	0.00157682
ENSMUSG00000023147	1257.53	-1.55532	0.334161	-4.6544	3.25e-06	3.79e-05
ENSMUSG00000025129	4162.57	-1.55344	0.463143	-3.35412	0.000796182	0.00347147
ENSMUSG00000004748	122.259	-1.55336	0.612254	-2.53712	0.0111769	0.0300255
ENSMUSG00000103499	96.226	-1.55334	0.657104	-2.36392	0.0180827	0.0436388
ENSMUSG00000035126	476.62	-1.55325	0.401335	-3.87021	0.000108742	0.000699029
ENSMUSG00000034532	253.24	-1.54997	0.491794	-3.15166	0.00162346	0.00631305
ENSMUSG00000029658	94.0726	-1.54468	0.540488	-2.85794	0.00426397	0.0138151
ENSMUSG00000049571	933.63	-1.54298	0.318356	-4.84671	1.26e-06	1.69e-05
ENSMUSG00000035578	1096.83	-1.54165	0.389938	-3.95358	7.7e-05	0.000527605
ENSMUSG00000043518	174.926	-1.54071	0.594564	-2.59133	0.00956053	0.0265473
ENSMUSG00000032336	5252.6	-1.54016	0.37429	-4.11489	3.87e-05	0.00029744
ENSMUSG00000026096	136.152	-1.54004	0.585618	-2.62976	0.00854442	0.0244165
ENSMUSG00000029618	1198.72	-1.53881	0.492451	-3.1248	0.00177928	0.00678817
ENSMUSG00000030376	191.034	-1.5371	0.532413	-2.88705	0.00388872	0.0128867
ENSMUSG00000026301	391.645	-1.53551	0.527277	-2.91216	0.00358941	0.0120376
ENSMUSG00000038020	390.596	-1.53338	0.366599	-4.18273	2.88e-05	0.000234036
ENSMUSG00000071398	1380.81	-1.53204	0.532319	-2.87804	0.00400149	0.0131643
ENSMUSG00000044365	398.711	-1.53201	0.400367	-3.82651	0.000129975	0.000808339
ENSMUSG00000019302	3693.46	-1.53134	0.397862	-3.84893	0.000118637	0.000754623
ENSMUSG00000056716	304.567	-1.53093	0.615341	-2.48794	0.0128486	0.033597
ENSMUSG00000058388	1647.06	-1.52885	0.347063	-4.4051	1.06e-05	0.000102137
ENSMUSG00000048497	1045.31	-1.52861	0.304732	-5.01625	5.27e-07	8.27e-06
ENSMUSG00000062980	254.606	-1.52781	0.568975	-2.68519	0.00724876	0.0213006
ENSMUSG00000039987	713.726	-1.52664	0.379989	-4.01759	5.88e-05	0.000420367
ENSMUSG00000092060	155.404	-1.52583	0.563278	-2.70883	0.006752	0.0200517
ENSMUSG00000022262	771.28	-1.52544	0.484911	-3.14582	0.00165623	0.0064199
ENSMUSG00000046961	496.648	-1.52515	0.466076	-3.27231	0.00106672	0.00445979
ENSMUSG00000031847	211.02	-1.52456	0.564517	-2.70064	0.00692054	0.0204686
ENSMUSG00000026546	1070.65	-1.52419	0.334403	-4.55794	5.17e-06	5.53e-05
ENSMUSG00000038150	12466.1	-1.5234	0.43073	-3.53678	0.00040503	0.00202348
ENSMUSG00000055692	891.611	-1.52211	0.404808	-3.76008	0.00016986	0.000998273
ENSMUSG00000050677	521.827	-1.51575	0.43071	-3.51919	0.000432874	0.00214196
ENSMUSG00000058624	234.888	-1.5155	0.505761	-2.99646	0.0027313	0.0096125
ENSMUSG00000024059	910.823	-1.50976	0.388847	-3.88265	0.000103325	0.000670138
ENSMUSG00000040896	96.3141	-1.50699	0.624116	-2.41459	0.0157529	0.0390405
ENSMUSG00000000869	76.5629	-1.50614	0.623584	-2.4153	0.0157221	0.0390313
ENSMUSG00000097787	76.3901	-1.50515	0.623901	-2.41248	0.0158443	0.0392273
ENSMUSG00000024666	991.49	-1.50423	0.320628	-4.6915	2.71e-06	3.28e-05
ENSMUSG00000058454	338.386	-1.50119	0.427603	-3.51072	0.000446899	0.00219937
ENSMUSG00000033949	1952.43	-1.49937	0.34897	-4.29655	1.73e-05	0.000156735
ENSMUSG00000024349	1134.48	-1.49852	0.405923	-3.69164	0.000222815	0.00123363
ENSMUSG00000034059	130.936	-1.49776	0.508338	-2.94638	0.00321512	0.011006
ENSMUSG00000050875	2944.43	-1.49396	0.337195	-4.43057	9.4e-06	9.3e-05
ENSMUSG00000008318	1850.09	-1.49315	0.419461	-3.55968	0.000371309	0.00187784
ENSMUSG00000041809	307.538	-1.48654	0.516789	-2.87648	0.00402135	0.0131938
ENSMUSG00000023277	3856.85	-1.48318	0.426049	-3.48124	0.000499094	0.0023603
ENSMUSG00000004035	2419.57	-1.47985	0.407603	-3.63061	0.000282749	0.00149483
ENSMUSG00000023827	1517.2	-1.4798	0.437064	-3.38578	0.000709757	0.00315525
ENSMUSG00000067219	710.049	-1.47952	0.533493	-2.77328	0.00554947	0.0171246
ENSMUSG00000000308	669.743	-1.47895	0.415882	-3.55619	0.000376273	0.00189656
ENSMUSG00000038132	2851.55	-1.47603	0.376089	-3.92468	8.68e-05	0.000579822
ENSMUSG00000059851	324.929	-1.47573	0.493224	-2.99201	0.00277145	0.00971613
ENSMUSG00000006675	415.047	-1.47452	0.48304	-3.05259	0.00226872	0.00831443
ENSMUSG00000026023	991.391	-1.47414	0.451645	-3.26394	0.00109874	0.00457115
ENSMUSG00000012126	987.985	-1.47387	0.483808	-3.0464	0.00231598	0.00846242
ENSMUSG00000048782	745.225	-1.47135	0.374375	-3.93016	8.49e-05	0.000569914
ENSMUSG00000022805	584.127	-1.47135	0.443414	-3.31823	0.0009059	0.00388916
ENSMUSG00000027273	781.652	-1.46586	0.524895	-2.79268	0.00522739	0.0163109
ENSMUSG00000024713	767.808	-1.4641	0.382347	-3.82923	0.000128542	0.0008008
ENSMUSG00000042616	1444.58	-1.46246	0.478801	-3.05443	0.00225492	0.00827259
ENSMUSG00000028865	16690.1	-1.45914	0.416827	-3.50058	0.000464248	0.00223924
ENSMUSG00000037541	1036.45	-1.45713	0.346108	-4.21005	2.55e-05	0.000211716
ENSMUSG00000004896	189.818	-1.45633	0.507516	-2.86952	0.00411092	0.013427
ENSMUSG00000030825	1047.7	-1.45612	0.416958	-3.49225	0.000478968	0.00228896
ENSMUSG00000018322	2293.91	-1.4559	0.309906	-4.69788	2.63e-06	3.24e-05
ENSMUSG00000027200	1162.5	-1.45234	0.40947	-3.54688	0.000389823	0.00195828
ENSMUSG00000042678	1590.62	-1.45213	0.377175	-3.85001	0.000118111	0.000752595
ENSMUSG00000044469	202.584	-1.45062	0.441085	-3.28876	0.00100631	0.00426476
ENSMUSG00000029094	912.901	-1.445	0.387329	-3.73068	0.000190962	0.00108881
ENSMUSG00000052221	155.575	-1.44308	0.607175	-2.37672	0.0174675	0.042436
ENSMUSG00000039628	1222.32	-1.43723	0.52038	-2.76188	0.00574689	0.0175549
ENSMUSG00000057897	1336.21	-1.43304	0.524599	-2.73168	0.00630118	0.0189139
ENSMUSG00000031007	6815.6	-1.43198	0.473926	-3.02152	0.00251509	0.00899095
ENSMUSG00000042751	210.882	-1.43035	0.461204	-3.10134	0.00192649	0.0072583
ENSMUSG00000032818	2208.69	-1.42952	0.389711	-3.66814	0.00024432	0.00132725
ENSMUSG00000027606	906.429	-1.42915	0.360898	-3.95998	7.5e-05	0.00051658
ENSMUSG00000062563	427.473	-1.42409	0.42082	-3.38409	0.00071415	0.00316831
ENSMUSG00000050549	960.452	-1.42209	0.548436	-2.59299	0.00951442	0.0264394
ENSMUSG00000070287	388.354	-1.41835	0.507835	-2.79293	0.00522326	0.0163109
ENSMUSG00000030979	388.165	-1.41834	0.356632	-3.97704	6.98e-05	0.000489702
ENSMUSG00000003657	8774.86	-1.41727	0.540166	-2.62378	0.00869608	0.0247525
ENSMUSG00000039485	919.622	-1.41647	0.335274	-4.22482	2.39e-05	0.000202452
ENSMUSG00000051359	1054.91	-1.41352	0.462115	-3.05881	0.00222221	0.00817736
ENSMUSG00000040473	1560.98	-1.4128	0.425624	-3.31935	0.000902264	0.00388171
ENSMUSG00000023978	820.474	-1.41271	0.451345	-3.13	0.00174806	0.00669721
ENSMUSG00000091519	816.037	-1.40851	0.46639	-3.02003	0.00252748	0.00902637
ENSMUSG00000030083	288.291	-1.40708	0.458042	-3.07195	0.00212669	0.00787462
ENSMUSG00000031840	1683.03	-1.40633	0.344784	-4.07887	4.53e-05	0.000338609
ENSMUSG00000026578	1202.35	-1.40394	0.347626	-4.03863	5.38e-05	0.000390504
ENSMUSG00000059022	2505.04	-1.40259	0.428164	-3.27581	0.00105359	0.00442899
ENSMUSG00000072893	198.949	-1.39974	0.568594	-2.46176	0.0138258	0.0355129
ENSMUSG00000031129	371.524	-1.39962	0.545021	-2.56801	0.0102285	0.0279953
ENSMUSG00000027676	318.428	-1.39728	0.425316	-3.28527	0.00101885	0.00430786
ENSMUSG00000031543	361.608	-1.39555	0.372132	-3.75015	0.000176725	0.00102535
ENSMUSG00000046688	1006.57	-1.39322	0.489409	-2.84674	0.00441688	0.0141965
ENSMUSG00000031708	9510	-1.39322	0.314618	-4.42829	9.5e-06	9.35e-05
ENSMUSG00000047604	468.47	-1.39279	0.371626	-3.74783	0.000178368	0.00103309
ENSMUSG00000035179	2845.2	-1.39139	0.485851	-2.86382	0.00418567	0.01361
ENSMUSG00000047394	422.816	-1.39045	0.45823	-3.03439	0.00241021	0.00868984
ENSMUSG00000036564	193.942	-1.38811	0.571431	-2.42918	0.0151331	0.0380601
ENSMUSG00000021273	3857.6	-1.38568	0.44669	-3.1021	0.00192151	0.00724707
ENSMUSG00000047379	962.875	-1.38382	0.505396	-2.73809	0.00617977	0.0186156
ENSMUSG00000110266	537.019	-1.38367	0.400201	-3.45743	0.00054535	0.00254918
ENSMUSG00000047669	717.9	-1.3824	0.378202	-3.65518	0.000257003	0.00137878
ENSMUSG00000023961	1569.38	-1.37879	0.394086	-3.49871	0.000467507	0.00225101
ENSMUSG00000039958	415.209	-1.37866	0.458529	-3.00671	0.00264096	0.00938548
ENSMUSG00000022324	150.574	-1.37852	0.576482	-2.39127	0.0167902	0.041079
ENSMUSG00000054034	245.803	-1.37231	0.429575	-3.19457	0.0014004	0.00563262
ENSMUSG00000096472	5296.96	-1.37184	0.433368	-3.16554	0.00154794	0.00612364
ENSMUSG00000022580	1173.95	-1.36786	0.401517	-3.40673	0.000657472	0.00294807
ENSMUSG00000047747	926.016	-1.36759	0.308873	-4.42768	9.53e-06	9.35e-05
ENSMUSG00000032968	157.966	-1.36698	0.543579	-2.51478	0.0119106	0.0315992
ENSMUSG00000041268	683.019	-1.36208	0.354708	-3.84	0.000123037	0.00077447
ENSMUSG00000039531	199.601	-1.35981	0.529764	-2.56682	0.0102637	0.0280284
ENSMUSG00000073633	809.867	-1.3598	0.539805	-2.51905	0.0117671	0.0312642
ENSMUSG00000026452	638.668	-1.35901	0.395638	-3.43499	0.000592578	0.00271285
ENSMUSG00000024897	6548.33	-1.35575	0.363141	-3.73338	0.000188925	0.00107889
ENSMUSG00000075267	3983.3	-1.35419	0.522828	-2.59013	0.00959393	0.0266197
ENSMUSG00000057176	750.654	-1.35314	0.403937	-3.34988	0.000808456	0.00351654
ENSMUSG00000050379	403.213	-1.35119	0.430884	-3.13585	0.00171357	0.00659288
ENSMUSG00000061877	669.692	-1.35113	0.578077	-2.33728	0.0194248	0.0463236
ENSMUSG00000063919	580.155	-1.35088	0.35537	-3.80134	0.000143917	0.000877023
ENSMUSG00000047021	314.67	-1.35048	0.463497	-2.91367	0.0035721	0.0119907
ENSMUSG00000061802	1562.72	-1.34759	0.423804	-3.17976	0.001474	0.00588303
ENSMUSG00000040195	171.637	-1.34738	0.514278	-2.61994	0.00879446	0.0249698
ENSMUSG00000020990	100.523	-1.34529	0.583289	-2.30638	0.0210895	0.0494174
ENSMUSG00000058966	213.547	-1.34499	0.545589	-2.4652	0.0136936	0.0352483
ENSMUSG00000022070	116.287	-1.34366	0.540942	-2.48393	0.0129942	0.0338557
ENSMUSG00000024074	3530.29	-1.33918	0.287516	-4.65776	3.2e-06	3.77e-05
ENSMUSG00000024799	793.408	-1.33826	0.435646	-3.07191	0.00212693	0.00787462
ENSMUSG00000072875	478.901	-1.33677	0.493365	-2.70948	0.00673882	0.020029
ENSMUSG00000020014	354.761	-1.33557	0.445589	-2.99731	0.00272374	0.00959519
ENSMUSG00000059554	109.166	-1.33392	0.556215	-2.39821	0.0164755	0.040514
ENSMUSG00000061751	160.373	-1.33122	0.531321	-2.50549	0.0122282	0.0322768
ENSMUSG00000030889	195.532	-1.33083	0.550055	-2.41945	0.015544	0.0387817
ENSMUSG00000034329	2180.27	-1.32929	0.315461	-4.21379	2.51e-05	0.000209669
ENSMUSG00000042694	1424.88	-1.32842	0.355717	-3.7345	0.000188092	0.00107752
ENSMUSG00000038738	183.77	-1.32548	0.429999	-3.08253	0.00205251	0.00765372
ENSMUSG00000044252	1724.38	-1.32227	0.281667	-4.69445	2.67e-06	3.28e-05
ENSMUSG00000033629	3399.72	-1.3213	0.349055	-3.78536	0.000153489	0.000916054
ENSMUSG00000037196	1140.72	-1.31792	0.453103	-2.90866	0.00362978	0.0121506
ENSMUSG00000094893	508.17	-1.30962	0.488825	-2.67912	0.00738167	0.0216037
ENSMUSG00000048644	451.696	-1.30941	0.407699	-3.21171	0.00131949	0.00536659
ENSMUSG00000022055	2815.18	-1.30916	0.348601	-3.75546	0.000173022	0.00101049
ENSMUSG00000026273	425.213	-1.3085	0.38054	-3.43852	0.000584895	0.00269586
ENSMUSG00000042873	882.386	-1.30736	0.370766	-3.5261	0.000421734	0.00210404
ENSMUSG00000043419	429.514	-1.30697	0.361339	-3.61703	0.000297998	0.0015618
ENSMUSG00000031539	1896.42	-1.30625	0.327052	-3.99401	6.5e-05	0.000461756
ENSMUSG00000027778	795.517	-1.30407	0.353036	-3.69388	0.000220862	0.00122656
ENSMUSG00000030302	4507.08	-1.3013	0.356711	-3.64804	0.000264245	0.00141554
ENSMUSG00000006784	482.753	-1.30008	0.474279	-2.74117	0.00612213	0.0184834
ENSMUSG00000038764	1473.22	-1.29977	0.292977	-4.43642	9.15e-06	9.15e-05
ENSMUSG00000038776	3958.65	-1.29885	0.327247	-3.96902	7.22e-05	0.000501117
ENSMUSG00000074217	367.183	-1.29537	0.375465	-3.45004	0.000560496	0.0025999
ENSMUSG00000019856	273.332	-1.29411	0.438149	-2.95359	0.00314103	0.010793
ENSMUSG00000061603	554.909	-1.29069	0.356763	-3.61779	0.000297127	0.00156078
ENSMUSG00000054708	715.857	-1.2872	0.33909	-3.79604	0.000147023	0.000891203
ENSMUSG00000031174	548.385	-1.2864	0.381377	-3.37303	0.000743451	0.00328493
ENSMUSG00000025060	5378.11	-1.28286	0.303216	-4.23085	2.33e-05	0.000197566
ENSMUSG00000029049	836.669	-1.2774	0.378149	-3.37805	0.00073002	0.00322952
ENSMUSG00000032118	429.231	-1.27705	0.384224	-3.32371	0.000888274	0.00383616
ENSMUSG00000025380	2515.96	-1.27702	0.414211	-3.08303	0.00204905	0.00764866
ENSMUSG00000048706	1806.31	-1.27685	0.410273	-3.11219	0.00185704	0.00705519
ENSMUSG00000018865	1028.62	-1.26973	0.475722	-2.66905	0.00760668	0.022102
ENSMUSG00000064202	206.171	-1.26735	0.519611	-2.43903	0.0147267	0.0373777
ENSMUSG00000010057	564.444	-1.2664	0.527183	-2.4022	0.0162969	0.0401562
ENSMUSG00000026675	6398.7	-1.26558	0.340847	-3.71304	0.000204783	0.00114957
ENSMUSG00000072966	692.657	-1.26454	0.399796	-3.16296	0.00156173	0.00614118
ENSMUSG00000096054	719.322	-1.25935	0.407516	-3.09032	0.00199944	0.00748655
ENSMUSG00000021068	1465.96	-1.25596	0.31686	-3.96376	7.38e-05	0.00051041
ENSMUSG00000106981	152.874	-1.25425	0.460372	-2.72444	0.00644113	0.0192571
ENSMUSG00000060402	1388.03	-1.25387	0.437556	-2.86561	0.00416207	0.0135575
ENSMUSG00000038295	164.086	-1.25227	0.531456	-2.3563	0.0184583	0.0443976
ENSMUSG00000030030	403.873	-1.25057	0.43597	-2.86848	0.00412446	0.0134591
ENSMUSG00000044667	902.628	-1.25008	0.381846	-3.27379	0.00106116	0.00445051
ENSMUSG00000028803	846.431	-1.24999	0.493662	-2.53209	0.0113386	0.0303436
ENSMUSG00000022151	1110.72	-1.24826	0.534244	-2.3365	0.0194654	0.0463901
ENSMUSG00000020904	1765.25	-1.24315	0.480125	-2.58922	0.0096193	0.0266697
ENSMUSG00000053965	820.418	-1.24315	0.314663	-3.95073	7.79e-05	0.000531925
ENSMUSG00000064181	6249.78	-1.2374	0.462076	-2.67791	0.00740839	0.0216645
ENSMUSG00000089774	3658.87	-1.23097	0.352685	-3.49029	0.000482495	0.00230279
ENSMUSG00000028589	964.405	-1.22976	0.501196	-2.45365	0.0141413	0.0361443
ENSMUSG00000028158	279.555	-1.22352	0.452049	-2.70661	0.00679734	0.0201534
ENSMUSG00000007827	670.258	-1.22023	0.369451	-3.30282	0.00095717	0.00408033
ENSMUSG00000063698	247.145	-1.21829	0.402251	-3.02869	0.00245614	0.00880621
ENSMUSG00000026894	354.549	-1.21247	0.501225	-2.41901	0.0155627	0.0387947
ENSMUSG00000025544	5712.64	-1.20889	0.402168	-3.00594	0.00264762	0.00939996
ENSMUSG00000038152	242.473	-1.20755	0.499364	-2.41817	0.0155989	0.0388315
ENSMUSG00000028943	19688.9	-1.20666	0.388494	-3.106	0.00189634	0.00718198
ENSMUSG00000078451	342.877	-1.20427	0.471201	-2.55575	0.0105958	0.0287622
ENSMUSG00000073102	1616.63	-1.20069	0.436996	-2.74759	0.00600341	0.0181855
ENSMUSG00000049555	2288.88	-1.20029	0.448583	-2.67573	0.00745663	0.021753
ENSMUSG00000013155	217.122	-1.19928	0.422889	-2.83593	0.0045692	0.0146214
ENSMUSG00000031904	365.944	-1.19821	0.41844	-2.86352	0.00418968	0.0136108
ENSMUSG00000039018	382.157	-1.19482	0.439289	-2.71991	0.00653004	0.0194882
ENSMUSG00000053040	185.922	-1.19466	0.4582	-2.60728	0.00912644	0.0256558
ENSMUSG00000046567	319.192	-1.19382	0.487865	-2.44704	0.0144035	0.0366856
ENSMUSG00000034248	652.949	-1.19229	0.389352	-3.06224	0.0021969	0.00809243
ENSMUSG00000050556	1515.51	-1.19159	0.413641	-2.88072	0.00396764	0.0130767
ENSMUSG00000018411	1410.69	-1.19146	0.327731	-3.63549	0.000277455	0.00147149
ENSMUSG00000018648	2323.18	-1.18709	0.40093	-2.96085	0.00306791	0.0106222
ENSMUSG00000019923	7322.78	-1.18594	0.353123	-3.35843	0.000783863	0.00343587
ENSMUSG00000041594	1383.29	-1.18511	0.473592	-2.50238	0.0123361	0.0324671
ENSMUSG00000032324	9140.56	-1.18405	0.338551	-3.4974	0.000469821	0.00225415
ENSMUSG00000021368	1428.78	-1.18355	0.511965	-2.31178	0.02079	0.0489049
ENSMUSG00000029108	822.687	-1.17798	0.404175	-2.91453	0.0035622	0.0119685
ENSMUSG00000011154	2665.78	-1.17729	0.430142	-2.73698	0.00620065	0.0186585
ENSMUSG00000075419	857.424	-1.17434	0.361083	-3.25228	0.00114482	0.00474116
ENSMUSG00000040407	5201.55	-1.17354	0.345431	-3.39731	0.000680519	0.00302898
ENSMUSG00000057716	386.617	-1.17282	0.464258	-2.52623	0.0115294	0.0307676
ENSMUSG00000021379	7356.27	-1.17247	0.391014	-2.99853	0.00271288	0.00958481
ENSMUSG00000025175	200.375	-1.17227	0.44326	-2.64465	0.00817747	0.0235906
ENSMUSG00000027581	1232.71	-1.16545	0.33264	-3.50364	0.000458944	0.00223218
ENSMUSG00000062154	896.882	-1.16339	0.499578	-2.32876	0.0198719	0.0472968
ENSMUSG00000015474	512.014	-1.16143	0.363763	-3.19282	0.00140893	0.0056544
ENSMUSG00000071379	1584.85	-1.15962	0.446029	-2.59987	0.00932602	0.0261193
ENSMUSG00000039715	1342.61	-1.15877	0.446593	-2.59468	0.00946793	0.0263506
ENSMUSG00000047712	521.406	-1.15873	0.426298	-2.71812	0.00656534	0.0195774
ENSMUSG00000001504	3887.4	-1.15778	0.40496	-2.85899	0.00424997	0.0137821
ENSMUSG00000041354	564.118	-1.15276	0.389959	-2.9561	0.00311554	0.0107461
ENSMUSG00000039298	2433.84	-1.15145	0.3334	-3.45365	0.000553061	0.00256869
ENSMUSG00000039391	1360.95	-1.15031	0.311314	-3.69501	0.000219874	0.00122294
ENSMUSG00000000167	518.368	-1.1496	0.475916	-2.41556	0.0157112	0.0390308
ENSMUSG00000039910	1244.46	-1.14828	0.350132	-3.27956	0.0010397	0.00438073
ENSMUSG00000021262	1979.25	-1.14677	0.440495	-2.60336	0.00923138	0.0258906
ENSMUSG00000032514	325.338	-1.14036	0.476161	-2.3949	0.016625	0.0407712
ENSMUSG00000078851	890.986	-1.13812	0.37455	-3.03865	0.00237644	0.00859684
ENSMUSG00000026456	1316.98	-1.13612	0.459356	-2.47328	0.0133879	0.0346085
ENSMUSG00000020895	1244.37	-1.13099	0.331788	-3.40877	0.000652564	0.00293855
ENSMUSG00000004018	542.834	-1.12895	0.360591	-3.13083	0.00174315	0.00668545
ENSMUSG00000054051	1492.12	-1.12855	0.320405	-3.52228	0.000427855	0.00212582
ENSMUSG00000026585	2208.2	-1.12829	0.34096	-3.30917	0.000935718	0.00400297
ENSMUSG00000068250	587.19	-1.12779	0.327443	-3.44423	0.000572691	0.00264633
ENSMUSG00000109228	519.929	-1.12437	0.487018	-2.30868	0.0209615	0.0492445
ENSMUSG00000027775	1706.06	-1.11895	0.321493	-3.48047	0.00050053	0.00236103
ENSMUSG00000038312	800.979	-1.11713	0.39918	-2.79856	0.00513305	0.0161134
ENSMUSG00000052727	4452.38	-1.11436	0.338927	-3.28791	0.00100935	0.00427268
ENSMUSG00000040276	792.473	-1.11204	0.473867	-2.34675	0.0189382	0.0453276
ENSMUSG00000028845	862.593	-1.10742	0.461895	-2.39755	0.0165051	0.0405593
ENSMUSG00000032020	2872.2	-1.10732	0.302667	-3.65855	0.000253651	0.00136686
ENSMUSG00000022016	771.907	-1.1056	0.424569	-2.60406	0.0092126	0.0258779
ENSMUSG00000030032	926.995	-1.10418	0.438042	-2.52072	0.0117114	0.0311541
ENSMUSG00000042389	548.098	-1.10298	0.377142	-2.92456	0.00344939	0.0116759
ENSMUSG00000062372	10395	-1.09991	0.31207	-3.52456	0.00042419	0.00211285
ENSMUSG00000030729	4917.33	-1.0987	0.357319	-3.07486	0.00210603	0.00781318
ENSMUSG00000026270	417.286	-1.09834	0.393089	-2.79412	0.00520417	0.0162664
ENSMUSG00000035236	315.59	-1.09685	0.42598	-2.57488	0.0100274	0.0275813
ENSMUSG00000039110	1546.5	-1.09567	0.392966	-2.78821	0.00530004	0.0164618
ENSMUSG00000000876	395.437	-1.09372	0.459149	-2.38205	0.0172165	0.0419385
ENSMUSG00000011658	454.812	-1.09135	0.376427	-2.89924	0.0037407	0.0124416
ENSMUSG00000031284	5663.57	-1.09072	0.302302	-3.60805	0.000308513	0.00159618
ENSMUSG00000004394	3704.19	-1.08928	0.377831	-2.88299	0.00393919	0.0129947
ENSMUSG00000041161	985.419	-1.08804	0.354374	-3.07032	0.00213827	0.0079005
ENSMUSG00000029469	1339.17	-1.08602	0.28904	-3.75735	0.000171724	0.00100597
ENSMUSG00000021662	1548.71	-1.08327	0.322262	-3.36145	0.000775349	0.00340516
ENSMUSG00000033065	1056.6	-1.08205	0.387163	-2.79483	0.00519272	0.0162586
ENSMUSG00000031878	1353.5	-1.08162	0.383372	-2.82134	0.00478235	0.015183
ENSMUSG00000028133	316.362	-1.07469	0.419177	-2.56381	0.0103532	0.0281943
ENSMUSG00000059708	324.356	-1.0729	0.388065	-2.76473	0.00569696	0.0174446
ENSMUSG00000042523	438.168	-1.07274	0.384506	-2.78992	0.00527203	0.0164079
ENSMUSG00000029544	208.506	-1.07161	0.462869	-2.31515	0.0206045	0.048563
ENSMUSG00000031532	6909.61	-1.07118	0.311797	-3.43551	0.000591448	0.00271285
ENSMUSG00000026482	1050.07	-1.06628	0.453513	-2.35115	0.0187157	0.044898
ENSMUSG00000040746	1894.62	-1.06459	0.336525	-3.16347	0.001559	0.00614118
ENSMUSG00000029482	1256.72	-1.0631	0.335865	-3.16526	0.00154946	0.00612364
ENSMUSG00000039419	1212.62	-1.05841	0.361595	-2.92706	0.00342188	0.0115935
ENSMUSG00000028576	2506.39	-1.05583	0.355848	-2.96707	0.00300648	0.0104294
ENSMUSG00000029442	597.625	-1.05342	0.374196	-2.81516	0.00487536	0.0154111
ENSMUSG00000002265	617.5	-1.04953	0.361644	-2.90211	0.00370658	0.0123507
ENSMUSG00000059742	425.86	-1.04916	0.378992	-2.76828	0.00563522	0.0173003
ENSMUSG00000029657	2942.25	-1.04706	0.331338	-3.16011	0.00157711	0.00617912
ENSMUSG00000032251	517.862	-1.04651	0.364211	-2.87335	0.00406139	0.0133
ENSMUSG00000024497	4397.58	-1.04597	0.374851	-2.79035	0.00526511	0.0164004
ENSMUSG00000047193	1437.32	-1.04567	0.38931	-2.68596	0.00723217	0.021269
ENSMUSG00000022610	523.217	-1.04021	0.427194	-2.43498	0.0148927	0.0376875
ENSMUSG00000028637	939.477	-1.03892	0.397454	-2.61395	0.00895025	0.0252582
ENSMUSG00000037847	243.586	-1.03542	0.416287	-2.48727	0.0128727	0.0336304
ENSMUSG00000028952	201.367	-1.0276	0.433907	-2.36826	0.0178718	0.0432739
ENSMUSG00000041939	655.131	-1.02588	0.359271	-2.85544	0.0042977	0.0139062
ENSMUSG00000028391	462.446	-1.02434	0.40711	-2.51612	0.0118655	0.0315026
ENSMUSG00000027603	327.644	-1.01892	0.435477	-2.33977	0.0192956	0.0460459
ENSMUSG00000040929	601.668	-1.01877	0.319177	-3.19185	0.00141363	0.00566699
ENSMUSG00000071324	366.994	-1.01144	0.412683	-2.45088	0.0142506	0.0363981
ENSMUSG00000026102	1067.32	-1.01073	0.354086	-2.85449	0.00431062	0.0139166
ENSMUSG00000027698	2987.86	-1.0107	0.412711	-2.44892	0.0143286	0.036546
ENSMUSG00000031202	391.606	-1.00994	0.385786	-2.61788	0.00884787	0.0250695
ENSMUSG00000038453	493.234	-1.00499	0.335246	-2.99776	0.00271969	0.00959023
ENSMUSG00000022802	450.539	-1.00021	0.418299	-2.39115	0.0167958	0.041079

## Sheet: C_sfHC_co_IP_vs_sfHC_hs_IP
ensembl_gene_id	baseMean	log2FoldChange	lfcSE	stat	pvalue	padj
ENSMUSG00000000088	2877.22	0.773148	0.166212	4.65158	3.29e-06	3.98e-05
ENSMUSG00000000167	736.034	0.0740527	0.225966	0.327717	0.743126	0.829686
ENSMUSG00000000282	242.85	-1.03173	0.365564	-2.82231	0.00476794	0.0187729
ENSMUSG00000000308	1243.96	0.542129	0.195711	2.77005	0.00560471	0.0213177
ENSMUSG00000000359	160.432	-0.789367	0.389413	-2.02707	0.0426556	0.105108
ENSMUSG00000000486	55.3564	-0.184776	0.651896	-0.283444	0.776837	0.85705
ENSMUSG00000000532	100.45	-1.45017	0.503377	-2.88088	0.00396568	0.0162009
ENSMUSG00000000552	2989.44	0.364509	0.179352	2.03237	0.0421166	0.104076
ENSMUSG00000000563	7510.33	0.472334	0.17059	2.76882	0.00562599	0.0213672
ENSMUSG00000000579	102.947	-0.34156	0.475279	-0.718651	0.472356	0.615545
ENSMUSG00000000581	2174.31	0.18185	0.172817	1.05227	0.292676	0.448805
ENSMUSG00000000605	3701.12	-0.187356	0.195545	-0.958121	0.338002	0.491448
ENSMUSG00000000682	5.224	-1.00815	2.29581	-0.439127	0.66057	0.77387
ENSMUSG00000000792	14.4507	1.06435	1.19624	0.889749	0.373601	0.527305
ENSMUSG00000000869	103.292	-0.374135	0.480855	-0.778061	0.436533	0.58729
ENSMUSG00000000876	411.605	-0.911781	0.275286	-3.31212	0.000925922	0.00488576
ENSMUSG00000000976	573.716	-0.0765534	0.247834	-0.30889	0.757405	0.842067
ENSMUSG00000000982	4.36624	-5.37083	2.69374	-1.99382	0.0461718	0.111846
ENSMUSG00000001016	2638.31	0.219008	0.175643	1.24689	0.212436	0.353603
ENSMUSG00000001105	1628.24	0.148977	0.179472	0.830082	0.406492	0.55486
ENSMUSG00000001128	16.018	0.105524	1.3333	0.0791453	0.936917	0.965628
ENSMUSG00000001158	2074.89	0.647266	0.174802	3.70285	0.00021319	0.00143871
ENSMUSG00000001166	109.814	0.621063	0.491999	1.26233	0.206832	0.347558
ENSMUSG00000001175	58791.9	1.01103	0.14586	6.93148	4.16e-12	1.95e-10
ENSMUSG00000001227	705.851	-0.58402	0.227001	-2.57277	0.0100889	0.0337827
ENSMUSG00000001281	486.908	0.666504	0.248899	2.67781	0.00741062	0.0263933
ENSMUSG00000001285	864.878	0.247919	0.211063	1.17462	0.240148	0.3877
ENSMUSG00000001383	2483.25	0.687831	0.170431	4.03583	5.44e-05	0.000449061
ENSMUSG00000001504	4173	-0.868475	0.155395	-5.58883	2.29e-08	5.21e-07
ENSMUSG00000001520	44.8747	0.129019	0.747161	0.172678	0.862904	0.916388
ENSMUSG00000001918	888.132	-2.40379	0.298291	-8.05853	7.72e-16	7.36e-14
ENSMUSG00000001948	1219.62	0.650164	0.202397	3.21232	0.00131669	0.00652016
ENSMUSG00000002028	900.072	-0.632335	0.228652	-2.76549	0.00568369	0.0214597
ENSMUSG00000002043	1241.11	0.785464	0.190175	4.13023	3.62e-05	0.000317413
ENSMUSG00000002064	1589.93	-0.723509	0.20491	-3.53085	0.000414219	0.0024805
ENSMUSG00000002083	80.046	-1.25589	0.565593	-2.22048	0.0263864	0.0729807
ENSMUSG00000002228	62.8628	-0.217115	0.70376	-0.308507	0.757697	0.842067
ENSMUSG00000002265	920.981	0.278559	0.233998	1.19043	0.233876	0.380436
ENSMUSG00000002324	161.245	0.838216	0.465344	1.80128	0.0716587	0.156906
ENSMUSG00000002342	1231.43	-0.505753	0.253393	-1.99593	0.0459418	0.111499
ENSMUSG00000002486	385.548	-0.367238	0.328888	-1.1166	0.264164	0.417059
ENSMUSG00000002625	1815.63	0.420938	0.186953	2.25157	0.0243496	0.0689204
ENSMUSG00000002661	740.532	0.0715059	0.219165	0.326266	0.744223	0.830319
ENSMUSG00000002769	270.634	0.750716	0.350268	2.14326	0.032092	0.084821
ENSMUSG00000002804	1373.48	0.728372	0.185132	3.93433	8.34e-05	0.000650989
ENSMUSG00000002825	245.9	-0.468934	0.330812	-1.41753	0.156329	0.283543
ENSMUSG00000002944	5.70772	1.64241	2.11757	0.775611	0.437979	0.588927
ENSMUSG00000003119	395.632	0.126673	0.271941	0.46581	0.641351	0.75756
ENSMUSG00000003228	45.4509	0.338047	0.725434	0.465993	0.641221	0.75756
ENSMUSG00000003279	306.022	0.253911	0.295208	0.860107	0.38973	0.54066
ENSMUSG00000003354	5302.83	-0.0182513	0.157553	-0.115842	0.907778	0.948437
ENSMUSG00000003355	958.432	-0.167953	0.21738	-0.772624	0.439745	0.590377
ENSMUSG00000003360	179.664	0.742611	0.402396	1.84548	0.0649683	0.146108
ENSMUSG00000003402	2185.11	0.0101545	0.211964	0.0479065	0.961791	0.979672
ENSMUSG00000003411	76.6578	0.707592	0.763522	0.926747	0.354058	0.505937
ENSMUSG00000003657	22585	1.3019	0.165551	7.86403	3.72e-15	3.19e-13
ENSMUSG00000003812	1115.26	0.372627	0.210764	1.76798	0.0770647	0.165783
ENSMUSG00000003863	198.868	-0.368911	0.369528	-0.998328	0.31812	0.472269
ENSMUSG00000003872	158.169	0.736316	0.409319	1.79888	0.0720374	0.157467
ENSMUSG00000003934	14.8161	-0.575565	1.44171	-0.399225	0.689728	0.793587
ENSMUSG00000004018	596.481	-0.753003	0.236488	-3.1841	0.00145204	0.00706808
ENSMUSG00000004035	5257.02	0.914985	0.175448	5.21513	1.84e-07	3.22e-06
ENSMUSG00000004231	231.339	0.302296	0.365694	0.826637	0.408443	0.556844
ENSMUSG00000004263	232.886	0.771705	0.33211	2.32364	0.0201447	0.0596237
ENSMUSG00000004267	4733.92	0.897626	0.208001	4.31549	1.59e-05	0.000157116
ENSMUSG00000004319	3362.32	-0.342764	0.186473	-1.83814	0.0660419	0.147748
ENSMUSG00000004394	5380.29	0.185243	0.189313	0.978506	0.327824	0.482137
ENSMUSG00000004561	220.171	-0.331948	0.357332	-0.928962	0.352909	0.505136
ENSMUSG00000004610	369.542	0.728699	0.32286	2.25701	0.0240072	0.0684864
ENSMUSG00000004748	187.333	-0.0274125	0.44013	-0.0622828	0.950338	0.972091
ENSMUSG00000004865	1065.6	-0.415466	0.197353	-2.10519	0.0352748	0.0902012
ENSMUSG00000004896	222.847	-0.832533	0.376072	-2.21376	0.0268451	0.0737738
ENSMUSG00000004933	574.399	0.0540908	0.290583	0.186146	0.85233	0.909553
ENSMUSG00000004961	71.9152	-0.608548	0.568792	-1.06989	0.284667	0.44025
ENSMUSG00000004980	15166.3	0.931211	0.14791	6.29578	3.06e-10	1.02e-08
ENSMUSG00000004996	474.754	0.0701667	0.252633	0.277742	0.781211	0.859665
ENSMUSG00000005045	656.506	1.06155	0.241935	4.38776	1.15e-05	0.000117962
ENSMUSG00000005089	29.0879	1.1265	0.929856	1.21148	0.225713	0.369727
ENSMUSG00000005150	466.013	0.802448	0.255263	3.14361	0.00166877	0.00797233
ENSMUSG00000005237	247.759	0.495258	0.335604	1.47572	0.140019	0.259762
ENSMUSG00000005371	572.952	-0.580943	0.274662	-2.11512	0.0344194	0.0888925
ENSMUSG00000005442	1272.8	-0.00645188	0.20936	-0.0308172	0.975415	0.986645
ENSMUSG00000005533	1398.96	-0.686899	0.208041	-3.30176	0.000960819	0.00502867
ENSMUSG00000005534	579.728	-0.660163	0.296996	-2.2228	0.0262293	0.0726243
ENSMUSG00000005547	538.834	-0.147154	0.261365	-0.563021	0.573421	0.705024
ENSMUSG00000005580	429.059	-0.669591	0.308813	-2.16828	0.0301377	0.0810915
ENSMUSG00000005687	3640.98	0.432848	0.166525	2.59929	0.00934161	0.0316093
ENSMUSG00000005698	1605.73	-0.19132	0.183382	-1.04329	0.296814	0.451979
ENSMUSG00000005699	536.576	-0.360951	0.243821	-1.4804	0.138767	0.258557
ENSMUSG00000005716	2851.55	0.726086	0.183307	3.96105	7.46e-05	0.000591234
ENSMUSG00000005718	43.9358	-0.55425	0.701822	-0.789731	0.429685	0.581113
ENSMUSG00000005779	4888.07	0.962344	0.162854	5.90925	3.44e-09	9.41e-08
ENSMUSG00000005968	2693.27	-0.120651	0.186773	-0.64598	0.518292	0.65744
ENSMUSG00000005973	11192.9	-0.057187	0.165426	-0.345696	0.729571	0.820011
ENSMUSG00000005983	233.568	-0.277472	0.33304	-0.83315	0.40476	0.553692
ENSMUSG00000006005	2897.65	0.161632	0.184338	0.876822	0.380583	0.533408
ENSMUSG00000006014	19.9703	-1.52748	1.07748	-1.41765	0.156294	0.283543
ENSMUSG00000006021	624.574	0.763156	0.247769	3.08011	0.00206924	0.00965268
ENSMUSG00000006273	7362.35	0.662841	0.15537	4.2662	1.99e-05	0.000190311
ENSMUSG00000006288	1325.17	0.0663395	0.218289	0.303907	0.761199	0.844865
ENSMUSG00000006299	3516.23	0.889336	0.175447	5.06897	4e-07	6.36e-06
ENSMUSG00000006307	264.625	-0.634437	0.314838	-2.01512	0.0438919	0.107129
ENSMUSG00000006335	548.914	0.371098	0.247605	1.49875	0.133938	0.252605
ENSMUSG00000006576	188.027	0.799122	0.373369	2.1403	0.0323304	0.0852978
ENSMUSG00000006586	287.319	-0.528169	0.323367	-1.63334	0.102397	0.206801
ENSMUSG00000006651	7919.72	0.206383	0.181091	1.13967	0.254425	0.405663
ENSMUSG00000006675	597.731	-0.140143	0.248146	-0.564762	0.572236	0.70469
ENSMUSG00000006711	249.837	-0.56604	0.325984	-1.7364	0.0824925	0.175263
ENSMUSG00000006717	2311.33	1.01681	0.188111	5.40537	6.47e-08	1.27e-06
ENSMUSG00000006740	7899.45	0.567617	0.157339	3.6076	0.000309041	0.0019516
ENSMUSG00000006777	941.689	0.29934	0.21959	1.36317	0.172828	0.303201
ENSMUSG00000006784	474.379	-1.47516	0.265436	-5.55751	2.74e-08	6.07e-07
ENSMUSG00000006850	376.049	-1.57351	0.299048	-5.26172	1.43e-07	2.61e-06
ENSMUSG00000006941	6025.05	0.645813	0.155823	4.14452	3.41e-05	0.000302364
ENSMUSG00000007038	1109.91	-0.414389	0.20312	-2.04012	0.0413384	0.10255
ENSMUSG00000007476	226.613	-0.89516	0.372559	-2.40273	0.0162731	0.0495896
ENSMUSG00000007610	275.257	-0.439554	0.351527	-1.25041	0.211148	0.352152
ENSMUSG00000007646	214.146	-0.0207734	0.383418	-0.0541794	0.956792	0.975739
ENSMUSG00000007827	785.653	-0.60416	0.237255	-2.54646	0.0108822	0.0359714
ENSMUSG00000007836	1211.51	0.131565	0.192865	0.682161	0.495137	0.639406
ENSMUSG00000007850	7381.15	0.663956	0.152155	4.36367	1.28e-05	0.000129661
ENSMUSG00000007867	1641	0.266954	0.178237	1.49775	0.134199	0.252789
ENSMUSG00000007880	1826.49	-0.0389028	0.184612	-0.210727	0.8331	0.896837
ENSMUSG00000007888	146.445	1.2576	0.452411	2.77977	0.00543975	0.0208133
ENSMUSG00000007987	1713.43	0.730607	0.175779	4.15639	3.23e-05	0.0002911
ENSMUSG00000008153	940.812	-0.416279	0.227765	-1.82767	0.0675989	0.150577
ENSMUSG00000008200	473.385	-1.07439	0.252921	-4.24794	2.16e-05	0.000202757
ENSMUSG00000008318	2242.13	-0.730729	0.177416	-4.11872	3.81e-05	0.000329199
ENSMUSG00000008763	1646.5	-0.425206	0.184739	-2.30166	0.0213546	0.0624864
ENSMUSG00000008822	617.907	0.502708	0.232433	2.16281	0.0305557	0.0817888
ENSMUSG00000009070	497.154	0.615474	0.276221	2.2282	0.0258673	0.071699
ENSMUSG00000009075	1477.25	-0.0340137	0.187396	-0.181507	0.85597	0.91268
ENSMUSG00000009535	842.231	-0.190227	0.219734	-0.865714	0.386647	0.538611
ENSMUSG00000009640	487.284	-1.50594	0.278909	-5.39939	6.69e-08	1.29e-06
ENSMUSG00000009734	153.906	-0.714438	0.425754	-1.67805	0.0933367	0.192274
ENSMUSG00000010044	1099.45	0.298387	0.199784	1.49355	0.135293	0.254292
ENSMUSG00000010057	995.64	0.554433	0.216437	2.56163	0.0104181	0.0347046
ENSMUSG00000010066	122.188	-1.39663	0.459574	-3.03897	0.00237385	0.0107428
ENSMUSG00000010136	5431.22	0.714815	0.165067	4.33044	1.49e-05	0.000148524
ENSMUSG00000010307	650.733	-2.89282	0.238977	-12.105	9.94e-34	5.12e-31
ENSMUSG00000010362	1398.25	0.863641	0.210178	4.10909	3.97e-05	0.000342094
ENSMUSG00000010608	2237.82	-0.415518	0.176048	-2.36025	0.0182624	0.0546811
ENSMUSG00000010825	86.3586	0.357483	0.713618	0.500944	0.61641	0.736337
ENSMUSG00000010911	617.128	1.16537	0.244704	4.76235	1.91e-06	2.46e-05
ENSMUSG00000011154	5379.93	0.925349	0.171826	5.3854	7.23e-08	1.37e-06
ENSMUSG00000011256	5.34966	-0.746623	1.93015	-0.386821	0.698888	0.799361
ENSMUSG00000011263	14.9617	-2.09683	1.46078	-1.43542	0.151168	0.277053
ENSMUSG00000011305	260.457	0.468457	0.430306	1.08866	0.276304	0.431725
ENSMUSG00000011658	820.999	0.720861	0.211446	3.40919	0.000651563	0.00360812
ENSMUSG00000012126	1754.77	0.445502	0.201546	2.21043	0.0270754	0.0742484
ENSMUSG00000012187	819.383	0.467641	0.245753	1.9029	0.0570541	0.132594
ENSMUSG00000012296	5388.56	-0.453328	0.158933	-2.85232	0.00434019	0.0174384
ENSMUSG00000012483	222.956	-0.86037	0.384528	-2.23747	0.0252554	0.0708418
ENSMUSG00000012819	801.932	-0.166304	0.307871	-0.540174	0.589077	0.714733
ENSMUSG00000013033	436.841	-0.923137	0.276872	-3.33416	0.000855579	0.00457246
ENSMUSG00000013155	261.485	-0.477768	0.320809	-1.48926	0.136419	0.255967
ENSMUSG00000013846	487.217	-0.353109	0.274434	-1.28668	0.198206	0.338001
ENSMUSG00000013858	647.654	-0.667175	0.235691	-2.83072	0.00464433	0.0183683
ENSMUSG00000014075	1492.13	0.498458	0.18059	2.76016	0.00577731	0.0217764
ENSMUSG00000014226	12704	2.26315	0.199112	11.3662	6.16e-30	1.98e-27
ENSMUSG00000014232	729.068	0.305622	0.226402	1.34991	0.177045	0.309078
ENSMUSG00000014503	127.023	-0.769246	0.447941	-1.71729	0.0859256	0.180325
ENSMUSG00000014602	3098.66	1.17838	0.16301	7.22888	4.87e-13	2.61e-11
ENSMUSG00000014773	1127.98	-1.69817	0.229922	-7.38584	1.51e-13	9.51e-12
ENSMUSG00000014778	26.9321	-0.295059	0.943167	-0.312838	0.754404	0.840241
ENSMUSG00000014846	125.954	-1.27587	0.452579	-2.81911	0.00481574	0.0189033
ENSMUSG00000014856	1509.25	-0.200184	0.191731	-1.04409	0.296443	0.451979
ENSMUSG00000014907	246.204	1.26621	0.354606	3.57075	0.000355966	0.00219811
ENSMUSG00000015013	2695.07	0.648456	0.171983	3.77047	0.00016294	0.00115584
ENSMUSG00000015189	837.851	-0.811864	0.21422	-3.78985	0.000150737	0.00107819
ENSMUSG00000015305	136.303	-0.7545	0.486713	-1.55019	0.121095	0.233748
ENSMUSG00000015337	464.729	-0.0221415	0.254444	-0.0870194	0.930656	0.962039
ENSMUSG00000015340	4.45872	-2.75311	2.33953	-1.17678	0.239283	0.387032
ENSMUSG00000015355	2.09622	-4.30714	3.99841	-1.07721	0.281385	0.437013
[truncated: 2,401 more rows]

## Sheet: C_sigGenes in HS
ensembl_gene_id	baseMean	log2FoldChange	lfcSE	stat	pvalue	padj
[truncated: 111 more rows]

[truncated: 7 more sheets: C_sigGenes in Control, D_SC_co_IP_vs_SC_hs_IP, D_sigGenes in HS, D_sigGenes in Control, E_wtHC_co_IP_vs_wtHC_hs_IP, E_sigGenes in HS, E_sigGenes in Control]
